# Supplementary material for: RNF19B confers tumor resistance to CAR T cells
Source: Research Square preprint supplement (doi:10.21203/rs.3.rs-7847831/v1), 2025-10-23
Supplement: Supplementary file 2 [file b68ea8e673a69670530d7730.xlsx]

## Sheet: Huh-7_CAR-T
Protein IDs	Protein names	Gene names	LFQ intensity.NTCTRL.1	LFQ intensity/NTCTRL.2	LFQ intensity.NTCTRL.3	LFQ intensity.NTCTRL.CART.1	LFQ intensity.NTCTRL.CART.2	LFQ intensity.NTCTRL.CART.3	LFQ intensity.RNF19B.OE.1	LFQ intensity.RNF19B.OE.2	LFQ intensity.RNF19B.OE.3	LFQ intensity.RNF19B.OE.CART.1	LFQ intensity.RNF19B.OE.CART.2	LFQ intensity.RNF19B.OE.CART.3
Q13286-4;A0A024QZB8;Q13286;Q13286-3;A0A1B0GWD3;Q13286-2;A0A0A0MRC7;Q13286-5;A0A1B0GV71;A0A1B0GW34;H3BR00;A0A0D9SFH9;Q9UBD8;B4DFF3;O95086;H3BPL0;A0A1B0GWH8;H3BNK7;A0A1B0GV41;H3BR84;O95090;Q9UP10;Q9UBH5;A0A0D9SF04;Q13286-6;Q13286-7;H3BQ48	Battenin	CLN3	121600000	51225000	39268000	27502000	28116000	19984000	53194000	212930000	73401000	44306000	22584000	30024000
A0A024QZW4;Q9H1N7;A0A3B3IRN3;Q9H1N7-2;Q9H1N7-3	Adenosine 3-phospho 5-phosphosulfate transporter 2	SLC35B3	35541000	24634000	21398000	29860000	33217000	44302000	21592000	24473000	26186000	34383000	0	47203000
T2HUW8;A0A087WYX0;A0A024R0K5;P06731-2;P06731;M0QX98;M0QXV9;M0R3J1	Carcinoembryonic antigen-related cell adhesion molecule 5	CEACAM5	0	0	0	0	0	0	0	0	0	0	140000000	70593000
A0A024R442;E7ETB3;Q9ULA0;E7EMB6;F8WAN0;C9JBE1;B9ZVU2;E7EPX3;C9J1E2;C9JRG3;E5RJ35	Aspartyl aminopeptidase	DNPEP	1359300000	1521100000	1617300000	5642400000	5387600000	5267500000	1509900000	1575400000	1622900000	7092400000	6717200000	7384800000
A0A024R4E5;Q00341;Q00341-2;H0Y394;H7C0A4;H7C2D1;C9JIZ1;C9J5E5;H7BZC3;C9JZI8;C9JHZ8;C9JES8;C9JHS7;C9JK79;C9JT62;C9JHN6;C9JEJ8;C9JBS3;C9JQ82;C9JMQ6;C9J739;H7C3D0;C9JHS9	Vigilin	HDLBP	15483000000	15271000000	15738000000	13865000000	14305000000	14411000000	15411000000	16191000000	15890000000	14304000000	14023000000	14770000000
A0A024R4M0;P46781;B5MCT8;C9JM19;F2Z3C0;A8MXK4	40S ribosomal protein S9	RPS9	15843000000	13564000000	16726000000	11445000000	11916000000	11665000000	12778000000	13495000000	13299000000	14013000000	11893000000	12817000000
A0A024R571;Q9H4M9;C9JC03;C9J2Z4;C9JDQ8;C9JIJ3;C9IZH1	EH domain-containing protein 1	EHD1	1746900000	1861300000	2016400000	1668900000	1835300000	1586600000	1869500000	1821200000	1759200000	2223900000	2177000000	2623900000
A0A0A0MTF1;E9PRW4;A0A024R5I4;O94956-2;O94956-4;O94956-3;O94956	Solute carrier organic anion transporter family member 2B1	SLCO2B1	30880000	18319000	30424000	0	0	0	24935000	0	0	0	0	0
A0A0A0MRU5;A0A024R644;O75503;A0A1B0GWI2;A0A087WZY0;A0A1B0GTR6;A0A1B0GWJ7;A0A1C7CYZ2;A0A1B0GTV7;A0A1B0GUE8;A0A1B0GV94;A0A1B0GVL0;A0A1B0GU14	Ceroid-lipofuscinosis neuronal protein 5	CLN5	143210000	145090000	146760000	166170000	182460000	182400000	134530000	148440000	166520000	198260000	144970000	141210000
K7EN05;K7EPC8;A0A024R7E8;K7EQ44;K7EMV4;P60002	Transcription elongation factor 1 homolog	ELOF1	22633000	32295000	0	39218000	41991000	31150000	56855000	36875000	58023000	32437000	74398000	34390000
H0YGQ6;F5GY33;A0A024R7P0;O14593-2;O14593-3;O14593	DNA-binding protein RFXANK	RFXANK	14331000	15033000	11020000	22401000	25461000	23281000	9400800	12465000	10796000	26653000	32784000	16719000
A0A024RA52;P25787;C9JCK5;H3BT36;H7C402	Proteasome subunit alpha type;Proteasome subunit alpha type-2	PSMA2	5201700000	5862700000	5368500000	3431200000	3719300000	3390300000	6256400000	5670300000	6067100000	4094100000	4835200000	4171700000
A0A024RBG1;Q9NZJ9-2;Q9NZJ9-3;Q96G61;Q8NFP7	Diphosphoinositol polyphosphate phosphohydrolase 2;Diphosphoinositol polyphosphate phosphohydrolase 3-beta;Diphosphoinositol polyphosphate phosphohydrolase 3-alpha	NUDT4;NUDT11;NUDT10	0	0	0	85623000	2181900000	2249200000	833180000	2426000000	2084200000	32740000	1854200000	2978900000
E9PRM7;A0A0J9YWM3;A0A024RCG2;Q96BI1	Solute carrier family 22 member 18	SLC22A18	26520000	38817000	43468000	86574000	65963000	63882000	0	0	0	0	0	68467000
Q9UMR5-3;A0A0G2JK02;Q9UMR5;Q9UMR5-2;A0A024RCQ8;A0A0G2JLL3;A0A0G2JHB6;G8JLL2;A0A0G2JH76;A0A0G2JLA3;A0A140T9Y1;A0A0G2JKR3;A0A0G2JIU6;A0A140T8X7;A0A0G2JID8;A2ABN7;A0A0G2JLK6;A0A0G2JK07;A0A0G2JI52;A0A0G2JLK8;A2ABN6;A0A0G2JLK3	Lysosomal thioesterase PPT2	PPT2;hCG_1999928	200540000	222300000	231160000	128510000	114200000	92580000	199170000	206010000	187430000	78611000	311000000	132260000
P46379-3;P46379;P46379-2;A0A0G2JK23;A0A024RCR6;P46379-5;A0A0G2JL47;P46379-4;A0A0G2JJM1;X6REW1;F6S6P2;H0Y710;H0Y4L1;F6WML8;F6VEM6;F6X9W3;F6U341;A0A0G2JJR8;F6XTU0;F6U1F2;F6UR09;A0A1B0GX79;F6TC96;H0Y759;A0A0G2JIA9;A0A0G2JIB3;A0A0G2JJ92;H0Y7K4	Large proline-rich protein BAG6	BAG6;BAT3	1700400000	1922400000	1843300000	2652500000	2709800000	2782600000	2014800000	2015900000	2049400000	2066400000	2308200000	2122400000
G5E9M7;Q14135-4;Q14135;Q14135-2;A0A0A6YYI5;A0A075B6E4;G5E9M9;E7EWF5;Q14135-6;Q14135-5;E7EQU6;E7ERW0;C9JBN2;F8W708;F8WBN7;E7EUJ2;C9JX59	Transcription cofactor vestigial-like protein 4	VGLL4	115780000	134850000	101540000	136060000	133740000	140760000	120950000	146750000	125460000	109580000	111550000	94459000
A0A075B6P0;Q330K2-2;Q330K2	NADH dehydrogenase (ubiquinone) complex I, assembly factor 6	NDUFAF6	14579000	10499000	14680000	22051000	21025000	0	23042000	18525000	27339000	35449000	53652000	0
A0A075B6Q3;Q5H9F3-3;Q5H9F3;Q5H9F3-2;H7C4B2	BCL-6 corepressor-like protein 1	BCORL1	134070000	210210000	128280000	283060000	223010000	259720000	149610000	107300000	118390000	115360000	91969000	102080000
H0YE34;A0A075B6T1;Q9C0C7-4;Q9C0C7-2;Q9C0C7-3;Q9C0C7;Q9C0C7-5	Activating molecule in BECN1-regulated autophagy protein 1	AMBRA1	2482300	1633500	1637100	1680600	6620000	6413700	0	0	1263500	1745300	0	0
A0A075B6T4;Q9NVX7;Q9NVX7-2;E9PL18;E9PQ38	Kelch repeat and BTB domain-containing protein 4	KBTBD4	79093000	54856000	78277000	58003000	68883000	55981000	43410000	43840000	43520000	47104000	62939000	52772000
A0A075B730;P58107	Epiplakin	EPPK1	672220000	718750000	676000000	410910000	425730000	502480000	403170000	443730000	432720000	549860000	546460000	632370000
K7ELY8;A0A075B773;O00623	Peroxisome assembly protein 12	PEX12	17022000	14706000	17652000	0	0	0	0	0	0	0	0	0
A0A075B784;Q9P275;E9PEW0;K7EMM6;K7EQS0;K7EPT1;K7ELR5;Q8IXW9;K7ERC1;K7ELT3	Ubiquitin carboxyl-terminal hydrolase;Ubiquitin carboxyl-terminal hydrolase 36	USP36	83868000	81418000	74753000	104140000	80979000	80974000	79165000	86941000	107480000	108520000	79214000	92552000
V9GY97;A0A087X0V7;A0A087WYH9;A0A075B7G8;J3KPL8;O00213-4;O00213-6;O00213-3;O00213-5;O00213-2;O00213	Amyloid beta A4 precursor protein-binding family B member 1	APBB1	0	0	0	12724000	0	0	0	0	0	10750000	36313000	0
A0A087WSV0;M0QZM6;Q9HB09-3;Q9HB09;M0R1Z8;M0R1K0;I6LJZ7;I6LK00;I6LJZ9;Q9HB09-2	Bcl-2-like protein 12	BCL2L12	37114000	34035000	36404000	58650000	50882000	56932000	13100000	26545000	0	41394000	57788000	73967000
A0A087WSV8;P80303-2;P80303;E9PKG6;Q2L696;E9PLR0;E9PLE9;A0A2R8Y6G7;H0YEG8;H0YD18;E9PM22;E9PJP3	Nucleobindin-2;Nesfatin-1	NUCB2;Nucb2	1349800000	1277700000	1213300000	1537100000	1397600000	1258900000	1313200000	1363900000	1327600000	1149800000	1135200000	1177900000
A0A087X2I2;A0A087WT12;P36969-2;P36969;K7ERP4;K7EKX7;K7ENB4;K7EJ20;R4GNE4;A0A087X247;A0A0A0MTT1	Glutathione peroxidase;Phospholipid hydroperoxide glutathione peroxidase, mitochondrial	GPX4	727240000	787960000	812970000	1913400000	1891400000	2126600000	1104600000	992880000	981970000	2550000000	2972200000	2443600000
A0A087WT20;Q9NV06;B3KME9;E5RHM4;A0A087X1F8;Q9NV06-2	DDB1- and CUL4-associated factor 13	DCAF13	326940000	282900000	358960000	309360000	231520000	295110000	310090000	369890000	338660000	466630000	290930000	415960000
A0A087WT21;Q9BXF3-3;Q9BXF3;B7WPH3;A0A0R4J2E1;Q9BXF3-2;H0Y2Z1	Cat eye syndrome critical region protein 2	CECR2	52393000	45642000	44262000	37883000	60700000	50961000	43558000	36308000	51923000	70753000	28894000	0
A0A087WV67;A0A087WT23;O00124-3;O00124;A0A087WUA4;O00124-2	UBX domain-containing protein 8	UBXN8	0	0	9548600	0	16431000	14918000	5583300	19705000	9706800	0	0	12594000
A0A087WT42;Q9NY64;H0Y7M6;Q5VVW5;Q5VVV6;Q5VVW0;Q5VVV3;Q5VVV5;Q5VVV4;Q5VVV9	Solute carrier family 2, facilitated glucose transporter member 8	SLC2A8	81252000	51881000	92738000	29114000	51364000	59407000	40095000	64013000	55257000	48174000	30870000	68895000
Q96QZ7;Q96QZ7-2;Q96QZ7-6;Q96QZ7-7;Q96QZ7-5;Q96QZ7-3;Q96QZ7-4;A0A087WT53;H7C535;A0A087WXD2;H7C5T8;H7C4U7;A0A0D9SEY4;E7EWI0;A0A1B0GTC0;A0A1B0GUV4;H7C4S7;A0A0D9SGF8;A0A0D9SET0;A0A0D9SGF2;A0A1B0GUI9;A0A1B0GUF0;A0A1B0GTH8	Membrane-associated guanylate kinase, WW and PDZ domain-containing protein 1	MAGI1	33551000	38553000	32471000	0	0	20706000	42329000	37042000	33309000	24968000	19753000	33960000
A0A087WT99;Q9H0W9-2;Q9H0W9;E9PJU8;E9PQS1;Q9H0W9-4;E9PPB5;Q9H0W9-3;E9PR95;E9PSC3;E9PLC5;E9PLB3;E9PIP1	Ester hydrolase C11orf54	C11orf54	475800000	427160000	405340000	367640000	281570000	240040000	526630000	481060000	526570000	443810000	344800000	298430000
A0A087WTA5;Q9UI10-3;Q9UI10-2;H7C2L8;F8WEV6	Translation initiation factor eIF-2B subunit delta	EIF2B4	36330000	21414000	19327000	27753000	27289000	26089000	10916000	21399000	21948000	17441000	13613000	18523000
A0A087WTA8;P08123	Collagen alpha-2(I) chain	COL1A2	0	0	0	21382000	13963000	20873000	0	0	0	0	0	0
A0A087WTK0;A0A087WVC6;Q12913;Q12913-2;E9PPH3	Protein-tyrosine-phosphatase;Receptor-type tyrosine-protein phosphatase eta	PTPRJ	520520000	501170000	530140000	385240000	440030000	414230000	480520000	466530000	480700000	496340000	476240000	502880000
K9J972;H7C5Z8;A0A087WTM9;P25445-5;P25445-4;P25445-7;P25445-6;P25445	Tumor necrosis factor receptor superfamily member 6	FAS	0	0	0	22717000	20216000	21893000	0	0	0	0	0	10550000
A0A087WTS0;P18283;H0YJK8;G3V4J6;G3V323	Glutathione peroxidase;Glutathione peroxidase 2	GPX2	42998000	102430000	59516000	290050000	291720000	217650000	110340000	77383000	125890000	184710000	179790000	190290000
A0A087X0S7;A0A087WTU1;A0A0B4J2G4;Q15345-3;Q15345;A0A0C4DH00	Leucine-rich repeat-containing protein 41	LRRC41	24182000	24149000	21146000	32190000	33081000	47039000	17529000	23966000	20264000	21530000	21128000	22778000
A0A087WTU4;Q9P227-2;Q9P227	Rho GTPase-activating protein 23	ARHGAP23	0	0	0	0	0	0	0	0	0	15023000	0	0
A0A087WVR3;A0A087WTW0;Q96T88;Q96T88-2;A0A087WWG9	E3 ubiquitin-protein ligase UHRF1	UHRF1	262950000	276180000	258030000	113860000	169600000	175200000	245570000	273980000	209730000	233660000	247340000	266930000
A0A087WTY7;Q9H227;A0A087WWR5;Q9H227-2	Cytosolic beta-glucosidase	GBA3	364170000	510950000	351750000	14467000	52861000	0	515010000	697090000	579610000	63281000	55501000	94261000
A0A087WU02;Q96RQ1;F8W0R1;F8VPA6;F8VR88;F8VUZ2;H0YI50;H0YI58	Endoplasmic reticulum-Golgi intermediate compartment protein 2	ERGIC2	132560000	43641000	132600000	137890000	99157000	114410000	75010000	183940000	123280000	170610000	69222000	64217000
A0A087WU05;A0A087WY48;Q8IY22-3;Q8IY22-2;Q8IY22	C-Maf-inducing protein	CMIP	41710000	41320000	38742000	33782000	24104000	25476000	19877000	23139000	27478000	39075000	0	15765000
A0A087WU31;A0A0A0MTB7;P51790-4;P51790-5;P51790;E9PE15;G3XAG5;P51793-2;P51795;P51793;P51795-2;H0Y8Z8;A0A2R8Y6C4;A0A2R8YGW0	Chloride channel protein;H(+)/Cl(-) exchange transporter 3	CLCN3	316070000	270440000	276560000	325200000	332320000	339890000	322720000	294690000	281230000	263690000	280390000	252730000
A0A087WU53;Q9H0U3;Q9H0U3-2	Magnesium transporter protein 1	MAGT1	515500000	254850000	622430000	417980000	489090000	494950000	134490000	452900000	204550000	451310000	391700000	518970000
A0A087WU64;A6NMQ1;P09884	DNA polymerase;DNA polymerase alpha catalytic subunit	POLA1	549480000	402030000	507740000	191610000	301600000	288600000	531350000	558410000	589070000	397480000	0	259510000
A0A087WUB9;Q8WYA6-4;Q8WYA6;Q8WYA6-3;Q8WYA6-2;A2A2P1	Beta-catenin-like protein 1	CTNNBL1	1086900000	1464700000	1154000000	1543200000	1630100000	1600900000	1155900000	1224900000	1301500000	1403100000	1340000000	1287700000
A0A087WUC6;E9PI68;Q15005;E9PL01;E9PRB9;H0YE04	Signal peptidase complex subunit 2	SPCS2	1251400000	773450000	1379600000	1126000000	969750000	950820000	633690000	1256800000	857080000	1554500000	1259000000	1295000000
A0A087WUD3;Q9NRP0;Q9NRP0-2	Oligosaccharyltransferase complex subunit OSTC	OSTC	548680000	0	530700000	386610000	395090000	255400000	167700000	441650000	212640000	155110000	167100000	500730000
A0A0A0MQV6;A0A087WUF6;P09038-2;P09038-3;P09038-1;P09038	Fibroblast growth factor;Fibroblast growth factor 2	FGF2	0	0	0	0	0	0	0	5453900	4668100	52273000	0	50274000
G5E9H5;A0A087WUJ3;Q9Y5X0;C9JQ16;J3QRB9;J3KTN6;J3QLV8;Q9Y5X0-2	Sorting nexin-10	SNX10	0	0	0	0	23661000	37957000	0	0	0	27160000	27314000	16296000
A0A087WUK2;O14979-3;O14979-2;O14979	Heterogeneous nuclear ribonucleoprotein D-like	HNRNPDL	2659500000	3039900000	2825100000	4295200000	4588200000	4423600000	3495800000	3431900000	3706600000	5389600000	6800300000	4737300000
A0A087WUL4;A0A087WX23;A0A087WXK2;Q86TG7;A0A087WZG9;B4DSP0;Q86TG7-2;A0A087WYS2	Retrotransposon-derived protein PEG10	PEG10	822770000	818110000	453050000	24857000	41140000	50269000	778970000	645410000	713800000	78185000	89470000	43708000
A0A087WUM0;A0A087X1F5;A0A087WYV9;P57105;A0A087WTA2;A0A087WX56;Q9P0S2	Synaptojanin-2-binding protein	SYNJ2BP-COX16;SYNJ2BP	593140000	482760000	621550000	660830000	627270000	650940000	546270000	604320000	528230000	653420000	591520000	790260000
A0A087WUN5;Q96DE5	Anaphase-promoting complex subunit 16	ANAPC16	0	18843000	0	0	0	0	0	0	0	0	0	0
A0A087WUN7;H0YJ40;G3V4X6;G3V2S9;Q9GZT3-2;Q9GZT3;H0YJW7;H0YJ07;H0YJU7;H0YJI1	SRA stem-loop-interacting RNA-binding protein, mitochondrial	SLIRP	3580600000	3322600000	4154300000	2551800000	2749000000	2327900000	3667800000	4005600000	4172400000	3114700000	3067400000	2601600000
A0A087WUQ6;P07203;A0A2R8Y6B6;A0A494C1C9;A0A494C118;P07203-2	Glutathione peroxidase;Glutathione peroxidase 1	GPX1	1234000000	1385600000	1367800000	2842800000	3111200000	2652500000	1371400000	1468600000	1409100000	2590600000	3298200000	2602700000
E7ETK0;A0A2R8Y849;A0A087WUS0;A0A2R8YD14;P62847-2;P62847-3;P62847;P62847-4;A0A2R8Y8A0	40S ribosomal protein S24	RPS24	6420000000	6048300000	6612500000	4546700000	5261000000	4956800000	7072700000	5939800000	6296900000	6020600000	6473100000	5870800000
A0A087WUT6;O60841	Eukaryotic translation initiation factor 5B	EIF5B	7518800000	8072000000	7586700000	7231000000	7614700000	7465800000	8101800000	8016900000	8179000000	8527200000	8546000000	9270900000
A0A087X0G7;A0A087WUW6;A0A087X1B1;Q9Y6K9;Q9Y6K9-2;C9JN51;A0A087WV30;Q9Y6K9-3;C9J2V2;C9JH59;C9JCG6	NF-kappa-B essential modulator	IKBKG	52062000	55769000	44457000	68269000	63992000	98913000	53014000	66980000	53081000	111960000	62952000	119200000
Q9NXU5;A0A087WUW9;A0A0B4J222	ADP-ribosylation factor-like protein 15	ARL15	36552000	34426000	31198000	30394000	43129000	34923000	30181000	37256000	27603000	43442000	38006000	0
A0A087WUZ7;Q9Y5W8-2;Q9Y5W8	Sorting nexin-13	SNX13	31891000	23034000	16446000	19863000	0	0	37356000	30659000	36419000	25432000	0	20350000
Q99417;A0A087WV05;A0A0D9SEI7	C-Myc-binding protein	MYCBP	1136500000	1168800000	1009700000	1088900000	1175400000	1212600000	1130000000	1146700000	1204200000	1133500000	1286700000	992750000
F8W7C6;A0A087WV22;H7C123;H7C2C5;H7C2U2		RPL10	233040000	186080000	201230000	237470000	168570000	156100000	149110000	189320000	196490000	152770000	117750000	115610000
A0A087WV24;P20711-3;P20711;H7BZF7;A0A087WU57;P20711-4;P20711-2;F8WER1;C9JMP0	Aromatic-L-amino-acid decarboxylase	DDC	1108700000	1102000000	990700000	481030000	334490000	415670000	1412200000	1638600000	1670500000	956580000	635310000	722930000
A0A087WV45;P02766	Transthyretin	TTR	0	0	0	0	0	0	34885000	40631000	29566000	0	0	0
Q6IAK0;A0A087WVA1;P62341	Selenoprotein T	SELT	35054000	24464000	35046000	47245000	57297000	60980000	17446000	34428000	25620000	35501000	22141000	32081000
A0A087WVF7;Q9NZM3-2;Q9NZM3;Q9NZM3-4;Q9NZM3-3;E7EPJ2;H0Y6W3;H7BZD4;Q6J334;H0Y3G5	Intersectin-2	ITSN2	111330000	99319000	120980000	140310000	134600000	167680000	134050000	130550000	137390000	157470000	206350000	153330000
E5RGS7;H0YBP7;B3KPU0;A0A087WVI1;Q96JY6;Q96JY6-3;Q96JY6-5;A0A087WUQ1;C9JS55;H7C1D1;Q96JY6-4	PDZ and LIM domain protein 2	PDLIM2	0	26470000	0	0	0	0	28282000	0	0	0	0	0
A0A087WVM4;B7ZM99;Q6UB35;H0Y327;Q6UB35-2;Q4VXM0;Q5JYA8;Q5JYA3;Q4VXV2;Q4VXM1	Monofunctional C1-tetrahydrofolate synthase, mitochondrial	MTHFD1L	2234800000	2141900000	2009700000	1351000000	1341500000	1395400000	2270900000	2209900000	2315100000	1693900000	1770200000	1592600000
H3BRQ8;A0A087WVP7;P0C024-3;P0C024-2;P0C024;H3BMZ7	Peroxisomal coenzyme A diphosphatase NUDT7	NUDT7	21316000	21775000	19546000	0	0	14003000	24017000	28236000	30207000	12118000	0	0
A0A087WVQ6;Q00610-2;Q00610;J3KS13;K7EJJ5;J3KRF5;J3KSQ2;J3QL20;F5H5N6	Clathrin heavy chain;Clathrin heavy chain 1	CLTC	77648000000	80686000000	75597000000	83063000000	82016000000	85191000000	88743000000	80516000000	85657000000	87378000000	102790000000	86346000000
A0A087WVT1;Q96MX3	Zinc finger protein 48	ZNF48	18841000	0	25570000	21841000	22275000	27749000	0	0	0	0	0	0
D6RAC5;U3KQ46;A0A087WVT6;A0A087X159;P81877-2;P81877-4;P81877-5;P81877-3;Q9BWW4-2;P81877;Q9BWG4-2;Q9BWW4-3;Q9BWG4;Q9BWW4	Single-stranded DNA-binding protein 2;Single-stranded DNA-binding protein 3;Single-stranded DNA-binding protein 4	SSBP2;SSBP4;SSBP3	43298000	55809000	59616000	16710000	18029000	14809000	63349000	59119000	61618000	29423000	35272000	0
A0A087WVZ9;P19388;A0A087WWX0;A0A0A0MQR7;A0A087WVN5	DNA-directed RNA polymerases I, II, and III subunit RPABC1	POLR2E	616080000	533930000	494450000	311560000	200510000	191090000	581250000	505940000	602840000	418050000	246680000	324560000
A0A087WW06;Q96AY4;B0QYP5;B0QYP4	Tetratricopeptide repeat protein 28	TTC28	125160000	274530000	143770000	162640000	135740000	168350000	99395000	118700000	113260000	114280000	31770000	96046000
A0A087WW40;Q9Y371;Q9Y371-2;Q9Y371-3	Endophilin-B1	SH3GLB1	232350000	287040000	248470000	1084400000	1069900000	856480000	206690000	195740000	224410000	737630000	779420000	683870000
Q9C0D9;A0A087WW58;C9JAG1	Ethanolaminephosphotransferase 1	EPT1	96815000	54387000	91677000	83419000	97388000	99811000	39901000	49638000	38005000	81373000	86713000	98281000
A0A087WW66;H7C378;H7BZR6		PSMD1	0	15172000	11344000	24883000	31048000	0	23870000	0	14576000	0	0	55762000
A0A087WW74;O94885	SAM and SH3 domain-containing protein 1	SASH1	13440000	14410000	13722000	7769100	0	0	6343500	16304000	15485000	0	0	8960500
O60333-4;O60333;Q4R9M9;A0A087WWA3;O60333-2;A0A0U1RQL3;A0A3B3IUA1;A0A3B3ITW6;A0A3B3ITF7;A0A3B3IT28;A0A3B3ITE5;A0A3F2YNW9;A0A3B3IU40;Q12756;Q12756-3;Q12756-2;F8W8V9;A0A3B3ITK3;H7C3Y8;H7C0K6	Kinesin-like protein KIF1B;Kinesin-like protein	KIF1B;KIF1Bbeta	529220000	470410000	467960000	362520000	398930000	402550000	534380000	538870000	534690000	475550000	427590000	416820000
A0A087WWF1;Q8WWX9	Selenoprotein M	SELM	9930800	0	0	280650000	277310000	293510000	28467000	8220600	17685000	96219000	116650000	99850000
A0A087WWF6;P49005;F8W8R3;C9JLE1;C9IZD2;C9J8Z7;C9JHC7;H7C1B3	DNA polymerase delta subunit 2	POLD2	512400000	500220000	606380000	411380000	436770000	427050000	603600000	660200000	699080000	569430000	607670000	537340000
A0A087X140;A0A087WWG3;A0A0A6YYH9;Q5RIB0;H0Y5V3;A0A0A0MRU4;Q5RIA9-3;Q5JTY5-2;Q9BRT8-3;Q9BRT8;Q5RIA9;Q5JTY5;Q4V339;A0A0B4J2F1;Q9BRT8-2;F2Z2T4	COBW domain-containing protein 5;COBW domain-containing protein 3;COBW domain-containing protein 1;COBW domain-containing protein 6	CBWD1;CBWD3;CBWD5;CBWD7;CBWD6	127860000	127330000	110150000	94314000	114190000	108430000	120140000	128620000	120860000	60800000	0	117170000
A0A087WWH3;Q9NZM4-2;Q9NZM4	Glioma tumor suppressor candidate region gene 1 protein	GLTSCR1	15287000	13067000	16068000	31257000	15626000	34863000	14447000	14021000	16709000	14897000	0	9903600
A0A087WWI3;A0A0C4DGP9;Q3ZCX4-2;Q3ZCX4	Zinc finger protein 568	ZNF568	76619000	96457000	39690000	41868000	42361000	0	71396000	0	58485000	84898000	0	0
A0A3B3IU98;A0A0C4DGT3;A0A2R8Y7T6;A0A087WWK8;A0A3B3IRZ4;Q6DN90-2;Q6DN90;A0A2R8Y695	IQ motif and SEC7 domain-containing protein 1	IQSEC1	175730000	215420000	175090000	33483000	27590000	25258000	115200000	64634000	103520000	19219000	0	17323000
Q9P2T1-2;Q9P2T1;H0YNJ6;A0A087WWM4;Q9P2T1-3;F8WAN9;H0YLV5;H0YMB3;H0YN22;H0YK13;H0YNH0;H0YMV5;H0YLB8;H0YNS9;H0YK71;H0YMW6;H0YMR9;H0YKE1;H0YN74;H0YKK3;H0YMG3;A0A0B4J281;H0YL68	GMP reductase 2;GMP reductase	GMPR2	615390000	595140000	523350000	709940000	814070000	784300000	583130000	594350000	643000000	560200000	519460000	593960000
E7EQL6;A0A087WWM6;O43272-2;O43272-1;O43272	Proline dehydrogenase 1, mitochondrial	PRODH	0	4927600	3467100	2462700	0	0	3808100	2988500	0	3492100	1552400	3321300
A0A499FJY3;A0A087WWP4;Q96T37-4;Q96T37-2;Q96T37-3;Q96T37;A0A494C001	Putative RNA-binding protein 15	RBM15	599000000	527060000	588460000	636810000	644420000	635610000	488900000	527690000	537930000	513240000	459470000	585510000
A0A087WWP8;Q5VWQ0;A0A0C4DGT8;A0A0C4DH79;Q5VWQ0-4	Round spermatid basic protein 1	RSBN1	78847000	142880000	91192000	112830000	110480000	134600000	107800000	111340000	110700000	88708000	57270000	67991000
A0A087WWS1;Q96FV9;R4GMN4;Q96FV9-2;A0A087WY84;J3KT14;J3KRD7;J3QQZ3;R4GN58	THO complex subunit 1	THOC1	747290000	806690000	673160000	581680000	592030000	613630000	849830000	772550000	846180000	613890000	653590000	623240000
A0A087WWU1;Q96Q45-2;Q96Q45;Q96Q45-5;Q96Q45-3	Transmembrane protein 237	TMEM237	18092000	0	13729000	0	0	0	0	0	0	0	0	0
A0A087WWW8;Q9Y6J0-2;Q9Y6J0;B5MEB3;C9JT60;C9J068	Calcineurin-binding protein cabin-1	CABIN1	45151000	51625000	49610000	52761000	51188000	44758000	50532000	41057000	36066000	48704000	0	0
A0A087WXB8;Q9Y274;C9J480;C9IZL6;C9J0E2;C9JXM2;C9JWJ3;C9J9Y4;Q9Y274-2;C9JWI9;C9JMW7	Type 2 lactosamine alpha-2,3-sialyltransferase	ST3GAL6	447390000	416220000	630120000	75473000	401860000	48043000	437320000	519450000	401750000	979580000	42809000	2415700000
A0A087WXC5;E7ESZ7;O95299;O95299-2;Q8N1B9;C9J6X0;H7C2W5;H7C1Y7;H7C2X4	NADH dehydrogenase [ubiquinone] 1 alpha subcomplex subunit 10, mitochondrial	NDUFA10	1765300000	1502600000	1441100000	1812500000	1785200000	1749000000	1556300000	1581000000	1493100000	1253100000	1043000000	1247900000
A0A087WXF7;A0A0C4DFW2;Q9UK53-3;Q9UK53-4;Q9UK53-5;Q9UK53-2;Q9UK53	Inhibitor of growth protein;Inhibitor of growth protein 1	ING1	24623000	0	32491000	0	0	0	0	0	0	0	37283000	0
A0A0D9SEW3;A0A087WXF8;Q9NP64-2;Q9NP64-3;Q9NP64;A0A087WXU5;A0A087WYV3;A0A087WYF0	Nucleolar protein of 40 kDa	ZCCHC17	28356000	24575000	30694000	30438000	25174000	25925000	27402000	28475000	29088000	26859000	0	25236000
A0A087WXI5;P12830-2;P12830;A0A087WX17;A0A087WU43;P22223	Cadherin-1;E-Cad/CTF1;E-Cad/CTF2;E-Cad/CTF3	CDH1	457860000	483070000	476390000	306430000	306280000	249000000	616320000	580350000	669300000	536970000	565380000	607490000
A0A087WXK8;Q9H4H8-2;Q9H4H8	Protein FAM83D	FAM83D	32299000	28234000	30320000	18082000	13533000	13010000	35179000	29060000	38045000	40060000	0	35409000
A0A087WXL6;Q9H270;B7Z879;A0A0G2JS92;A0A087X2J4	Vacuolar protein sorting-associated protein 11 homolog	VPS11	1004300000	1032800000	908410000	1158100000	1137800000	1119300000	1040300000	904010000	969390000	918750000	1139100000	1024200000
A0A087WXM6;J3QQT2;J3KRX5;A0A0A6YYL6;P18621;P18621-3;J3QLC8;A0A0A0MRF8;P18621-2;J3KRB3;A0A087WWH0;J3QS96;A0A087WY81;J3KSJ0	60S ribosomal protein L17	RPL17;RPL17-C18orf32	13394000000	11622000000	13389000000	12720000000	12730000000	11542000000	10138000000	12010000000	11269000000	11074000000	9619100000	9534600000
A0A087WXP3;E9PEE8;P18564-2;P18564	Integrin beta;Integrin beta-6	ITGB6	439230000	305800000	510720000	869810000	959570000	829460000	276220000	384260000	301560000	704770000	733680000	680950000
Q5TBB1;A0A2R8Y459;A0A2R8YEH2;A0A2R8Y6Y1;A0A2R8YGP2;A0A2R8Y6Q6;A0A2R8YCJ4;A0A087WZJ6;A0A2R8Y761;A0A087WXR7;A0A2R8YCX2;A0A2R8Y7Q3;A0A2R8Y883;A0A2R8Y6M7;A0A2R8YCP1;A0A2R8YE60;A0A2R8Y687;A0A2R8Y4S2;A0A2R8YEC1;A0A2R8Y7R8;Q5TBB1-2;A0A2R8YEU9	Ribonuclease H2 subunit B	RNASEH2B	9521900	13316000	8772600	4355200	3428200	4127000	9168800	7352700	12929000	0	0	9520800
O43681;A0A087WXS7;K7ERW9	ATPase ASNA1	ASNA1	709860000	639790000	640770000	1745800000	1917900000	1805600000	713160000	599210000	616450000	1263100000	1586600000	1483200000
A0A087WXU0;Q9NWS8;A0A2R8Y4J4;Q9NWS8-2;Q5SZ82;A0A2R8Y4P5;A0A2R8YFC3	Required for meiotic nuclear division protein 1 homolog	RMND1	365640000	328430000	381940000	378590000	340400000	351510000	377140000	386030000	380510000	365680000	454860000	387740000
A0A499FIX8;H7BXI1;A0A087WXU3;A0FGR8-2;A0FGR8;A0FGR8-6;A0FGR8-5;A0FGR8-4	Extended synaptotagmin-2	ESYT2	643290000	464140000	793850000	785030000	773190000	776820000	421300000	689110000	473660000	667420000	728100000	693170000
A0A087WXV4;P41235-5;P41235;P41235-4;P41235-6;P41235-2;P41235-7;P41235-3	Hepatocyte nuclear factor 4-alpha	HNF4A	412820000	411860000	417710000	7640300	31696000	4914200	495580000	537400000	580090000	89315000	76911000	90809000
A0A087WXX9;P54646	5-AMP-activated protein kinase catalytic subunit alpha-2	PRKAA2	0	0	0	0	0	0	0	0	0	26678000	23247000	28400000
A0A087WY00;G3V394;F8WE88;F8W6H6;Q9Y4I1-2;Q9Y4I1;Q9Y4I1-3;E7ERV5;G3V3C9;H0YM93;Q9UES5;O95317;H0YMK3	Unconventional myosin-Va	MYO5A	451180000	367790000	672430000	743300000	693880000	831930000	365140000	307360000	367170000	647150000	459690000	492180000
A0A087WY55;Q9NP79;Q5TGM0;Q9NP79-2	Vacuolar protein sorting-associated protein VTA1 homolog	VTA1	1112500000	1155400000	1030000000	1024000000	1068300000	1048900000	1082800000	1100700000	1168800000	1117200000	1196300000	1063600000
H7BXT3;A0A087WZR0;A0A087WY68;P29122-5;P29122-4;P29122-2;P29122-8;P29122;P29122-7;H0Y3Q0;P29122-3;P29122-6	Proprotein convertase subtilisin/kexin type 6	PCSK6	3943900	3924800	0	5565500	0	0	0	0	7333200	5415000	5096600	6848800
A0A087WY71;Q96CW1-2;Q96CW1;E9PFW3;C9JJ47;C9JGT8;C9JJD3;C9JTK4;C9JPV8;H7C4C3	AP-2 complex subunit mu	AP2M1	1540400000	1532400000	1795300000	2099800000	1978200000	2079400000	1639000000	1662700000	1707300000	1694900000	1614400000	1590900000
P61077-3;P61077;A0A087WY85;D6RAH7;P61077-2;H9KV45;P62837-2;D6RFM0;D6RA11;C9J9H9;D6R933;A0A087WW00;D6R9F6;D6RAW0;D6R980;D6RGD0;Q9Y2X8;P51668;D6RIZ3	Ubiquitin-conjugating enzyme E2 D3;Ubiquitin-conjugating enzyme E2 D2	UBE2D3;UBE2D2	1590800000	1374900000	1267200000	777290000	819530000	812630000	1305300000	1154500000	1274600000	1070500000	1461500000	1093500000
A0A087WYN0;A0A087WY96;P31641;C9JPV1;P31641-2	Transporter;Sodium- and chloride-dependent taurine transporter	SLC6A6	14270000	17122000	11688000	19649000	15501000	15308000	8974200	14499000	11187000	8944900	0	8639800
A0A087WYC8;Q9BZI7-2;Q9BZI7	Regulator of nonsense transcripts 3B	UPF3B	139290000	115340000	155470000	194970000	174880000	207180000	85381000	156410000	108210000	181730000	184130000	156350000
A0A2U3TZH4;A0A087WYF8;Q53GG5-2;Q53GG5	PDZ and LIM domain protein 3	PDLIM3	0	0	0	0	0	0	0	0	0	0	0	18793000
C9IYS7;A0A087WYI0;Q5TA45-2;Q5TA45-4;Q5TA45-3;Q5TA45;Q5TA45-5;J3QRY6;Q96HV7;E9PNH9;E9PI75;E9PIG1;E9PNS4;C9J979	Integrator complex subunit 11	CPSF3L	47197000	60337000	76996000	0	61460000	60146000	57591000	42530000	65471000	61605000	73432000	62858000
Q6UXD5-2;Q6UXD5-3;Q6UXD5-5;A0A087WYL5;Q6UXD5;Q6UXD5-6;Q6UXD5-4;H3BN26;Q9BYH1-6;B0QYH5;B7ZLJ8;Q9BYH1-5;Q9BYH1-7;Q9BYH1-4;B0QYH4;Q9BYH1-3;Q9BYH1-2;Q9BYH1	Seizure 6-like protein 2	SEZ6L2	91777000	100900000	60465000	146830000	131710000	75205000	68224000	105000000	136620000	25080000	70352000	38271000
G3V4A5;A0A087WYL7;O75586;O75586-2;O75586-3	Mediator of RNA polymerase II transcription subunit 6	MED6	115380000	98814000	113800000	172470000	194560000	229160000	83921000	95318000	85423000	104220000	146990000	91661000
A0A087WYN9;Q7Z478	ATP-dependent RNA helicase DHX29	DHX29	123250000	75061000	83120000	69335000	76379000	89835000	80803000	121270000	87061000	121610000	59331000	76098000
A0A087WYP2;Q8IZQ5;H0YE28;H3BV83	Selenoprotein H	C11orf31;SELH	279240000	235400000	302830000	1281700000	1350600000	1230500000	228310000	309500000	239150000	1122300000	955980000	1260000000
A0A087WYR0;P09132;A0A087WWU9;D6RBG4;A0A2R8Y4M3;A0A2U3TZN1;P09132-2	Signal recognition particle 19 kDa protein	SRP19	267960000	236460000	263270000	347140000	337230000	343250000	215350000	268630000	228030000	361150000	337040000	359970000
A0A087WYT3;Q15185-4;Q15185;Q15185-3;B4DDC6;Q15185-2	Prostaglandin E synthase 3	PTGES3	14663000000	13795000000	14897000000	11729000000	11340000000	11682000000	15690000000	15557000000	17111000000	14648000000	15198000000	11777000000
H3BS73;H3BRT2;H3BQ55;H3BNT3;H3BNB2;H3BMF3;A0A087WYU2;Q96S19-3;Q96S19-5;Q96S19-2;Q96S19-6;Q96S19;Q96S19-4	UPF0585 protein C16orf13	C16orf13	16224000	0	15526000	38797000	41965000	45206000	0	26771000	0	41808000	27350000	40005000
A0A087WYY3;A0A2R8Y635;A0A2R8YDN7;Q9H7F0-2;Q9H7F0;H7C1U7	Probable cation-transporting ATPase 13A3	ATP13A3	68438000	55762000	57958000	41853000	0	30262000	50257000	53183000	57523000	0	0	87706000
A0A087WZ09;P43694;P43694-2;B3KUF4;E9PKS4;Q9BWX5;P23771;P23771-2;Q92908-2;P23769-2;P23769;Q92908	Transcription factor GATA-4	GATA4	183480000	123560000	183990000	38923000	13162000	16993000	110660000	221530000	101620000	54606000	0	50158000
A0A087WZ13;E9PAU2;Q8IY67-2;Q8IY67;K7EQG2;K7EKR9;Q8IY67-3	Ribonucleoprotein PTB-binding 1	RAVER1	1132900000	1023600000	1059800000	1044700000	969660000	1146000000	1142300000	1125300000	1160000000	905030000	1004400000	949890000
A0A087WZ50;Q8TCT7-2;Q8TCT7-4;Q8TCT7;A0A087WZ93	Signal peptide peptidase-like 2B	SPPL2B	11488000	11062000	12241000	12260000	12644000	9070100	10548000	11230000	0	0	16828000	10808000
H0YCW6;A0A087WZ62;Q9H6U8-2;Q9H6U8-4;Q9H6U8;Q9H6U8-3	Alpha-1,2-mannosyltransferase ALG9	ALG9	24720000	26708000	31947000	39453000	29248000	27246000	36020000	32339000	29271000	32305000	42933000	39918000
A0A087X2C2;A0A087WZ97;Q5T7M9;A0A087WZK6;Q5T7M9-2	Protein FAM69A	FAM69A	211390000	153490000	262120000	414230000	443490000	341960000	231770000	317810000	379970000	345010000	158850000	0
A0A087WZB5;Q9HBI1-3;Q9HBI1;Q9HBI1-2;B0QYP8	Beta-parvin	PARVB	7394200	0	6450900	0	0	0	10338000	11293000	20786000	0	0	0
E0YMJ8;A0A087WZC2;P35680-3;P35680;A0A0C4DGS8;P35680-2;A0A087WXS2;E5RGZ2;H0YKJ1;Q6NT76-2;Q6NT76-3;Q6NT76;P35680-4;Q6NT76-5	Hepatocyte nuclear factor 1-beta	HNF1B	20932000	0	16232000	0	0	0	17649000	23743000	26269000	28820000	0	0
A0A087WZL9;Q9H582-2;Q9H582	Zinc finger protein 644	ZNF644	0	4155000	5117200	0	0	0	0	3522800	3462000	3590000	0	3569700
H0YAE9;D6RHI9;A0A087WZM2;O00584;D6REQ6;J3QQ64;A0A087WWI1;O00584-2	Ribonuclease T2	RNASET2	51967000	50232000	39766000	54383000	43097000	38789000	70779000	50550000	53536000	79107000	0	61962000
A0A087WZN1;O43837;A0A087X2E5;O43837-2;O43837-3;A0A0D9SG66	Isocitrate dehydrogenase [NAD] subunit, mitochondrial;Isocitrate dehydrogenase [NAD] subunit beta, mitochondrial	IDH3B	1375100000	1304200000	1329800000	2028300000	2177300000	2176400000	1191000000	1321300000	1231700000	1428700000	1424000000	1342400000
A0A087WZQ7;Q9H115-3;Q9H115-2;Q9H115	Beta-soluble NSF attachment protein	NAPB	0	13802000	0	17843000	29981000	0	0	0	0	19305000	0	23785000
A0A087WZT2;Q6UX53	Methyltransferase-like protein 7B	METTL7B	506490000	326960000	527390000	251240000	320760000	249800000	228740000	359850000	282190000	222950000	270520000	186900000
A0A087WZU2;Q00536;Q00536-3;Q00536-2;E5RGN0;H0YAZ9;D6RA44;A0A0A0MSJ6;H0YBX5;E5RJM2	Cyclin-dependent kinase 16	CDK16	16971000	21139000	20505000	43517000	54630000	39689000	18172000	22794000	23550000	42266000	37063000	35778000
O43657;A0A087WZU5;A0A087WYV6	Tetraspanin-6	TSPAN6	342570000	354130000	380050000	418810000	548050000	482600000	530440000	487190000	551470000	281330000	277650000	258620000
A0A087WZV0;O43314-2;O43314;D6RBU4;A0A087WWN8;D6RFG4;H0Y9M0;K7EPT7	Inositol hexakisphosphate and diphosphoinositol-pentakisphosphate kinase 2	PPIP5K2	479130000	356660000	453190000	171860000	190820000	194410000	288110000	376660000	319730000	272000000	119500000	228700000
A0A087WZX0;Q86UU0-3;Q86UU0-4;Q86UU0-2;Q86UU0;E9PNR0	B-cell CLL/lymphoma 9-like protein	BCL9L	1811800	2428900	1735900	3753800	7113700	9921100	1726500	1716300	3181100	2262500	0	1547700
A0A087WZX2;O95139;O95139-2	NADH dehydrogenase [ubiquinone] 1 beta subcomplex subunit 6	NDUFB6	97796000	77487000	85690000	61085000	61003000	0	0	0	0	0	0	43789000
J3KPF9;A0A087X011;E9PES4;Q9Y496;H7C2F6;C9J9X2	Kinesin-like protein;Kinesin-like protein KIF3A	KIF3A	55697000	39252000	52254000	143890000	127710000	145380000	68846000	45094000	87532000	110840000	98426000	86331000
Q9Y3A5;A0A087X020;F8WE72	Ribosome maturation protein SBDS	SBDS	2175700000	1726700000	2210900000	2097700000	2335800000	2296900000	1406900000	1883600000	1646900000	1394700000	1487300000	1611100000
A0A087X038;A8K727;Q9HB19;A0A087WZ32;E5RGP3;E5RHB5	Pleckstrin homology domain-containing family A member 2	PLEKHA2	29244000	36029000	43099000	24921000	31125000	29233000	51376000	39740000	42496000	21470000	0	28074000
G3V2W9;A0A087X060;Q56P03	E2F-associated phosphoprotein	EAPP	71694000	76585000	71998000	50254000	60731000	39000000	71152000	63315000	73778000	60226000	65257000	94603000
P09668;A0A087X0D5;E9PKT6	Pro-cathepsin H;Cathepsin H mini chain;Cathepsin H;Cathepsin H heavy chain;Cathepsin H light chain	CTSH	13771000	0	47124000	16825000	25692000	20460000	0	31891000	29789000	0	0	18894000
A0A087X0H9;Q5T8P6-3;Q5T8P6-5;Q5T8P6-4;E2PSN0;Q5T8P6-6	RNA-binding protein 26	RBM26	212660000	195550000	218370000	208960000	158520000	162310000	162720000	204120000	197320000	237310000	203730000	181930000
A0A087X0K9;G5E9E7;Q07157-2;H0Y3R8;H0YKB1;H0YLT6	Tight junction protein ZO-1	TJP1	0	0	0	0	0	0	0	0	0	0	0	17619000
A0A087X0L7;J3KNA0;Q15070-2;Q15070;E7EVY0;C9JC63;Q15070-3	Mitochondrial inner membrane protein OXA1L	OXA1L	227330000	219310000	243100000	119580000	132640000	83853000	258920000	270820000	231690000	130180000	104400000	124510000
A0A087X0M4;Q9BWU0;A0A087WWF4;H7C256	Kanadaptin	SLC4A1AP	802940000	757730000	768320000	660530000	684000000	620920000	688670000	693690000	736590000	787240000	886170000	792530000
A0A087X0N3;Q96MY1;A0A087WTU5;O94818-4;Q96MY1-2;O94818-3;O94818;K7EQ17;O94818-2	Nucleolar protein 4-like;Nucleolar protein 4	NOL4L;NOL4	21395000	23365000	31986000	36968000	0	30529000	100680000	0	92242000	36398000	58726000	40650000
A0A087X0Q9;Q9BVL4	Selenoprotein O	SELO	154550000	175460000	181650000	151110000	153230000	141830000	172950000	196470000	191140000	148840000	133720000	130310000
F5H6S1;F8W8R6;A0A087X0R0;O15550;H0Y6V5;H0Y6I7;H0Y5J3;F5H5V6	Lysine-specific demethylase 6A	KDM6A	0	11449000	0	0	0	0	15108000	17851000	15590000	0	0	0
A0A087X0R6;Q9UMY4-2;Q9UMY4;Q9UMY4-3	Sorting nexin-12	SNX12	147310000	140910000	153280000	260400000	260750000	253610000	145480000	133760000	132470000	169730000	200660000	201980000
A0A087X0S5;P12109	Collagen alpha-1(VI) chain	COL6A1	168720000	129170000	161840000	371520000	346440000	382400000	130910000	117960000	157390000	145000000	160290000	140980000
A0A087X0V5;P29728-2;P29728;F8W1C5;P29728-3	2-5-oligoadenylate synthase 2	OAS2	0	0	0	499720000	562670000	535840000	0	0	0	421210000	593810000	478290000
A0A087X0W9;Q8N6M0;Q8N6M0-2;A0A0C4DH76	OTU domain-containing protein 6B	OTUD6B	63231000	67788000	66848000	114440000	93007000	107490000	106250000	95594000	89584000	60244000	83907000	112290000
A0A0G2JN29;A0A087X117;Q15155;A0A0G2JP90;A0A087WW46;H3BUC9;H3BPS9;I3L0Q6;H3BTW1	Nodal modulator 1	NOMO1	3683700	2053200	2656000	4803200	2991100	0	0	0	0	0	0	0
A0A087X142;A6NMH6;A6NFQ9;F8W8I8;Q92599-2;Q92599-4;Q92599;Q92599-3;C9JV02;C9J4G8;A0A0A0MRP8	Septin-8	2008-09-01	244950000	265830000	269690000	449900000	451270000	421820000	211610000	210880000	246170000	246800000	354870000	347260000
D3VVH9;P54252-4;F5H211;P54252-1;P54252;A0A2R8Y3X7;G3V3R7;A0A087X1A8;C9JQV6;G3V4U9;A0A087WXY4;P54252-3;A0A0A0MS38;G3V328;G3V2G1;G3V3T6;G3V2G2;G3V526;P54252-5;E9PJN5;S4R399;G3V4F4;G3V4F5;G3V5H3;A0A2R8Y888;D3VVP3;G3V3S5;G3V390;G3V4B1;D6R9I5;G3V3T0;G3V3A6	Ataxin-3	ATXN3	33981000	33502000	32728000	36164000	45357000	0	43471000	37564000	32370000	35052000	31227000	0
A0A087X1E4;P53365;P53365-3;P53365-2;E9PRV8;E9PPY7	Arfaptin-2	ARFIP2	374640000	462480000	364300000	270660000	309940000	276470000	418650000	408630000	449820000	315070000	274390000	286740000
A0A087X1G7;O60613;A0A3B3IT39;A0A0J9YX89;A0A087WXL0;A0A0B4J1T0;A8MZD0;O60613-2	15 kDa selenoprotein	2015-09-01	145870000	147340000	129940000	221160000	217590000	262560000	198240000	153560000	160020000	249640000	212700000	237370000
A0A087X1H5;Q15057;A0A0U1RQT1;H7C3Q8;H7C3K3;F8WAU0;C9J8L1	Arf-GAP with coiled-coil, ANK repeat and PH domain-containing protein 2	ACAP2	235350000	251200000	252310000	215130000	289140000	310410000	275300000	291910000	320670000	242000000	135640000	295790000
A0A087X1Z5;A0A087X1K1;Q96C00	Zinc finger and BTB domain-containing protein 9	ZBTB9	170450000	148350000	172220000	87732000	836650000	729620000	110610000	125910000	78940000	83928000	0	719670000
H7BYR4;F8W8P5;C9IYE1;A0A087X1P3;Q86UW7-3;Q86UW7-2;Q86UW7;H0Y8B5	Calcium-dependent secretion activator 2	CADPS2	23791000	28269000	18454000	6316900	0	0	26700000	27466000	25672000	0	0	0
A0A0G2JQX1;A0A0G2JPW5;A0A0G2JSA7;A0A087X1Z1;Q96RT8-2;Q96RT8;A0A0G2JQI0;A0A0G2JQK2;A0A087WVL9	Gamma-tubulin complex component 5	TUBGCP5	24495000	22023000	22692000	39198000	0	0	13445000	20895000	22172000	0	0	0
A0A087X1Z3;Q9UL46;H0YM70;H0YKU2	Proteasome activator complex subunit 2	PSME2	9461500000	10009000000	10033000000	31911000000	33962000000	34125000000	10352000000	9791000000	9760900000	37502000000	37597000000	37237000000
A0A087X211;Q8TCG1;Q8TCG1-2;F8WAX6;F8WF26	Protein CIP2A	KIAA1524	383810000	443800000	414650000	196360000	210340000	230880000	376990000	340270000	366680000	317580000	281110000	244890000
A0A087X232;P09871;F8WCZ6;H0Y5D1;F5H7T4;B5MCV4	Complement C1s subcomponent;Complement C1s subcomponent heavy chain;Complement C1s subcomponent light chain	C1S	0	0	0	274920000	293610000	352070000	0	0	0	0	0	0
A0A087X256;Q2M389;Q2M389-2;F8VYH7;F8W1W1;F8VNZ5	WASH complex subunit 7	KIAA1033	883540000	879810000	833810000	952740000	856830000	955470000	1016800000	973910000	1043600000	1054700000	1021700000	949460000
A0A087X259;J3KT13;P35227	Polycomb group RING finger protein 2	PCGF2	12747000	13522000	0	0	0	0	0	0	0	0	13407000	8039700
A0A087X279;P09913	Interferon-induced protein with tetratricopeptide repeats 2	IFIT2	13366000	8675600	10291000	1857300000	2023400000	237540000	7605400	7600200	10417000	868220000	785880000	217080000
E9PDU5;A0A087X295;Q9NNW5;E9PBK6;Q6PKC6;C9K020;C9JFP6;V9GYU1;V9GZ65	WD repeat-containing protein 6	WDR6	2206000000	2494500000	2420000000	1763500000	1782700000	1702200000	2706700000	2462200000	2813400000	1914800000	2006000000	1716700000
A0A087X2B2;E9PMH5;Q13490-2;Q13490;E9PIW1;E9PI77;H0YDY3;Q13489	Baculoviral IAP repeat-containing protein 2	BIRC2	18038000	23815000	22544000	9632500	0	0	21936000	0	21416000	17704000	0	0
A0A087X2D5;Q9BRJ2;A0A0G2JMS5;A0A087WU62	39S ribosomal protein L45, mitochondrial	MRPL45	441620000	449720000	367170000	297990000	358400000	295720000	422070000	414790000	414150000	240330000	291910000	311700000
D6RIC3;A0A0C4DGU5;A0A087X2G6;Q9Y3C1;Q9Y3C1-3;Q9Y3C1-2;D6RC60	Nucleolar protein 16	NOP16	384020000	384530000	341770000	357150000	317240000	291410000	314260000	371730000	349520000	328050000	267720000	235150000
A0A087X2H0;Q99728-3;Q99728-2;Q99728	BRCA1-associated RING domain protein 1	BARD1	15824000	18029000	25757000	0	0	0	0	26290000	16579000	39010000	25066000	0
A0A087X2H1;Q9ULT8;G3V4V5;H0YJP0;H0YJD4;A0A087WVU6	E3 ubiquitin-protein ligase HECTD1	HECTD1	817370000	832540000	827250000	899240000	888690000	987570000	881320000	859110000	857400000	754740000	730010000	736190000
A0A087X2I1;P62333;H0YJC0;H0YJS8;H0YJX2;H0YJE9;H0YJT1	26S protease regulatory subunit 10B	PSMC6	3829900000	4392400000	3687700000	5337300000	5075100000	5643600000	4814200000	3876700000	4585600000	5297200000	6804900000	5329600000
A0A087X2I5;Q9UK45	U6 snRNA-associated Sm-like protein LSm7	LSM7	424450000	369170000	339560000	297380000	267300000	294820000	409890000	454840000	442120000	346420000	381650000	328380000
A0A088AWN3;A0A0A0MSY4;Q9BZ29-3;Q9BZ29-5;Q9BZ29;Q9BZ29-4;A0A0A0MT38;Q6ZSL5;Q9BZ29-6;A0A0D9SFH5;Q5JUD3;H7BZ79;Q5JUD8;H0Y3S1	Dedicator of cytokinesis protein 9	DOCK9	34967000	28354000	27788000	32222000	23022000	29971000	25571000	34445000	40368000	31007000	29403000	0
E7EP87;A0A088AWN8;Q9UHQ1-3;Q9UHQ1;Q9UHQ1-2;Q9UHQ1-4;J3KS48;J3KT43;E9PH27;J3QRB0;J3KTP5;J3KTG5;J3KRH7	Nuclear prelamin A recognition factor	NARF	29929000	35344000	48089000	0	0	0	49522000	39265000	41969000	0	0	0
A0A494C0S2;A0A090HNM7;A0A1W2PS85;R4GMW8;P28715	DNA repair protein complementing XP-G cells	ERCC5-201;BIVM-ERCC5;ERCC5	0	10697000	0	0	0	0	0	10052000	0	0	0	0
A0A096LNH6;Q14185	Dedicator of cytokinesis protein 1	DOCK1	68888000	63606000	75564000	76378000	55103000	49010000	66124000	69655000	72757000	83697000	79043000	58922000
A0A096LNQ4;A0A096LNK4;O43307-3		ARHGEF9	26444000	27210000	43208000	0	0	0	41571000	46283000	45429000	0	0	0
A0A096LP22;Q86Y79	Probable peptidyl-tRNA hydrolase	PTRH1	14805000	7469200	8851000	15726000	28254000	25517000	0	15812000	10968000	24865000	30830000	23925000
A0A096LP25;Q6ZSR9;A0A096LNZ0	Uncharacterized protein FLJ45252	AAK1	189950000	136520000	181860000	314360000	364180000	377730000	115980000	122230000	197730000	209370000	284200000	287020000
A0A096LP69		CD99	2537900	1075000	1418600	0	0	0	1235400	2887600	2820900	2298800	0	0
A0A096LPI6;A0A096LNH5;H7C1F6;H7C2G3;A0A096LP73;A0A2R8YDR7;A0A096LNJ1		C21orf33	1227200000	1134300000	1133500000	1397500000	1196200000	1603400000	1595000000	1402000000	1551800000	1492600000	1570300000	1389600000
A0A0A0MQR2;Q9BY42;A2A2L5;A2A2L6	Protein RTF2 homolog	RTFDC1	224440000	183780000	154060000	169230000	110920000	85795000	177830000	165060000	195820000	148510000	93449000	103660000
A0A0A0MQS1;Q53H96-2;Q53H96;B5MD87;F8WEI0	Pyrroline-5-carboxylate reductase;Pyrroline-5-carboxylate reductase 3	PYCRL	407690000	394560000	515720000	392990000	346500000	343740000	410930000	382470000	541920000	370230000	387570000	353820000
F5H0Q6;A0A0A0MQS2;Q8N2M8-4;Q8N2M8;Q8N2M8-3;K7EP11	CLK4-associating serine/arginine rich protein	CLASRP	28918000	23850000	14696000	32537000	21746000	26723000	28447000	21170000	23873000	23030000	0	18659000
A0A0A0MTB9;H0YAK8;A0A0A0MQT0;P09455;P09455-2;P09455-3	Retinol-binding protein 1	RBP1	32923000	36275000	34879000	25929000	0	0	0	38440000	38579000	26432000	0	0
U3KQS6;A0A0A0MQU7;F5H0K0;A0A0A0MTK8;P20823-3;P20823-2;P20823;P20823-7;H0YND5;P20823-5;P20823-6;E0YMI9;A0A087WYP0;P20823-4;P20823-8	Hepatocyte nuclear factor 1-alpha	HNF1A	232200000	245720000	236260000	123800000	132050000	164170000	265580000	229140000	252950000	178530000	172180000	205040000
A0A0A0MQX2;Q9HD23-2;Q9HD23;Q9HD23-4	Magnesium transporter MRS2 homolog, mitochondrial	MRS2	12296000	10803000	14346000	0	0	0	18541000	21494000	12014000	0	0	0
C9JP00;A0A0A0MQX8;Q9NR56;H7C4T5;Q9NR56-7;Q9NR56-6;Q9NR56-2;Q9NR56-5;Q86VM6;Q9NR56-3;Q9NR56-4;C9JCX1;H7C4Y1	Muscleblind-like protein 1	MBNL1	69068000	71732000	57703000	63076000	71414000	78985000	77875000	75501000	64250000	86027000	109230000	83271000
F2Z357;A0A0A0MQY8;J3KPC5;X6R8W7;P47736;P47736-2;P47736-4;P47736-3;A0A1B0GV05;Q684P5-3;Q684P5-2;Q684P5	Rap1 GTPase-activating protein 1	RAP1GAP	48486000	19182000	15424000	0	19451000	0	107410000	121440000	151560000	21977000	23689000	22457000
A0A0A0MR04;B4DI03;K7EJQ7;Q9BY50	Signal peptidase complex catalytic subunit SEC11;Signal peptidase complex catalytic subunit SEC11C	SEC11C;SEC11L3	70367000	50402000	94697000	26363000	43267000	41937000	49782000	69399000	60393000	55066000	0	54007000
A0A0A0MR09;P43378	Protein-tyrosine-phosphatase;Tyrosine-protein phosphatase non-receptor type 9	PTPN9	40401000	35856000	37396000	35096000	32065000	35440000	31741000	22012000	28619000	30928000	0	39923000
C9JWZ1;A0A0A0MR27;J3QT39;Q49A88-4;Q49A88-2;Q49A88-3;Q49A88-6;Q49A88	Coiled-coil domain-containing protein 14	CCDC14	4474200	3827200	3362900	4882800	6081700	6473100	3901900	4496200	2844600	5916300	5062900	5374000
A0A0A0MR33;G3V5T0;A0A0C4DFM0;G3V267;G3V4T6;O43708-3;O43708;G3V3B9;O43708-2	Maleylacetoacetate isomerase	GSTZ1	205010000	226560000	226120000	403570000	522600000	524720000	219350000	245970000	205870000	370740000	0	355420000
A0A0A0MR36;Q9ULV0-2	Unconventional myosin-Vb	MYO5B	0	0	0	18263000	0	20408000	0	21467000	16854000	0	0	0
A0A0A0MR39;Q9P2K5;A0A087WUT0;A0A0A0MQW0;Q9P2K5-2;H0YN19;H0YKS1;A0A0C4DGV1;Q9P2K5-3;A0A087WWC8;Q9P2K5-4	Myelin expression factor 2	MYEF2	80051000	95343000	79649000	141350000	156920000	120830000	89501000	0	72326000	217070000	315790000	182050000
A0A0A0MR85;Q03013;Q03013-2;Q03013-3;A6NNT0	Glutathione S-transferase Mu 4	GSTM4	243890000	259040000	303910000	212150000	255180000	342070000	428750000	410200000	400910000	434890000	407760000	272900000
K7ELZ7;A0A0C4DH11;A0A0A0MR93;Q53F39-4;Q53F39-2;Q53F39-3;Q53F39	Metallophosphoesterase 1	MPPE1	0	616420	0	9835300	10629000	13454000	0	0	0	0	0	2841800
A0A0A0MRB5;Q8WXG6-6;Q8WXG6-8;Q8WXG6-5;Q8WXG6-4;Q8WXG6-7;Q8WXG6-3;Q8WXG6-2;Q8WXG6;C9JM97;C9JLZ9;C9K0L0	MAP kinase-activating death domain protein	MADD	17897000	24511000	0	0	0	0	0	0	0	0	0	0
H0YBF7;A0A0A0MRE5;Q9ULH1;Q9ULH1-2;H0YBM4	Arf-GAP with SH3 domain, ANK repeat and PH domain-containing protein 1	ASAP1	53718000	30571000	34393000	39204000	39832000	45550000	41776000	41212000	36036000	52093000	50800000	41334000
A0A0A0MRF3;Q53GI4;Q15561-3;Q15561;H0YGS2;H0YG62;Q15561-2;Q15562;Q15562-2;Q15562-4	Transcriptional enhancer factor TEF-3;Transcriptional enhancer factor TEF-4	TEAD4;TEAD2	13493000	12262000	0	0	24528000	15192000	0	0	0	12992000	33024000	0
A0A0A0MRG8;Q16611-2;Q16611	Bcl-2 homologous antagonist/killer	BAK1	33554000	40854000	50095000	98353000	67322000	145350000	31877000	68052000	40441000	49132000	0	0
A0A0A0MRG9;Q96SN8-4;Q96SN8-3;Q96SN8-2;Q96SN8;B1AMJ5;C9K0C9;F8WF55;Q5JTU8	CDK5 regulatory subunit-associated protein 2	CDK5RAP2	12180000	16088000	15890000	12460000	15513000	15521000	14842000	12763000	18573000	16500000	0	8908500
A0A0A0MRI1;Q8IXQ4;A0A087WW86;Q8IXQ4-3;Q8IXQ4-4;Q8IXQ4-2	GPALPP motifs-containing protein 1	GPALPP1	24489000	24683000	22992000	30686000	23516000	22561000	19683000	29683000	29663000	32367000	23651000	22772000
A0A0A0MRJ0;Q5VT25-3;Q5VT25-4;Q5VT25-5;Q5VT25;Q5VT25-2;Q5VT25-6;H0Y5V1;A0A0A0MRJ1;H0Y7V8;H0Y6V3;H0Y6R0	Non-specific serine/threonine protein kinase;Serine/threonine-protein kinase MRCK alpha	CDC42BPA	142290000	142450000	150670000	174360000	170470000	174700000	164010000	169800000	161600000	189990000	182230000	208850000
A0A0A0MRJ2;Q5VTZ4;P18847-5;P18847	Cyclic AMP-dependent transcription factor ATF-3	ATF3	0	0	0	0	0	27918000	0	0	0	0	0	0
A0A0A0MRJ6;H7BY58;P22061;P22061-2;F6S8N6;A0A3F2YNX8;F8WDT3;F8WAV5;F8WAX2;C9J0F2;H7C4X2	Protein-L-isoaspartate O-methyltransferase;Protein-L-isoaspartate(D-aspartate) O-methyltransferase	PCMT1	2003900000	2427600000	1931300000	1732000000	1312100000	1280800000	2037000000	1903300000	2047200000	1883300000	1377400000	1740400000
A0A0A0MRJ7;P12259	Coagulation factor V;Coagulation factor V heavy chain;Coagulation factor V light chain	F5	0	0	0	0	0	0	0	0	6133800	0	0	0
F8W8M4;A0A0A0MRL6;A0A3B3IS55;O14639-2;O14639-6;O14639;O14639-3;O14639-5;J3QSX6;O14639-4;A0A494C1G0;A0A494C1P1;H0Y7N6;F6XFR5	Actin-binding LIM protein 1	ABLIM1	242010000	221540000	262960000	347030000	315160000	369940000	211550000	201010000	234490000	287170000	323660000	286920000
A0A0A0MRM8;Q9UM54-6;E7EW20;Q9UM54-5;Q9UM54-2;Q9UM54-4;Q9UM54-1;Q9UM54	Unconventional myosin-VI	MYO6	3811000000	3545400000	3769400000	5621100000	5966900000	5707900000	3731700000	4527600000	4273200000	4892700000	4038000000	4525800000
A0A0A0MRM9;Q14978-2;Q14978;S4R349;S4R402;S4R3C2	Nucleolar and coiled-body phosphoprotein 1	NOLC1	3895500000	3322000000	2996600000	2375100000	2217700000	2157900000	3306000000	3722300000	3759800000	3356000000	2298900000	2501300000
A0A0A0MRP6;P28370-2	Probable global transcription activator SNF2L1	SMARCA1	26278000	0	39833000	0	0	0	0	33557000	24959000	0	0	26329000
P09234;A0A0A0MRR7;Q5TAL2	U1 small nuclear ribonucleoprotein C	SNRPC	1374300000	1374900000	1632400000	1479200000	1549400000	1608100000	1887500000	1785500000	1654100000	1623400000	2303900000	1861900000
B6VEX4;A0A0A0MRT6;Q8IZP0-10;Q8IZP0-8;Q8IZP0-7;Q8IZP0-2;Q8IZP0-4;Q8IZP0-3;Q8IZP0-5;Q8IZP0-6;Q8IZP0-9;Q8IZP0;Q8IZP0-12;Q8IZP0-11	Abl interactor 1	ABI1	1022800000	1094000000	1027300000	1016300000	1110800000	1183400000	1046100000	1052400000	1092700000	811790000	898940000	807150000
B4DZ84;D3DX48;A0A0A0MRU0;A0A0D9SFF8;D3DX49;A0A0C4DH75;Q14168-5;Q14168-6;Q14168-2;Q14168-3;Q14168;Q14168-4;E5RI47;A0A087WVY2	MAGUK p55 subfamily member 2	MPP2	55250000	61924000	47126000	74439000	88073000	78943000	34777000	46498000	49526000	88782000	84642000	101290000
E7EW15;E7EMV7;A0A0A0MRZ4;Q15025-7;Q15025-8;Q15025-5;Q15025-6;Q15025-4;Q15025-3;Q15025-2;Q15025	TNFAIP3-interacting protein 1	TNIP1	17755000	17841000	14864000	18789000	12652000	11926000	16604000	17100000	21605000	17501000	10035000	12617000
A0A0A0MS41;A0A1P0AYU5;Q9BWM7;S4R3N9	Sideroflexin;Sideroflexin-3	SFXN3	878200000	723200000	921620000	1171700000	1292900000	1107500000	1117300000	1185600000	1137900000	807550000	1004100000	735230000
A0A0A0MS45;J3KNI1;Q9H9E3;Q9H9E3-3;Q9H9E3-2;H3BMV9;E9PRT5;H3BSD2;J3KRB5;J3QLW1;H3BQB2	Conserved oligomeric Golgi complex subunit 4	COG4	588760000	703550000	695280000	763080000	792300000	694480000	630780000	724860000	730260000	687460000	710960000	644930000
P22694-2;P22694-4;A0A0A0MS54;P22694-5;P22694-6;P22694-7;P22694-9;P22694;P22694-3;A0A087WVC4;P22694-10;B1APG0;B1APG1;P22694-8;B1APG3;B1APF9;B1APF8;B1APG2;B1APF7;P22612	cAMP-dependent protein kinase catalytic subunit beta	PRKACB	1152800000	1118700000	1218600000	1159000000	1113900000	1463100000	1031900000	1075200000	1132900000	1096400000	1176900000	1223300000
A0A0A0MS70;H0Y4G9;Q99836-5;Q99836;Q99836-6;A0A0A0MSI9;Q99836-2;A0A494C0J8;A0A3F2YP85;Q99836-3;A0A3B3ITY3;Q99836-4	Myeloid differentiation primary response protein MyD88	MYD88	105020000	90894000	122330000	101480000	102930000	116760000	117830000	116770000	114270000	151690000	151930000	148290000
A0A0A0MS90;Q9UIS9-4;Q9UIS9-11;Q9UIS9-8;Q9UIS9-7;Q9UIS9-5;Q9UIS9-10;Q9UIS9;Q9UIS9-9;K7EN65;K7EPZ6;Q9UIS9-6;Q9UIS9-2;Q9UIS9-12;K7EMA9	Methyl-CpG-binding domain protein 1	MBD1	64033000	42615000	70159000	74603000	81774000	77039000	39638000	66313000	43083000	54241000	0	49318000
A0A0A0MSA7;A0A0U1RQK7;O43432;O43432-3;O43432-4;Q68DC6;O43432-2	Eukaryotic translation initiation factor 4 gamma 3	EIF4G3	427110000	449020000	459160000	501430000	614960000	602060000	430830000	513900000	467130000	540680000	523580000	481630000
A0A0A0MSA9;A0A0C4DG49;P15151-3;P15151-2;P15151-4;P15151;K7EMC6	Poliovirus receptor	PVR	966100000	981150000	958170000	1279100000	1410700000	1437300000	975470000	1014400000	1018100000	1735800000	1374100000	1455800000
A0A0A0MSB8;Q9UPT5-2;Q9UPT5-5;Q9UPT5-1;Q9UPT5-6;Q9UPT5;B4DJ07;A0A0A0MRE1;Q9UPT5-4;B5MCY9;K7ERQ5;C9JME6;C9JKC2	Exocyst complex component 7	EXOC7	582510000	608960000	544900000	705200000	769170000	806070000	598910000	588680000	613900000	594460000	655050000	586280000
A0A0A0MSC4;H7BYW6;P04085-2;P04085	Platelet-derived growth factor subunit A	PDGFA	0	0	58947000	42915000	0	0	0	48432000	36170000	0	0	0
H7C2J3;C9JGB2;A0A0A0MSD2;A0A0C4DFM4;Q96LZ7-3;Q96LZ7-4;Q96LZ7;Q96LZ7-2	Regulator of microtubule dynamics protein 2	RMDN2	19565000	18904000	18030000	24844000	20016000	9150700	0	7410500	0	6076500	0	0
A0A0A0MSE7;Q86UA6;Q86UA6-8	RPA-interacting protein	RPAIN	64104000	76335000	77658000	102780000	129720000	81576000	70944000	82106000	61073000	91305000	125140000	141730000
B3KPJ4;A0A0A0MSI2;Q8IXK0-2;Q8IXK0-4;Q8IXK0;Q8IXK0-5;Q8IXK0-3	Polyhomeotic-like protein 2	PHC2	287440000	299280000	273370000	211420000	297780000	303470000	254430000	300430000	272350000	327260000	319260000	281100000
A0A1B0GUS9;A0A0J9YY76;H0Y7L4;A0A2R8YG57;A0A0J9YWQ8;A0A0A0MSQ4;B1AK53-2;B1AK53	Espin	ESPN	23661000	22598000	20469000	0	0	0	12491000	12002000	16610000	0	0	0
A0A0G2JKZ1;A2AB90;A0A0G2JH37;A0A0A0MSV9;O15533;O15533-3;O15533-2;A0A0A0MT98;O15533-4;Q6P1N7;C9JA35;A0A140T9B2;A0A0G2JJI5	Tapasin	TAPBP	0	22135000	10264000	10743000000	14390000000	6271800000	0	666980	18224000	3773100000	2821600000	3812200000
A0A0A0MSW4;P48739;P48739-2;P48739-3;B3KYB6;B3KYB7	Phosphatidylinositol transfer protein beta isoform	PITPNB	1885700000	2151500000	1877800000	1612800000	1967100000	1847200000	2002700000	1983200000	2178700000	1588500000	1917900000	1953000000
A0A0A0MSX5;A0A0A0MTF4;P13378-2;P13378;I3L383;I3L3R1;P13378-3;P31273;P17481	Homeobox protein Hox-D8;Homeobox protein Hox-C8;Homeobox protein Hox-B8	HOXD8;HOXB8;HOXC8	0	0	0	1880200	1157700	1726500	0	0	0	0	0	0
J3QRP0;H3BP77;A0A0A0MSY7;O00142-2;O00142-4;O00142;O00142-6	Thymidine kinase 2, mitochondrial	TK2	0	0	0	0	0	0	0	0	0	0	0	0
A0A0A0MSY9;Q92800-5;Q92800-4;Q92800-3;Q92800;Q92800-2	Histone-lysine N-methyltransferase EZH1	EZH1	0	32920000	38629000	33399000	24892000	0	28780000	36163000	26579000	0	40538000	0
A0A0C4DFN8;A0A0A0MSZ4;P22570;P22570-7;A0A0A0MTN9;A0A0A0MTR6;A0A0C4DGN7;A0A0A0MT64;P22570-4;P22570-5;P22570-2;P22570-3;J3QKZ8;J3QQW7	NADPH:adrenodoxin oxidoreductase, mitochondrial	FDXR	558490000	448230000	550280000	724940000	736290000	747760000	444170000	474460000	481490000	600040000	426830000	434870000
Q5T6K7;E9PI99;A0A0A0MT00;Q5T6K5;Q13952-6;Q13952-7;Q13952-2;Q13952-5;Q13952-3;Q13952;E9PJA8;E9PQR2;E9PL11;Q13952-4	Nuclear transcription factor Y subunit gamma	NFYC	81290000	100130000	95127000	115260000	107100000	111760000	126100000	99822000	145340000	119970000	148850000	117260000
A0A0A0MT32;P38571-2;P38571;Q5T073	Lysosomal acid lipase/cholesteryl ester hydrolase	LIPA	167080000	171580000	169590000	249810000	296120000	289790000	223720000	261890000	245220000	164950000	196850000	151670000
A0A0A0MT33;Q9UPN6;Q9UPN6-2	Protein SCAF8	SCAF8	583980000	630220000	505930000	759000000	643890000	717040000	537810000	473550000	582130000	625500000	546290000	559790000
A0A0A0MT58;Q15560-2;Q15560;Q5JRI7;Q5JRI8;Q86VL0	Transcription elongation factor A protein 2	TCEA2	0	0	0	0	13842000	16614000	0	0	0	18240000	27459000	10686000
A0A0A0MT60;Q5T1M5-2;Q5T1M5;X6RKW4;Q5T1M5-3	Peptidyl-prolyl cis-trans isomerase;FK506-binding protein 15	FKBP15	636090000	743010000	612410000	1039600000	1085000000	1133200000	664500000	645290000	748130000	746790000	792920000	736280000
C9JUH3;A0A0A0MT72;Q9BSQ5-3;Q9BSQ5-4;Q9BSQ5;Q9BSQ5-2;A0A3B3IRS0;E9PEC4	Cerebral cavernous malformations 2 protein	CCM2	37612000	20398000	46323000	0	0	0	18641000	13578000	19369000	24072000	0	11519000
A0A0A0MT83;P26440;A0A0S2Z4K7;P26440-2;H0YLC3;H7C4G6;H0YN10;H0YKV0;A0A087WVD3	Isovaleryl-CoA dehydrogenase, mitochondrial	IVD	898510000	942800000	863960000	1040000000	1126600000	996440000	906310000	996480000	1000900000	856530000	824320000	899350000
A0A0A0MTB8;Q8NI36	WD repeat-containing protein 36	WDR36	962160000	954490000	1059800000	858580000	847190000	877640000	1032900000	1196300000	949920000	1018800000	1291600000	1094200000
Q9NUL3;A0A0A0MTC4;E9PH62;E7EVJ4;A0A0A0MTC6;E7EPX0;F8VPI7;A0A0A0MTD1;E5RJN7;Q9NUL3-8;Q9NUL3-6;Q9NUL3-3;Q9NUL3-7;Q9NUL3-2;G5EA18;E7EVI1;Q9NUL3-4;E5RJ67;E5RFK1;H0YBY0	Double-stranded RNA-binding protein Staufen homolog 2	STAU2	152520000	137390000	186180000	165310000	162680000	149880000	112990000	153280000	144210000	143210000	67858000	131760000
A0A0A0MTL4;A0A0A0MTE8;Q8IVL1-5;Q8IVL1-4;Q8IVL1-8;Q8IVL1-9;Q8IVL1-10;Q8IVL1-13;Q8IVL1-12;Q8IVL1-11;Q8IVL1-3;Q8IVL1-2;Q8IVL1;E9PNV5;Q8IVL1-6	Neuron navigator 2	NAV2	44270000	0	49277000	0	0	0	39907000	56277000	33443000	48365000	0	0
A0A0A0MTH3;Q13418;Q13418-2;Q13418-3;A0A087WWY6;E9PQ52;A0A087WW45	Integrin-linked protein kinase	ILK	355100000	417240000	398770000	370180000	350360000	385620000	453510000	429930000	468330000	356340000	412510000	366030000
A0A0A0MTH9;O14981;O14981-2	TATA-binding protein-associated factor 172	BTAF1	1441400000	1463600000	1477500000	1705000000	1842800000	1722400000	1243200000	1286500000	1249300000	1544400000	1615100000	1512600000
A0A0A0MTI1;Q15392-2;Q15392;H7C4B7;A0A3B3IT58;A0A3B3ITT9;A0A3B3IRV7;A0A3B3ISR5	Delta(24)-sterol reductase	DHCR24	2756600000	1737500000	2940800000	2029600000	1740400000	1663400000	1389200000	2485700000	1685100000	1399900000	1177600000	1491900000
A0A0A0MTL5;Q13309-2;Q13309;D6R9R7	S-phase kinase-associated protein 2	SKP2	77397000	69958000	84281000	9664000	13456000	11475000	98103000	79930000	72748000	0	0	0
A0A0A0MTL6;Q6ZS17-2;Q6ZS17;Q6ZS17-3;Q6ZS17-4;H3BSV5;H3BMG9;H3BQI5;H3BP86;H3BSX9;H3BU12	Protein FAM65A	FAM65A	15345000	28506000	20106000	67420000	36478000	37481000	36496000	23025000	26858000	19983000	0	20509000
A0A0A0MTN0;Q13617;Q13617-2;Q5T2B5;Q5T2B7	Cullin-2	CUL2	2692300000	2798700000	2692600000	3336300000	3256100000	3797200000	2677900000	2648500000	2917000000	3317900000	3759100000	3433100000
H0YB18;H0YB70;F6UJY9;J9JIE9;A0A0A0MTR5;E7EWH8;F6UJY1;Q5T013-2;Q5T013-4;Q5T013-3;Q5T013	Hydroxypyruvate isomerase;Putative hydroxypyruvate isomerase	HYI	0	0	0	0	0	0	0	0	10688000	0	0	0
A0A0A0MTR7;A0A0A0MTC1;Q63HN8;Q63HN8-4;Q63HN8-5;Q63HN8-6;I3L3H9	E3 ubiquitin-protein ligase RNF213	RNF213	3870700000	3674800000	3545800000	17585000000	18370000000	17766000000	4026500000	3721500000	4095000000	17655000000	16833000000	18088000000
A0A0A0MTS7;Q8WZ42-2;Q8WZ42;Q8WZ42-8;Q8WZ42-13;Q8WZ42-12;Q8WZ42-5;A0A0A0MRA3;Q8WZ42-3;Q8WZ42-10;Q8WZ42-9	Titin	TTN	241280000	271290000	258210000	236000000	254930000	224830000	218880000	282120000	215360000	216670000	349810000	319810000
K7EKZ0;A0A0A0MTS9;K7EP24;K7ER94;Q2V2M9-2;Q2V2M9;Q2V2M9-3;Q2V2M9-4	FH1/FH2 domain-containing protein 3	FHOD3	230740000	220180000	360730000	0	524810000	0	256990000	266060000	357160000	0	201730000	0
A0A0A0MTU3;Q4ZIN3-2;Q4ZIN3;U3KPY4	Membralin	TMEM259	0	0	0	0	69457000	56345000	1391300000	1098800000	1226800000	1222800000	0	0
A0A0A6YYA0;Q86XR7-2;Q9Y3B3-2;Q9Y3B3;G3V2Y2	Transmembrane emp24 domain-containing protein 7	TMED7-TICAM2;TMED7	1377600000	1139000000	1344100000	1533900000	1629500000	1702600000	998800000	1194700000	1024600000	1076400000	1444700000	1534200000
A0A0A6YYC7;Q96JP5-2;Q96JP5;H3BTR0;H0YCH4;Q9BU19-3;Q9BU19-2;Q9BU19;Q9BU19-5;Q96CK0	E3 ubiquitin-protein ligase ZFP91	ZFP91-CNTF;ZFP91	206490000	182240000	218810000	281710000	256940000	269070000	197610000	229820000	258140000	263150000	236980000	256430000
A0A0A6YYG7;Q6IBW4-2;Q6IBW4;Q6IBW4-4;E5RJN3;Q6IBW4-5;E5RJL4;F8WAR3;H0YC55	Condensin-2 complex subunit H2	NCAPH2	37219000	55068000	55715000	40869000	0	44495000	43574000	39107000	46634000	28557000	34683000	35764000
A0A0A6YYH1;Q7Z6K5-2;Q7Z6K5;H0YMP5;H0YL03;H0YMK0;H0YL85	Arpin	C15orf38-AP3S2;ARPIN	168400000	144360000	177870000	210930000	235410000	268280000	162070000	202150000	177700000	293460000	223390000	216910000
A0A0A6YYI3;A0A0B4J1V8;Q9NQ55-2;Q9NQ55;Q9NQ55-3;A8MV53;H7C446;C9J3W3;C9JHF7	Suppressor of SWI4 1 homolog	PPAN-P2RY11;PPAN	367430000	261100000	349280000	258560000	272120000	229550000	235050000	360610000	255330000	363270000	408920000	416910000
A0A0A6YYJ8;Q96HJ9-2;Q9Y383-3;Q9Y383-2;B8ZZ12	UPF0562 protein C7orf55;Putative RNA-binding protein Luc7-like 2	LUC7L2;C7orf55	3924200000	3514500000	3364900000	4316200000	3877400000	3919200000	3469100000	3507200000	3511100000	3494500000	3504400000	3449500000
A0A0A6YYL2;P0DMN0;P0DMM9;P0DMM9-3;P0DMM9-2;H3BPL6;H3BNY7;H3BRT0	Sulfotransferase;Sulfotransferase 1A4;Sulfotransferase 1A3	SULT1A4;SULT1A3	1156100000	1336900000	1090700000	405360000	542670000	405820000	1404000000	1234000000	1120900000	687900000	793970000	684250000
P57737-3;A0A0A6YYL4;P57737;P57737-4;P57737-2;I3L167;E7EP81;Q9Y3D7;I3L0X9;I3L3T0;I3L1U7;I3L442;I3L426;I3L1G9;I3L359;I3L351;I3NI06;I3L212;I3L1M1;I3L2Y6	Coronin-7;Coronin	CORO7;CORO7-PAM16	374140000	345200000	327040000	398430000	449060000	417970000	381380000	400100000	372420000	451610000	418230000	472160000
A0A0B4J1R2;Q9H6R3;Q9H6R3-2;F8VZB4;H0YII9	Acyl-CoA synthetase short-chain family member 3, mitochondrial	ACSS3	1343400000	1303200000	1296600000	1348200000	1448900000	1411700000	1420600000	1405900000	1370000000	1156600000	1504900000	1211800000
A0A0B4J1R7;Q96B45	UPF0693 protein C10orf32	C10orf32-ASMT;C10orf32	221550000	233270000	232390000	151830000	172250000	209010000	254120000	300680000	259750000	180430000	140900000	319970000
A0A0B4J1S8;Q9UBF8-2;Q9UBF8;Q9UBF8-3;E9PL47;F8W860;A0A0A0MSL0	Phosphatidylinositol 4-kinase beta	PI4KB	230590000	225980000	241550000	206700000	181330000	193460000	193210000	229840000	212510000	180370000	152600000	160460000
A0A0B4J1V9;Q9NRZ9-3;Q9NRZ9-2;Q9NRZ9;Q9NRZ9-6;Q9NRZ9-5;Q9NRZ9-4;F6XU50;A0A087WSW7;Q9NRZ9-8;Q9NRZ9-7;B1ALG6;Q9NW36;Q76H82;Q9NRZ9-9	Lymphoid-specific helicase	HELLS	791810000	547120000	858640000	308220000	389350000	373260000	450350000	738690000	590230000	522100000	532510000	582050000
F5H5K2;A0A0B4J1W0;O75448-2;O75448;B4DDR8;F5GY88;E9PFL1;J3KTL3;J3KSU0;F5H2D6;J3QLF8;F5H0M2;J3KSL1	Mediator of RNA polymerase II transcription subunit 24	MED24	112820000	100550000	97416000	92986000	112700000	97745000	114930000	76184000	108480000	104520000	107730000	118100000
A0A0B4J1Z1;C9JAB2;Q16629-3;Q16629-2;Q16629-4;Q16629;F8WEA1	Serine/arginine-rich splicing factor 7	SRSF7	3957200000	4183100000	3659900000	4992600000	5116800000	4386800000	4037800000	4042300000	4069500000	4823100000	5395700000	4316600000
E9PNF5;A0A0B4J216;Q6IA69-2;Q6IA69	Glutamine-dependent NAD(+) synthetase	NADSYN1	31906000	22302000	31500000	23385000	0	0	0	21841000	0	22283000	0	0
A0A0B4J254		SNRPF	30478000	33308000	31416000	35694000	31726000	30230000	34776000	46077000	35342000	0	0	35961000
A0A0B4J291;Q8N8U2	Chromodomain Y-like protein 2	CDYL2	0	0	4813600	0	0	0	0	0	0	16239000	0	0
A0A0B4J294;H3BP13;Q9UL33-2;Q9UL33;H3BPN3;H3BUK6;A0A0B4J286;H3BQQ8;H3BPE0	Trafficking protein particle complex subunit 2-like protein	TRAPPC2L	28730000	31727000	28725000	30799000	28777000	28385000	41630000	27738000	47249000	31341000	38435000	27026000
Q5W0H4;A0A0B4J2C3;P13693;J3KPG2;E9PJF7;P13693-2;Q56UQ5;H0YCX0;Q9HAU6	Translationally-controlled tumor protein	TPT1	4436800000	4260100000	3935800000	3889400000	4309700000	4208300000	4023000000	3921800000	4170700000	4438700000	5885600000	4128400000
P0DPI2;A0A0B4J2D5;P0DPI2-2;A0A0B4J2H4;A0A0B4J2D5-2;F2Z2Q0;A0A096LP12;A0A2R8Y6K9			159380000	241830000	164670000	245240000	0	0	337450000	217090000	258420000	122260000	191980000	257260000
A0A0B4J2E5;Q15269;A0A0J9YX21;C9J544	Periodic tryptophan protein 2 homolog	PWP2	656920000	711380000	686310000	547570000	488500000	543520000	730700000	729030000	761320000	695650000	791550000	760090000
A0A0B4J2F0		PIGBOS1	27632000	24312000	22652000	32773000	24751000	22923000	20793000	18948000	19618000	0	36580000	24338000
A0A0B4J2F8;F6S314;E2QRJ6;P52435;A6NFM0;Q9H1A7;Q9GZM3;F8WF84;D6RAG0;E7EP90;A0A0B4J1Z8;H0Y980;Q9GZM3-2	DNA-directed RNA polymerase II subunit RPB11-a;DNA-directed RNA polymerase II subunit RPB11-b2;DNA-directed RNA polymerase II subunit RPB11-b1	POLR2J3;POLR2J;POLR2J2	299110000	281540000	250170000	260130000	230390000	259540000	296360000	250450000	276690000	243640000	242140000	219430000
A0A0C4DFL7;Q16850;Q16850-2;H7C0D0;A0A3B3ITR4	Lanosterol 14-alpha demethylase	CYP51A1	874910000	620960000	1057500000	196420000	275760000	198750000	399260000	740080000	527540000	242920000	104150000	287690000
A0A0C4DFL8;F5GX28;O94953;O94953-2;K7EQ54;K7ES23	Lysine-specific demethylase 4B	KDM4B	128780000	279090000	213670000	24485000	24691000	42911000	120080000	95614000	97209000	37498000	40749000	18722000
A0A0C4DFM1;Q92544;F8WCN2;F2Z2L1	Transmembrane 9 superfamily member 4	TM9SF4	934000000	936410000	1190200000	1450500000	1573100000	1597400000	856510000	989130000	866750000	854610000	851810000	778060000
A0A0C4DFM2;Q6ZN55;Q6ZN55-2	Zinc finger protein 574	ZNF574	62959000	73804000	81015000	65141000	49428000	53136000	75465000	102700000	82549000	58670000	0	59484000
A0A0C4DFM7;Q5TAX3;E9PKY2;Q5TAX3-2;E9PRG2;E9PKX1;X6R5G7;E9PJN7;E9PQS7;H0YDJ1;H0YEE8	Terminal uridylyltransferase 4	ZCCHC11	162110000	146780000	166700000	140820000	155090000	150330000	130070000	123450000	74688000	79846000	203080000	66708000
A0A0C4DFN3;Q99685-2;Q99685;H7C599;H7C4E0;A0A3B3ITT3;E7EWX8;C9JAM4	Monoglyceride lipase	MGLL	32129000	38656000	42922000	14347000	16809000	15085000	40647000	45339000	58381000	29233000	0	24287000
V9GYJ5;E9PBM9;A0A0C4DFQ8;P0C7U1-2;P0C7U1;Q9NR71-2;Q9NR71	Putative inactive neutral ceramidase B;Neutral ceramidase;Neutral ceramidase soluble form	ASAH2;ASAH2B	0	0	0	0	0	0	0	0	0	0	0	0
A0A0C4DFS6;Q9C004	Protein sprouty homolog 4	SPRY4	0	14711000	15368000	31642000	75249000	76616000	63912000	73238000	65429000	83331000	0	96640000
Q12959-2;A0A0C4DFT3;Q12959-4;Q12959-6;Q12959-3;Q12959-5;Q12959;Q12959-7;Q12959-8;Q12959-9;E7EQD7;B4E2H8;H7C166;A0A3B3ISQ5;B7Z647;B9EGL1;A0A3B3IS17;B7Z3U2;P78352-2;P78352;P78352-3;A0A3B3ISR0;C9IYP1;C9JN61;F2Z2L0;A8MUT6;A0A3B3IU19;Q6ZSU2;C9J110;Q5JUW8;C9JCP6;C9JUA9;K7EKP9;Q92796-2;Q92796;Q92796-3;O14909;A0A3B3ITI9;C9JWP9;C9JYG3;A8MUT9;K7EKU8	Disks large homolog 1	DLG1	1024500000	1001100000	1065400000	766710000	781170000	659330000	1073900000	1000200000	1052100000	742400000	804730000	752200000
A0A0C4DFX4;Q6ZRS2-3;Q6ZRS2-2;Q6ZRS2;A0A0A0MS59;A0A087X0E3	Helicase SRCAP	SRCAP	151270000	166090000	116280000	108670000	96904000	69920000	124600000	100740000	68691000	97021000	114660000	73282000
Q9H967;A0A0C4DFX7;C9JE56	WD repeat-containing protein 76	WDR76	59903000	41991000	55426000	33400000	30363000	21329000	41253000	48489000	44664000	38286000	19800000	26052000
A0A0C4DFX9;Q9H3P2;H0Y3X6;C9JHL4;Q9H3P2-7;H7C2C7;C9JEM7;F8W954;F8WF98;H7C0W2;H7C2M8;H7C3C2	Negative elongation factor A	NELFA	1100300000	1037000000	1131700000	1052900000	987460000	998310000	854750000	1072800000	889550000	1028700000	1051500000	1107100000
A8MXZ4;A0A0C4DFY5;Q9NQ84;Q9NQ84-2;J9JIE0	G-protein coupled receptor family C group 5 member C	GPRC5C	76600000	72212000	68706000	92807000	113180000	96464000	78755000	73604000	64844000	66137000	59378000	54012000
A0A0C4DFZ2;P15289;P15289-2;V9GYR0	Arylsulfatase A;Arylsulfatase A component B;Arylsulfatase A component C	ARSA	478120000	425240000	450560000	1674000000	1738700000	1816800000	510640000	371570000	414220000	1089500000	1428200000	1250500000
C9J9K3;A0A0C4DG17;P08865;F8WD59	40S ribosomal protein SA	RPSA	20714000000	20987000000	20037000000	18345000000	18836000000	18905000000	21045000000	20812000000	21168000000	19271000000	23537000000	20980000000
F8WAL6;Q9NYB9;Q9NYB9-4;Q9NYB9-2;A0A0C4DG21;E7EP65;E7EW77;E9PEZ7;Q9NYB9-3;B7Z836;H7C3Q7;H0Y6B5;F8WEB9;F8WBL5;F8WAU3;F8WAZ8;F8WCD7;E7EUA1	Abl interactor 2	ABI2	101790000	100140000	98945000	148020000	259450000	151730000	66224000	73614000	70598000	105020000	0	84230000
A0A0C4DG51;Q9NP80-3;Q9NP80-2;Q9NP80;C9JAX4	Calcium-independent phospholipase A2-gamma	PNPLA8	30387000	40641000	31413000	61499000	57552000	86027000	41306000	0	29303000	45160000	66845000	54079000
F5GYV5;H7BZV4;A0A0C4DG62;F8WCT1;Q66PJ3-7;Q66PJ3-4;Q66PJ3-3;Q66PJ3-2;Q66PJ3;F5H7X4;F8WEP2;A0A0C4DH18;Q66PJ3-5	ADP-ribosylation factor-like protein 6-interacting protein 4	ARL6IP4	103050000	107400000	95111000	185000000	274450000	273380000	122740000	125460000	135400000	212780000	0	98568000
A0A0C4DG80;A0A0C4DG99;Q9P2N7-2;Q9P2N7-3;Q9P2N7-4;Q9P2N7;Q9P2N7-5	Kelch-like protein 13	KLHL13	0	0	0	0	0	0	15566000	10846000	0	0	0	0
A0A2R8Y547;A0A2R8Y7V2;C9JQB1;C9J9V6;A0A0C4DG91;O75414-2;O75414	Nucleoside diphosphate kinase;Nucleoside diphosphate kinase 6	NME6	32292000	27268000	22695000	0	0	0	29234000	20182000	19848000	21976000	0	19447000
E9PD56;H7BYG4;W5RWE6;A0A0C4DG95;Q7Z7A4-5;Q7Z7A4-7;Q7Z7A4-2;Q7Z7A4-6;Q7Z7A4-4;Q7Z7A4;H7C4V0;Q7Z7A4-3;U3KQS4;H7C529;H7C4W2;Q96I76	PX domain-containing protein kinase-like protein	PXK	22038000	17892000	13926000	30114000	35614000	38054000	25623000	14814000	16669000	55017000	34785000	67069000
A0A0C4DGA2;O75521-2;O75521;F1LLU7;F8WAW4;C9JB63;F8W6J1	Enoyl-CoA delta isomerase 2, mitochondrial	ECI2	2114500000	2045800000	1968500000	2053300000	1982600000	2100700000	2178200000	2196100000	2158000000	1635900000	1704400000	1706500000
A0A0C4DGA6;Q14527;Q14527-2;H7C5K0	Helicase-like transcription factor	HLTF	512210000	491510000	512680000	368960000	424930000	447320000	365870000	469130000	448030000	487920000	548940000	553640000
A0A0C4DGB0;Q9UIL1-3;Q9UIL1-2;Q9UIL1	Short coiled-coil protein	SCOC	193170000	223290000	0	265290000	219750000	259020000	190700000	165350000	202510000	260530000	271390000	337430000
P20810-6;P20810-10;A0A0C4DGB5;P20810-7;P20810-9;P20810;P20810-5;P20810-8;P20810-4;B7Z574;E7ES10;P20810-2;E9PCH5;E9PDE4;P20810-3;H0Y7F0;E7EQ12;E7EQA0;A0A0C4DGD1;F8W7E0;D6RC54;D6RAA8;H0YA91;E9PSG1;H0Y944;E7EN75;D6RBR1;D6RGF7;E7EQK6	Calpastatin	CAST	2665300000	2542200000	2459100000	3837200000	3665900000	3624100000	2428200000	2519700000	2640000000	3305800000	3042300000	3281700000
A0A0C4DGB9		PPA2	20531000	24512000	13863000	4016900	10657000	9530700	13644000	25866000	13129000	10653000	7857200	14896000
A0A0C4DGE6;E9PNT2;E9PIR1;A0A0G2JRG8;A0A0G2JNY3;Q6ZUM4-2;Q6ZUM4-3;Q6ZUM4	Rho GTPase-activating protein 27	ARHGAP27	43449000	47082000	42350000	30625000	35506000	32576000	50742000	54330000	51772000	48108000	56418000	57680000
A0A0C4DGG3;Q8NHM5-4;Q8NHM5-3;Q8NHM5;Q8NHM5-2	Lysine-specific demethylase 2B	KDM2B	30793000	31863000	32388000	19226000	43746000	23252000	30386000	33681000	26880000	36482000	45917000	0
Q14839-2;Q14839;A0A0C4DGG9;A0A2R8Y521;A0A2R8Y212;F5GWX5;A0A2U3TZM0;A0A2R8YFK9;A0A2R8Y5J0;A0A2R8Y425;A0A2R8YFD8;A0A2R8YDJ9;A0A2R8YD40;A0A2R8Y445;A0A2R8YER1;A0A2R8Y8C1;A0A2R8YDW2;A0A2R8Y4X2;A0A2R8Y5Z7;A0A2R8Y685;A0A2R8Y7I0;A0A2R8Y8B3;A0A2R8Y7M9;A0A2R8Y5M9;A0A2R8YE38;F5H6N4;A0A2R8Y6G9;A0A2R8Y7X1;K7EPV1;F6T542;A0A2R8Y795	Chromodomain-helicase-DNA-binding protein 4	CHD4	5602100000	4728400000	5872300000	5919000000	5431500000	5204000000	3985600000	5090700000	4633900000	5941300000	5729000000	5418300000
A0A0C4DGH0;Q5ZPR3-3;Q5ZPR3-4;Q5ZPR3;H0YL10;Q5ZPR3-2;H0YK40;H0YK59;H0YLT8;H0YN85;H0YN29	CD276 antigen	CD276	519870000	540800000	612500000	309450000	293530000	280600000	319430000	335280000	315920000	235790000	180740000	225860000
M0QYC2;A0A0C4DGH3;Q9Y6R0;M0R0Q4;M0QZV7;M0QXQ4	Numb-like protein	NUMBL	66790000	54966000	66604000	0	0	0	0	54371000	60155000	0	0	64044000
A0A0C4DGJ8;G3V521;G3V4R2;G3V332;G3V427;Q6IPR1	LYR motif-containing protein 5	LYRM5	15580000	14915000	14220000	14989000	12843000	16665000	0	10034000	8353200	7106700	10926000	12838000
A0A0C4DGL2;H0YLN8;Q96QT4	Transient receptor potential cation channel subfamily M member 7	TRPM7	7723300	8308200	6996900	0	2542100	0	8753200	8332200	12521000	6060900	0	7480000
H3BS99;A0A0C4DGM5;H3BSS6;Q9H2Y7-2;Q9H2Y7	Zinc finger protein 106	ZNF106	8852300	0	0	0	0	0	6948400	8011400	9758200	0	0	0
A0A0C4DGM9;B7Z896;F5H3M2;Q9BVG8-4;Q9BVG8-5;Q9BVG8-2;Q9BVG8;Q9BVG8-6;H3BMJ1;H3BTN1;H3BMR0;H3BV47;H3BTU1;H3BMQ3;H3BTL6	Kinesin-like protein;Kinesin-like protein KIFC3	KIFC3	5079500	0	0	16257000	18298000	18085000	12752000	21485000	12117000	10911000	13758000	11898000
A0A0C4DGQ5;P04632;U3KQE2;A0A075B7C0;K7ELJ7;K7EIV0;K7EKD8;U3KPR7;K7EM73;Q96L46;K7ES78;K7EMQ1	Calpain small subunit 1	CAPNS1	2327500000	2570200000	2209100000	3320200000	3409700000	3274500000	2797900000	2331500000	3001600000	3314900000	2980900000	3113700000
A0A0C4DGQ8;Q6IAN0;J3KRS1;J3QLJ8;J3QKT1;J3QLK1	Dehydrogenase/reductase SDR family member 7B	DHRS7B	445170000	329250000	492960000	569750000	609610000	583820000	256090000	418890000	313130000	555450000	472690000	494360000
A0A0C4DGS0;A0A2Y9D025;P56556;R4GN43	NADH dehydrogenase [ubiquinone] 1 alpha subcomplex subunit 6	NDUFA6	1133600000	970570000	1083600000	971190000	975650000	942920000	1115900000	1125000000	1009300000	1114900000	1236100000	1083900000
A0A0C4DGS1;P39656;P39656-3;P39656-2;U3KQ84	Dolichyl-diphosphooligosaccharide--protein glycosyltransferase 48 kDa subunit	DDOST	9014700000	5873800000	10188000000	11230000000	12482000000	12387000000	5710100000	9629000000	6212200000	10643000000	12102000000	11274000000
Q643R3;A0A0C4DGT4;H3BMK4	Lysophospholipid acyltransferase LPCAT4	LPCAT4	0	0	0	0	0	0	0	0	0	27019000	32730000	0
R4GNJ5;A0A3F2YNW4;A0A0C4DGT6;Q96AP0-2;Q96AP0	Adrenocortical dysplasia protein homolog	ACD	5863800	8038700	11202000	0	0	0	10217000	9611100	9703700	7674500	0	0
A0A0C4DGU7;Q8N9Z2;Q8N9Z2-2	Coiled-coil domain-containing protein 71L	CCDC71L	12021000	7708100	9093300	50149000	42440000	39701000	57395000	17563000	54108000	59128000	40659000	64136000
A0A0C4DGV9;P49917	DNA ligase;DNA ligase 4	LIG4	51692000	41218000	68816000	99271000	84371000	136380000	51764000	42080000	33226000	87029000	81353000	90817000
A0A3B3IRK3;H7C5F7;B4DGY6;A0A0C4DGW0;Q9NV92	NEDD4 family-interacting protein 2	NDFIP2	25600000	0	20726000	28428000	30118000	30957000	19696000	30757000	23433000	13638000	0	13411000
A0A0C4DH01;Q9NVU0-5;Q9NVU0;Q9NVU0-4;Q9NVU0-3;Q9NVU0-2;H3BNJ0;H3BM46;H3BRY1;H3BMR4	DNA-directed RNA polymerase III subunit RPC5	POLR3E	106760000	162680000	104170000	31880000	26900000	35816000	162500000	197250000	127390000	25499000	94665000	52273000
A0A0C4DH07;Q8N2S1-2;Q8N2S1-3;Q8N2S1	Latent-transforming growth factor beta-binding protein 4	LTBP4	0	0	0	5701600	4762000	5502800	0	0	0	0	0	0
A0A0C4DH14;Q6P5X5	UPF0545 protein C22orf39	C22orf39	2627400	2295100	3260800	2452700	0	1473700	3606000	2389200	3921300	5639400	3823200	5269800
H7BXT7;A0A0C4DH16;B8ZZS0;Q9NYM9;E9PQJ6;E9PHY4	BET1-like protein	BET1L	0	0	0	0	0	0	76457000	407090000	42796000	79301000	0	290590000
A0A0D9SEI0;Q9P0P8	Uncharacterized protein C6orf203	C6orf203	76101000	66459000	94246000	45667000	49793000	45062000	67942000	66930000	65114000	55153000	48294000	55081000
A0A0D9SEJ5;F5GY05;Q96EK7-2;Q96EK7	Constitutive coactivator of peroxisome proliferator-activated receptor gamma	FAM120B	7805800	7491000	6803800	6921500	4984600	4748500	7359500	6701600	6786300	4977800	0	6316300
A0A0D9SEM9		DDX39A	488730000	456350000	479990000	352810000	417010000	384410000	249500000	311480000	261170000	205470000	397900000	341280000
Q04726-2;H0YL70;Q04726;Q04726-4;Q04726-5;Q04726-6;Q04726-3;Q04726-7;H0YKN8;H0YKT5;A0A0D9SES8;H0YNT2;H0YNI7;H0YLI3;H0YKH0;H0YLW9;K7EMK7;Q04725;Q04725-2;Q04725-3;K7EJR7	Transducin-like enhancer protein 3	TLE3	348560000	423270000	424510000	280200000	258690000	312980000	600540000	594520000	646670000	441340000	395640000	419390000
A0A0D9SEU5;R4GMX8;Q6VN20-3;Q6VN20;Q6VN20-2;R4GN91;R4GNA3;R4GMX7	Ran-binding protein 10	RANBP10	152560000	154560000	128920000	252570000	245140000	300880000	119710000	139030000	134220000	192150000	241580000	174590000
Q5T321;A0A0D9SF28;F5GXV7;Q8NFP9;Q8NFP9-2;Q8NFP9-3	Neurobeachin	NBEA	0	0	0	147850000	127930000	167870000	0	70097000	0	70623000	17567000	44370000
A0A0D9SFB3;A0A0D9SF53;A0A2R8YFS5;A0A2R8Y4A4;A0A0D9SG12;O00571;A0A2R8YF78;A0A2R8YCW1;A0A2R8Y645;A0A2R8YFR4;A0A2U3TZJ9;A0A2R8Y5G6;O00571-2;F6S8Q4;A0A2R8YDT5;A0A2R8Y7T2;A0A2R8YDH3;O15523-2;O15523;A0A0J9YVQ7;O15523-3;A0A087WVZ1;A0A2R8Y650;C9J081;A0A2R8YCU0;C9J8G5;A0A2R8YF89;A0A087WX09;A0A2R8Y4D2;D6RCM4;A0A2R8Y770;Q9NQI0-4;Q9NQI0-2;Q9NQI0-3;Q9NQI0;H0Y960	ATP-dependent RNA helicase DDX3X;ATP-dependent RNA helicase DDX3Y	DDX3X;DDX3Y	12522000000	12036000000	12706000000	9230000000	9490200000	9041000000	13532000000	12918000000	13589000000	10435000000	11524000000	10183000000
A0A0D9SF60;Q99569-2;Q99569;H0YFB1;E7EST6	Plakophilin-4	PKP4	419050000	384430000	423980000	484120000	456280000	475580000	420080000	440150000	479730000	544370000	505590000	483400000
A0A0D9SFG6;Q15438-3;Q15438-2;Q15438;Q99418-2;O43739-2;Q99418;O43739;K7EKA2;K7ERV8;M0R2J0;F8W8E2;K7ENQ8;A0A286YF81;G5E9B7;Q9UIA0	Cytohesin-1;Cytohesin-2;Cytohesin-3;Cytohesin-4	CYTH2;CYTH1;CYTH3;CYTH4	21121000	29129000	31803000	29466000	38449000	35326000	25075000	28029000	22812000	35299000	28806000	35061000
A0A0D9SFK2;Q92614-4;Q92614;Q92614-3;Q92614-2;Q92614-5;H0YEV9;A0A1B0GWJ6	Unconventional myosin-XVIIIa	MYO18A	3459000000	2904200000	3284900000	2647000000	2579800000	2632100000	2776600000	3615200000	3116700000	2821700000	2716700000	3100600000
A0A0D9SG71;P49459;A0A0D9SEZ6;A0A0R4J2E5;P49459-3;P49459-2	Ubiquitin-conjugating enzyme E2 A	UBE2A	200960000	283490000	204340000	203300000	195570000	195410000	191820000	269850000	316350000	223150000	360030000	200330000
A0A1B0GWF2;A0A1B0GVQ5;A0A2R8Y5D4;A0A0D9SG72;A0A1B0GTP9;P61764;P61764-2;A0A1B0GW76;A0A096LP33;A0A096LP52	Syntaxin-binding protein 1	STXBP1	119230000	64977000	91335000	223300000	218980000	219440000	65925000	84734000	76136000	112450000	121560000	85395000
A0A0D9SGH0;Q92581-3;Q92581-2;A0A1B0GW29;A0A1B0GV11;Q92581;A0A0D9SFM4	Sodium/hydrogen exchanger 6	SLC9A6	31766000	0	43974000	27820000	0	24987000	0	0	0	20297000	0	37038000
Q9NQB0;Q9NQB0-14;Q9NQB0-7;Q9NQB0-2;Q9NQB0-6;Q9NQB0-4;Q9NQB0-9;Q9NQB0-11;Q9NQB0-3;Q9NQB0-13;A0A0D9SGH8;Q5VVR7;C6ZRK5;C6ZRJ7;E2GH26;Q9NQB0-8;Q9NQB0-16;Q9NQB0-5;Q9NQB0-12;Q9NQB0-10;Q9NQB0-15;C6ZRJ6;A0A0A0MTL7;P36402-13;H0YBC8;H0YAR8;Q5JRY5;P36402-16;P36402-10;Q5JRY3;P36402-14;P36402-8;Q9UJU2;P36402-11;P36402-3;A0A1B0GUV5;P36402-6;P36402-15;P36402-2;Q9UJU2-5;P36402-12;P36402-4;P36402-7;P36402;P36402-…	Transcription factor 7-like 2;Transcription factor 7;Lymphoid enhancer-binding factor 1;Transcription factor 7-like 1	TCF7L2;TCF7;LEF1;TCF7L1	32911000	39188000	31645000	21742000	25735000	25551000	20506000	0	22856000	0	0	0
A0A0G2JH67;O15205	Ubiquitin D	UBD	0	0	0	40514000	34391000	27365000	0	0	0	18453000	12188000	0
A0A0G2JH68;O60610;A0A140T8Z0;O60610-2;O60610-3;H9KV28;A0A2R8Y5N1;B4E2I7;A0A2R8YEF8;H7C2W8	Protein diaphanous homolog 1	DIAPH1	6611100000	6223600000	6636700000	5761600000	5601600000	5820300000	5557400000	6258000000	6091700000	6051600000	5238000000	6020100000
A0A0G2JHC2;Q6NYC8;Q6NYC8-3;Q6NYC8-2;Q6NYC8-4;A0A0G2JKF1	Phostensin	PPP1R18	58378000	59731000	56561000	79423000	64768000	63694000	67581000	76959000	56473000	106120000	58605000	78170000
A0A0G2JIM1;H0Y7D7;Q99941-2;Q99941	Cyclic AMP-dependent transcription factor ATF-6 beta;Processed cyclic AMP-dependent transcription factor ATF-6 beta	ATF6B	0	0	8239100	0	0	0	0	0	0	11827000	0	0
A0A0G2JIS2;A2ABF8;A0A0G2JIR1;A2ABF9;A0A0G2JK64;Q96KQ7-2;Q96KQ7;A0A0G2JRR0;A0A0G2JRN8;H0Y4K5	Histone-lysine N-methyltransferase EHMT2	EHMT2	42193000	59672000	73749000	73126000	70676000	67238000	79017000	69088000	80490000	59922000	99116000	46662000
A0A0G2JIW1;P0DMV9;P0DMV8;P0DMV8-2;V9GZ37	Heat shock 70 kDa protein 1B;Heat shock 70 kDa protein 1A	HSPA1B;HSPA1A	18536000000	18771000000	19002000000	17962000000	19167000000	19365000000	18797000000	20251000000	19660000000	18606000000	22258000000	18354000000
A0A0G2JJD3;O95870;O95870-2;A0A0G2JI89;F2Z3H2	Abhydrolase domain-containing protein 16A	ABHD16A	125130000	82923000	173350000	339220000	388300000	379570000	76130000	130450000	78872000	257570000	231980000	310110000
A0A140T9L0;A0A0G2JJL1			22120000	17713000	0	0	0	17329000	0	19510000	0	16461000	21873000	22392000
A0A0G2JJX2;Q9BZY9	E3 ubiquitin-protein ligase TRIM31	TRIM31	0	2354000	0	8611300	0	0	0	0	0	0	0	0
P25440-2;P25440;A0A0G2JK44;A0A140T9E9;H0Y6K2;P25440-3;P25440-4;A0A140T9V2;A0A0G2JHL0;A0A140T9F7;U3KQA6;A0A140T9I1;A0A0G2JHN8;E9PIQ3;A0A140T9X8;H0Y799;E9PKQ9;U3KPW0;H0YDJ7	Bromodomain-containing protein 2	BRD2	204990000	205270000	202840000	129020000	119340000	147960000	224330000	212140000	212110000	167710000	130970000	121650000
A0A0G2JKR7;P28702;P28702-3;A0A0G2JHI1;A0A087WZ88;P48443	Retinoic acid receptor RXR-beta	RXRB	26893000	26244000	27362000	0	39035000	39749000	35755000	35283000	0	31936000	28111000	50582000
A0A140TA29;A0A0G2JL54;F5GXS0;A0A3B3ISD7		C4B	0	0	0	325860000	344830000	326690000	0	0	0	163800000	104080000	220800000
A0A0G2JNZ5;A0A0G2JLB3;P04062-4;P04062-2;P04062;A0A0G2JNZ0;P04062-5	Glucosylceramidase	GBA	1781900000	2034900000	1941400000	2460000000	2800700000	2701400000	1955900000	1894200000	1860800000	2105200000	2138700000	2366200000
A0A0G2JLR5;A0A0G2JMW4;Q02833-3;Q02833-2;Q02833;H0YEI0	Ras association domain-containing protein 7	RASSF7	77946000	68469000	67147000	44723000	28305000	37720000	83653000	85226000	93214000	79133000	58091000	64759000
A0A0G2JMG3;O95255;A0A1W2PQX7;A0A1W2PPQ8;A0A0J9YVW5;O95255-3	Multidrug resistance-associated protein 6	ABCC6	0	0	11495000	0	28009000	0	13061000	0	12355000	42016000	0	23530000
A0A0G2JMS6;Q6IE36	Ovostatin homolog 2	OVOS2	42674000	34111000	33858000	35724000	40252000	39477000	0	0	31869000	23313000	0	37332000
A0A0G2JMZ8;Q16625;Q16625-4;Q16625-2;Q16625-3;Q16625-5;A0A0G2JPF2;Q16625-6;Q16625-7	Occludin	OCLN	199660000	211660000	209130000	257440000	288490000	302990000	231830000	200800000	217810000	325350000	371980000	357630000
A1BQX2;A0A0G2JQ38;D6RA09;A0A0G2JN23;Q8N4S9-3;Q8N4S9	MARVEL domain-containing protein 2	MARVELD2	16125000	20407000	0	24897000	0	0	0	0	0	16402000	36308000	0
A0A1W2PRB5;A0A0J9YVS1;A0A0G2JQF5;A0A3B3IT55;A0A0G2JNB1;A0A0G2JQF4;A0A0G2JNT7;Q7Z3B3;Q7Z3B3-4;Q7Z3B3-2;A0A1W2PRR3;I3L233;A0A1W2PPV8	KAT8 regulatory NSL complex subunit 1	KANSL1	22752000	25639000	25160000	25271000	15751000	24183000	37379000	33398000	31122000	26871000	22950000	2814800
A0A0G2JNW7;Q9Y666;A0A0U1RR18;A0A0G2JQE3;H0YB78;Q9Y666-2	Solute carrier family 12 member 7	SLC12A7	68989000	61107000	60021000	138610000	157800000	139080000	82287000	85228000	75419000	144570000	161580000	173690000
A0A0G2JNZ2;A0A0G2JPP5;Q14160;Q14160-3;A0A0G2JMS7;Q14160-2;H0YCG0;H0YDF9	Protein scribble homolog	SCRIB	628490000	687490000	731760000	441270000	463880000	412240000	748630000	724220000	753640000	493610000	612800000	559450000
Q8MH48;Q5RJ85;A0A0G2JPQ3;P17693-5;P17693;P17693-4	HLA class I histocompatibility antigen, alpha chain G	HLA-G	0	10453000	0	1061000000	1216900000	1230600000	13548000	0	0	903650000	916200000	796630000
A0A0G2JPR0;A0A140TA49			17157000	10576000	11691000	3961500000	3981200000	3455000000	9424500	25766000	14197000	1905400000	1421200000	2134200000
A0A0G2JPT2			0	0	0	0	0	0	0	0	0	114020000	62669000	0
A0A0G2JPT5;O75943-2;O75943;A0A0G2JNH5;A0A0G2JP78;O75943-3;O75943-4;H0Y9T7;A0A0G2JP31;H0Y9J8;D6RAW6	Cell cycle checkpoint protein RAD17	RAD17	32097000	43085000	44254000	28563000	19071000	22018000	44253000	39801000	39713000	40406000	41503000	36049000
Q12979;Q12979-2;Q12979-4;A0A1C7CYZ0;A0A0G2JQ41;B7Z683;Q12979-3;I3L2P5;I3L1U8;I3NI05;I3L3W0;A0A0G2JRJ1;I3L379;I3L2C0;I3L0R7;A0A0G2JQB5;A0A0D9SGD7;I3L4Y1;A0A0G2JQT5;A0A0G2JSE0	Active breakpoint cluster region-related protein	ABR	317570000	307810000	345600000	405720000	470980000	515900000	369150000	353600000	356730000	539600000	524180000	518640000
Q8NF37;A0A0G2JQ62;A0A0G2JRI7	Lysophosphatidylcholine acyltransferase 1	LPCAT1	22444000	14417000	30879000	39785000	48048000	50893000	11380000	19578000	14541000	20731000	0	0
F6RP06;A0A0J9YW18;Q12983	BCL2/adenovirus E1B 19 kDa protein-interacting protein 3	BNIP3	124450000	91163000	92091000	47049000	34178000	38637000	75875000	87663000	75783000	31803000	0	30740000
E9PJ24;B7ZM65;F8WEF5;A0A0J9YYB5;A0A0J9YWD5;Q9P1Y6-3;Q9P1Y6;A0A0J9YX88;Q9P1Y6-2	PHD and RING finger domain-containing protein 1	PHRF1	43063000	40332000	33935000	50297000	44722000	46050000	30874000	43237000	39616000	44253000	47662000	67149000
A0A0J9YYA0;A0A0J9YWG3;B7Z1Y6;Q9UHC6-2;Q9UHC6	Contactin-associated protein-like 2	CNTNAP2	0	15404000	20949000	0	0	0	18075000	19743000	0	0	0	0
A0A0J9YWR7;A0A0J9YXE4;Q8N2F6-4;Q8N2F6-3;Q8N2F6-2;Q8N2F6;H7C2M7;Q8N2F6-6;Q8N2F6-5;A0A0J9YXV5;C9J5N7;A0A0J9YY38;H7BXQ8	Armadillo repeat-containing protein 10	ARMC10	103750000	84339000	92820000	128060000	93145000	127120000	82440000	106080000	69564000	116470000	101410000	126520000
X6RFI8;A0A0J9YWV4;O75154-2;O75154;O75154-3;Q86YS3-2;Q86YS3	Rab11 family-interacting protein 3	RAB11FIP3	47626000	54906000	33048000	0	0	0	51777000	44525000	69323000	0	0	0
A0A0J9YX62;O75190-3;O75190;C9J2C4;O75190-2;E9PH18;O75190-4;C9JB42;C9JDR7;C9JDX6;F8WCZ4;C9J2P2;C9JN01;Q8NHS0;Q8WWF6	DnaJ homolog subfamily B member 6	DNAJB6	113700000	134680000	126630000	189530000	176860000	166660000	87862000	168540000	153880000	138750000	89833000	185880000
A0A0J9YXZ0;A0A0J9YXE3;J3QQP1;A0A0J9YXX3;J3KS66;J3QLB2;J3KRX2;J3QS49;Q8N1S5-2;Q8N1S5	Zinc transporter ZIP11	SLC39A11	37425000	24552000	42290000	0	0	49670000	16784000	25148000	26006000	58210000	0	0
A0A0J9YXF2;A0A0J9YYG4;Q15165;J3QT77;Q15165-3;Q15165-1;G3XAK4;A0A0J9YXU7;A0A0J9YYJ1;A0A2Q2SAK4;A0A0J9YXM1;A0A0J9YYF0;A0A0J9YYF3	Serum paraoxonase/arylesterase 2	PON2	4000200000	2759900000	3999900000	5754600000	6210500000	6052300000	2529800000	3849900000	2818700000	4432900000	4872600000	5218400000
A0A0J9YXM6;Q562E7;Q562E7-4;E9PDG3;Q562E7-2;Q562E7-6;Q562E7-5;Q562E7-3;C9JD20;I3L3U7	WD repeat-containing protein 81	WDR81	138530000	164090000	160250000	101610000	125390000	102560000	174750000	194790000	168620000	94033000	83599000	82420000
H0Y8D1;A6XMV8;CON__P07477;A0A0J9YYC8;E7EQ64;A6XMV9;Q8NHM4;P07478;P07477	Putative trypsin-6;Trypsin-2;Trypsin-1;Alpha-trypsin chain 1;Alpha-trypsin chain 2	PRSS1;PRSS3P2;PRSS2	394970000	369480000	506400000	605760000	1686400000	1385600000	214000000	451680000	427780000	191700000	398540000	288680000
A0A0J9YYJ0;Q8N129	Protein canopy homolog 4	CNPY4	97544000	77574000	95182000	70705000	41777000	53734000	83315000	75303000	101420000	67283000	67145000	41570000
P43243;A0A0R4J2E8;A8MXP9;D6REM6;D6R991;B3KM87;H0Y8T4;Q68E03;D6R8Z5;D6RCM3;D6REK4;D6RBI2;D6RE02;D6RIA2;D6RB45;A0A1B0GX04;D6RBS2;D6RAY2;D6RAM9;D6R9F3;D6RBK5	Matrin-3	MATR3	17901000000	18679000000	17521000000	20974000000	18751000000	19965000000	19473000000	18913000000	19502000000	20237000000	18319000000	19667000000
Q9NY35;H0Y8T9;D6RCR8;D6RDI6;D6RFX6;D6RCE6;D6R9S8;D6RC11;D6RA76;D6RDY1;D6RHU6;D6RDP6;D6RIU2;A0A0R4J2F2;Q9NY35-2;D6RD48;D6RCP3;D6RAZ7;D6RB31;Q9NY35-3;D6R9K1	Claudin domain-containing protein 1	CLDND1	53828000	41909000	55585000	62134000	68679000	63403000	48984000	65928000	62319000	65585000	76507000	17689000
A0A0R4J2F6;Q12894;Q12894-2;H7C444	Interferon-related developmental regulator 2	IFRD2	18087000	12039000	16516000	0	0	0	15481000	0	17321000	0	0	0
A0A0R4J2G3;Q6PIU2;A0A0A0MTJ9;Q6PIU2-2;Q6PIU2-3;H7C046;F8WE33	Neutral cholesterol ester hydrolase 1	NCEH1	834050000	495520000	930880000	3130300000	3472700000	2966300000	522110000	858910000	594510000	2317800000	2371800000	2181200000
A0A3B3ISJ1;A0A0S2Z4L3;P07225;G5E9F8;A0A3B3IRK9;H7BXT0;A0A3B3IUA6;C9K0R0;A0A3B3ITZ7	Vitamin K-dependent protein S	PROS1	2206500000	2129100000	1982700000	193240000	212550000	255510000	1753500000	1555400000	1801200000	135010000	57585000	192470000
A0A0S2Z5D0;H3BUV4;A0A1B0GTU6;Q9NWW5;A0A1B0GW73;H3BNF1;A0A1B0GTV3;A0A1B0GUD2;H3BUT1;H3BRN7;H3BTY4;Q9NWW5-2;A0A1B0GU90	Ceroid-lipofuscinosis neuronal protein 6	CLN6	328030000	185700000	432710000	440250000	551550000	689290000	244300000	471750000	324100000	636480000	560340000	304460000
P04637;P04637-4;A0A0U1RQC9;P04637-3;P04637-2;P04637-6;P04637-5;J3KP33;P04637-7;A0A087WZU8;E7ESS1;P04637-8;A0A087X1Q1;P04637-9;E7EQX7;A0A087WXZ1;A0A087WT22;E9PFT5;E7EMR6;S4R334;E9PCY9	Cellular tumor antigen p53	TP53	121140000	114700000	104470000	314280000	292700000	290030000	138680000	127090000	188550000	340480000	286840000	313080000
A0A494C1M0;A0A0U1RQE4;Q5HYK7-3;Q5HYK7-2;Q5HYK7;Q5HYK7-5;Q5HYK7-4;A0A0U1RQN2	SH3 domain-containing protein 19	SH3D19	141060000	81378000	105120000	113950000	110350000	124100000	87073000	122810000	92557000	114110000	235660000	107740000
A0A0U1RQH7			3519400	4313300	4211200	3222800	0	0	0	0	0	9501000	4280700	0
A0A0U1RQJ8;Q8WXE1-5;Q8WXE1-3;Q8WXE1-2;Q8WXE1	ATR-interacting protein	ATRIP	0	0	0	0	6213800	0	0	0	0	0	0	6171900
H0YMA4;A0A0U1RQM0;Q15004;H0YKX3;A0A0U1RQC1;Q15004-2	PCNA-associated factor	KIAA0101	32726000	27929000	36303000	9125900	7739100	9091000	26977000	30899000	30459000	15627000	15179000	16975000
U3KQA5;A0A0U1RQT7;Q8IXA3;A0A0U1RQY7;U3KQB3;Q9HCP0-2;Q9HCP0;A0A0U1RQG9;A0A0U1RR14;A0A0U1RQK6;A0A0U1RQK2;A0A0U1RR31	Casein kinase I isoform gamma-1	hCG_2004507;CSNK1G1	27059000	27221000	26310000	37799000	38413000	59672000	25855000	25883000	22049000	33150000	39614000	32915000
A0A0U1RR39;A0A1B0GW38;A0A0U1RQX8;P22681	E3 ubiquitin-protein ligase CBL	CBL	199770000	180340000	196340000	236670000	711860000	597160000	297530000	298620000	243000000	98778000	290280000	705180000
Q9Y484-2;Q9Y484-3;Q9Y484;A0A0U1RR06;C9J0A8;C9JYH8;G8JLI5;A0A0U1RQM7;A0A0U1RQG6;H0Y329;A0A0U1RQR1;C9J471;C9JBX7;C9JUS5;C9J7Q8;C9J5L0;A0A0U1RRJ9;A0A0U1RQS7;A6NM71;C9JE01;C9JVT3;A0A0U1RR42;A0A0U1RQJ7;H7C4N7;A0A0U1RRJ2	WD repeat domain phosphoinositide-interacting protein 4	WDR45	65038000	59435000	53979000	59833000	72548000	55495000	77509000	82619000	53702000	47369000	64254000	60580000
P0DPI3;A0A0U1RR11;A0A0U1RRI6			115290000	55852000	69325000	28447000	22035000	19292000	30926000	31950000	39246000	45192000	34220000	43742000
A0A0U1RRB6;Q9Y2D4;J3QT38;Q9Y2D4-2	Exocyst complex component 6B	EXOC6B	58868000	54737000	51976000	65262000	66732000	79429000	78387000	59957000	57215000	69763000	68010000	61539000
A0A0U1RRH6;O94880-2;O94880;B4DG57	PHD finger protein 14	PHF14	215350000	182910000	247310000	263920000	213620000	258800000	234290000	198820000	236950000	316170000	267590000	255560000
F6XEV2;A0A0U1RRK1;A0A286YF11;Q9BPX6-5;Q9BPX6-4;Q9BPX6;Q9BPX6-3;E9PQV6;Q9BPX6-2;S4R3W3	Calcium uptake protein 1, mitochondrial	MICU1	60674000	58866000	63835000	40372000	39857000	0	70623000	76508000	62656000	65922000	63543000	36598000
A0A0U1RRL5;P32519-2;P32519	ETS-related transcription factor Elf-1	ELF1	35984000	34952000	42258000	33366000	33683000	47775000	0	0	46930000	57699000	53892000	45500000
A0A0U1RRL7			0	0	0	11690000	0	0	15840000	0	0	0	0	0
A0A0U1RRL8;Q8TB22-3;Q8TB22;Q8TB22-2	Spermatogenesis-associated protein 20	SPATA20	0	20885000	23602000	39029000	33162000	29537000	20749000	30548000	25182000	27742000	67971000	66501000
A0A0U1RRM4;P26599;P26599-2;P26599-3;A6NLN1;A0A0D9SF20;K7EKJ7;K7EK45;A0A087WU68;K7ELW5;K7ES59;A0A087WUW5;K7EKX4	Polypyrimidine tract-binding protein 1	PTBP1	19158000000	20078000000	18687000000	16849000000	16845000000	17375000000	21451000000	19134000000	19621000000	19470000000	18705000000	20094000000
A0A0X1KG75;Q53SF7-4;Q53SF7-3;Q53SF7-2;Q53SF7;A0A0D9SG04;A0A0B4J1Z0;H7C1G2;C9J8C4;C9JAU3;C9J5Y6;C9JK90;C9JWZ0	Cordon-bleu protein-like 1	COBLL1	1266900000	1361300000	1351900000	553930000	527710000	518100000	1265600000	1626700000	1374200000	822970000	814430000	888390000
Q03518;A0A140T9T7;A0A0S2Z4R8	Antigen peptide transporter 1	TAP1	2573600	2813000	0	15243000000	15021000000	14246000000	4357600	3220500	4560600	1320700000	1652900000	9718200000
E9PQZ5;A0A140TA01;E9PQT8;O43189-2;O43189;A2AB23;A2AB22;A0A087WVG4	PHD finger protein 1	PHF1	27835000	27357000	29367000	106180000	54119000	43940000	24740000	24414000	46690000	36493000	0	28578000
K7EIR2;A0A140TA84;A0A140TA86;Q5XKP0	Protein QIL1	C19orf70;QIL1	41890000	35493000	44691000	44497000	44745000	48147000	57427000	54904000	57486000	59831000	79764000	46591000
A0A182DWF2;A0A182DWF3;Q9NNW7-2;Q9NNW7;A0A096LPK7;D3YTF8;Q9NNW7-3;A0A096LPD9;E7EWK1;Q9NNW7-4;A0A0U1RQX0;A0A096LPH4;A0A096LNY7;A0A096LPB7;A0A096LP96	Thioredoxin reductase 2, mitochondrial	TXNRD2	460050000	534080000	452150000	630280000	680740000	651470000	502430000	409210000	483320000	349610000	224410000	267130000
Q16881-6;A0A182DWI3;Q16881;F8W809;Q16881-3;Q16881-4;Q16881-5;A0A087WSY9;A0A087WSW9;E9PIR7;Q16881-7;E2QRB9;E9PKD3;A0A0B4J225;E9PKI4;E9PLT3;E9PQI3;E9PJU2;E9PRI8	Thioredoxin reductase 1, cytoplasmic	TXNRD1	14132000	0	0	0	0	0	0	0	0	0	18940000	0
A0A182DWI4;E9PN30;Q9BQE4	Selenoprotein S	VIMP	0	0	0	64913000	57017000	91667000	0	0	0	43440000	14765000	57503000
O75787;A0A1B0GWJ8;A0A1C7CYW4;A0A1B0GVW0;A0A1B0GUT7;A0A1B0GVB9;A0A1B0GTB0;H7C3E1;B7Z1I9;O75787-2;A0A1B0GTU8;A0A1B0GVC7;A0A1B0GV24;A0A1B0GU12;B7Z413;A0A1B0GV60;A0A1B0GVI9;A0A1B0GWD6;A0A1B0GW13;H7C240	Renin receptor	ATP6AP2	35806000	35538000	53072000	52496000	44229000	42132000	17582000	37931000	23119000	55704000	66071000	62864000
A0A1B0GTC3;A0A1B0GVH5;Q9C0B1;A0A1B0GUC3;A0A1B0GV98;A0A1B0GTC5;A0A1B0GU26;A0A1B0GTY1;A0A1B0GUY7;A0A1B0GTI3;Q9C0B1-4;A0A1B0GTZ8;Q9C0B1-2;Q9C0B1-3;X6R3I0	Alpha-ketoglutarate-dependent dioxygenase FTO	FTO	652810000	653400000	620110000	489920000	482990000	462180000	674170000	616910000	637480000	550030000	563620000	396400000
P30566;A0A1B0GTJ7;A0A1B0GWJ0;A0A0A6YY92;P30566-2;A0A1B0GWF8;A0A1B0GTG9;A0A096LNY6;A0A096LNY5;A0A096LPA2;A0A096LNY4;A0A096LP72;A0A096LP92;B4DEP1;A0A1W2PRX2;A0A096LP76;A0A096LNT0;V9GY96	Adenylosuccinate lyase	ADSL	4091300000	5034600000	4058400000	3404300000	3850700000	3498800000	4704500000	4172800000	4402500000	3102700000	2584900000	3307700000
A0A494C051;A0A1B0GTK8;Q5GJ75	Tumor necrosis factor alpha-induced protein 8-like protein 3	TNFAIP8L3	9732200	19330000	11725000	23522000	23833000	14965000	9829600	21014000	22458000	36983000	0	0
A0A1B0GTL5;Q9BXF6	Rab11 family-interacting protein 5	RAB11FIP5	173720000	191200000	216970000	272730000	301560000	293830000	243930000	172660000	203690000	302280000	346790000	267080000
Q13510-2;Q13510;A0A1B0GTM3;A0A1B0GUA4;A0A1B0GW68;A0A1B0GUH5;A0A1B0GTZ5;E7EMM4;A0A1B0GUG1;Q13510-3;A0A1B0GUW4;A0A1B0GUE3;A0A1B0GTP7;A0A1B0GVG2;A0A1B0GV06;A0A1B0GUB3;A0A1B0GU62;A0A1B0GVE7;A0A1B0GU06;A0A1B0GVJ1;A0A1B0GW48;A0A1B0GUJ3;A0A1B0GV95;A0A1B0GW66;A0A1B0GVC9;A0A1B0GVA3;A0A1B0GV88	Acid ceramidase;Acid ceramidase subunit alpha;Acid ceramidase subunit beta	ASAH1	2203300000	2629800000	2621800000	5508800000	5718700000	6773600000	3393100000	2942900000	3098600000	4424700000	5689700000	3973200000
A0A1B0GTQ9			0	192710000	0	0	0	0	0	0	0	0	0	0
A0A1B0GTU3;Q96L93-5;Q96L93-6;Q96L93-4;Q96L93;A0A0A0MRC9;Q96L93-2	Kinesin-like protein KIF16B	KIF16B	59124000	61127000	20130000	0	0	11762000	26948000	62587000	0	38194000	18569000	37473000
A0A1B0GTU4;P49023-2;P49023;P49023-3;F5GZ78;P49023-4;A0A1B0GU60;F5H836	Paxillin	PXN	403600000	378280000	343770000	295020000	385640000	377590000	261910000	278020000	306940000	210000000	265000000	236740000
Q9UDY2-7;Q9UDY2;Q9UDY2-3;A0A2R8YDH4;A0A1B0GTW1;A0A3B3ITE1;Q9UDY2-6;A0A3B3IRI3;A0A3B3ISZ5;Q9UDY2-2;Q9UDY2-4;A0A3B3IU51;A0A3B3ISF1;Q9UDY2-5;A0A3B3IRV6;A0A3B3IT83;A0A3B3IS03;A0A3B3IU26;B1AN86;U3KQJ2	Tight junction protein ZO-2	TJP2	5088600000	5110500000	4853800000	2648000000	2230600000	2329100000	4932300000	5187900000	5813800000	2760400000	2648800000	2588200000
Q9H9B1;Q9H9B1-3;A0A1B0GV09;A0A1B0GU48;Q9H9B1-4;A0A0C4DGF8;A0A1B0GW79;A0A1B0GUD1;A0A1B0GVZ8;A0A0D9SEQ1;A0A1B0GWF6;A0A0D9SFX4;A0A0D9SFG7;A0A0D9SER3;A0A0D9SFS4;A0A0D9SEP2;A0A0D9SFD7;A0A0D9SF38;A0A1B0GTP4;A0A1W2PPZ7;A0A0D9SFM6;A0A1B0GV89;A0A0D9SEY2	Histone-lysine N-methyltransferase EHMT1	EHMT1	55347000	88073000	45274000	44281000	52630000	66508000	45001000	33290000	43816000	49515000	42850000	45622000
A0A1B0GUA3;Q96EK5;A0A0D9SFK7;A0A1B0GUH6;A0A1B0GVY9;A0A1B0GTE6	KIF1-binding protein	KIAA1279	62099000	57260000	40234000	37714000	46595000	50576000	0	25708000	34691000	45964000	49762000	42710000
A0A1B0GUA8;Q9H1H9-3;Q9H1H9-4;Q9H1H9-2;Q9H1H9;H0Y9Z7;H0Y307	Kinesin-like protein KIF13A	KIF13A	17855000	31208000	20201000	13580000	11418000	13622000	28900000	28711000	33597000	21355000	11804000	16661000
A0A1B0GUI1;Q6GYQ0;Q6GYQ0-7;Q6GYQ0-5;Q6GYQ0-6;Q6GYQ0-2;Q6GYQ0-4;Q6GYQ0-3;H0YJB5;H0YJ04	Ral GTPase-activating protein subunit alpha-1	RALGAPA1	109530000	103530000	90404000	121370000	116330000	134750000	98170000	83389000	109900000	106220000	121590000	123660000
E9PEZ5;A0A1B0GUL6;Q9UPP5-2;Q9UPP5	Uncharacterized protein KIAA1107	KIAA1107	0	0	0	22522000	16248000	25879000	0	15700000	0	0	0	4402500
A0A1B0GUL7			488560000	284440000	318540000	533170000	0	445500000	118440000	334970000	471570000	0	323290000	286260000
A0A1B0GUN5;Q5VTI5;Q9Y2H5	Pleckstrin homology domain-containing family A member 6	PLEKHA6	70197000	60584000	48544000	52286000	49987000	51351000	50676000	77156000	96983000	66542000	0	47796000
A0A1B0GUS7;O14795;A0A0U1RRL2;A0A0U1RRB5	Protein unc-13 homolog B	UNC13B	37937000	78439000	49638000	14457000	39896000	26723000	44318000	45274000	48012000	21405000	15218000	0
A0A1B0GUZ7;Q14156;Q14156-3;Q14156-2;E5RJS1	Protein EFR3 homolog A	EFR3A	220870000	243400000	274700000	144520000	198470000	104980000	203760000	239590000	258100000	139810000	76931000	118530000
A0A1B0GV47;Q7Z4S6-5;Q7Z4S6-2;Q7Z4S6;Q7Z4S6-4;Q7Z4S6-6;Q7Z4S6-3;H0YHT2;H0YI78;H0YIM7;H0YIM6;H0YHG9;Q2M1P5	Kinesin-like protein KIF21A	KIF21A	1510200000	1097900000	1620100000	734010000	743130000	802490000	957760000	1400200000	1020300000	785820000	574740000	617640000
A0A1B0GV70;Q96N21-2;Q96N21	AP-4 complex accessory subunit tepsin	ENTHD2	0	0	0	10063000	0	10684000	0	0	0	0	0	0
A0A1B0GVD3;Q6ZN17;A0A1B0GTK2;Q6ZN17-2;Q9H9Z2	Protein lin-28 homolog B	LIN28B	1581400000	1609000000	1450300000	2006100000	2062700000	2067800000	1523600000	1389600000	1444200000	1477200000	1368400000	1420900000
A0A1B0GVD5;A0A1B0GWE8;P07339;A0A1B0GW44;A0A1B0GV23;A0A1B0GVP3;A0A1B0GU92;A0A1B0GU03;H7C469;C9JH19;H7C1V0;F8WD96;F8W787;A0A1B0GV01;A0A1B0GVF1	Cathepsin D;Cathepsin D light chain;Cathepsin D heavy chain	CTSD	19163000000	19518000000	19641000000	18905000000	20877000000	20674000000	19201000000	20044000000	18558000000	18296000000	19783000000	17355000000
H3BR03;A0A1B0GVE3;O75808-2;O75808	Calpain-15	CAPN15	0	0	2124900	0	3668900	0	2037600	0	0	0	0	0
A0A1B0GVF3;P23786;A0A1B0GTB8;A0A1B0GWC0;A0A1B0GV75;A0A1B0GTM0;A0A1B0GUD9;A0A1B0GTL9;A0A1B0GUB8	Carnitine O-palmitoyltransferase 2, mitochondrial	CPT2	4176800000	4411800000	4227700000	5608400000	5415900000	5363900000	4562800000	4338000000	4470200000	4985900000	5137100000	4835700000
A0A1B0GVI7;A0A2R8Y7G1;P35869;E5RGQ2;A0A494BZY4;G3V143;E5RFG4;A9YTQ3;A9YTQ3-3;A9YTQ3-2	Aryl hydrocarbon receptor	AHR	105430000	90065000	60147000	122500000	175250000	162060000	81088000	82949000	86966000	247080000	148150000	242360000
A0A1B0GVL4;P78312-6;P78312-2;P78312-5;P78312;E7EUR8;P78312-4;D6RFZ4;P78312-3	Protein FAM193A	FAM193A	36762000	42680000	51840000	103580000	118380000	65233000	57267000	52461000	56469000	81697000	56711000	55048000
A0A1B0GVU6;A0A2R8Y5L7;C9J3I9	Putative uncharacterized protein C5orf58	C5orf58	1285500000	0	30807000	0	662280000	661410000	74850000	94339000	42951000	116440000	24500000	27885000
A0A1B0GVU9;B4DDN1;H7C0R3;A0A0U1RR66;A0A0U1RQQ5;A0A0U1RQX5;A0A1B0GTT3;A0A0U1RRC8;A0A0U1RQX9;A0A0U1RQJ6;A0A0U1RRJ7;A0A0U1RR79		QARS	105120000	0	85697000	49298000	51680000	526670	27199000	61344000	0	0	0	101790000
A0A1B0GVV3;Q5EBL4-2;Q5EBL4;Q5EBL4-3	RILP-like protein 1	RILPL1	9395500	12933000	9776900	18922000	12748000	14454000	10525000	8844600	11674000	18459000	7953900	17785000
A0A1B0GW05;Q2PZI1;H7C3M5;Q2PZI1-2	Probable C-mannosyltransferase DPY19L1	DPY19L1	62689000	63032000	126260000	219260000	205210000	207230000	51307000	117540000	61685000	196700000	126740000	140780000
A0A1B0GW67;A0A1B0GW40;Q99250-2;Q99250;A0A1B0GTX0;F6U291;A0A1B0GTS6;A0A1B0GWA6;P35499	Sodium channel protein type 2 subunit alpha;Sodium channel protein type 4 subunit alpha	SCN2A;SCN4A	15926000	20621000	22572000	175070000	217760000	54391000	48794000	30210000	41654000	489930000	192530000	537600000
E9PEN0;A0A1B0GW41;Q8WYH8-2;Q8WYH8;Q9UNL4-8;Q9UNL4-3;Q9UNL4-4;Q9UNL4-7;Q9UNL4-5;Q9UNL4-6;Q9UNL4-2;Q9UNL4	Inhibitor of growth protein 5	ING5	41579000	44101000	45222000	41527000	42150000	41815000	36158000	36821000	34443000	47966000	41336000	30639000
A0A1B0GWA0;Q8IZM8			8834000	10620000	8889300	18362000	20502000	26056000	7534300	8408900	7918400	0	0	4830400
R4GND1;A0A1B0GX65;Q96LR5;Q969T4;R4GN77	Ubiquitin-conjugating enzyme E2 E2;Ubiquitin-conjugating enzyme E2 E3	UBE2E3;UBE2E2	15789000	18708000	18916000	0	0	29031000	23897000	19906000	26589000	0	0	0
A0A1C7CYX1;A0A0A0MSU2;Q6PJG2;H7C1L3	ELM2 and SANT domain-containing protein 1	ELMSAN1	39271000	56248000	84784000	415260000	409530000	293970000	41507000	17230000	92382000	210910000	213940000	202960000
C9J6N5;C9JQ40;C9JW51;A0A1C7CYX8;Q9H098;X6RET8;C9JP05;C9J3Q3;Q9H098-2;C9JYP1;C9J6Y8;F8WCJ2	Protein FAM107B	FAM107B	134690000	130840000	122060000	107880000	87667000	86042000	139700000	149690000	167040000	139990000	159710000	137220000
A0A1C7CYX9;Q16555-2;Q16555;E5RFU4;H0YBT4;E9PD68;Q14195;Q14194;Q14195-2;Q14194-2	Dihydropyrimidinase-related protein 2	DPYSL2	8002100000	8405300000	8459700000	6325800000	6139100000	5866500000	9273200000	9604600000	9782100000	10058000000	10721000000	9794800000
Q969N2;A0A1W2PNP0;Q969N2-5;A0A1W2PPS0;A0A1W2PPC3;Q969N2-4;A0A1W2PP57;A0A1W2PPR6;A0A1W2PP53;A0A1W2PQN1;A0A1W2PRZ8;A0A1W2PPQ7;Q969N2-2;F6W983;A0A1W2PQ52;Q969N2-6;A0A1W2PQY1;A0A1W2PR92;A0A1W2PP13;Q969N2-3;A0A1W2PRH2;H7C2Y2;A0A1W2PQ29;A0A1W2PRV7;A0A1W2PSC5;A0A1W2PPI8;A0A1W2PRG1;A0A1W2PNW9;A0A1W2PPK4;A0A1W2PRH8;A0A1W2PPU8;A0A1W2PNZ5;A0A1W2PR70;A0A1W2PR73;A0A1W2PQL3;A0A1W2PP98;A0A1W2PR22;A0A1W2PNS2;B7Z…	GPI transamidase component PIG-T	PIGT	736560000	594550000	752840000	1081300000	1210300000	1097000000	649690000	749410000	636370000	1089700000	1041800000	942500000
A0A1W2PNR9;Q9Y5U9	Immediate early response 3-interacting protein 1	IER3IP1	62673000	43136000	67523000	74520000	78503000	66644000	67331000	71990000	45104000	90791000	79796000	79750000
A0A1W2PNV4;E9PF58;F8WFD3		ARPC1A	5194200000	5298200000	6026400000	8798000000	9804700000	9049500000	5758800000	5958400000	6161700000	7421700000	7620000000	6399900000
A0A1W2PNZ9;Q15652-3;Q15652;Q15652-2;H7BXU7	Probable JmjC domain-containing histone demethylation protein 2C	JMJD1C	41717000	43736000	60003000	34007000	35969000	32253000	53204000	41096000	41977000	44458000	34926000	32614000
Q9Y388;A0A1W2PP04;Q5JY83	RNA-binding motif protein, X-linked 2	RBMX2	54683000	57516000	68292000	61768000	65163000	77795000	64507000	49259000	61969000	70233000	79872000	62164000
O14653-3;A0A1W2PPG1;I3L0K1;O14653-2;O14653;I3NI02;A0A1W2PPG5;A0A1W2PPP5;A0A1X7SBU8;A0A1W2PPJ0;I3L4Z6;A0A1W2PRC2;A0A1W2PQM3;A0A1W2PS81;E7EQ34;A0A1W2PRV0;A0A1W2PRL0;A0A1W2PQP2;A0A1W2PNV3;A0A1W2PS12;A0A1W2PRE6;A0A1W2PR23;A0A1W2PRP7;A0A1W2PR02;A0A1W2PQ77;A0A1W2PPW8;I3L1K7;A0A1W2PQ06;A0A1W2PQE0;A0A1W2PQ38;A0A1W2PRD0;A0A1W2PQQ4;A0A1W2PQS3;A0A1W2PP28	Golgi SNAP receptor complex member 2	GOSR2	217620000	195460000	231230000	183930000	202420000	204160000	190960000	243420000	211020000	267710000	165380000	220220000
A0A1W2PPI5;Q5JSJ4	Protein DDX26B	DDX26B	0	0	56158000	0	0	31196000	58483000	50629000	64907000	38139000	0	29230000
A0A1W2PPJ5;Q96SW2-2;Q96SW2;J3QT87;J3QT51	Protein cereblon	CRBN	429000000	432250000	464920000	234400000	265450000	316420000	494030000	424310000	445790000	218480000	173980000	133200000
A0A1W2PPM2;O43766;D6RCP8;A0A1W2PNQ5;A0A1W2PRE7;A0A1X7SBR7;O43766-2;O43766-3;A0A1W2PR81;Q6P5Q6;A0A1W2PQS9;A0A1W2PQE9	Lipoyl synthase, mitochondrial	LIAS	0	0	0	0	0	0	45555000	22122000	25503000	0	0	70711000
A0A1W2PPX5;A0A1W2PQR6;A0A1W2PQB7;A0A1W2PS43;Q14108;A0A1W2PRS1;A0A1W2PPU6;A0A1W2PRF6;Q14108-2;A0A1W2PSE4;A0A1W2PS70;A0A1W2PNX7;D6RDG0	Lysosome membrane protein 2	SCARB2	3107800000	2942400000	3187500000	6476200000	6912600000	7384400000	3355800000	3420300000	3417200000	5130900000	5464600000	5738400000
A0A1W2PPZ5;P23193;A0A1W2PRL9;P23193-2;E5RIS7;E5RJ93;B7Z4S1;E5RK46;A0A1W2PS15;E5RFI1;A0A1W2PPV7	Transcription elongation factor A protein 1	TCEA1	1281700000	1343200000	1273900000	1698300000	1562000000	1714500000	1086900000	979520000	1096800000	1657000000	1645900000	1683500000
A0A1W2PQ14;Q96MM7-2;Q96MM7-3;Q96MM7;Q96MM7-4	Heparan-sulfate 6-O-sulfotransferase 2	HS6ST2	0	0	0	0	0	0	0	0	0	0	0	0
A0A1X7SBZ2;A0A1W2PQ51;Q92841;Q92841-1;Q92841-3;Q92841-2;A0A0U1RQJ0	Probable ATP-dependent RNA helicase DDX17	DDX17	20836000000	20410000000	22069000000	20258000000	19514000000	18424000000	18513000000	19057000000	20535000000	19449000000	19846000000	19428000000
A0A1W2PQ75;O15488-5;O15488-4;O15488-3;O15488-6;O15488-2;O15488;E5RIC9;J3QSZ3	Glycogenin-2	GYG2	172620000	160930000	156040000	93400000	71775000	102900000	115240000	132720000	146060000	72387000	75285000	68319000
A0A1W2PQA9;A0A1W2PS19;O95427;A0A1W2PQZ1;A0A1W2PNH8;A0A1W2PNR0;A0A1W2PQP4;A0A1W2PQR8;A0A1W2PNQ8;A0A1W2PPR7;A0A1W2PRH3;A0A1W2PR74;A0A1W2PPB6;A0A1W2PNW5;K7ELE1;K7EMD7;K7EPJ2;K7EL34	GPI ethanolamine phosphate transferase 1	PIGN	2104200000	1353800000	1785800000	945410000	946190000	1002300000	1802300000	1299800000	1178000000	1612600000	1002600000	1273600000
J3KTD2;A0A1W2PQI7;Q86VV8-2;Q86VV8-4;Q86VV8-3;Q86VV8;J3KT00;A0A1W2PPP3	Rotatin	RTTN	1096300000	921240000	1236000000	452900000	607140000	668910000	1092500000	881780000	997490000	660200000	519790000	640940000
A0A1W2PQS6;F6U211;A0A2R8Y7H1;S4R435;A0A2R8YFH6;A0A2R8Y6L3		RPS10;RPS10-NUDT3	3298500000	3246600000	3795900000	3423600000	3140200000	3239600000	3224500000	4167700000	3887300000	4421400000	4558600000	4301300000
A0A1W2PQT5;P05093;A0A1W2PRY0;A0A1W2PRK7;A0A1W2PQ28	Steroid 17-alpha-hydroxylase/17,20 lyase	CYP17A1	369830000	149380000	479650000	0	0	0	399330000	767030000	522770000	26259000	0	9814800
A0A1W2PQV2;H3BUH9;P23434	Glycine cleavage system H protein, mitochondrial	GCSH	277720000	354870000	305180000	212210000	214830000	232570000	388230000	317140000	428510000	235410000	372830000	267180000
A0A1W2PR06;P52569;P52569-3	Cationic amino acid transporter 2	SLC7A2	757090000	706050000	765480000	767970000	894770000	843790000	704550000	704420000	695990000	708910000	760900000	743510000
F5GYH1;A0A1W2PRM0;A0A1W2PRL5;A0A1W2PR09;Q8NC96;A0A1W2PR27;A0A1W2PPF5;A0A1W2PRQ7;Q8NC96-2;A0A1W2PRW5;F5H2U7;A0A1W2PNT6	Adaptin ear-binding coat-associated protein 1	NECAP1	58549000	51774000	50356000	45685000	44460000	87265000	55399000	48003000	51109000	44626000	0	62968000
F2Z2I2;Q5W015;Q5VX20;A0A1W2PR17;Q16875-3;Q16875-2;Q16875;Q16875-4;A0A1W2PNV9;F6XNB3;F6RAZ1	6-phosphofructo-2-kinase/fructose-2,6-bisphosphatase 3;6-phosphofructo-2-kinase;Fructose-2,6-bisphosphatase	PFKFB3	25876000	22993000	23284000	22659000	21638000	22564000	20950000	23874000	0	0	18526000	0
A0A1X7SBY3;H0Y860;A0A1W2PRA1;Q9P246;Q9P246-2;H7C5C6;H7C5A5;Q9P246-3;H7C5K2;R4GNC5;R4GN82;R4GMP0	Stromal interaction molecule 2	STIM2	23172000	17346000	20816000	84564000	88523000	74646000	12702000	19751000	25291000	23047000	19564000	23074000
A0A1W2PRB8;E9PM72;A0A1W2PS27;Q9NVC6;A0A1W2PS69;A0A1W2PNW7;A0A1W2PQ48;A0A1W2PRX4;A0A1W2PQE4;A0A1W2PNF3;E9PKQ4;A0A1W2PPP8;A0A1W2PR99			1147700000	1135900000	1095000000	987420000	1002200000	1004400000	1497300000	1159900000	1278300000	1274200000	1417700000	1112300000
A0A1W2PRV5;E7EQZ4;Q16637-4;Q16637-2;Q16637-3;Q16637;B4DP61;A0A0G2JRX5;A0A0G2JQN8;A0A0G2JRY6	Survival motor neuron protein	SMN1;SMN2	63070000	100940000	73089000	61295000	72208000	66177000	73316000	72347000	71015000	54914000	92120000	66021000
P53816;A0A1W2PRW4;F5H7E5	HRAS-like suppressor 3	PLA2G16	72315000	0	0	99587000	113620000	112470000	92300000	69983000	85317000	226690000	182280000	192630000
A0A1W2PS05;Q8NEB9;A8MYT4;M0R308;M0R386;A0A0B4J2B1;K7ENH3;K7EIV6;K7EKH3	Phosphatidylinositol 3-kinase catalytic subunit type 3;Phosphatidylinositol 3-kinase	PIK3C3	36784000	37115000	28762000	32515000	34407000	18069000	37085000	41936000	53111000	31602000	0	25101000
Q5SRN7;A0A1W2PS24;Q5SRN5;P04439;A0A0G2JI36;A0A1W2PSE7;A0A0G2JIF2;A0A0G2JL56;P30455;P30443;A0A1W2PQD0;P05534;P30447;P30457	HLA class I histocompatibility antigen, A-3 alpha chain;HLA class I histocompatibility antigen, A-36 alpha chain;HLA class I histocompatibility antigen, A-1 alpha chain;HLA class I histocompatibility antigen, A-24 alpha chain;HLA class I histocompatibility antigen, A-23 alpha chain	HLA-A	0	0	0	74188000	100230000	106040000	0	0	0	0	0	28753000
A0A1X7SBS4;Q99594	Transcriptional enhancer factor TEF-5	TEAD3	177590000	159260000	181860000	228180000	250450000	223590000	113770000	152100000	123110000	340160000	206630000	291980000
C9JF71;C9JFU3;C9JLT7;A0A1X7SBT4;H0Y2P9;Q8TBF5;Q8TBF5-2;F8WEJ3;H7C0F2	Phosphatidylinositol-glycan biosynthesis class X protein	PIGX	0	0	0	14395000	0	17140000	0	0	0	10950000	0	0
A0A286YEX4;P08651-4;P08651-5;P08651-3;P08651-6;P08651-2;P08651;B1AKN6;B1AKN7;B1AKN5;B1AKN8;Q12857-2;Q12857-3;Q12857;Q12857-4	Nuclear factor 1 C-type	NFIC	0	55260000	37370000	123610000	184650000	170910000	37376000	38027000	44736000	160970000	117420000	162920000
A0A286YF22;O43175;A0A2C9F2M7;A0A286YFL2;A0A286YFA2;A0A286YFM8;A0A286YF78;A0A286YFC8;A0A286YFB2;A0A286YER3;A0A286YF34;A0A286YFE1;A0A286YFF3;A0A286YFK5	D-3-phosphoglycerate dehydrogenase	PHGDH	45527000000	46472000000	46980000000	27690000000	30343000000	29578000000	47031000000	45521000000	47842000000	33096000000	34996000000	30856000000
Q9UK22;A0A286YF37;R4GNH2	F-box only protein 2	FBXO2	214160000	250610000	222030000	424240000	426610000	407420000	206930000	211510000	183640000	466730000	521950000	540970000
A0A286YFD6;P31350;P31350-2;C9JXC1;A0A2R8Y837	Ribonucleoside-diphosphate reductase subunit M2	RRM2	1445500000	1697400000	1638600000	342140000	265600000	342470000	1640200000	1699000000	1839600000	792060000	781260000	706230000
A0A2C9F2P4;A0A286YFF7;P50897;Q5T0S4;A0A286YFE3;A0A286YFL8;P50897-2;A0A286YFL6;E9PK48;E9PIA8;E9PSE5	Palmitoyl-protein thioesterase 1	PPT1	1063000000	1000600000	1022000000	1413300000	1536800000	1384500000	904290000	896820000	928740000	1155100000	1406400000	1012900000
A0A2Q2TH77;Q08379;Q08379-2;B7ZC06;A0A1W2PQY5;A0A087WYC0;H0Y7B8	Golgin subfamily A member 2	GOLGA2	1289700000	1267400000	1184900000	1560600000	1362900000	1627400000	1186300000	1206400000	1156100000	1167600000	1023000000	1087100000
Q13555-6;Q13555-11;A0A2Q3DQE3;Q13555;Q13555-2;Q13555-4;Q13555-8;Q13555-7;Q13555-5;Q13555-3;Q13555-9;Q13555-10;Q5SWX3;Q8WU40;H0Y6G2;H7BXS4;H7C394	Calcium/calmodulin-dependent protein kinase type II subunit gamma	CAMK2G	240060000	248490000	263520000	287400000	314180000	314320000	296050000	280700000	261770000	255420000	201640000	226940000
A0A2R8Y1G7;Q9BUX1;A0A0C4DGX1;Q9BUX1-2	Glutathione-specific gamma-glutamylcyclotransferase 1	CHAC1	0	0	0	0	0	0	0	0	0	0	0	0
A0A2R8Y2B1;Q9ULL1	Pleckstrin homology domain-containing family G member 1	PLEKHG1	0	0	0	4494500	7942300	5380300	0	0	1089900	2543000	0	2135100
P42336;A0A2R8Y2F6;C9JAM9	Phosphatidylinositol 4,5-bisphosphate 3-kinase catalytic subunit alpha isoform	PIK3CA	30106000	44948000	29335000	64498000	83334000	51178000	38052000	37646000	46515000	134470000	189730000	49123000
A0A2R8Y3M9;G3XAM2;E7ETH0;P05156;A0A087X0I2;A0A0C4DGC6;Q9BZM1	Complement factor I;Complement factor I heavy chain;Complement factor I light chain	CFI	13490000	14592000	16545000	0	24365000	24932000	26497000	16136000	20247000	0	0	0
H0YJW4;G3V4C4;A0A2R8Y3T0;A0A2U3TZE7;O43405-2;O43405;G3V5X3	Cochlin	COCH	0	0	0	0	0	0	0	0	0	0	14646000	0
A0A2R8Y7U5;A8MST6;A0A2U3TZI9;A0A2R8Y5W6;A0A2R8Y432;A0A2R8YCP0;A0A2R8Y7A4;Q5JTW2;Q5JTW2-3;Q5JTW2-5;Q5JTW2-2;A0A2R8Y589;A0A2R8Y4C1;A0A2R8YFB0;A0A2R8Y7M8	Centrosomal protein of 78 kDa	CEP78	92699000	97216000	85443000	23483000	18376000	34917000	73194000	69343000	72556000	44060000	66586000	41674000
A0A2R8Y620;A0A2R8Y7U2;A0A2R8Y600;A0A2R8Y455;Q86VX2-2;Q86VX2;V9GY66	COMM domain-containing protein 7	COMMD7	77337000	62533000	73449000	44044000	73808000	57046000	77694000	80905000	38381000	65336000	24545000	73048000
A0A2R8Y5E4;A0A2R8YFK2;A0A2R8Y6M6;A0A2R8Y4C2;A0A2R8YFS8;A0A2R8Y8C4;A0A2R8Y5C9;A0A2R8Y596;P56945-4;P56945-5;P56945-8;P56945;P56945-7;P56945-3;P56945-2;P56945-6	Breast cancer anti-estrogen resistance protein 1	BCAR1	60912000	96726000	0	109340000	108920000	154140000	56911000	66213000	55188000	87742000	84077000	77228000
A0A2R8Y4H2;B1AHR1;Q9UH03-2;Q9UH03	Neuronal-specific septin-3	2003-09-01	382690000	456630000	391230000	294140000	331830000	218130000	239430000	317480000	275660000	302010000	229030000	316050000
P51532-5;P51532;P51532-4;P51532-3;P51532-2;A0A2R8Y7S2;A0A2R8Y4P4;Q9HBD4;A0A0A0MT49;A0A2R8YGG3;A0A2R8Y440;A0A2R8YG32;A0A2R8Y4C5;A0A2R8Y7F3;A0A2R8Y6N0;A0A2R8Y526;A0A2R8YF80;A0A2R8Y7Y7;A0A2R8Y6V2;A0A2R8YF58;A0A2R8YDA1;A0A2R8YGP5;A0A2R8Y523;A0A2R8Y5K3;A0A2R8YCY3;A0A2R8YFV8;K7EQF0;A0A2R8Y4R6;A0A2R8YFK5;K7EP28;A0A2R8YF38;A0A2R8Y7R0;A0A2R8Y583	Transcription activator BRG1	SMARCA4	2597500000	1890600000	2809700000	2670100000	2526700000	2839000000	1561100000	2415000000	1830800000	2811500000	2476600000	2634200000
E9PGF5;E9PF55;A0A494C067;A0A2R8Y4T1;Q9HBL0;H0Y4U1;A0A087WWW7;C9JI43;E7EMG1;E7ERH1;Q9HBL0-2;C9JFT7;C9J8K5	Tensin-1	TNS1	0	14191000	10262000	0	0	0	189490000	55853000	52667000	0	0	0
A0A2R8YFL3;A0A2R8Y7R1;A0A2R8Y4U4;P15260	Interferon gamma receptor 1	IFNGR1	0	23606000	33966000	144950000	130760000	81128000	29150000	24952000	29897000	69677000	123390000	107960000
A0A2R8Y4W2;A0A2R8YE63;Q12929;Q12929-2;F5H0R8;F5GYM8;F5H3Q6;H0YFG1;F5H1B5;F5H2B8	Epidermal growth factor receptor kinase substrate 8	EPS8	711980000	706340000	672380000	811390000	880960000	894710000	712890000	732000000	681420000	831940000	889190000	776380000
A0A2R8Y726;A0A2R8Y7B8;A0A2R8Y4Y7;A0A2R8YFW4;Q9UQ90;A0A2R8YDQ1;A0A2U3TZH1;A0A2R8Y6K2;A0A2R8YGZ0	Paraplegin	SPG7	184960000	152710000	206150000	199350000	173820000	202830000	172770000	176230000	173120000	152990000	193600000	176030000
A0A2R8Y7W5;A0A2R8Y4Z0;Q14004-2;Q14004;A0A2R8YF61;A0A087X209;A0A2R8Y644;Q9BVE2;A0A2R8YD28;A0A2R8YEB7	Cyclin-dependent kinase 13	CDK13	290460000	245810000	209410000	219700000	217980000	193980000	226280000	190480000	216440000	246940000	186600000	233460000
A0A2R8Y4Z8;Q9Y3X0;M0QYB4;M0QZR0;M0R2W0	Coiled-coil domain-containing protein 9	CCDC9	226960000	232920000	220240000	305010000	317080000	347880000	212680000	208910000	245050000	279190000	269450000	224470000
H3BV07;A0A2R8Y518;H3BNU1;Q9ULP9-2;Q9ULP9;A0A0D9SFR5;H3BQ06	TBC1 domain family member 24	TBC1D24	129110000	142560000	160650000	108410000	116130000	136980000	141260000	100160000	129870000	88850000	57115000	187840000
A0A2R8Y524;O00462;A0A2R8YEC9;E9PFW2;A0A2R8Y4U7;A0A2R8YCE9;A0A2R8YE79;A0A2R8Y7N1;A0A2R8Y211;A0A2R8Y7A7;A0A2R8Y7A0	Beta-mannosidase	MANBA	155340000	244750000	176910000	560480000	625630000	564740000	297480000	255540000	222840000	643710000	619720000	554050000
P35222;A0A2R8Y804;A0A2R8YCH5;A0A2R8Y543;A0A2R8Y5A3;B4DGU4;A0A2R8Y750;A0A2R8Y7Z0;A0A2R8Y5C3;A0A2R8Y5Z1;A0A2R8Y6G0;A0A2R8Y815;E7EMJ5;A0A2R8YG06;E7EV28;E9PDF9;C9IZ65	Catenin beta-1	CTNNB1	7729500000	8337300000	7732800000	5962400000	5737400000	5484700000	9093300000	9081000000	9252900000	8832300000	9283800000	9420800000
A0A2R8Y566;Q9P260-2;Q9P260;A0A075B785;A0A075B768	LisH domain and HEAT repeat-containing protein KIAA1468	KIAA1468	565750000	699010000	599320000	609440000	605180000	550860000	483560000	531780000	558100000	519140000	661250000	637760000
A0A2R8Y575;Q5VVD7;Q8IWE5	Pleckstrin homology domain-containing family M member 2	PLEKHM2	0	0	0	37658000	0	0	0	12700000	9589900	15025000	0	0
A0A2R8Y595;A0A2R8YFL0;P49711;P49711-2;A0A2R8Y6Z6;A0A2R8Y6C1	Transcriptional repressor CTCF	CTCF	765410000	609610000	808020000	914990000	792420000	832740000	350110000	804680000	653320000	724520000	588790000	776210000
A0A2R8Y5A6;A0A2R8YDM9;Q99700;Q99700-2;Q99700-4;A0A2R8Y7E6;V9GY86;F8WB06;A0A2R8Y7P6;H0YH87;F8VQP2;Q99700-5;F8W0B5;F8VRK6;F8VVY6;A0A2R8YGV1;F8WB05;A0A2R8Y6W7	Ataxin-2	ATXN2	878900000	691340000	667830000	903640000	867330000	935160000	587080000	621080000	609590000	667130000	553070000	656830000
A0A2R8Y5B5;O60779	Thiamine transporter 1	SLC19A2	47381000	25831000	85261000	30206000	0	0	53322000	56491000	53026000	0	57223000	0
A0A2R8Y5H9;Q8IVT5-2;Q8IVT5	Kinase suppressor of Ras 1	KSR1	0	2972000	0	5499000	9558200	10245000	1718800	1719200	1859400	2629700	0	2693000
A0A2R8YEM0;A0A2R8Y5L0;A0A2R8Y5Q6;F2Z3M0;A0A2R8Y6M5;E9PPN1;H0YCV5;A0A2R8Y7T8;A0A2R8YG40;A0A2R8YDU8;A0A2U3TZM3;A0A2R8Y6A4;A0A2R8Y6B3;Q8WW01-2;Q8WW01	tRNA-splicing endonuclease subunit Sen15	TSEN15	28136000	26560000	20782000	27289000	28142000	34491000	22639000	24541000	28568000	34399000	0	40638000
A0A2R8YFV7;A0A2R8Y5N2;A0A2R8Y5S3;Q92574-2;Q92574;A0A2R8Y6S1;A0A2R8YEH9;A0A2R8Y5M3;A0A2R8YGX7;A0A2R8YD74;Q86WV8;A0A2R8Y7E9;A0A2R8Y6W1;Q59IT9	Hamartin	TSC1	0	54150000	57508000	40587000	41694000	53979000	37804000	42138000	40643000	0	0	34183000
A0A2R8Y6I1;A0A2R8Y5P7;P49590-2;P49590;A0A2R8Y3N3;B4DQ67;D6RB22;D6RJE6;A0A2R8Y4X6;A0A2R8Y5E8	Probable histidine--tRNA ligase, mitochondrial	HARS2	0	0	0	0	61854000	36600000	48118000	0	45400000	0	158640000	0
Q9Y5P4-3;Q9Y5P4;Q9Y5P4-2;A0A2R8Y5S9;A0A2R8YEK8;A0A2R8Y7Q9;A0A2U3TZL3;A0A2R8Y7C5;A0A2R8YE18;A0A2R8Y5H3;A0A2R8YE59;A0A2R8YEA4;A0A2R8YFI2;A0A2R8YFA1;A0A2R8YCI0;A0A2R8YDX6;A0A2R8Y773;H0Y9J1	Collagen type IV alpha-3-binding protein	COL4A3BP	422670000	369220000	303610000	253330000	225870000	196590000	280140000	250900000	306210000	225090000	209220000	226640000
A0A2R8Y653;Q9BZX2;Q9BZX2-2	Uridine-cytidine kinase 2	UCK2	145160000	170640000	204130000	0	141810000	0	218300000	178270000	208300000	95614000	204510000	194930000
A0A2R8Y661;A0A2R8YGD3;Q9Y4G8;H0Y8N8	Rap guanine nucleotide exchange factor 2	RAPGEF2	84372000	100780000	118960000	94610000	94051000	93519000	84325000	98347000	91619000	77052000	148400000	109530000
A0A2R8Y6F3;Q9P2P5;A0A2R8YE75;Q9P2P5-2	E3 ubiquitin-protein ligase HECW2	HECW2	28452000	24493000	0	0	0	27639000	17607000	28143000	28602000	25779000	0	17692000
A0A2R8Y7W8;A0A2R8Y6W5;Q16626	Male-enhanced antigen 1	MEA1	51429000	59000000	61861000	42340000	35668000	37149000	53631000	46794000	47132000	47696000	49291000	66102000
A0A2R8Y6W8;P19447;A0A2R8Y5L2;A0A2R8YES7;H7C309;A0A2R8Y5H0;A0A2R8YFS3;A0A2R8Y762;A0A2R8Y4R8;A0A2R8Y681	TFIIH basal transcription factor complex helicase XPB subunit	ERCC3	107100000	90381000	90443000	121120000	108440000	168820000	98828000	99842000	81530000	99154000	94069000	137940000
A0A2R8Y6Y7;Q9P2R7-2;Q9P2R7;A0A2R8YDQ9;Q5T9Q5;A0A2R8Y5P6;A0A2R8Y6E6;A0A0U1RQF8;Q5T9Q8;A0A0U1RRI1;A0A0U1RQU7;A0A2R8Y5P4;A0A0U1RQL1	Succinyl-CoA ligase [ADP-forming] subunit beta, mitochondrial	SUCLA2	493480000	514780000	505600000	532070000	739400000	583080000	520110000	481980000	566010000	510070000	516560000	541980000
Q13136;A0A2R8Y7R9;Q13136-2;E9PJZ7;H0YDW2;O75334;O75334-3;O75334-4;G3V200;H0YEF9;O75334-5;O75334-6;H0YHK3;A0A1B0GVT3;O75334-8;O75334-7;O75334-2;O75335;E9PPF6;H0YD72;B1APN9;M0QZB5;H0YHJ4;O75145-2;O75145;R4GNF1;O75335-2;H0YIJ4;O75335-1;E9PID5;H0YF15;A0A3B3ITS2;H0YH95;F8VWR9	Liprin-alpha-1	PPFIA1	617370000	721490000	625760000	580160000	555290000	512450000	623640000	683610000	644170000	666870000	621980000	686640000
A0A2R8Y7V5;P38398-8;P38398-4;P38398;P38398-7;H0Y850;K7EPC7;H0Y8B8;B7ZA85;E7EUM2;Q5YLB2;P38398-6;P38398-5;P38398-3	Breast cancer type 1 susceptibility protein	BRCA1	0	0	1983300	0	0	0	1976300	1938800	1817200	3435800	0	1713500
P49815;P49815-5;A0A2R8YDZ2;A0A2R8Y7X5;A0A2R8YDR3;H3BMQ0;X5D2U8;P49815-3;P49815-2;P49815-4;P49815-7;P49815-6;A0A2R8YGD6;A0A2R8Y5F1;A0A2R8YGU4;A0A2R8Y7C8;A0A2R8Y6C9;H3BQK4;A0A2R8YEJ8;A0A2R8YGE6;A0A2R8Y5B2;A0A2R8Y670;P49815-8;Q5HYF7;A0A2R8Y692	Tuberin	TSC2	164750000	144140000	157080000	104120000	78335000	119000000	151180000	159690000	167440000	136760000	0	73857000
P62263;A0A2R8Y811;E5RH77	40S ribosomal protein S14	RPS14	9212200000	7882200000	10627000000	9823600000	10774000000	10217000000	8444800000	9380000000	8603400000	8576400000	10985000000	9445500000
P08237-3;P08237;A0A2R8Y891;P08237-2;F8VZI0;F8VNX2;F8VZQ1;F8VX13;F8VP00;F8VSL1;F8W1J8;F8VUB8;F8VYK8;F8VW30;F8VTQ3;F8VSF7;F8VVE3;H0YHB8	ATP-dependent 6-phosphofructokinase, muscle type	PFKM	3878500000	3814500000	4041900000	3789200000	3997400000	3746800000	3712400000	3973600000	3741000000	3186200000	3186600000	3084500000
Q5THU2;Q5T2H3;A0A2R8YCJ8;Q9NVV5-6;Q9NVV5-5;Q9NVV5-3;Q9NVV5-2;Q9NVV5	Androgen-induced gene 1 protein	AIG1	85725000	34841000	119400000	59797000	76058000	64617000	53786000	77948000	33316000	37257000	0	0
A0A2R8YCL1;Q13322-3;Q13322-2;Q13322-4;Q13322	Growth factor receptor-bound protein 10	GRB10	25932000	17552000	23784000	21997000	35524000	27480000	24577000	39610000	27944000	40770000	0	22785000
P68400;E7EU96;A0A2R8YD58;A0A2R8Y5A0;Q8NEV1;A0A2R8YFU2;A0A2R8YDP2;A0A2R8YF43;P68400-2;A0A2R8Y4H0;A0A2R8Y4D6;A0A2R8YDY7;V9GYA2;V9GYW6;A0A2R8YEW1;A0A087WY74;A0A2R8Y7T1;A0A2R8YCK2;A0A2R8YF47;V9GY80;A0A2R8YEL7;A0A2R8Y797;A0A2R8Y3W6;A0A2R8YCC9	Casein kinase II subunit alpha;Casein kinase II subunit alpha 3	CSNK2A1;CSNK2A3	3275600000	3421500000	2919500000	3597500000	3302700000	3489900000	3424700000	3919100000	3834300000	3869300000	3564600000	3427000000
A0A2R8YD63;Q92547	DNA topoisomerase 2-binding protein 1	TOPBP1	39891000	35010000	30962000	0	0	43009000	24280000	48306000	49698000	32308000	22669000	24136000
F8W1P7;P49281-5;P49281-2;A0A2R8YD71;P49281-3		SLC11A2	19022000	24632000	40985000	0	0	0	0	19055000	0	0	0	0
H7BXF5;A0A2R8YDB8;Q9H0E3;Q9H0E3-3;Q9H0E3-2;C9J683;C9JTJ5	Histone deacetylase complex subunit SAP130	SAP130	184140000	167920000	171540000	166610000	160910000	158700000	106930000	138000000	173500000	146940000	138930000	121420000
A0A2R8YDD6;O15265;O15265-2	Ataxin-7	ATXN7	0	1109400	954230	1450400	0	1156100	0	0	0	1386500	1371200	0
B5MCJ9;A0A2R8YEA1;O15016-2;O15016	Tripartite motif-containing protein 66	TRIM66	0	0	0	804040000	793040000	864750000	0	0	0	622110000	457790000	0
A0A2R8YEM2;P51946;D6RHI7;D6RG18	Cyclin-H	CCNH	226940000	260650000	261740000	264030000	241950000	219630000	288680000	265170000	308690000	340690000	277830000	327390000
A0A2R8YF49;A0A2R8YFR7;Q12774;H0Y895;Q12774-2;A0A2R8Y614;A5YM69	Rho guanine nucleotide exchange factor 5	ARHGEF5	43726000	53092000	43803000	74136000	47277000	57096000	42542000	42464000	48424000	54423000	47576000	37583000
A0A2R8YFH5;Q15437;Q5QPE2;Q5QPE1	Protein transport protein Sec23B	SEC23B	170480000	212260000	177210000	208250000	223730000	215750000	230240000	241010000	189740000	224570000	240050000	271150000
A0A2R8YG22;C9J1D1;Q8WTS1	1-acylglycerol-3-phosphate O-acyltransferase ABHD5	ABHD5	12996000	19789000	22649000	23927000	25988000	0	0	25920000	22618000	19116000	35583000	31085000
A0A2R8YG42;Q14155-5;Q14155-1;B1ALK7;Q14155-6;Q14155;Q14155-3;Q14155-2;E7EUY6;E9PDQ5;Q15052;Q15052-2;C9JDI6;B1ANY6;E7EU80;E7ENL8;F6SJA5;C9JAD7	Rho guanine nucleotide exchange factor 7	ARHGEF7	452490000	508820000	457120000	532640000	451190000	554820000	516200000	456950000	432570000	487620000	514240000	355540000
A0A2R8YGH5;P61966;H7C1E4;P61966-2;H7BZG6;H0Y673;F6SFB5;A6NH01;P56377;P56377-2	AP-1 complex subunit sigma-1A	AP1S1	576340000	580290000	632720000	590200000	604740000	627720000	689390000	693340000	653830000	760480000	1027800000	877970000
A0A2R8YH03;Q5VWN6;Q5VWN6-2	Protein FAM208B	FAM208B	66762000	72040000	73606000	48996000	48788000	47989000	67291000	52210000	57903000	75411000	65410000	71442000
Q9BZV2;A0A2R8YHG5;A0A2R8YFC5	Thiamine transporter 2	SLC19A3	516760000	487220000	571860000	138790000	157320000	189370000	533570000	526970000	583270000	201590000	253780000	229960000
E9PNW4;A0A2U3TZL5;P13987;P13987-2;H0YET2	CD59 glycoprotein	CD59	401540000	323200000	395240000	384990000	466320000	493010000	270660000	361190000	407830000	270350000	303640000	211180000
A0A2U3TZL8;H7BYN4;Q02241-2;Q02241;Q02241-3;H0YME6;A0A2R8Y531;H0YMJ4	Kinesin-like protein;Kinesin-like protein KIF23	KIF23	259100000	192650000	270110000	130320000	74356000	151820000	149230000	199090000	187880000	258900000	188390000	258870000
A0A2U3TZR0;Q9UBP0-3;Q9UBP0;A0A2R8YGN6;A0A2R8Y481;A0A2R8YCL5;A0A2R8Y5N9;A0A2R8YFC9	Spastin	SPAST	141650000	115810000	128110000	130950000	122670000	98109000	119410000	145320000	133290000	49754000	111740000	104240000
A0A384DVK4;A0A087X0M0;Q7Z5L2-2;Q7Z5L2;Q7Z5L2-3	Coiled-coil domain-containing protein R3HCC1L	R3HCC1L	27490000	32161000	38884000	47845000	56974000	54160000	37849000	37887000	27992000	55202000	52029000	64843000
A0A384DVU0;Q8IY17-5;Q8IY17-2;Q8IY17-3;Q8IY17;M0R2K2;M0R2C2;M0QYF5;M0QZK5;M0R2H4;M0QYT1;A0A2R8Y7E1	Neuropathy target esterase	PNPLA6	97879000	57895000	90762000	149560000	172760000	144080000	51433000	66988000	60583000	148560000	60948000	94992000
V9GYY3;A0A384N5Y3;F5H2F4;P11586;V9GZ78;A0A494C1T2;V9GY75	C-1-tetrahydrofolate synthase, cytoplasmic;Methylenetetrahydrofolate dehydrogenase;Methenyltetrahydrofolate cyclohydrolase;Formyltetrahydrofolate synthetase;C-1-tetrahydrofolate synthase, cytoplasmic, N-terminally processed	MTHFD1	6080000000	6711800000	6342400000	3830100000	3887700000	4206900000	7199100000	6916200000	7411200000	4972100000	5122000000	4968600000
A0A3B3IPE9;Q6ZSZ5-2;Q6ZSZ5-1;Q6ZSZ5-6;Q6ZSZ5-5;Q6ZSZ5;A0A087WZG4;M0QZS0	Rho guanine nucleotide exchange factor 18	ARHGEF18	234420000	210370000	227950000	173430000	202480000	183340000	257280000	245990000	240270000	219870000	229470000	243620000
Q9BY41-5;A0A3B3IRV1;A6NGJ7;A0A3B3ISJ4;A0A3B3IS68;A0A3B3IT04;A0A3B3ITZ3;A0A3B3IRI9;A0A3B3IRP8;E7EVA8;A0A3B3IT84;A0A3B3IT30;A0A3B3ISS7;A0A3B3IT95;A0A3B3ISE4;A6NMT1;A0A3B3IRZ8;A0A3B3IU62;Q9BY41;Q9BY41-4;A0A3B3IRZ0;A0A3B3IU01;A6NFW1;Q9BY41-6;A0A3B3IU21;A0A3B3IS93;A6NGT0;A0A3B3ITV2;Q9BY41-8;A0A3B3IS37;A0A3B3IRJ3;A0A3B3IRJ8;A0A3B3ISY0;Q9BY41-7;A0A3B3ITT6;E7EW22;A0A3B3IUD1;F8WCG4	Histone deacetylase 8	HDAC8	0	0	22214000	25740000	27388000	33344000	0	0	14733000	22805000	24031000	26142000
A0A3B3IRL2;O75629	Protein CREG1	CREG1	79793000	66747000	71295000	50821000	39043000	69939000	49616000	75615000	72972000	12920000	70194000	50493000
A0A3B3ISJ7;A0A3B3IRN6;A0A3B3ITZ5;Q9HCK1;A0A3B3ISF7;N0DVX5;A0A3B3ISN5	DBF4-type zinc finger-containing protein 2	ZDBF2	0	0	0	95575000	54621000	149130000	0	50212000	38380000	0	0	54454000
A0A3B3IRR6;A0A3B3IT54;A0A3B3ITA3;Q9H7E9;Q9H7E9-2	UPF0488 protein C8orf33	C8orf33	123300000	76867000	101760000	57911000	64088000	63576000	43925000	82584000	77726000	54624000	50419000	47829000
A0A3B3IRT8;P43307;C9J3L8;C9J5W0;E9PAL7;C9IZQ1;P43307-2;C9JBX5	Translocon-associated protein subunit alpha	SSR1	937060000	788350000	1535200000	2029700000	1711400000	2041600000	777770000	1055500000	732260000	1530900000	2553500000	1442300000
A0A3B3IRW4;Q02446	Transcription factor Sp4	SP4	0	0	0	0	0	0	0	0	0	0	0	0
P06400;A0A3B3IS71;A0A2R8YFL6	Retinoblastoma-associated protein	RB1	210110000	183050000	236870000	179810000	159370000	196000000	182380000	212880000	216270000	222920000	153430000	270870000
A0A3B3IU75;A0A3B3IUC8;Q5T3L7;A0A3B3ISX6;Q5T3L8;A0A3B3IS76;A0A3B3ISL9;Q5T3L9;A0A3B3ITJ2;A0A3B3ISM6;P10746	Uroporphyrinogen-III synthase	UROS	0	0	0	0	0	19054000	0	0	0	0	0	23026000
Q53S60;A0A3B3IS78;O95342;A0A3B3ISD4	Bile salt export pump	ABCB11	0	0	0	0	35427000	62227000	25931000	29113000	6430800	10461000	0	58068000
A8MW50;A0A3B3IS95;P07195;C9J7H8;F5H793	L-lactate dehydrogenase;L-lactate dehydrogenase B chain	LDHB	0	0	0	60712000	66762000	40638000	0	0	0	28362000	0	17925000
A0A3B3ISF0;Q659C4;Q659C4-9;Q659C4-2;G3V0E9;H0Y9K3;D6R9W6;A0A3B3IT29;A0A3B3ISF8;D6RJB0;Q659C4-3;Q659C4-4	La-related protein 1B	LARP1B	21335000	20301000	28844000	21469000	18704000	26421000	14496000	25138000	26502000	15152000	39143000	11997000
A0A3B3ISF6;Q96G42	Kelch domain-containing protein 7B	KLHDC7B	13683000	0	4958700	1658000000	2591600000	5156200000	64828000	38624000	47986000	1131200000	671820000	1084600000
B4DKB2;A0A3B3ISF9;P42892-3;P42892-4;P42892;P42892-2;E9PJG1;E9PN99;E9PHZ1	Endothelin-converting enzyme 1	ECE1	367190000	385530000	364550000	412560000	409600000	333980000	314900000	331120000	345390000	345390000	281450000	338960000
A0A3B3ISG5;P14735;P14735-2;Q5T5N3	Insulin-degrading enzyme	IDE	7924000000	8195300000	8028100000	6655800000	6922100000	7563900000	8447200000	8534300000	8398100000	6521400000	6976000000	5648800000
F5H2D0;A0A3B3ISR2;B4DPQ0;P00736;A0A3B3ITU4;F5H1V0;F5H6Y3;F5H3N3	Complement C1r subcomponent;Complement C1r subcomponent heavy chain;Complement C1r subcomponent light chain	C1R	0	0	0	71982000	52538000	75319000	0	0	0	0	0	0
D6RB26;D6RCF5;F6SDC8;A0A3B3ISS3;Q96CQ1-2;Q96CQ1-3;Q96CQ1;Q9BSK2	Solute carrier family 25 member 36;Solute carrier family 25 member 33	SLC25A36;SLC25A33	19768000	18002000	22109000	19486000	20346000	17661000	19506000	20695000	20991000	17772000	0	0
A0A3B3IST1;B5MD23;O75954	Tetraspanin;Tetraspanin-9	TSPAN9	0	53756000	0	12653000	0	17768000	31087000	29524000	25514000	16979000	0	11912000
A0A3B3ISU0;Q02487-2;Q02487;J3QRL9;Q14574-2;Q14574	Desmocollin-2	DSC2	106920000	74859000	97396000	59217000	56366000	56859000	118760000	87746000	125730000	68306000	70904000	87983000
A0A3B3ISV4			145080000	94562000	152940000	158640000	111660000	95610000	94664000	174930000	118260000	199770000	121400000	158540000
Q8N9N7;A0A3B3ISV5;H3BSW0	Leucine-rich repeat-containing protein 57	LRRC57	191510000	168010000	166540000	240310000	280430000	246300000	140040000	149430000	163940000	199710000	171760000	180900000
A0A3B3IT31;Q9NUN5-3;Q9NUN5;A0A494C126;A0A3B3IRS7;A0A3B3IU68;A0A3F2YP66;A0A3B3ITP2;Q9NUN5-4;Q9NUN5-2	Probable lysosomal cobalamin transporter	LMBRD1	53093000	58617000	42103000	38372000	54290000	49771000	42820000	45209000	56084000	34041000	0	0
A0A3B3IT92;A0A3B3IS57;A0A3B3IRR8;E5RFR3;E5RG53			0	0	0	0	0	0	0	0	0	0	0	36559000
Q5JSC9;A0A3B3IT94;Q96LT4-2;Q96LT4	Sphingomyelin synthase-related protein 1	SAMD8	47307000	39261000	44562000	37969000	45781000	56351000	35164000	40058000	44252000	40615000	0	25658000
P51589;A0A3B3IT99;A0A3B3IU95	Cytochrome P450 2J2	CYP2J2	150220000	94462000	161080000	201240000	0	0	203180000	215950000	163360000	204180000	0	0
H0Y3A3;A0A3B3ITG3;Q5VWQ8-3;Q5VWQ8-4;Q5VWQ8-2;Q5VWQ8-5;Q5VWQ8	Disabled homolog 2-interacting protein	DAB2IP	0	0	0	0	0	0	0	1807300	0	2732600	0	2167600
A0A3B3ITH3;Q9P2X3;Q9P2X3-2;J3QQU0;J3KT25;J3QRS6	Protein IMPACT	IMPACT	34794000	50014000	41566000	96391000	70738000	69676000	30765000	36807000	42191000	48842000	86786000	52204000
A0A3B3ITJ4			172930000	75594000	147540000	84980000	0	0	93488000	75415000	76373000	71456000	72855000	0
A0A3B3ITP4;Q495G5;Q8IVH4;D6RIS5;A0A3B3IRG3	Methylmalonic aciduria type A protein, mitochondrial	MMAA	45561000	28390000	55120000	270010000	355720000	482130000	120230000	143460000	151600000	288920000	456770000	383190000
O95363;A0A3B3ITR6;Q5JRF7	Phenylalanine--tRNA ligase, mitochondrial	FARS2	45277000	45775000	36618000	27526000	0	27540000	49099000	63388000	52935000	27868000	0	55981000
A0A3B3ITT1;Q6IQ22	Ras-related protein Rab-12	RAB12	142900000	115830000	124970000	393590000	471790000	390070000	102620000	113640000	130550000	257040000	358090000	220070000
A0A3B3ITT5;P47914;F8WF43;C9IYI4	60S ribosomal protein L29	RPL29	2558200000	1743700000	1845500000	2050700000	1491400000	1326700000	1767600000	2493500000	2361300000	2018100000	711310000	1487600000
Q14643;Q14643-8;A0A3B3ITU8;A0A3B3IU04;A0A3F2YNW8;Q14643-3;Q14643-4;Q14643-7;Q14643-5;Q14643-6;Q14643-2;A0A3B3ITQ1;A0A3B3IU05;A0A3B3IU13;A0A3B3IRP0;B7ZMI3;A0A3B3IRT5;A0A3B3ITM1;A0A3B3ITM6;A0A3B3ITQ4;A0A3B3IS70;A0A3B3ISR4;A0A3B3IS59;A0A3B3ISE3;A0A3B3IRZ9	Inositol 1,4,5-trisphosphate receptor type 1	ITPR1	187800000	102600000	150970000	607540000	721210000	607460000	28463000	138440000	58819000	301750000	198520000	234640000
A0A3B3ITX2;A0A3B3IS23			0	28139000	0	0	0	0	48961000	25627000	41990000	0	0	0
A0A3B3IU42;H0YEL0;O14893-3;O14893-2;O14893;G5EA29	Gem-associated protein 2	GEMIN2	190550000	240560000	178470000	101510000	68720000	67956000	138210000	137170000	184320000	173890000	5816600	216240000
A0A3B3IUA2;B1AHD1;A0A3B3IRU2;A0A3B3ISK4;A0A3B3ISH1		NHP2L1	4722600000	4441500000	4700600000	4781800000	5104000000	4636200000	4867800000	4683700000	5118500000	4723900000	4760400000	4133200000
Q13144;A0A3B3IUB1;A0A3B3ITG6;A0A3B3ISX3;A0A3B3ITQ2;A0A3B3ISM8;A0A3B3IUF2;A0A3B3ISV1;A0A3B3IS56;A0A3B3IRP4;A0A3B3ISS1;A0A3B3ISI2;A0A3B3IST9;A0A3B3ITK8;C9JRD9;A0A3B3IT53;H7C2X0	Translation initiation factor eIF-2B subunit epsilon	EIF2B5	763280000	742690000	748720000	522280000	609470000	615950000	635050000	723070000	763950000	604720000	516930000	581020000
A0A3B3IUB5;Q8TCT9-5;Q8TCT9;A0A0S2Z6F0;A0A075B6F6;A0A3B3IT72;A0A087WVH6;A0A0C4DGU3	Minor histocompatibility antigen H13	HM13	2610700000	1389700000	2957900000	1995100000	1999400000	1992800000	1179300000	2371500000	1301700000	1842200000	2060800000	1857000000
A0A3B3IUD2;Q9BUK6-7;Q9BUK6-3;Q9BUK6-2;Q9BUK6;Q9BUK6-4;Q9BUK6-5	Protein misato homolog 1	MSTO1	105430000	119400000	107600000	60246000	57886000	69803000	136220000	119730000	135550000	63013000	74598000	76249000
Q14690;A0A3B3IUD7;S4R3Q4	Protein RRP5 homolog	PDCD11	3872500000	2421200000	4001900000	3677000000	3711800000	3617100000	1984100000	3958800000	2589800000	5419600000	4411900000	5209400000
A0A3F2YNW7;Q8NFD5;Q8NFD5-2;Q8NFD5-3;A0A1B0GWJ2;A0A1B0GTJ8;A0A1B0GVK1;H0Y7H8;Q8NFD5-4;A0A1B0GV63;H0Y3S9;A0A1B0GTI6;H0Y2R3;A0A1B0GUC6;A0A1B0GUG2;A0A1B0GU09	AT-rich interactive domain-containing protein 1B	ARID1B	94971000	133460000	74248000	151900000	86582000	79774000	121830000	97100000	119870000	122050000	187280000	90538000
A0A3F2YNY7;P08397;A0A3B3IRR1;P08397-2;F5H345;P08397-3;P08397-4;F5H0P4;A0A3B3IU56;F5GY90;A0A1W2PNU5;A0A3B3IU34;F5H226;A0A0G2JQQ7;F5H4X2;F5H4W5	Porphobilinogen deaminase	HMBS	642520000	597630000	554480000	442050000	412000000	359130000	661490000	599240000	771550000	798350000	573490000	608780000
A0A494BZT8;Q9Y6A5;E7EMT0;C9JA91;C9JWI7;A0A494C117;Q8IX09;H0Y8F2;F8WC55	Transforming acidic coiled-coil-containing protein 3	TACC3	303910000	314210000	324240000	150310000	247780000	283460000	367970000	391850000	366050000	432520000	388800000	364970000
A0A494BZV2;Q6WCQ1-3;Q6WCQ1;Q6WCQ1-2;J3KSW8;H0Y2S9;H0Y7E2;H7C3G6;A0A1W2PPU9;K7EL39;J3KSK7;J3QRL2	Myosin phosphatase Rho-interacting protein	MPRIP	177680000	221440000	186300000	133410000	154040000	124680000	167190000	179870000	175030000	120270000	80012000	141680000
A0A494BZY7;H3BQF6;Q5JPI9;M0QZ67;G3V238	Protein-lysine N-methyltransferase METTL10	METTL10	33180000	28094000	42324000	30572000	36608000	31396000	42998000	43630000	49308000	28446000	0	32317000
A0A494BZZ6;P78549-3;P78549-2;P78549;H3BRL9;A0A494C106;H3BPD5	Endonuclease III-like protein 1	NTHL1	36919000	25949000	34120000	12935000	15724000	0	30433000	35120000	27876000	0	0	30842000
A0A494BZZ8;Q96K49-2;Q96K49;H7C1G1;H7C0B3;A0A3B3IU29	Transmembrane protein 87B	TMEM87B	64787000	66568000	62720000	249950000	238310000	267540000	62602000	88821000	51540000	172720000	186030000	145400000
A0A494C017;C9JJV6;C9JZL8;A0A499FIY8;C9J5M0;C9JC07;Q96S97	Myeloid-associated differentiation marker	MYADM	100560000	81667000	90389000	91521000	106790000	129330000	65071000	96087000	78816000	74355000	102550000	90208000
A0A494C039;E9PJ21;A0A087WWI4;K7EQK2;Q9Y4L1-2;J3KTF1;J3QL06;Q9BST8;J3QQH7;J3QLE9;A0A087X214;A0A087WW13	Hypoxia up-regulated protein 1	HYOU1	0	0	17463000	0	0	0	18804000	19055000	15830000	0	0	14631000
A0A494C045;Q9UHD2;A0A494C0X2;A0A494C167;A0A494C148;A0A494C0A8;A0A494C1M6;A0A494C0R4;A0A494C079;A0A494C1I2;F5H206;F5H1A3;F5GZI4	Serine/threonine-protein kinase TBK1	TBK1	478420000	495930000	463870000	631950000	676530000	718660000	453910000	442790000	421380000	548930000	655500000	549960000
A0A494C050;Q8N5F7;Q5M9Q1	NF-kappa-B-activating protein	NKAP	296390000	355200000	386240000	639980000	690200000	717950000	357120000	396960000	351080000	530580000	654330000	662120000
A0A494C066;B7Z4W5;Q16773-2;Q16773;Q5T278;Q16773-3;Q5T277;Q5T276	Kynurenine--oxoglutarate transaminase 1	CCBL1	20426000	16782000	17322000	10424000	0	9935400	0	0	0	10452000	0	0
A0A494C1G8;A0A494C0Z6;H0Y6K5;A0A494C070;H0Y7L6;Q02447-4;Q02447-3;Q02447-5;Q02447-6;Q02447-2;Q02447	Transcription factor Sp3	SP3	161630000	93946000	137940000	222750000	155880000	165810000	79802000	108780000	126590000	113270000	77521000	104570000
A0A494C071			8869500	0	0	0	0	0	0	0	0	0	4860800	0
A0A494C0R8;I3L2B0;K7EIG1;I3L4B5		CLUH	2172900000	2385000000	2213200000	1549400000	1608300000	1641400000	2718200000	2651800000	2779500000	1950600000	1805800000	1901100000
O95453;O95453-2;A0A494C0W0;A0A494C1K5;O95453-3;A0A494C0K5;A0A494C1N1;A0A494C0Q2;A0A494C0P9;A0A494BZW7;A0A494C0Q6;A0A494BZU6;A0A494C1G3;A0A494C156;A0A494C002;H3BRK1;O95453-4;F5H1Z4	Poly(A)-specific ribonuclease PARN	PARN	646380000	631680000	632860000	706030000	793320000	686590000	767740000	781810000	816220000	831300000	486380000	781440000
J3KR33;A0A494C0Y4;A0JLT2;A0A2R8YDL4;A0A494C0G4;A0JLT2-2	Mediator of RNA polymerase II transcription subunit 19	MED19	0	20408000	21566000	27421000	20832000	27705000	0	0	27003000	28286000	0	0
A0A494C0Z5;Q9H082;Q14088	Ras-related protein Rab-33B	RAB33B	75017000	87126000	95439000	128380000	192730000	151130000	102250000	128920000	104430000	146040000	132430000	185230000
A0A494C108;Q8N9T8;H0YFD2;F8WFC1;H0YG91;H0YH26	Protein KRI1 homolog	KRI1	235590000	210730000	209030000	302830000	306380000	255020000	222330000	249840000	230350000	176350000	128220000	155710000
A0A494C143;Q14689-6;Q14689;Q14689-5;Q14689-3;Q14689-2;Q14689-4	Disco-interacting protein 2 homolog A	DIP2A	41487000	26367000	35452000	23703000	0	21985000	24650000	31156000	30896000	0	47281000	0
P50336;A0A494C146;A0A494C0D4;H0YFP3;F5GZT7;A0A1W2PRF9;A0A1W2PPA5;D3DVG2;A0A494C0M9;H0YFE1;A0A1W2PQM0;A0A1W2PNH4;F5H825;A0A494C134;F5H1I5;A0A494C0L4;A0A494C1M8	Protoporphyrinogen oxidase	PPOX	195600000	203350000	231680000	299470000	273080000	260460000	263620000	218390000	236720000	226000000	251170000	255110000
A0A494C164;P52630;A0A494C1L3;B4DHE0	Signal transducer and activator of transcription 2	STAT2	739580000	928680000	745630000	2437700000	2419100000	1983300000	721830000	707260000	747620000	2478500000	2503900000	2252800000
A0A494C165;P12955;K7ES25;P12955-3;P12955-2;A0A494C194;V9GYL0;V9GYE4	Xaa-Pro dipeptidase	PEPD	3081300000	3433800000	2967400000	1831200000	2238000000	2198600000	3485800000	4422700000	4484800000	1662800000	1988400000	1930300000
A0A494C169;Q9NVE7;E9PHT6;H0YA26;H0Y9E4;H0YA31;H0YA02;D6RJF3	Pantothenate kinase 4	PANK4	441500000	453850000	462890000	506800000	529930000	519760000	458570000	391620000	410440000	466840000	476060000	470000000
A0A494C1F2;P35658-2;P35658-4;P35658;P35658-3;P35658-5;A0A0A0MSW3;A0A494BZU9;H0YF36;H0Y837;B7ZAV2;A0A494C104;H0YDS4;A0A494C0J0;A0A494C0Y1;E9PKD2	Nuclear pore complex protein Nup214	NUP214	2844700000	2849900000	2619900000	2999000000	3279200000	3351300000	2764200000	2759000000	2831800000	3294500000	3074100000	3207800000
F8WAN1;A0A494C1J1;Q69YQ0-2;Q69YQ0;C9J8U1;C9JLY8	Cytospin-A	SPECC1L-ADORA2A;SPECC1L	133520000	121810000	120110000	165880000	137450000	130840000	87639000	136880000	91016000	181520000	193560000	172410000
A0A494C1L5;P50851-2;P50851;E9PEM5;A0A494BZW2;A0A494C0R9;H0YAC6;A0A3B3IS13;H0Y9N9;A0A3B3ISK3;H0YA17;A0A3B3IU76	Lipopolysaccharide-responsive and beige-like anchor protein	LRBA	3867700000	4131100000	3698400000	2829700000	2836000000	3109000000	4091100000	3737200000	4311200000	2951000000	2973100000	2724200000
A0A494C1M4;Q3SY69;Q3SY69-3;Q3SY69-2;H0YHN9	Mitochondrial 10-formyltetrahydrofolate dehydrogenase	ALDH1L2	388700000	446440000	351400000	1262400000	1359300000	1163000000	396590000	378000000	369990000	1376200000	1475300000	1290900000
A0A494C1N0;P26885	Peptidyl-prolyl cis-trans isomerase FKBP2	FKBP2	1200400000	1489100000	1329000000	917190000	796240000	699710000	1532500000	1388600000	1541700000	909030000	817690000	945530000
J3KPS2;A0A494C1T9;Q6ZRV2	Protein FAM83H	FAM83H	51356000	34390000	46102000	48880000	72830000	51700000	30434000	37371000	33599000	53316000	55138000	60257000
A0A494C1V1;Q6ZNJ1-2;Q6ZNJ1-3;Q6ZNJ1;H0Y764;H7C3Y7;H7C408	Neurobeachin-like protein 2	NBEAL2	41260000	50961000	42863000	40526000	90519000	73902000	66443000	66484000	51529000	54786000	78077000	78310000
A0A499FI31;Q15020;Q15020-4;F8VV04;Q15020-2;F8W667;A0A494C0L2;H0YHU8;F8VVK9;F8VZM2;Q15020-3	Squamous cell carcinoma antigen recognized by T-cells 3	SART3	5570400000	5696000000	5680400000	5624800000	6010400000	5769100000	5537500000	5558200000	5722500000	6272600000	6920300000	5890000000
A0A499FI48;C9JMN9			96109000	131520000	79692000	93716000	105530000	88580000	102480000	75226000	93925000	72773000	61991000	95245000
A0A499FIZ0;Q9H7D7;H0Y9R3;C9JCS7;Q9H7D7-4;H0Y917;Q9H7D7-3	WD repeat-containing protein 26	WDR26	656870000	695160000	649610000	1064200000	1062200000	1084500000	739280000	656310000	731550000	905230000	944240000	993130000
A0A499FJ32;H3BUX2;D6RFH4		CYB5B	1265400	644580	690550	0	0	0	555800	899340	0	1267700	0	964500
A0A499FJI4;O75592-2;O75592;H7C3U4	E3 ubiquitin-protein ligase MYCBP2	MYCBP2	82416000	40794000	89448000	102260000	58499000	47439000	58213000	73314000	79929000	28643000	0	56745000
P01137;A0A499FJK2;M0R2S0	Transforming growth factor beta-1;Latency-associated peptide	TGFB1	20788000	21269000	21160000	52204000	36493000	35974000	19529000	17806000	22611000	46741000	28578000	29534000
D6R9D6;A0AV96-2;A0AV96;B7Z8Z7;D6RBS9;D6REZ6;D6R9M7;D6RA49;D6RFL5;D6RBP6;D6RCT1;Q8TBY0-2;Q8TBY0-3;Q8TBY0;D6RF41	RNA-binding protein 47	RBM47	942220000	1056400000	982910000	1323000000	1482000000	1345800000	941050000	807300000	920810000	1143000000	1634900000	1113500000
A0AVT1;A0AVT1-2;H0Y8S8;A0AVT1-3;A0AVT1-4;H0Y9U5	Ubiquitin-like modifier-activating enzyme 6	UBA6	3487500000	3776300000	3577800000	5890800000	5790600000	5776700000	3437900000	3357500000	3493200000	5609100000	6416400000	5888000000
A0JNW5;A0A0C4DGH6;A0JNW5-2;F8W665;H0YHT7;F8W1I2;F8VW65;F8VWX2	UHRF1-binding protein 1-like	UHRF1BP1L	716490000	688740000	609300000	157010000	188270000	108780000	544310000	648260000	613170000	130210000	26561000	124030000
A0MZ66;A0MZ66-6;A0MZ66-5;A0MZ66-3;A0MZ66-4;A0MZ66-8;A0MZ66-2;A0MZ66-7	Shootin-1	KIAA1598	3776600000	3870200000	3783800000	3602900000	3479900000	3202300000	4067000000	4208700000	4507400000	3164400000	3075800000	3049500000
A0PJW6;G5EA27;H0YCK4	Transmembrane protein 223	TMEM223	74172000	64902000	89601000	86871000	90539000	82324000	87328000	90233000	102370000	82791000	144930000	93830000
A1L0T0;M0R026;E9PJS0;E9PL44;M0QZX5;M0R1B5;E9PNL1	Acetolactate synthase-like protein	ILVBL	1325100000	1032800000	1564800000	1157900000	1127300000	1264400000	1092300000	1507200000	1218100000	1440200000	1683600000	1355700000
H7C2G1;F8W6W0;A1L170;A1L170-2	Uncharacterized protein C1orf226	C1orf226	0	0	14642000	29740000	18794000	0	0	14734000	13742000	0	0	38469000
A1L188	Uncharacterized protein C17orf89	C17orf89	20026000	0	19198000	0	0	26247000	19638000	21365000	0	14585000	0	10286000
A1L390;G3V311;A1L390-2;A1L390-3;G3V3I3;G3V278	Pleckstrin homology domain-containing family G member 3	PLEKHG3	0	15848000	0	0	0	0	36093000	0	20371000	0	0	0
D6RE10;D6RBR5;D6RBM2;A1L3X0	Elongation of very long chain fatty acids protein;Elongation of very long chain fatty acids protein 7	ELOVL7	42635000	23912000	52021000	0	79483000	67361000	26321000	48487000	43390000	30143000	0	49034000
A1X283;G3V144;A0A1B0GUF2	SH3 and PX domain-containing protein 2B	SH3PXD2B	144650000	112200000	231010000	102470000	103240000	109080000	85699000	141900000	97452000	91588000	18812000	98556000
A2A274;Q99798	Aconitate hydratase, mitochondrial	ACO2	13035000000	13597000000	12763000000	16484000000	17871000000	16796000000	13828000000	13367000000	13623000000	14506000000	14153000000	15502000000
A2A283;F8WCE4;B5MCD7;O43759-2;O43759	Synaptogyrin-1	SYNGR1	21017000	22559000	19677000	0	20159000	24150000	20244000	13152000	22588000	0	0	0
A2A2G4;Q9Y672;A0A3B3IS62;A0A3B3ITD6;A0A3B3ITI5;S4R350	Dolichyl pyrophosphate Man9GlcNAc2 alpha-1,3-glucosyltransferase	ALG6	64943000	24586000	37158000	0	0	0	0	0	0	0	0	0
Q5JX74;A2A2L4;Q9NUS5	AP-5 complex subunit sigma-1	AP5S1	15496000	14256000	17012000	0	15514000	25343000	23092000	20901000	25882000	15212000	33659000	30898000
A2A2Q9;Q9Y312	Protein AAR2 homolog	AAR2	131400000	158140000	141170000	130000000	108980000	124880000	150720000	139550000	132750000	135590000	208040000	139120000
A2A2V2;P42696;P42696-2;Q5TCT4;H7C5M1	RNA-binding protein 34	RBM34	408990000	312260000	479490000	433400000	478570000	449490000	301290000	447560000	368270000	467820000	298230000	492610000
Q9HCF6-11;A2A3F7;H7BYP1;G5E9G1;A2A3F3;A2A3F4;E9PBI7;Q9HCF6;Q9HCF6-7;Q9HCF6-6;Q9HCF6-3;Q9HCF6-4;Q9HCF6-5;Q9HCF6-2;Q9HCF6-8;Q9HCF6-10;Q504Y1	Transient receptor potential cation channel subfamily M member 3	TRPM3	81220000	98635000	42950000	86775000	109400000	40113000	165100000	96932000	91822000	140130000	40777000	26477000
A2A3Z5;Q8IV20	Laccase domain-containing protein 1	LACC1	9516200	8472100	4728100	10415000	14350000	13807000	0	6783600	0	24983000	14354000	21875000
A2AEA2;P10321;O19617;A0A140T921;A0A140T9H5;A0A140T9U8;A0A1W2PRU9	HLA class I histocompatibility antigen, Cw-7 alpha chain	HLA-C	0	654230	0	1447400000	863560000	796060000	338040	587700	928530	260780000	197650000	233180000
A2IDA3;P29372-5;P29372-4;P29372-2;P29372	DNA-3-methyladenine glycosylase	MPG	22596000	25203000	24175000	34062000	26834000	28778000	27031000	28078000	15367000	0	17686000	15826000
A2IDC6;Q13084;Q4TT37;A2IDC7	39S ribosomal protein L28, mitochondrial	MRPL28	251370000	278580000	222740000	167050000	120840000	144940000	256500000	240570000	281920000	136090000	161690000	136420000
A2RRP1;A2RRP1-2;H0Y5G7;H7C007;H7BZU5;H7BZR3;C9JCM7;H7C1U4	Neuroblastoma-amplified sequence	NBAS	787650000	824070000	860070000	917660000	929190000	934020000	895650000	839570000	900920000	873280000	746860000	750870000
A2RTX5;A2RTX5-2;B7ZLP8	Probable threonine--tRNA ligase 2, cytoplasmic	TARSL2	0	0	0	0	12886000	0	285870000	0	85268000	88562000	0	0
A2RUC4;A2RUC4-2	tRNA wybutosine-synthesizing protein 5	TYW5	33693000	41570000	61480000	54964000	48554000	0	62890000	50806000	0	61121000	0	0
Q5QPD4;A3KFJ0;O14965	Aurora kinase A	AURKA	40268000	34256000	28929000	0	0	11840000	30456000	44195000	33324000	0	0	30927000
A3KFL5;A3KFL2;Q13868-3;Q13868-2;Q13868;A3KFL1	Exosome complex component RRP4	EXOSC2	284960000	352200000	334210000	271940000	274300000	198140000	298040000	260950000	278170000	283780000	0	303590000
A3KMH1;A3KMH1-3;A3KMH1-2	von Willebrand factor A domain-containing protein 8	VWA8	700210000	699990000	710730000	683430000	801460000	674170000	711980000	790580000	774350000	659510000	591910000	796790000
A3KN83-3;A3KN83-2;A3KN83;A3KN83-4;K7ES28;Q9Y2G9-3;Q9Y2G9	Protein strawberry notch homolog 1	SBNO1	411700000	289580000	423280000	106210000	123890000	159030000	321190000	387420000	273710000	174840000	60280000	105600000
B8ZZQ8;A4D161-3;A4D161-2;A4D161	Protein FAM221A	FAM221A	0	0	0	40651000	45776000	65484000	0	19336000	0	25962000	0	0
A4D1E9;A4D1E9-2;C9J8R7;C9JNI1;C9JEQ8;F8WBY0;F8WCN4;F8WBB5;A4D1E9-3	GTP-binding protein 10	GTPBP10	154390000	147190000	140000000	87844000	79639000	100260000	169410000	171470000	170420000	125520000	92492000	83358000
C9J1X0;A4D1P6;A4D1P6-2;A4D1P6-3	WD repeat-containing protein 91	WDR91	137100000	135500000	151680000	114430000	120960000	155050000	139850000	136190000	124720000	79151000	67723000	92818000
F5H4Q5;A5D8V6	Vacuolar protein sorting-associated protein 37C	VPS37C	69443000	83763000	59413000	46494000	31166000	37128000	61810000	66945000	59611000	51124000	33006000	44482000
A5PLN9-2;A5PLN9-4;A5PLN9;A5PLN9-5;A5PLN9-7;D6RB83	Trafficking protein particle complex subunit 13	TRAPPC13	210890000	200810000	207540000	160540000	169460000	173010000	181700000	155360000	113390000	247860000	237980000	189650000
A5YKK6;A5YKK6-4;H3BNB1;H3BTH2;H3BMH0;H3BT18;H3BU44;H3BVC9;H3BR89;H3BPF1	CCR4-NOT transcription complex subunit 1	CNOT1	4548800000	4743000000	4581500000	3799700000	4060700000	4092000000	4649400000	4572600000	4779500000	4271100000	4112200000	4188500000
A5YKK6-2;A5YKK6-3	CCR4-NOT transcription complex subunit 1	CNOT1	13424000	18436000	18976000	14906000	0	17983000	25135000	0	16792000	18755000	27039000	0
A6NCC9;E9PME3;C9JHT9;C9JJV1;Q9Y5U2-2;Q9Y5U2;E9PL88;C9JDU0	Protein TSSC4	TSSC4	174320000	204860000	183420000	182880000	195860000	192070000	198500000	190890000	193340000	192920000	129520000	116070000
H3BTL1;Q9GZQ8;A6NCE7;Q9H492;Q9H492-2	Microtubule-associated proteins 1A/1B light chain 3B;Microtubule-associated proteins 1A/1B light chain 3 beta 2;Microtubule-associated proteins 1A/1B light chain 3A	MAP1LC3B;MAP1LC3B2;MAP1LC3A	56063000	74690000	62916000	139280000	120550000	172450000	78529000	78265000	65832000	88112000	99192000	0
A6NCS6	Uncharacterized protein C2orf72	C2orf72	191780000	189920000	227820000	6032100	0	20864000	287790000	279930000	154450000	61932000	47876000	67723000
A6ND36;A6ND36-2;K7EKG0	Protein FAM83G	FAM83G	43112000	50732000	37864000	162060000	236470000	113170000	60796000	70576000	62115000	80262000	102780000	96966000
A6NDA1;Q99871-3;Q99871;Q99871-2	HAUS augmin-like complex subunit 7	HAUS7	51626000	46464000	35542000	31969000	0	0	0	0	0	21419000	44515000	0
A6NDG6;H3BV17	Phosphoglycolate phosphatase	PGP	1926200000	2110100000	1859900000	710590000	768320000	721120000	2144700000	2075700000	2014300000	1341300000	1456300000	1363400000
A6NDU8;A0A0C4DGW6	UPF0600 protein C5orf51	C5orf51	532450000	680400000	663610000	660510000	862450000	670150000	634680000	556140000	638960000	709880000	746340000	656480000
G3V2I3;A6NED2	RCC1 domain-containing protein 1	RCCD1	0	27421000	32257000	0	0	0	24721000	28180000	0	0	28867000	0
A6NF31;O75665;O75665-3;A0A0A0MS89;O75665-2	Oral-facial-digital syndrome 1 protein	OFD1	20919000	13459000	353490000	20723000	18521000	32385000	22101000	21813000	29355000	23649000	0	23862000
A6NFI3	Zinc finger protein 316	ZNF316	15668000	15523000	22684000	44618000	29674000	39175000	9697400	16025000	19353000	23638000	18753000	24726000
D6RCT8;A6NFV8;Q96EV8-2;Q96EV8;D6RID1;A0A087WYP9;Q96EV8-3;D6RJC6	Dysbindin	DTNBP1	13785000	13095000	9845600	16720000	13423000	10854000	13482000	13867000	21353000	18689000	11117000	15965000
A6NFX8;Q9UKK9;A6NJU6;A6NCQ0;H0YEY4;C9JYY9	ADP-sugar pyrophosphatase	NUDT5	1573800000	1718100000	1578400000	1692900000	1851200000	1765000000	1729400000	1723000000	1824700000	2376500000	2878100000	2283500000
K7EIJ0;K7ENL2;A6NG10;K7EMC9;Q969T9;K7EIN1;K7ESN4;Q969T9-2;K7EIK1	WW domain-binding protein 2	WBP2	503260000	542380000	482440000	511010000	519170000	453350000	504010000	442690000	499010000	394470000	281050000	316810000
A6NGA6;Q9Y5S8-3;Q9Y5S8;H0Y581;Q5H9D4;Q9Y5S8-2	NADPH oxidase 1	NOX1	91241000	22079000	45791000	50271000	41275000	51352000	59018000	73540000	62663000	136200000	140180000	124230000
A6NGC4	TLC domain-containing protein 2	TLCD2	0	0	0	24803000	23575000	26275000	0	0	0	0	42966000	24439000
E9PIZ0;C9JST7;A6NGW1;O95070	Protein YIF1A	YIF1A	18877000	20335000	17653000	17922000	11536000	15097000	11716000	18449000	13537000	24291000	14629000	27854000
A6NH11	Glycolipid transfer protein domain-containing protein 2	GLTPD2	203590000	129820000	218830000	206690000	199050000	175630000	108100000	158230000	124270000	181890000	172970000	170360000
A6NHN7;A6NHB5;Q14202-2;Q14202;A6NL54;Q14202-3;A6NC58	Zinc finger MYM-type protein 3	ZMYM3	538410000	451890000	513340000	292370000	284090000	399190000	532410000	505550000	485620000	460330000	354630000	388670000
A6NHL2-2;A6NHL2	Tubulin alpha chain-like 3	TUBAL3	22207000	26216000	27122000	17521000	20615000	25620000	29059000	28134000	25112000	25229000	25344000	36072000
A6NHQ2	rRNA/tRNA 2-O-methyltransferase fibrillarin-like protein 1	FBLL1	791470000	605330000	706990000	661650000	617290000	692300000	678270000	715620000	720320000	963630000	869980000	977280000
A6NHR9;A6NHR9-2;J3KTL8;A6NHR9-3;A0A2R8YCU7;A0A2R8YE92;J3QSH1;J3KTK7;J3KRK8	Structural maintenance of chromosomes flexible hinge domain-containing protein 1	SMCHD1	5089800000	4945400000	4879200000	7347700000	7147600000	6776900000	4683500000	4864100000	4869600000	5824900000	5881800000	5745600000
A6NHX0;F2Z3I9;F2Z2C1;F8WD52;B7WPJ3;Q8WTX7	GATS-like protein 2;GATS-like protein 3	GATSL2;GATSL3	82522000	104230000	88766000	25636000	34106000	29807000	111450000	102940000	122010000	44509000	62695000	51326000
A6NIH7	Protein unc-119 homolog B	UNC119B	180010000	231780000	247900000	221220000	250990000	246200000	243620000	243630000	214380000	269870000	280310000	239860000
A6NJ78;A0A0U1RR76;A6NJ78-2;A6NJ78-4;A0A0U1RRF2;B5MC64;A0A0U1RR64;A0A0U1RRD2;F8WD83;A6NJ78-3;P0C7V9	Probable methyltransferase-like protein 15	METTL15	72595000	79737000	55452000	96562000	96045000	70772000	74493000	71184000	76973000	61924000	62218000	74301000
A6NKD9;H0YJE0;G3V5D5;G3V2D7;G3V4C8;H0YJY5	Coiled-coil domain-containing protein 85C	CCDC85C	47058000	36841000	44873000	105930000	0	110340000	27183000	25251000	31429000	27238000	15455000	36005000
J3KNE0;A6NKT7	RanBP2-like and GRIP domain-containing protein 3	RGPD3	168820000	126630000	121440000	123670000	139370000	114470000	135640000	98506000	116930000	128140000	80766000	133980000
A6NLH6;Q9P003	Protein cornichon homolog 4	CNIH4	148490000	608090000	200740000	230730000	305030000	232950000	164620000	212960000	215920000	67833000	38374000	81012000
A6NMA8;O95825;H7C3S0;C9K0F7;F8WF64;H7C3I5;A6NND8;A6NHJ8;O95825-2;H7C338;C9JQD0;C9JAL0;C9JZK8	Quinone oxidoreductase-like protein 1	CRYZL1	28535000	43443000	0	65003000	49971000	59405000	42794000	46876000	37787000	51586000	72393000	55301000
E9PJK1;E9PRJ8;H0YDL9;H0YDJ9;E9PIF1;A6NMH8;P60033;E9PM31;H0YEE2	Tetraspanin;CD81 antigen	CD81	162920000	143900000	244650000	207280000	226920000	234290000	134360000	223830000	226550000	190890000	198850000	171520000
A6NMQ3;Q5T5H1;O43768-2;O43768;O43768-9;O43768-3;O43768-4;A0A1W2PRU0;O43768-6;O43768-5;O43768-7;O43768-8	Alpha-endosulfine	ENSA	659420000	774020000	668600000	825980000	871470000	736460000	578640000	574290000	592470000	485410000	478830000	462520000
A6NN40;Q2M3G4-2;Q2M3G4;C9JXU1	Protein Shroom1	SHROOM1	24350000	27252000	18538000	0	21197000	28586000	36771000	26095000	25437000	40319000	0	38221000
A6NN50;O75147-2;O75147-1;O75147-4;O75147;A8MSZ8	Obscurin-like protein 1	OBSL1	48586000	41886000	48128000	0	0	0	43010000	34845000	55389000	42507000	0	0
A6PW57;Q99755-3;Q99755;Q99755-4;Q99755-2;O60331-4;O60331;O60331-2;O60331-3;A6PW58;A2A5X0;O14986-3;O14986;O14986-2	Phosphatidylinositol 4-phosphate 5-kinase type-1 alpha	PIP5K1A	0	20644000	66363000	187360000	289200000	368150000	42054000	66681000	48200000	141140000	114720000	135860000
A6ZKI3;Q17RB0	Protein FAM127A;Protein FAM127C	FAM127A;FAM127C	647650000	229850000	241900000	177380000	171700000	0	274480000	205630000	385510000	166230000	78978000	73901000
C9J1B5;A8MQT2;A7E2F4-3;A7E2F4;A8MQT2-2;A0A087WXI9;Q9NYA3;P0CG33;A6NDN3;A6NDK9	Golgin subfamily A member 8B;Golgin subfamily A member 8A	GOLGA8B;GOLGA8A	232270000	230180000	176720000	20593000	21507000	57200000	93460000	86883000	93102000	11076000	0	13299000
S4R3H3;S4R393;S4R410;A7E2V4-5;A7E2V4;A7E2V4-3;A7E2V4-4;S4R3B3;H7C453;A7E2V4-2;S4R3U7;H7BZ52;H0YCW2	Zinc finger SWIM domain-containing protein 8	ZSWIM8	13590000	16384000	22935000	15334000	13457000	16241000	25606000	18782000	31143000	17667000	12103000	13676000
CON__Q3SX28;A7XZE4		TPM2b	416820000	439950000	358610000	694460000	611070000	548410000	343360000	343930000	462410000	425840000	380380000	360650000
A8CG34;A8CG34-2;C9JFL1;C9JER0;C9J370;A0A0J9YWR1;Q6PJE2-5;Q6PJE2;A6NF01	Nuclear envelope pore membrane protein POM 121C	POM121C	44010000	42696000	66564000	60757000	57816000	69748000	34047000	55324000	50712000	46701000	0	40476000
A8K7Q2;E9PS65;E9PM13		HSPA8	57842000	61167000	42566000	101930000	117710000	110020000	110200000	56326000	44473000	225990000	255550000	201140000
P55145;A8K878;H7C2D6	Mesencephalic astrocyte-derived neurotrophic factor	MANF	1194600000	1189200000	1476400000	903450000	854210000	902850000	1388300000	1628500000	1547500000	1209100000	847030000	834430000
A8MQ02;H0Y8L4;H0Y9I0;F8W9I4;E9PFY5;H0YA98		MLLT4	1899600000	1918000000	2102000000	1880200000	1899000000	1803600000	1863500000	2009800000	2056400000	1843000000	1854500000	1854100000
A8MSP2;A8MTC6;A8MZI4;B7Z3L0;Q96AX2-4;Q96AX2-2;Q96AX2;Q96AX2-3	Ras-related protein Rab-37	RAB37	0	0	4169300	0	0	0	0	4374800	0	5517200	13391000	0
A8MTY9;O14972-2;O14972;A8MY26	Down syndrome critical region protein 3	DSCR3	25819000	23173000	20357000	24802000	26152000	30574000	27067000	23161000	27941000	29435000	25245000	21737000
A8MUA9;A8MU27;P55854;P55854-2	Small ubiquitin-related modifier 3	SUMO3	28894000	21457000	16145000	8890200	5730700	6113200	19276000	20511000	22110000	16382000	8857500	11627000
A8MUM1;Q53HC9;C9J0U9;D3YTH5;F8WDS8;C9JVR6;F8WDX0;F8WB12	Protein TSSC1	TSSC1	517440000	476180000	445720000	683310000	830570000	898480000	469390000	457560000	537200000	428950000	503500000	410060000
H7BY10;K7EJV9;K7ERT8;A8MUS3;P62750;K7EMA7	60S ribosomal protein L23a	RPL23A	9399700000	7419300000	9570200000	6299500000	6366000000	4274600000	6634800000	8089700000	8406700000	7442500000	5410600000	4969000000
P62308;A8MWD9;Q49AN9;F5H013;C9JVQ0	Small nuclear ribonucleoprotein G;Putative small nuclear ribonucleoprotein G-like protein 15	SNRPG;SNRPGP15	1167800000	1267500000	1021700000	857870000	789110000	800170000	1324100000	1017900000	960000000	1027600000	1181400000	1283700000
A8MXB7;Q9Y343-2;Q9Y343;H0YA25;Q96L94-2;Q96L94	Sorting nexin-24	SNX24	13912000	20337000	12040000	36598000	24295000	26824000	28006000	25487000	33259000	26603000	39016000	20748000
A8MZH8;A8MXQ1;P53801	Pituitary tumor-transforming gene 1 protein-interacting protein	PTTG1IP	84550000	60168000	74426000	73486000	95898000	88895000	88162000	106210000	91675000	56095000	82677000	72390000
A8MXV4	Nucleoside diphosphate-linked moiety X motif 19, mitochondrial	NUDT19	51352000	62857000	76139000	120610000	110290000	141560000	95031000	90786000	88301000	142880000	137800000	121080000
B5MC17;A8MYP8	Outer dense fiber protein 3B	ODF3B	0	0	0	0	30519000	31807000	0	0	0	58930000	54347000	64847000
A9Z1X7;Q8IYB3-2;Q8IYB3;E9PCT1;M0R088;M0R1E7;M0QXG5	Serine/arginine repetitive matrix protein 1	SRRM1	1000400000	1179000000	1010200000	845450000	873880000	736620000	1095800000	1185600000	1185200000	1071900000	793030000	851050000
B0QYK0;Q01844-6;Q01844-3;Q01844;Q01844-5;A0A0D9SFL3;C9JGE3;Q01844-2;Q01844-4	RNA-binding protein EWS	EWSR1	3874400000	3958900000	4156800000	4910800000	5302100000	4962200000	2926500000	3870000000	4122900000	3821300000	4117900000	3964300000
U3KQS8;F8WC47;U3KPY1;U3KQB0;B0QYL8;B0QYL9;P61218	DNA-directed RNA polymerases I, II, and III subunit RPABC2	POLR2F	29060000	30107000	24952000	9631500	5530200	0	25545000	21054000	34447000	18692000	0	14622000
H3BQQ9;B0QYN7;P63279;H3BPC4;H3BRD1	SUMO-conjugating enzyme UBC9	UBE2I	2696400000	2791300000	2869900000	2528400000	2700900000	2800400000	2470600000	2475500000	2793700000	2735900000	3026400000	3169800000
B0QZE2;B7Z2J6;Q15326-4;Q15326-2;Q15326-6;Q15326-3;Q15326;A0A0A0MRY2;E7ENI9;J3QKD2;Q15326-5;E9PE09;E7EV75	Zinc finger MYND domain-containing protein 11	ZMYND11	56066000	35941000	50459000	42550000	91099000	40338000	35368000	43488000	37297000	57220000	0	74873000
B0YIW2;P02656	Apolipoprotein C-III	APOC3	346020000	319550000	337990000	898530000	1027000000	465240000	307610000	254830000	273820000	505700000	738680000	330010000
B1AJQ6;Q86Y82	Syntaxin-12	STX12	884220000	746310000	839200000	1296800000	1238300000	1263300000	823970000	846310000	757880000	941620000	936120000	801200000
B1AKI6;Q9NUK0;B1AKI5;B1AKI4;Q9NUK0-5;Q9NUK0-4;Q9NUK0-3;Q9NUK0-2;B1AKI2	Muscleblind-like protein 3	MBNL3	116610000	131360000	128880000	76497000	63422000	93023000	190520000	133900000	140130000	90064000	55436000	69034000
B1AKJ5;O43847;O43847-2;G3V1R5;F5H7V1;H0Y5G9	Nardilysin	NRD1	1774100000	1975100000	1801100000	982840000	923780000	1063700000	1879400000	1797500000	1853700000	1081700000	1172300000	995000000
B1AKN3;Q9P2R6;Q9P2R6-2;A0A075B770;H7BYW9	Arginine-glutamic acid dipeptide repeats protein	RERE	27710000	35524000	28266000	0	25427000	0	25174000	0	0	0	0	40360000
B1AKY9;P50993;H0Y7C1;Q13733;P20648;E9PRA5;M0QXF2	Sodium/potassium-transporting ATPase subunit alpha-2	ATP1A2	127020000	97585000	175350000	201560000	223680000	207360000	144130000	177260000	178880000	111980000	185520000	166370000
H0Y6Y8;B1AL05;Q8N983-4;Q8N983-3;Q8N983-2;Q8N983;Q8N983-6;Q8N983-7;H0YBU8;M0R051	39S ribosomal protein L43, mitochondrial	MRPL43	403450000	340010000	430400000	364100000	286420000	271380000	659130000	624720000	652010000	503680000	407220000	216100000
B1AL69;Q7L3B6	Hsp90 co-chaperone Cdc37-like 1	CDC37L1	53303000	68086000	54577000	42244000	0	0	67420000	69690000	45179000	39502000	40185000	40480000
B1ALA9;P60891;A0A2R8Y7H4;P11908;P11908-2;B7ZB02;A0A0B4J207;P21108;B1ALA7;H7C540;Q15244;A6NMS2;D3YTJ7	Ribose-phosphate pyrophosphokinase 1;Ribose-phosphate pyrophosphokinase 2	PRPS1;PRPS2	4618400000	5423000000	4801400000	3164200000	3434400000	3320600000	5329800000	5082000000	5374700000	3771400000	4341300000	4005000000
B1ALB4;E9PD50;Q92540-2;Q92540;Q92540-5;Q92540-4;D6RAD0;E9PEK3	Protein SMG7	SMG7	21083000	28245000	23994000	27844000	13671000	21858000	27091000	37122000	30002000	25762000	13485000	23591000
B1ALH6;O14832;C9IYS5;O14832-2;C9JR86	Phytanoyl-CoA dioxygenase, peroxisomal	PHYH	173120000	208050000	192550000	35410000	0	37788000	341110000	242000000	386880000	16814000	0	0
B1ALM5;Q9P0T7;F2Z389;B1ALM7;B1ALM4	Transmembrane protein 9	TMEM9	95074000	104320000	128490000	104830000	97923000	99881000	78734000	87268000	29059000	71231000	66714000	87580000
H0Y5C0;B1ALU1;B1ALU3;O95490-2;O95490-5;O95490;O95490-7;O95490-6;O95490-3;O95490-4;H0Y3V3	Latrophilin-2	ADGRL2;LPHN2	104650000	92030000	113660000	0	0	0	76787000	72796000	68150000	0	0	0
B1ALY0;C9JA33;Q8IXS6;Q8IXS6-2;C9JZH4	Paralemmin-2	PALM2-AKAP2;PALM2	59613000	52925000	68850000	72551000	0	0	39543000	48137000	75998000	25291000	0	46981000
B1AMS2;Q14141-2;Q14141-4;Q14141;Q14141-3	Septin-6	2006-09-01	360450000	416610000	355420000	457050000	498390000	465030000	366950000	397630000	347000000	519360000	563950000	668560000
H0YDI1;B1AMW1;P19256-2;P19256-3;P19256	Lymphocyte function-associated antigen 3	CD58	0	0	0	83177000	107350000	98737000	0	0	0	0	0	0
B1ANH0;B1ANG9;Q16774-2;Q16774-3	Guanylate kinase	GUK1	186040000	244550000	204740000	472670000	468110000	428370000	261700000	168690000	165230000	521050000	346280000	504730000
H3BLV0;B1AP13;H7BY55;P08174-4;P08174;P08174-3;P08174-5;P08174-2;P08174-6;P08174-7;B1AP15;A0A2R8YDY3;A0A2R8YEC5	Complement decay-accelerating factor	CD55	34962000	0	0	395410000	443060000	414230000	11083000	59047000	66772000	584220000	1136800000	997550000
B1AQP1;P22415-2;P22415;H0YD59;E9PME6;M0R1C6;M0QYU7;B4DLJ1	Upstream stimulatory factor 1	USF1	31234000	40578000	69685000	97169000	64912000	88216000	54318000	55263000	53567000	69440000	63233000	67423000
B4DY08;G3V4C1;G3V4W0;B2R5W2;P07910-2;P07910-4;G3V2D6;P07910-3;G3V251;G3V5X6;G3V3K6;G3V5V7;A0A0G2JPF8;P0DMR1;O60812;B4DSU6;B2RXH8;B7ZW38;A0A0G2JNQ3;G3V4M8;G3V2H6;B3KT61;E5RG71;Q86SE5;Q86SE5-3	Heterogeneous nuclear ribonucleoproteins C1/C2	HNRNPC	22377000000	21414000000	21834000000	20709000000	19473000000	18491000000	21389000000	22392000000	22507000000	23430000000	19126000000	23731000000
H3BRD5;B2RTY4-2;B2RTY4;B2RTY4-4;B2RTY4-5;H3BMM1;H3BV44;B2RTY4-3	Unconventional myosin-IXa	MYO9A	0	0	0	11576000	23714000	11990000	0	0	0	0	0	0
B3KN26;Q5W125;Q9NWW6-2;Q9NWW6	Nicotinamide riboside kinase 1	NMRK1	0	18038000	18026000	15623000	0	18308000	0	0	15549000	0	0	0
B3KR61;Q5TEU4-2;Q5TEU4	NADH dehydrogenase [ubiquinone] 1 alpha subcomplex assembly factor 5	NDUFAF5	0	0	0	0	0	0	0	0	0	0	23752000	0
B3KRD8;O76054-5;O76054	SEC14-like protein 2	SEC14L2	25941000	0	20187000	12251000	0	15033000	0	18303000	18071000	27605000	22167000	29533000
B3KS98;O15372;A0A087WZK9;E5RJT0;E5RGU4;E5RFH0;E5RFW7;E5RHC7;E5RH59	Eukaryotic translation initiation factor 3 subunit H	EIF3H	3119400000	3432900000	3232100000	2766700000	2961000000	2659700000	3388000000	3314600000	3665400000	2905000000	3255600000	2950300000
B3KTM8;Q9UBU8-2;H0YMJ0;H0YLJ3;Q9UBU8;Q9UBU8-3;H0YM21;H0YMT8;H0YLV1;H0YNE0;H0YNX3;H0YNI8	Mortality factor 4-like protein 1	MORF4L1	337320000	260280000	361260000	340690000	321690000	395360000	276740000	325360000	278480000	455940000	382250000	508960000
B3KUS5;Q70CQ3;F5H8D3;S4R3D1;F5H3L3	Ubiquitin carboxyl-terminal hydrolase;Ubiquitin carboxyl-terminal hydrolase 30	USP30	55017000	50348000	52604000	113680000	76570000	81082000	31996000	56417000	34751000	27694000	61057000	33305000
B3KVL5;Q8TBK6-2;Q8TBK6	Zinc finger CCHC domain-containing protein 10	ZCCHC10	0	0	0	0	0	0	0	0	0	0	0	14565000
B3KVZ3;Q9H3R5;D6RBJ6;H0Y9E6	Centromere protein H	CENPH	0	0	20105000	0	0	0	18677000	0	10750000	0	12701000	0
B3KXX3;Q9UHW9-6;Q9UHW9-5;Q9UHW9-2;Q9UHW9-3;Q9UHW9-4;Q9UHW9;H0YKQ8;H0YMQ9;H0YNJ5	Solute carrier family 12 member 6	SLC12A6	34572000	15279000	9452700	13433000	19538000	24508000	18665000	20599000	27977000	21092000	12679000	27303000
B4DDF4;B4DUT8;Q99439;H3BVI6;Q99439-2;A0A087X271;A0A087X1X5;K7ES69;H3BQH0;U3KPS3;A0A087WV51;K7ER02;B7Z7E1;P51911-2;P51911	Calponin;Calponin-2	CNN2	698670000	829020000	683350000	1322000000	1121400000	992140000	822130000	741040000	743640000	1470800000	1360100000	2130500000
B4E171;B4DDG0;P41732	Tetraspanin;Tetraspanin-7	TSPAN7	19524000	22762000	17454000	0	19928000	20591000	17385000	23114000	27650000	0	0	0
B4DDJ5;P21757-3;P21757	Macrophage scavenger receptor types I and II	MSR1	0	0	12293000	0	0	0	7359500	12140000	9466800	0	0	0
E9PKE0;B4DDL8;P78524-3;P78524-2;P78524;E9PNX7;E9PKM1;E9PLH5;E9PJC3	Suppression of tumorigenicity 5 protein	ST5	23093000	23302000	17913000	0	0	0	16943000	24103000	15817000	0	0	23188000
B4DE15;P78381-5;P78381-2;P78381;P78381-4	UDP-galactose translocator	SLC35A2	135440000	146720000	137880000	173180000	170160000	164910000	115380000	117050000	127830000	130490000	90377000	159760000
B4DEE8;P16455	Methylated-DNA--protein-cysteine methyltransferase	MGMT	442030000	478460000	344370000	139920000	184380000	191960000	315000000	428130000	439050000	281030000	324040000	292030000
B4DEW4;Q8WU10-2;Q8WU10	Pyridine nucleotide-disulfide oxidoreductase domain-containing protein 1	PYROXD1	0	0	0	0	0	0	0	0	4705200	0	0	0
B4DEY6;Q9NZU5-2;Q9NZU5;H7C3D2;C9IYS1	LIM and cysteine-rich domains protein 1	LMCD1	0	23024000	25892000	0	35764000	39653000	38544000	0	0	31614000	45934000	49225000
H0YKA6;H0YLC9;B4DFJ1;Q9BSI4-2;Q9BSI4	TERF1-interacting nuclear factor 2	TINF2	8815600	13708000	7483500	5592800	5758300	0	7156400	0	4759000	0	0	8108200
Q7Z6M4;B4DFP7;C9JNJ7	Transcription termination factor 4, mitochondrial;mTERF domain-containing protein 2 processed	MTERF4	14424000	17957000	14415000	11427000	9952000	10376000	18960000	21238000	18770000	13063000	9028400	13253000
B4DG22;A0A2R8Y603;Q9UK32-2;Q9UK32;A0A2R8Y7S9;D6R910;D6RHW7;D6RE03;D6RA62;V9GXZ1;E7ERL6;O15021-2;O15021-6;O15021-3;Q6P0Q8;Q6P0Q8-2;O15021			16210000	24321000	24148000	0	35947000	0	29010000	27270000	33106000	26629000	36442000	16758000
Q99081;B4DGI9;Q99081-3;F5GY10;B4DZP2;H0YNP8;Q99081-2;Q99081-4;A0A1B0GVR6;H3BTP3;H3BPJ7;A0A1B0GVB8;A0A0D9SG78;E9PH57;A0A1B0GW91;P15884-14;A0A1B0GWD5;H0YNQ5;P15884-3;P15884;P15884-12;P15884-13;P15884-16;P15884-2;P15884-10;P15884-4;P15884-5;P15884-6;P15884-7;P15884-15;P15884-8;P15884-9;P15884-11	Transcription factor 12	TCF12	43004000	55697000	45127000	26052000	0	34836000	0	0	39248000	32411000	49483000	39734000
B4DGQ7;P21860-4;P21860;F8VYK4	Receptor tyrosine-protein kinase erbB-3	ERBB3	18806000	14983000	19850000	0	7303900	0	23369000	23183000	25409000	5865800	0	0
B4DGW0;O75928-2;O75928;A0A087WUY7;O75928-3	E3 SUMO-protein ligase PIAS2	PIAS2	0	14300000	11902000	0	4318100	5953000	10071000	17196000	16175000	9824900	6329500	6527000
H3BRY6;B4DVT3;B4DJL6;Q96SY0-4;Q96SY0-3;Q96SY0	von Willebrand factor A domain-containing protein 9	VWA9	201560000	220740000	246950000	260110000	221160000	257070000	249430000	199740000	203280000	222540000	286260000	170110000
O75390;B4DJV2;A0A0C4DGI3;H0YH82;F8VPF9;F8VPA1;F8W1S4;F8VRP1;F8VX68;H0YIC4;F8W4S1;F8VRI6;F8VTT8;F8VX07;F8VZK9;F8W642;F8VR34;F8VWQ5;F8VU34	Citrate synthase, mitochondrial;Citrate synthase	CS	10162000000	9722500000	10191000000	9606400000	9041600000	8846100000	10776000000	10577000000	10940000000	9430300000	8434100000	9723100000
B4DKY1;P49589-2;E9PRS8;C9JLN0	Cysteine--tRNA ligase, cytoplasmic	CARS	19997000	21351000	21790000	28973000	13568000	17412000	27519000	27066000	25243000	26914000	0	30217000
B4DL54;P49356-2;H0YID9;A0A0C4DGJ7;H0YHA3;Q8WUH1;H0YJ25;H0YHB4;H0YIM9;H0YIM3;Q8WUH1-3;Q8WUH1-2	Protein farnesyltransferase subunit beta	CHURC1-FNTB;FNTB	80139000	78987000	101460000	121970000	100910000	124770000	102450000	103530000	95566000	93547000	0	147800000
B4DLN1;I3L1E8			3596200000	3212700000	3578000000	1866300000	2148400000	1982100000	3435600000	3246900000	3399700000	2405000000	2314300000	2214900000
B8ZZF7;B4DLP0;O00338;O00338-2;H7BZ17	Sulfotransferase;Sulfotransferase 1C2	SULT1C2	14390000	15213000	14334000	0	0	13430000	23247000	33128000	33502000	74112000	84289000	44139000
B4DQP0;Q9H9L7-2;Q9H9L7;Q53H80	Akirin-1;Akirin-2	AKIRIN1;AKIRIN2	0	4537500	0	0	0	0	2999800	2688100	0	0	0	0
B4DR12;K7EIM7;K7EPJ5;O60291-4;O60291;O60291-3;O60291-2;K7ERA1;K7EJN3	E3 ubiquitin-protein ligase MGRN1	MGRN1	81456000	71849000	69058000	56081000	64122000	49258000	56230000	53501000	54524000	49913000	52462000	77239000
B4DR61;P61619;P61619-3;F8W776;Q8TC24;Q9H9S3-2;Q9H9S3-3;Q9H9S3;H7C1Q9;C9JXC6;H7C069;A6NK38;F2Z2C7;A6NIF9;C9JJV4;H7C1S8	Protein transport protein Sec61 subunit alpha isoform 1	SEC61A1	2813000000	1713900000	2396100000	1997000000	1556400000	1652000000	974320000	2309500000	1411400000	2329300000	1457400000	1880000000
B4DR80;Q9Y6E0-2;H0Y630;Q9Y6E0;Q5JV98;Q5JV99	Serine/threonine-protein kinase 24;Serine/threonine-protein kinase 24 36 kDa subunit;Serine/threonine-protein kinase 24 12 kDa subunit	STK24	804380000	936390000	886770000	1092100000	1005400000	1066800000	1024800000	970210000	950640000	1178400000	1169800000	965040000
B4DRN8;Q5W0Z9-4;Q5W0Z9-3;Q5W0Z9	Palmitoyltransferase;Probable palmitoyltransferase ZDHHC20	ZDHHC20	9195400	11802000	9838100	8244100	5633500	5237900	12126000	10382000	15354000	0	0	6444300
B4DUA7;Q9NX70;M0R0U2;M0R3F3;Q9NX70-2;M0R0A0	Mediator of RNA polymerase II transcription subunit 29	IXL;MED29	45368000	53234000	33986000	45951000	43359000	45835000	45130000	37290000	38022000	46163000	46528000	37472000
B4DUJ5;Q8IWP9	Coiled-coil domain-containing protein 28A	CCDC28A	8664600	6246100	6913200	0	0	3914300	6405700	10242000	7387600	6692800	0	7172700
B4DV78;H7C0B6		VIL1	12441000	8675900	12548000	0	0	0	8694700	10153000	11038000	6940700	0	10399000
B4DXC8;Q9Y5B8;Q9Y5B8-2;E9PNU1	Nucleoside diphosphate kinase 7	NME7	75481000	83068000	65358000	96274000	99761000	80423000	93052000	58419000	78408000	70755000	88729000	42699000
F8W1R9;B4DY26;P36897-3;P36897;P36897-2;F8VXZ5;Q8NER5-3;Q8NER5-4;Q8NER5	Receptor protein serine/threonine kinase;TGF-beta receptor type-1;Activin receptor type-1C	TGFBR1;ACVR1C	0	0	0	0	0	24059000	17148000	14739000	0	0	0	0
B4DYM4;Q9UBS9;Q9UBS9-2	SUN domain-containing ossification factor	SUCO	7740300	0	0	18295000	18198000	28010000	0	0	0	0	0	18184000
B4E0E3;G3V1M5;Q9H6X4-2;Q9H6X4-3;Q9H6X4	Transmembrane protein 134	TMEM134	19824000	18336000	22145000	17547000	40748000	0	13214000	16148000	0	0	0	21556000
B4E0T2;P50542-2;P50542;P50542-4;P50542-3;F5H5C0;J3KPV0;H0YGT8;F5H432;F5GXX3;F5H205;F5H637;F5H3X7	Peroxisomal targeting signal 1 receptor	PEX5	117820000	138710000	132550000	64297000	58389000	70163000	108420000	135320000	135620000	105230000	80775000	100430000
Q8NBY1;B4E0Y9;Q9P289-2;Q9P289;Q9P289-3	Serine/threonine-protein kinase 26	STK26	440240000	394920000	404050000	360320000	397410000	436250000	453380000	433120000	458270000	324060000	311690000	149460000
H0YH18;F5H0I7;B4E127;G8JL98;Q13569	G/T mismatch-specific thymine DNA glycosylase	TDG	44999000	36113000	36687000	27731000	35130000	36521000	31956000	41988000	40467000	42396000	51152000	0
E5RGY0;B4E1G1;Q9BUN8-2;Q9BUN8	Derlin-1	DERL1	103970000	65723000	110330000	117350000	125290000	122240000	66033000	120580000	62647000	75269000	0	113950000
B4E1H8;Q9BQQ3-3;Q9BQQ3	Golgi reassembly-stacking protein 1	GORASP1	47334000	53321000	39370000	53207000	53084000	47728000	51586000	53859000	47346000	0	0	34520000
B4E1Q4;O14730-2;O14730;J3QQL5	Serine/threonine-protein kinase RIO3	RIOK3	59594000	77829000	70824000	113280000	167820000	89293000	75377000	63560000	90310000	91253000	140630000	63353000
E7ETN3;B4E1Z4;P00751;A0A0G2JH38;P00751-2;H7C5H1	Complement factor B;Complement factor B Ba fragment;Complement factor B Bb fragment	CFB	0	0	34245000	43517000	92159000	69745000	35076000	39033000	33268000	29577000	32625000	160870000
H7C5F9;B4E2D5;R4GND2;F6S7C4;Q8NEM7-2;Q8NEM7;Q8NEM7-3	Transcription factor SPT20 homolog	SUPT20H	0	0	0	0	0	0	0	0	0	0	0	0
B4E2Q0;P98194-4;P98194;H0Y9V7;P98194-2;P98194-3;P98194-5;P98194-8;P98194-9;P98194-6;P98194-7;H0Y8X9;H0Y9S7;D6R9U9	Calcium-transporting ATPase;Calcium-transporting ATPase type 2C member 1	ATP2C1	700250000	589270000	731020000	1084200000	1027600000	1125700000	592270000	733370000	632830000	1030500000	999480000	1026000000
B5MBW9;Q8WYQ3	Coiled-coil-helix-coiled-coil-helix domain-containing protein 10, mitochondrial	CHCHD10	80509000	60971000	68886000	100960000	107830000	125440000	81177000	73649000	75952000	159440000	220920000	210170000
B5MBY8		C2orf73	0	79350000	0	0	0	0	0	0	0	75456000	0	0
C9JLP2;B5MC02;Q8NFT2-3;Q8NFT2-2;Q8NFT2	Metalloreductase STEAP2	STEAP2	0	0	0	0	0	22352000	0	0	0	0	0	17627000
B5MC22;Q9UDX5;F8WEN7;Q9UDX5-2	Mitochondrial fission process protein 1	MTFP1	49699000	24198000	74089000	0	0	0	0	0	0	0	0	0
B5MCA1;Q96G28;Q96G28-2;B5MC35;B5MD16	Cilia- and flagella-associated protein 36	CFAP36	88113000	43382000	59303000	83942000	102060000	106250000	40175000	38309000	38779000	66213000	71346000	70172000
P16422;B5MCA4;C9JKY3	Epithelial cell adhesion molecule	EPCAM	1794600000	1491300000	1734100000	637470000	645600000	536730000	2185600000	2095700000	1996400000	1271600000	1198300000	1448400000
B5MCF9;O00541;O00541-2;B3KXD6;H7BYY8;H7C267	Pescadillo homolog	PES1	1583200000	1387600000	1559800000	1315900000	1329100000	1224900000	1346900000	1684300000	1385700000	1603700000	1478900000	1610600000
B5MCR8;Q6NXT4-4;Q6NXT4;Q6NXT4-2;Q6NXT4-3	Zinc transporter 6	SLC30A6	37105000	37916000	51232000	69109000	78903000	107550000	58989000	55099000	51481000	87852000	59662000	0
H7C0E9;B5MCU0;A0A0U1RRA6;B5MCG9;Q9Y2K5-3;Q9Y2K5-2;Q9Y2K5;H0YIX9;Q9UBL0	R3H domain-containing protein 2	R3HDM2	0	26510000	29173000	0	25803000	28166000	0	0	0	0	0	0
H7C128;H7C179;B5MCW3;H7C127;Q9H0E9-4;Q9H0E9-2;Q9H0E9;Q9H0E9-3;H7C2P4;F8WBH2;C9JV05;F8WDX5;D6RID0;F8WCS7;H0YAH7	Bromodomain-containing protein 8	BRD8	247280000	207710000	136260000	151120000	134490000	164260000	149310000	241350000	143210000	198330000	210200000	173650000
B5MD00;Q9P0U1	Mitochondrial import receptor subunit TOM7 homolog	TOMM7	122820000	0	112070000	98451000	47001000	117870000	104340000	232230000	94984000	117980000	245640000	121910000
B5MD46;Q9BXI6;Q9BXI6-2;H0Y2U5;H7C1Q1;H7C471;H0Y5R9;F8WCD1;F8W9Y7	TBC1 domain family member 10A	TBC1D10A	90930000	45442000	57035000	160270000	152250000	133290000	46136000	54578000	61068000	108480000	79193000	83385000
B5MD58;P36956;P36956-4;P36956-3;P36956-2;K7EIW8;K7EMT8;K7EMD1	Sterol regulatory element-binding protein 1;Processed sterol regulatory element-binding protein 1	SREBF1	13204000	11005000	12621000	0	15581000	13685000	11181000	24771000	11045000	0	0	24841000
B5MDU6;Q9H6V9;Q9H6V9-2;B5MCE2;B4DRG3;A0A0A0MSH6;Q9H6V9-3;C9JUM0;D3YTH1;B5MCU4;Q9H6V9-4;C9JHU6	UPF0554 protein C2orf43	LDAH;C2orf43;FLJ21820	344690000	353430000	346390000	265070000	333640000	334400000	378970000	412710000	395980000	255820000	256950000	216670000
E7EW69;B5ME97;Q9P0V9;Q9P0V9-2;E7EX04;Q9P0V9-3;C9JEW2;C9JNR7;F5GYV2;F5H1W3;F8WC85;C9JEQ7;F5H1F2	Septin-10	2010-09-01	990520000	1195900000	998470000	576710000	597430000	594220000	1220600000	1091100000	1223700000	720180000	830320000	729500000
B7WPE2;Q32P44;G3V195;G3V1D0;H0Y3M3;Q32P44-2;H7C355;C9J6V3;E9PJV5;E9PSB4;Q32P44-3	Echinoderm microtubule-associated protein-like 3	EML3	101720000	73404000	101370000	110670000	142220000	150710000	81515000	107820000	99044000	126390000	102540000	151360000
E5RI52;B7Z1T6;Q6NTE8-2;Q6NTE8;E5RHY8;E5RHV0	UPF0544 protein C5orf45	C5orf45	21424000	22523000	24581000	12907000	17389000	9334600	20966000	26610000	13552000	12868000	0	22680000
B7Z2R7;Q5T8D3-2;Q5T8D3-3;Q5T8D3;X6RDD7;Q5T8E0;Q5T8D3-4;A0A087X0B8	Acyl-CoA-binding domain-containing protein 5	ACBD5	1952500000	1736800000	1895300000	1204700000	935450000	931320000	1814300000	1872000000	1795700000	1119300000	1005500000	1028900000
C9J2P0;H7C061;B7Z306;P51965-2;P51965;A0A087X283;P51965-3;C9J180	Ubiquitin-conjugating enzyme E2 E1	UBE2E1;UBE2E2	139540000	159090000	172290000	132910000	117760000	129130000	146460000	145090000	147360000	160540000	145730000	170440000
B7Z3C4;F6SYP7;P98153-2;P98153	Integral membrane protein DGCR2/IDD	DGCR2	0	0	24380000	31792000	0	33245000	0	0	0	22245000	25750000	0
B7Z3R2;Q9ULQ1;Q9ULQ1-3;H0YIK4;Q9ULQ1-2	Two pore calcium channel protein 1	TPCN1	18611000	24521000	15776000	25629000	38825000	38378000	12907000	25262000	18515000	15839000	0	15232000
B7Z493;E9PJX4;F8VWL3;Q96M96;F8W1R0;Q96M96-2;E9PQT1;E9PNX0;Q96M96-3	FYVE, RhoGEF and PH domain-containing protein 4	FGD4	162000000	116860000	135880000	72849000	82242000	61728000	185250000	195010000	152750000	79048000	118100000	112740000
B7Z4K4;Q9UET6;Q9UET6-2	Putative tRNA (cytidine(32)/guanosine(34)-2-O)-methyltransferase	FTSJ1	28158000	36693000	26828000	40605000	36173000	35522000	38635000	47988000	34645000	41642000	33665000	64121000
F5H7S3;H7BYY1;B7Z596;P09493-2;H0YKJ4;H0YK48;A0A494BZZ2;P09493-5;H0YNC7;H0YL42;A0A494C0V8;H0YN06	Tropomyosin alpha-1 chain	TPM1	297260000	332370000	381970000	495060000	424670000	353040000	346810000	347750000	327750000	403340000	394490000	388980000
B7Z6D5;Q96GQ7;A0A087X059;A0A087WYH5	Probable ATP-dependent RNA helicase DDX27	DDX27	1430800000	1537100000	1540600000	1486900000	1618800000	1601500000	1633100000	1540000000	1583100000	1933900000	1841800000	1978500000
B7Z7F3;Q9H6Z4-2;K7ESQ0;K7EIJ4;K7EMH9;K7ENJ2;K7EID7;K7ENB9;K7EPW1;K7EMT3	Ran-binding protein 3	RANBP3	0	2677100	2954500	3438700	10496000	5809700	2332500	2576200	2029200	0	0	0
B7Z8V7		NADK2	13251000	18198000	18417000	0	0	0	22891000	15419000	14920000	0	0	0
F5H8L0;B7ZAP0;Q5R372-7;Q5R372-8;Q5R372-6;Q5R372-5;A0A0U1RQV7;E9PS63	Rab GTPase-activating protein 1-like, isoform 10;Rab GTPase-activating protein 1-like	RABGAP1L	61963000	55588000	65982000	50691000	41215000	41650000	56233000	42490000	47651000	36489000	21952000	34248000
B7ZAQ6-2;B7ZAQ6-3;P0CG08;B7ZAQ6;A0A087WW82;U3KPV2;E9PKY3;A0A087WW78	Golgi pH regulator A;Golgi pH regulator B	GPR89A;GPR89B	64898000	48503000	82786000	109230000	110080000	107000000	0	58430000	0	71990000	140820000	114470000
B7ZBB8	Protein phosphatase 1 regulatory subunit 3G	PPP1R3G	11596000	11406000	8478400	0	0	0	9477000	5773500	13993000	0	0	0
B7ZBM3;Q8IVH2-3;Q8IVH2-2;Q8IVH2;A2A312	Forkhead box protein P4	FOXP4	41262000	46048000	39677000	24060000	21267000	28289000	30475000	42233000	35687000	51859000	39804000	41019000
B7ZBQ3;Q9H944;A6PVP4;Q9H944-2;B7ZBQ1	Mediator of RNA polymerase II transcription subunit 20	MED20	118370000	123880000	138380000	113070000	134310000	142150000	109980000	100580000	101700000	72780000	65460000	120730000
B7ZC38;Q9NR46;B7ZC39;Q9NR46-2;F8WFB9;G5E9J1	Endophilin-B2	SH3GLB2	144840000	123060000	156700000	354030000	386880000	372990000	102130000	102050000	145660000	175590000	449250000	225400000
B7ZKQ9;Q8WTV0-4;Q8WTV0-2;Q8WTV0-5;Q8WTV0;F5H4X0;Q8WTV0-3;F5H5E8	Scavenger receptor class B member 1	SCARB1	584240000	578640000	587330000	184200000	191380000	192540000	922360000	834600000	795840000	502910000	539250000	594060000
B7ZL14;Q96RU3-4;Q96RU3-3;Q96RU3-5;Q96RU3-2;Q96RU3;H0Y7W6	Formin-binding protein 1	FNBP1	24508000	35548000	41809000	39339000	67511000	38372000	0	42035000	36351000	28030000	32315000	74639000
B7ZL91;Q16819	Metalloendopeptidase;Meprin A subunit alpha	MEP1A	131240000	129330000	158950000	0	0	0	154220000	179790000	146410000	0	0	0
B7ZLQ5;P28370	Probable global transcription activator SNF2L1	SMARCA1	2086800000	1565800000	2204200000	1591600000	1682600000	1532700000	1198000000	1733300000	1405400000	1400400000	1213300000	1579300000
E5RJM0;B7ZLQ8;Q17RY0-2;Q17RY0;E5RFP2;Q17RY0-3;H0YBG1	Cytoplasmic polyadenylation element-binding protein 4	CPEB4	137360000	148650000	157970000	144300000	159140000	169760000	158200000	144760000	153020000	160960000	210150000	152100000
F5H562;E7ET55;F5H748;B7ZLR4;P35670-2;P35670-4;P35670;P35670-3;A0A0U1RQY8;P35670-5	Copper-transporting ATPase 2;WND/140 kDa	ATP7B	44951000	47777000	39876000	21977000	34132000	11571000	52810000	57604000	38002000	29829000	0	0
B7ZM87;A0A075B7B5;O75044;Q5VZB4;P0DMP2;A0A286YEY3;P0DJJ0;A0A075B7C8;A0A075B7E6	SLIT-ROBO Rho GTPase-activating protein 2	SRGAP2	179690000	197500000	181960000	190520000	189160000	186710000	142220000	143020000	129650000	155010000	191210000	128710000
B8ZZD4;Q86VP1-3;Q86VP1-4;Q86VP1-2;Q86VP1;H7C3L5;V9GZ06	Tax1-binding protein 1	TAX1BP1	124010000	152730000	131470000	219130000	220270000	258760000	137330000	153700000	115990000	193890000	151110000	163090000
B8ZZF2;Q8N9V3-2;Q8N9V3	WD repeat, SAM and U-box domain-containing protein 1	WDSUB1	0	0	17976000	6642100	9328600	0	14930000	12732000	16620000	0	0	0
B8ZZN6;P63165;B8ZZJ0;B9A032;B8ZZ67;G2XKQ0;P63165-2	Small ubiquitin-related modifier 1	SUMO1	2403700000	1799000000	2080100000	2637700000	3078900000	2812600000	1095300000	1444900000	1480400000	1355800000	989520000	1204600000
B8ZZQ6;P06454-2;P06454;B8ZZA1;B8ZZW7;H7C2N1	Prothymosin alpha;Prothymosin alpha, N-terminally processed;Thymosin alpha-1	PTMA	6243800000	7067200000	4423500000	1302800000	1137300000	929340000	5537600000	5665200000	6029700000	3397900000	1786400000	3020600000
B8ZZU6;P15336-5;P15336;E9PBF9;H7C2N6;P15336-7;P15336-4;E9PEK8;P15336-3;F5H629;P15336-2;C9JCI8;K7ESA4;K7ELQ4;P17544-5	Cyclic AMP-dependent transcription factor ATF-2	ATF2	500400000	556570000	519000000	261030000	236100000	360510000	559200000	539440000	591980000	300190000	303320000	302300000
B8ZZV6;B8ZZY4;Q8WV83-2;Q8WV83	Solute carrier family 35 member F5	SLC35F5	0	0	20497000	0	27390000	23063000	0	15884000	19463000	33090000	22578000	25708000
H0YHF1;B8ZZX2;B8ZZV9;Q9H8M1-2;Q96MF6-3;Q96MF6-2;Q9H8M1;Q96MF6	Coenzyme Q-binding protein COQ10 homolog B, mitochondrial;Coenzyme Q-binding protein COQ10 homolog A, mitochondrial	COQ10A;COQ10B	0	0	0	0	0	0	0	0	0	0	0	9430900
B8ZZW5;Q8NBF6;Q8NBF6-2;H7C0I1;A0A1W2PRP5	Late secretory pathway protein AVL9 homolog	AVL9	190420000	187950000	208640000	184370000	209070000	180590000	158620000	162920000	169200000	198810000	128890000	164720000
B8ZZY8;Q9NRN9;H7C0M7;E7EMN2;B8ZZE3;B8ZZC8	Methyltransferase-like protein 5	METTL5	0	28019000	0	0	0	0	0	53154000	0	0	0	26871000
F8W8K9;G5E966;B8ZZZ1;Q96PC3-3;Q96PC3-4;Q96PC3;Q96PC3-2	AP-1 complex subunit sigma-3	AP1S3	37772000	41335000	0	0	0	0	43460000	47008000	39833000	0	0	0
B9A057;Q86WW8	Cytochrome c oxidase assembly factor 5	COA5	197940000	175030000	199030000	142240000	136510000	140140000	177620000	195340000	194150000	117770000	122640000	107340000
B9A058;F8W8A6;H7C1A5;H7C126		HIBCH	0	0	0	0	0	0	0	0	0	0	0	27805000
J3KMX2;B9EGA3;Q92925-3;Q92925;Q92925-2;J3QWB6;J3QQL7	SWI/SNF-related matrix-associated actin-dependent regulator of chromatin subfamily D member 2	SMARCD2	1083300000	926100000	1136600000	1183300000	1277400000	1125600000	836130000	934420000	894720000	970410000	823480000	1133400000
C4AMC7;Q6VEQ5;A8K0Z3;A8MWX3	Putative WAS protein family homolog 3;WAS protein family homolog 2;WAS protein family homolog 1;Putative WAS protein family homolog 4	WASH3P;WASH2P;WASH1;WASH4P	0	0	0	0	0	0	0	0	18060000	0	0	0
C4B7M2;Q96JI7-2;Q96JI7-3;Q96JI7;H0YKY8;H0YLK7	Spatacsin	SPG11	22034000	8370500	9013300	8469200	10448000	11422000	0	0	0	10351000	5675300	0
C9IYN3;D6W592;Q8WVV9-4;Q8WVV9;B7WPG3;Q8WVV9-5;Q8WVV9-3;Q8WVV9-2;H7C464;H7BXH8;C9JJZ7	Heterogeneous nuclear ribonucleoprotein L-like	HNRNPLL;HNRPLL	948890000	959000000	947600000	1083000000	1165700000	1179400000	919770000	943580000	945380000	1257900000	960860000	1136500000
C9JLH5;C9JA82;C9J2D6;C9J9N8;C9JEX8;C9IYN7;Q0PNE2-2;Q0PNE2;F8WE64	Elongator complex protein 6	ELP6	82909000	70730000	92917000	41378000	46526000	65774000	70260000	59976000	75074000	52446000	89543000	43627000
C9JF62;C9JSK8;C9IZ93;C9J9P8;Q969M7-3;Q969M7-7;Q969M7-6;Q969M7;Q969M7-2;C9JFD2	NEDD8-conjugating enzyme UBE2F	UBE2F	0	20365000	0	16497000	0	0	0	13245000	10512000	0	0	14458000
C9IZA5;C9JUP7		VCP	0	0	0	11432000	14617000	15141000	9467400	0	0	12307000	0	0
C9IZF6;P41247;P41247-2	Patatin-like phospholipase domain-containing protein 4	PNPLA4	32093000	19039000	25916000	30052000	19666000	15402000	23683000	13716000	16834000	36554000	22621000	33329000
C9IZL5;C9JC87;O00189;C9JMG3;C9JWL4;H7C0A0;H7BZV3;H0Y6K1;F8WCR6	AP-4 complex subunit mu-1	AP4M1	42012000	34801000	39959000	83388000	64620000	63292000	45539000	37235000	37305000	39890000	41626000	30084000
C9J038;Q9GZV5;C9JR84;C9JQS8;C9J337	WW domain-containing transcription regulator protein 1	WWTR1	36191000	46055000	48980000	35722000	47478000	41561000	44714000	52174000	55516000	54479000	49838000	0
C9J0A7;Q9UQN3;A0A087WW88;Q9UQN3-2	Charged multivesicular body protein 2b	CHMP2B	525680000	492840000	633460000	453050000	551900000	563460000	419340000	463730000	495670000	297570000	274790000	254140000
C9J0E4;P01040	Cystatin-A;Cystatin-A, N-terminally processed	CSTA	58208000	57246000	0	51859000	55034000	50252000	46115000	51675000	48598000	61406000	73206000	0
C9J0I9;Q86WB0;Q86WB0-3;Q86WB0-2;F8WAU5;F8WBD7;F8WDK5;F8WF13	Nuclear-interacting partner of ALK	ZC3HC1	625420000	726610000	583460000	608080000	581390000	645620000	601950000	672650000	687170000	725760000	711810000	686980000
C9J0J7;G5E9Q6;P35080-2;C9JQ45	Profilin;Profilin-2	PFN2	1564100000	1585600000	1608800000	1657000000	1847600000	1672400000	1450000000	1372100000	1548500000	1864200000	2019800000	1733600000
C9J0K6;P30626-2;P30626;P30626-3;B4DHQ6;E9PG82	Sorcin	SRI	1224400000	1340700000	1394700000	1279000000	1348700000	1491200000	1167700000	1235200000	1345900000	1517400000	1456900000	1847300000
C9JE98;C9J0Q5;C9JFD3;Q9Y618-5;Q9Y618-4;Q9Y618;H0YGK8;C9J330;C9JQE8;H7C0P3;C9J7T7;A0A384DVL6;Q9Y618-2	Nuclear receptor corepressor 2	NCOR2	26226000	48139000	55839000	24801000	28476000	31241000	58829000	57545000	75321000	54851000	0	0
C9J1C6;Q9P0P0;F8WBU5;C9J391;H7C426	E3 ubiquitin-protein ligase RNF181	RNF181	88256000	86810000	53865000	80566000	95423000	57499000	78588000	53143000	63715000	99803000	135770000	96718000
C9J236;C9JS27;Q7L592;Q7L592-2;C9JP36;C9JEL7	NADH dehydrogenase [ubiquinone] complex I, assembly factor 7	NDUFAF7	226100000	166240000	154860000	144480000	156010000	147710000	172550000	178360000	158110000	156550000	146060000	112080000
C9J2P9;Q75N03;Q75N03-2;C9K074	E3 ubiquitin-protein ligase Hakai	CBLL1	53593000	58724000	53931000	45522000	32604000	24569000	0	0	48039000	50884000	54687000	0
C9J2Y9;P30876;A0A1W2PPT5;C9J4M6	DNA-directed RNA polymerase;DNA-directed RNA polymerase II subunit RPB2	POLR2B	1824900000	1686000000	1739400000	1992500000	2116200000	2219800000	1770600000	1790100000	1715100000	2182100000	2595400000	2387300000
C9J384;Q9BQ75-2;Q9BQ75;H7C515	Protein CMSS1	CMSS1	463460000	407900000	418000000	360680000	282560000	245560000	392880000	384740000	405950000	361540000	272450000	406430000
C9J3D7;Q9UKG9;Q9UKG9-3;Q9UKG9-2	Peroxisomal carnitine O-octanoyltransferase	CROT	64510000	177780000	149900000	17908000	29278000	17518000	182060000	112690000	180710000	16344000	17525000	12616000
C9JJ39;C9J3F5;C9JPX5;C9JKL2;O95772-2;O95772	MLN64 N-terminal domain homolog	STARD3NL	0	0	0	0	0	0	0	18201000	7870000	0	0	0
Q8IUF1;C9J3G2;A0A087WYD2;Q9BRT8-4;Q5RIB5;E7EUZ7;Q5JTY2;A0A087WTC0;F8WEU0;F8WEG4;Q6NVZ8;A0A0B4J2E3;A0A087WZQ3;A0A0B4J1T6;Q5RIB3;A0A087X1C0;Q5RIA9-2;H0Y857	COBW domain-containing protein 2	CBWD2	0	17294000	0	0	0	0	21878000	21115000	26346000	0	26118000	0
C9J3R8;O60513;E7ETS9;C9J4S5;C9J5S0;C9JA31	Beta-1,4-galactosyltransferase 4;N-acetyllactosamine synthase;Lactotriaosylceramide beta-1,4-galactosyltransferase	B4GALT4	130270000	92132000	193540000	149950000	176560000	193890000	47046000	58876000	50792000	58035000	68721000	73631000
C9J406;H7C463		IMMT	103930000	60284000	90199000	102390000	97251000	112480000	62908000	98312000	60980000	88526000	112560000	126690000
C9J977;C9J461;C9J872;Q14188-7;Q14188-6;Q14188-2;Q14188-3;Q14188-4;Q14188-5;Q14188-8;Q14188	Transcription factor Dp-2	TFDP2	0	0	0	11023000	0	8708500	7917800	0	0	8483000	7944800	0
F8WAU7;C9JR77;C9J463;C9JZ27;C9JDJ8;C9JRY4;C9JNZ0;Q96IW7	Vesicle-trafficking protein SEC22a	SEC22A	0	0	0	0	0	0	17259000	0	0	0	0	0
C9J494;Q9H000;Q9H000-2	Probable E3 ubiquitin-protein ligase makorin-2	MKRN2	267540000	232630000	257210000	183960000	228440000	197420000	248290000	242530000	282900000	170030000	266740000	172140000
C9J4J4;Q02080-2;B8ZZJ5;B3KQ23;H3BNR1;Q02080	Myocyte-specific enhancer factor 2B	MEF2B	13855000	8174400	12419000	18993000	12982000	14438000	13434000	0	0	74783000	21667000	25882000
C9J4K0;Q9BVC5-2;Q9BVC5	Ashwin	C2orf49	119980000	106130000	137450000	196620000	194140000	204180000	142290000	161130000	129080000	167970000	0	121170000
C9J4X5;Q9H160-2;Q9H160	Inhibitor of growth protein 2	ING2	0	0	0	0	0	0	0	9115800	0	0	0	0
C9J5J4;H7C4T7;H0Y322;Q5TKA1-3;Q5TKA1;Q5TKA1-2	Protein lin-9 homolog	LIN9	37058000	29507000	38556000	45268000	55385000	30778000	37287000	37895000	38568000	47352000	92275000	72922000
C9J634		PDHB	15236000	0	12525000	0	0	0	0	0	0	0	0	0
C9J712;P35080;C9J2N0	Profilin-2;Profilin	PFN2	618560000	786480000	677300000	306060000	310880000	352590000	1002400000	843230000	1080200000	591630000	610640000	372120000
F8W6L0;E7ERK1;F5GXT2;O43374-2;O43374;C9J798;H0YB35;H0YBU2;E5RK78	Ras GTPase-activating protein 4;Putative Ras GTPase-activating protein 4B	RASA4B;RASA4	19578000	18437000	25282000	0	0	0	18495000	18302000	18541000	0	24472000	0
F8WCJ1;C9J7B5;Q9GZV4;C9J4W5	Eukaryotic translation initiation factor 5A;Eukaryotic translation initiation factor 5A-2	EIF5A2	0	17195000	15441000	15050000	0	0	0	17450000	0	22590000	0	17358000
C9J7E5;Q9Y5L0;Q9Y5L0-1;Q9Y5L0-3;Q9Y5L0-5;E9PFH4	Transportin-3	TNPO3	2450800000	2720900000	2275500000	1746900000	1682600000	1611400000	2739600000	2336300000	2775800000	1970000000	1912300000	1951900000
C9J7I0	UBAP1-MVB12-associated (UMA)-domain containing protein 1	UMAD1	9157400	10991000	18969000	0	0	0	22846000	29534000	0	20175000	0	9049500
C9J7K9;O15162-2;O15162;C9J0H3;C9J9P4;C9JE06;H7C5I5	Phospholipid scramblase 1	PLSCR1	32939000	25053000	30603000	62999000	72945000	89239000	33254000	20447000	27471000	51459000	39248000	50406000
C9J879;Q9H3R0-2;Q9H3R0;Q9H3R0-3;Q9H3R0-4;A0A0A0MSR6	Lysine-specific demethylase 4C	KDM4C	14660000	16749000	20150000	0	0	0	16359000	12732000	17536000	0	0	0
C9J8B8;Q969S8-2;Q969S8-4;Q969S8;Q969S8-5	Histone deacetylase 10	HDAC10	45430000	40159000	22420000	63993000	60291000	54868000	56802000	21688000	43700000	81165000	162260000	63832000
C9JA08;Q96D46;C9IY70;C9IZW9;C9K0C2;C9J0B9	60S ribosomal export protein NMD3	NMD3	260030000	252480000	260850000	175530000	201540000	220630000	241960000	251850000	242910000	200440000	236320000	233700000
C9JA28;Q9UNL2;Q9UNL2-2	Translocon-associated protein subunit gamma	SSR3	327180000	184720000	402660000	279990000	263980000	262770000	166980000	317690000	172460000	336010000	429200000	321150000
C9JA69;Q8WY36-2;Q8WY36;C9J8D0	HMG box transcription factor BBX	BBX	28456000	17272000	19630000	0	30607000	28839000	0	0	0	0	0	0
C9JAW5;C9JNU6;Q9Y241;Q9Y241-2;A8MV81	HIG1 domain family member 1A, mitochondrial	HIGD1A	1296300000	1171400000	860550000	702120000	737590000	756860000	1209300000	1231100000	1298700000	1172100000	1156700000	1322700000
Q16595;C9JAX1;H7C585	Frataxin, mitochondrial;Frataxin intermediate form;Frataxin(56-210);Frataxin(78-210);Frataxin mature form	FXN	197480000	174280000	184080000	191940000	172730000	197300000	207380000	215520000	242110000	131830000	199010000	157100000
C9JIB2;C9JVC6;C9JPS6;C9JPS5;C9JB28;Q6ZMH5	Zinc transporter ZIP5	SLC39A5	11965000	10119000	13850000	0	0	0	0	0	10115000	0	0	0
C9JB30;Q9UPY8-2;Q9UPY8	Microtubule-associated protein RP/EB family member 3	MAPRE3	71444000	77014000	72923000	81175000	90112000	124920000	72934000	65746000	69213000	85171000	64187000	33595000
C9JEU5;C9JC84;P02679-2;P02679;C9JPQ9;C9JU00	Fibrinogen gamma chain	FGG	1241000000	1442200000	1206800000	921860000	954020000	1060500000	911260000	927630000	974740000	527900000	534430000	594470000
E9PQX9;C9JCC6;Q14919;Q14919-2;E9PMW2;E9PNC7	Dr1-associated corepressor	DRAP1	125820000	168000000	144650000	220620000	207040000	226350000	138390000	129230000	124820000	133510000	110210000	159030000
C9JCN8;P15408-3;P15408;P15408-2	Fos-related antigen 2	FOSL2	0	0	31134000	81514000	115560000	87233000	0	0	0	69274000	79558000	83639000
C9JDS9		TUBA4A	72004000	58884000	37216000	22096000	9418100	15634000	44758000	42616000	48935000	55411000	36696000	35385000
C9JG97;C9JEH3;Q13685;C9JTS3;H7C0R2	Angio-associated migratory cell protein	AAMP	1159500000	1348200000	1319200000	1153000000	1176000000	941480000	1534400000	1489600000	1547100000	926090000	873140000	1312800000
C9JEJ2;P49585;C9J050;C9J2E1;H7C1T3;C9JPY0;C9JVS0;F8WAZ5;H7BZN1;Q9Y5K3-2;Q9Y5K3-4;Q9Y5K3-3;Q9Y5K3;F8WBU2;F2Z2B1	Choline-phosphate cytidylyltransferase A	PCYT1A	1403300000	1648600000	1451100000	1423900000	1517000000	1342400000	1308700000	1188800000	1335800000	1043300000	1163900000	1120500000
F8WBT9;C9JX71;C9JF17;P05090	Apolipoprotein D	APOD	0	0	0	0	0	0	16399000	21553000	20145000	0	0	0
C9JFE4;Q13098-7;Q13098;Q13098-5;A8K070;A0A096LPJ3;A0A096LP07;Q13098-6;J3KSA5;J3QLT0;J3KRJ4;J3QS88;J3KTB0;J3QL53;J3QS84;J3KRE8;J3QLE8;J3QQX0	COP9 signalosome complex subunit 1	GPS1	1897100000	2250100000	2066800000	2284100000	2117200000	2171200000	2062600000	2267600000	2393700000	1906400000	1941500000	1910800000
C9JFR7;P99999;CON__P62894	Cytochrome c	CYCS	8485400000	8774100000	9842200000	13966000000	14263000000	14114000000	9920700000	10526000000	10103000000	12384000000	13522000000	12301000000
C9JI46;Q8N3X6;Q8N3X6-2	Ligand-dependent nuclear receptor corepressor-like protein	LCORL	0	3873400	4359700	9946700	12445000	10550000	4494800	5605200	0	4255900	0	4754900
C9JIF9;P13798;H7C393;H7C1U0;C9JLK2;F8WEH5	Acylamino-acid-releasing enzyme	APEH	2313700000	2524400000	2337400000	1408500000	1444500000	1485300000	2421600000	2436800000	2414400000	1452500000	1831300000	1639600000
C9JJ19;P82930	28S ribosomal protein S34, mitochondrial	MRPS34	463400000	497540000	469450000	368460000	317460000	309750000	493470000	455420000	477660000	336650000	336150000	414980000
C9JJN9;Q8N3P4-3;Q8N3P4;Q8N3P4-2;H7C058	Vacuolar protein sorting-associated protein 8 homolog	VPS8	60536000	59797000	55741000	72318000	58830000	52645000	55224000	56925000	47687000	62407000	62002000	64149000
C9JKA9;Q9NS87-2;Q9NS87;D6RCT7;Q9NS87-4;H7C1K7;H7BZT2;Q9NS87-3	Kinesin-like protein KIF15;Kinesin-like protein	KIF15	19430000	11276000	12727000	0	0	0	0	0	0	0	0	0
U3KQU8;C9JLB7;Q96HP4	Oxidoreductase NAD-binding domain-containing protein 1	OXNAD1	33402000	41414000	33381000	11201000	8315500	6765600	43014000	32833000	45318000	22589000	0	22596000
C9JLU1;P52434;P52434-3;P52434-4;P52434-2;P52434-5	DNA-directed RNA polymerases I, II, and III subunit RPABC3	POLR2H	2035700000	2240400000	2003700000	1253200000	1078600000	1067200000	2177300000	1798900000	1997500000	1575000000	1201000000	1266400000
C9JLV4;O14727-5;O14727-4;O14727;O14727-3;O14727-2;O14727-6;F8VNZ0	Apoptotic protease-activating factor 1	APAF1	100920000	115950000	88333000	87669000	83782000	83224000	77214000	98244000	118210000	98452000	155930000	90538000
I3L2L5;I3L4Q0;C9JLW8;I3L317;I3L3A7	Protein FAM195B	FAM195B	138710000	120460000	127120000	91404000	92152000	116060000	152700000	91222000	0	91460000	106490000	106760000
C9JME2;Q9Y4F1;Q9Y4F1-2;A0A1B0GV68;M0QYB0;H0Y783;M0QXT1;Q9Y4F1-3	FERM, RhoGEF and pleckstrin domain-containing protein 1	FARP1	166070000	164680000	172180000	137810000	139360000	131600000	154270000	179320000	177320000	142150000	133860000	159540000
C9JMH6;P08697;A0A0J9YY65;P08697-2;A0A0G2JPA8;C9JPV4;A0A0J9YWQ3	Alpha-2-antiplasmin	SERPINF2	48205000	39559000	28171000	0	0	0	19886000	20498000	36939000	0	0	0
C9JMV9		ABHD14A-ACY1	0	14442000	16978000	0	0	0	31971000	25249000	42260000	18655000	0	0
C9JMY1;P18065;C9JW52;H7C1H0	Insulin-like growth factor-binding protein 2	IGFBP2	0	0	0	229380000	191700000	229880000	0	0	0	9816200	0	12140000
C9JNE2;Q9Y530;C9JXC3;C9J5P1;H7C5Q1;C9JA90;C9IZY1	O-acetyl-ADP-ribose deacetylase 1	OARD1	459630000	457710000	418470000	344330000	315310000	366790000	344420000	387040000	424460000	369340000	217830000	240090000
C9JQ41;H7C525;Q4VC31;C9JBU9	Coiled-coil domain-containing protein 58	CCDC58	2960700000	2690600000	2841500000	2013900000	2022400000	2038400000	3055000000	3075300000	2891700000	1944400000	1794200000	1981800000
C9JQD4;O43447;O43447-2;H0YEL5;A6NM32	Peptidyl-prolyl cis-trans isomerase;Peptidyl-prolyl cis-trans isomerase H	PPIH	476760000	520600000	441970000	395210000	355080000	294250000	495020000	416520000	460960000	411130000	429320000	419960000
C9JRD2;C9JXB9;P25686-2;P25686;C9J1G2;E7ETU0;C9JX00	DnaJ homolog subfamily B member 2	DNAJB2	0	0	35182000	31594000	42584000	32206000	0	0	0	39505000	34206000	57889000
C9JRZ6;Q9NX63;F8WAR4;A0A286YEX5	MICOS complex subunit MIC19	CHCHD3	1692600000	1567600000	1928100000	2669200000	2339400000	2185200000	1771400000	2065200000	1843000000	2364400000	1711100000	1988700000
C9JS50;Q687X5-2;Q687X5	Metalloreductase STEAP4	STEAP4	0	0	0	120190000	132040000	157330000	0	0	0	0	0	0
H7BYW5;C9JSK5;P31321;K7EKR1	cAMP-dependent protein kinase type I-beta regulatory subunit	PRKAR1B;PRKAR1A	0	7409000	16728000	0	0	0	17729000	17768000	15830000	17249000	0	0
C9JTJ1;Q9Y6R6	Zinc finger protein 780B	ZNF780B	63677000	75774000	36865000	20265000	23479000	20172000	60357000	69429000	89987000	0	0	36393000
C9JUM1;C9JZR7;C9JTX5;F8WCH0		ACTB	13587000	16583000	0	0	0	0	47820000	27710000	46363000	0	0	0
C9JWJ8;Q14938-6;Q14938-5;Q14938-3;K7EJB0;Q14938-2;Q14938-4;Q14938	Nuclear factor 1;Nuclear factor 1 X-type	NFIX	0	0	0	7649200	0	10082000	0	0	8721900	7685100	0	0
C9JXB8;C9JNW5;P83731	60S ribosomal protein L24	RPL24	7366600000	5585200000	7729700000	4591500000	4906600000	4430800000	5125600000	7832300000	6240900000	6310100000	5979600000	5563300000
M0QZQ3;C9JY79;Q9H254-2;Q9H254-4;Q9H254	Spectrin beta chain, non-erythrocytic 4	SPTBN4	0	0	0	0	0	0	0	0	686610	0	0	0
C9JYA1;O15504;O15504-2;B4DT96;O15504-3	Nucleoporin-like protein 2	NUPL2	137150000	172880000	152610000	172930000	158410000	184150000	151050000	152210000	153960000	131320000	117000000	149360000
C9JYM0;O75817	Ribonuclease P protein subunit p20	POP7	78313000	89892000	81463000	74865000	63454000	86595000	85518000	76282000	102460000	87204000	136620000	65918000
C9JYN0;Q16563-2;Q16563;A0A0U1RQT9;H7C4J8	Synaptophysin-like protein 1	SYPL1	152070000	99771000	156480000	158140000	178890000	171180000	116130000	150740000	119160000	124400000	195120000	154430000
C9JYQ9;H0Y8C2;Q6P5R6	60S ribosomal protein L22-like 1	RPL22L1	68636000	69740000	58012000	56843000	0	0	61749000	72462000	61863000	48853000	0	0
J3KS67;C9JYS5;Q96ET8-3;Q9NYZ1;K7ENL4;J3QL63;J3QL47;A0A0A6YYB9;Q96ET8-2;C9JPH1;E5RIS5;I3L376;E5RGC5	Golgi apparatus membrane protein TVP23 homolog;Golgi apparatus membrane protein TVP23 homolog C;Golgi apparatus membrane protein TVP23 homolog B	TVP23B;TVP23C;TVP23C-CDRT4	213290000	190020000	146860000	252990000	206110000	236540000	201550000	189220000	198120000	151210000	176490000	145870000
C9JYY6;F8W775;Q92823-3;Q92823-4;Q92823-6;Q92823-2;Q92823;Q92823-5;A0A087X2B3;C9JH43	Neuronal cell adhesion molecule	NRCAM	0	23327000	34065000	154590000	161150000	60369000	39358000	69991000	69567000	121880000	0	99652000
C9JZ99;F8WD41;Q15166	Serum paraoxonase/lactonase 3	PON3	56604000	35944000	61986000	88267000	80114000	76707000	35082000	52065000	43523000	67682000	114260000	78309000
H7C4M9;C9JZG9;C9JZY6;P62256-2;P62256;C9J8Q9	Ubiquitin-conjugating enzyme E2 H	UBE2H	200080000	214180000	228920000	291460000	318860000	230530000	150310000	175480000	179810000	280720000	307230000	266740000
O60716;C9JZR2;O60716-3;O60716-5;O60716-2;O60716-6;O60716-7;O60716-8;O60716-4;O60716-9;O60716-10;O60716-11;O60716-13;O60716-17;O60716-12;O60716-14;O60716-18;O60716-21;O60716-19;O60716-16;O60716-15;O60716-20;O60716-22;O60716-24;O60716-23;O60716-29;O60716-27;O60716-26;O60716-25;O60716-32;O60716-31;O60716-30;O60716-28;E9PRE2;E9PKY0;H0YC95;E9PKL1	Catenin delta-1	CTNND1	7707000000	7517000000	7081900000	5179700000	5387100000	5347600000	7912400000	8321700000	8447700000	7671500000	7636600000	7669300000
C9K088;P50219-2;P50219	Motor neuron and pancreas homeobox protein 1	MNX1	8123800	9469400	0	0	15414000	0	0	0	7522300	36780000	43185000	0
CON__A2I7N0			275860000	86824000	0	508480000	786510000	1483500000	0	0	0	231080000	453760000	215010000
CON__A2I7N1			0	0	0	61548000	50272000	42002000	0	0	0	28256000	14201000	16386000
CON__A2I7N3			3367900	0	0	1204800000	1144700000	897770000	12548000	10931000	13554000	382430000	288010000	356010000
CON__ENSEMBL:ENSBTAP00000006074			0	0	0	321890000	338430000	319670000	0	0	0	91119000	0	58729000
CON__ENSEMBL:ENSBTAP00000007350			1959600000	1914100000	2122200000	4215900000	4196000000	4107300000	1762200000	1663500000	1797300000	1664600000	2010000000	1684300000
CON__ENSEMBL:ENSBTAP00000013050			0	0	0	28076000	45586000	135230000	0	0	0	23705000	0	0
CON__ENSEMBL:ENSBTAP00000014147			0	0	0	308320000	285380000	211380000	0	0	0	42390000	28217000	54338000
CON__ENSEMBL:ENSBTAP00000016046			18919000	18193000	7204200	930570000	1016000000	898190000	9576700	16200000	0	228190000	364080000	247910000
CON__ENSEMBL:ENSBTAP00000018229			0	0	0	563200000	590010000	418000000	0	0	0	83021000	77090000	140080000
CON__ENSEMBL:ENSBTAP00000018574			15153000	27609000	55251000	1644300000	1530300000	1886800000	21481000	0	41217000	143650000	185110000	161390000
CON__ENSEMBL:ENSBTAP00000023055;D6RAR4;Q04756	Hepatocyte growth factor activator;Hepatocyte growth factor activator short chain;Hepatocyte growth factor activator long chain	HGFAC	0	0	0	27488000	17318000	16236000	0	0	0	0	9910400	0
CON__ENSEMBL:ENSBTAP00000023402			0	0	0	24910000	39958000	27747000	0	0	0	14920000	0	0
CON__ENSEMBL:ENSBTAP00000024146;P20742;P20742-2;F5GXY0			7742600000	8558400000	8460500000	29205000000	27398000000	25914000000	10198000000	10131000000	10330000000	8137500000	10511000000	7233300000
CON__ENSEMBL:ENSBTAP00000024466;CON__ENSEMBL:ENSBTAP00000024462			0	0	0	622110000	588340000	562840000	0	0	0	236240000	300420000	133360000
CON__ENSEMBL:ENSBTAP00000025008;Q9H4B7	Tubulin beta-1 chain	TUBB1	0	0	0	34820000	20711000	26051000	0	0	0	0	0	0
CON__ENSEMBL:ENSBTAP00000031360			0	0	0	0	0	21303000	0	0	0	0	0	0
CON__ENSEMBL:ENSBTAP00000032840			113770000	135430000	110190000	218850000	233990000	196820000	121200000	168750000	172010000	174070000	91198000	117990000
CON__ENSEMBL:ENSBTAP00000033053			0	0	0	36279000	36032000	28829000	0	0	0	0	0	0
CON__ENSEMBL:ENSBTAP00000034412			4469800	7595800	6176000	1684400000	1573100000	622950000	44101000	18676000	31056000	827750000	324390000	789010000
CON__ENSEMBL:ENSBTAP00000037665			77937000	147630000	120810000	570820000	580470000	340370000	147920000	119420000	96538000	118930000	117140000	149010000
CON__ENSEMBL:ENSBTAP00000038329			3199600	0	0	408500000	294360000	419950000	6945900	7489200	6815200	85500000	53711000	49540000
CON__P00735			385120000	246260000	404600000	1271700000	1507300000	1306900000	425870000	373510000	376540000	360860000	464470000	258440000
CON__P00761			16438000000	13388000000	14082000000	34797000000	36713000000	37935000000	8917400000	12813000000	11708000000	13680000000	16372000000	12854000000
CON__P00978			14985000	25506000	11522000	1325700000	1088000000	1345400000	15185000	30264000	35031000	717280000	688520000	265900000
CON__P01030			55403000	60225000	80153000	117020000	135080000	181960000	58660000	71722000	63386000	50747000	57231000	52185000
CON__P01044-1			0	0	0	202010000	231880000	255510000	0	0	0	115450000	120530000	62714000
CON__P01045-1			345480000	267690000	413190000	1528700000	941290000	637810000	0	0	0	283110000	304140000	329140000
CON__P01966;A0A2R8Y7C0			548870000	603630000	603960000	40801000000	42821000000	48104000000	617330000	617810000	769580000	16262000000	18519000000	15883000000
CON__P02070;A0A2R8Y7X9;P69892;P69891;P02100;E9PBW4			0	0	0	438910000	472630000	496760000	0	0	0	111920000	111270000	109320000
CON__P02584			0	0	0	31083000	28252000	22522000	0	0	0	12641000	15789000	11539000
CON__P02672			0	0	0	1451000000	1440100000	1265800000	0	0	0	231880000	294690000	209150000
CON__P02676			0	0	0	0	18476000	0	0	0	0	0	56943000	0
CON__P02768-1;P02768;A0A0C4DGB6;H0YA55;B7WNR0;D6RHD5;A0A087WWT3;C9JKR2;P02768-3;P02768-2;H7C013	Serum albumin	ALB	3325100000	3441200000	3376800000	42705000	15014000	15381000	3936400000	3641700000	4011700000	1758400	1798500	6049400
CON__P02769			8513500000	8705700000	7412300000	390550000000	337970000000	309770000000	10806000000	10688000000	11521000000	172570000000	177630000000	141650000000
CON__P02777			13943000	48154000	15271000	684400000	846430000	783100000	43848000	38094000	36190000	151140000	258350000	234380000
CON__P04258;P02461-2;P02461	Collagen alpha-1(III) chain	COL3A1	0	0	0	0	9104800	0	0	0	0	0	0	0
CON__P05784;CON__REFSEQ:XP_986630;CON__O76014;CON__O76013;CON__O76015;CON__A2AB72;CON__Q14525;CON__Q14532;CON__Q15323;CON__A2A5Y0;CON__Q9UE12;Q14532;O76013-2;O76014;O76015;O76013;Q15323;Q14525			1560100000	1277000000	929410000	8337300000	11097000000	14611000000	6443500000	2719700000	2272400000	19300000000	20516000000	20082000000
CON__P05787;P05787;P05787-2;F8VUG2;F8W1U3;CON__H-INV:HIT000292931;F8VP67;CON__Q9H552;F8VQY3;CON__H-INV:HIT000016045;F8W0C6;CON__Q9DCV7;CON__P08729;CON__Q3KNV1;P08729;CON__Q9NSB2;CON__Q6ISB0;Q9NSB2;Q8IWY7;P14136-2;K7EJU1;A0A1X7SCE1;P14136-3;A0A1X7SBR3;P14136;A0A1W2PR46;K7EMP8;H0YIB2;U3KPR1;CON__Q7RTT2;CON__Q8N1N4-2;Q8N1N4;Q8N1N4-2;K7EKH9;K7ELP4;B4DIR1;H0YHD9;Q6KB66-2;Q6KB66-3;CON__Q6KB66-1;Q6KB66;…	Keratin, type II cytoskeletal 8	KRT8	88990000000	73080000000	86465000000	135110000000	137500000000	114990000000	94150000000	101200000000	89621000000	152970000000	151630000000	141190000000
CON__P06868;P00747;P08519			1745600	19675000	2750700	10737000000	11014000000	9308100000	42009000	0	13489000	3322800000	1840900000	2647200000
CON__P07224			0	30312000	0	952990000	644960000	615670000	0	0	0	73473000	81237000	84597000
CON__P08727;P08727;K7EMS3;C9JM50;K7EPJ9;P19012-2;A8MT21;C9JTG5;CON__Q8N1A0;CON__Q99456;Q8N1A0-2;Q8N1A0;Q99456	Keratin, type I cytoskeletal 19	KRT19	2459600000	2434100000	2511700000	1566100000	1592600000	1507200000	5191800000	4846500000	5176400000	5799100000	6000700000	5230600000
CON__P08730-1			0	0	0	0	0	0	421060000	8365000	390390000	0	0	0
CON__P12763			2071100000	1954300000	1912700000	134340000000	113670000000	102310000000	2750000000	3165600000	3147900000	58294000000	55448000000	44125000000
CON__P13645;P13645;CON__P02535-1;CON__Q148H6;CON__Q7Z3Y7;Q7Z3Y7;CON__Q7Z3Z0;CON__Q7Z3Y8;Q7Z3Z0;Q7Z3Y8	Keratin, type I cytoskeletal 10	KRT10	9475500000	31685000	39680000	614500000	37463000	295720000	21853000	0	0	84609000	170140000	20114000
CON__P15497			215550000	208210000	169600000	16829000000	17000000000	17389000000	242180000	127780000	289920000	6762000000	6389600000	5725200000
CON__P15636			24449000000	21225000000	18398000000	75911000000	54570000000	64399000000	11822000000	17749000000	18390000000	19675000000	30142000000	15002000000
CON__P17690			388080000	394020000	346740000	4253200000	4187900000	4341300000	782540000	775850000	745250000	2093900000	2262100000	1671800000
CON__P17697			0	0	0	420600000	455870000	449290000	0	0	0	164850000	148330000	156450000
CON__P28800			4477700	5382200	7708900	2539400000	1739400000	3230700000	4440500	2638500	2556900	464500000	190490000	115260000
CON__P34955			1686200000	1803200000	1663900000	86814000000	74058000000	66307000000	2099700000	2098900000	2355500000	37205000000	32060000000	29919000000
P35527;CON__P35527;K7EQQ3	Keratin, type I cytoskeletal 9	KRT9	0	0	0	0	281240000	386370000	0	8563100	0	0	0	0
CON__P35908v2;P35908;CON__P35908;H0YID6;CON__Q9R0H5	Keratin, type II cytoskeletal 2 epidermal	KRT2	8119200000	12083000	7028500	196870000	101310000	559620000	12655000	33798000	6881600	35774000	17154000	25137000
CON__P41361;Q8TCE1;P01008			42114000	7094300	76897000	2013200000	2525300000	2136100000	59367000	85445000	84138000	877860000	657650000	569460000
CON__P50448			4570700	4885700	5010900	807230000	717570000	508380000	8259500	6538000	4922600	110790000	174090000	151050000
CON__P81644			1671700000	556140000	403170000	10039000000	9826400000	10690000000	508580000	671930000	812150000	8562300000	6969800000	6294500000
CON__Q03247			0	72171000	0	320290000	255300000	261860000	89787000	71146000	66926000	124100000	99460000	16241000
CON__Q05443;P51884			0	0	0	109220000	152770000	383750000	0	0	0	42533000	25436000	21816000
CON__Q05B55			13636000	0	0	403030000	291420000	396390000	0	0	0	43727000	0	89199000
CON__Q0IIK2;CON__Q29443			1427800000	1426000000	1342100000	46788000000	40498000000	38840000000	1696000000	1576200000	1659900000	15472000000	14725000000	12341000000
CON__Q0V8M9;A0A087WW43;E7ET33;Q06033-2;Q06033			336990000	402630000	301400000	2631200000	2035300000	1936100000	161020000	222990000	256070000	848920000	505360000	582450000
CON__Q0VCM5;H7C0N0;P19827-3;P19827-2;P19827			0	0	0	587590000	467330000	281600000	0	0	21421000	17406000	17083000	40494000
CON__Q1A7A4			0	0	0	102100000	133480000	101380000	0	0	0	56165000	0	0
CON__Q1RMK2			0	0	0	207700000	191760000	215570000	65598000	63217000	0	145430000	96740000	230670000
CON__Q1RMN8			0	26616000	25275000	266510000	244090000	302810000	0	0	0	56610000	21314000	37156000
CON__Q28065			0	3474900	715750	1037800000	1100300000	1242200000	20553000	9583200	43116000	575430000	523670000	451090000
CON__Q28085			0	0	0	684360000	752230000	577760000	0	0	0	51771000	0	75880000
CON__Q28107			0	0	0	436220000	518670000	460140000	0	0	0	126680000	44909000	135520000
CON__Q28194			0	0	0	124980000	93501000	93306000	0	0	0	42431000	55892000	70316000
CON__Q29RQ1			0	15052000	9382600	245960000	223440000	333220000	0	0	20625000	32842000	32216000	0
CON__Q2HJF0			0	12679000	8730400	15191000	10511000	13305000	0	0	0	0	0	0
CON__Q2KIF2			0	0	0	103300000	145940000	99327000	0	0	0	41267000	35918000	25928000
CON__Q2KIS7;E9PHK0;P05452	Tetranectin	CLEC3B	0	0	0	622200000	548520000	539000000	2331200	1633200	0	61872000	123300000	188310000
CON__Q2KIT0			0	0	0	38428000	42336000	39472000	0	0	0	0	0	0
CON__Q2KJ62			3484500	1417900	10173000	2899100000	6381000000	5384500000	10152000	8967800	0	1010900000	1195800000	1012600000
CON__Q2KJC7			0	5918800	0	498030000	467830000	546390000	0	0	0	34043000	8974100	6176200
CON__Q2KJF1;M0R009;P04217-2;P04217			0	0	0	4523500000	3182700000	2175600000	47559000	0	8116900	1359100000	1281900000	920190000
CON__Q2TBQ1			0	0	0	165080000	162330000	197600000	0	0	0	25298000	44112000	22329000
CON__Q2UVX4			91963000	59520000	97148000	12708000000	10655000000	7560000000	101460000	81010000	96726000	3389000000	4597000000	2610600000
CON__Q32PI4			0	0	0	264240000	241230000	432020000	14156000	2622300	10624000	69041000	87015000	73690000
CON__Q32PJ2			15178000	23693000	0	136510000	88447000	116110000	0	0	0	0	0	15386000
CON__Q3KUS7			36402000	41308000	0	2102800000	2151900000	2026500000	36260000	64454000	41059000	217670000	281960000	204520000
CON__Q3MHH8;P19961-2;P19961;P04746;P04745;C9JWK7;C9J2Z5;Q5T084;H7BZQ8;Q5T085;P04746-2	Alpha-amylase 2B;Pancreatic alpha-amylase;Alpha-amylase 1	AMY2B;AMY2A;AMY1A	0	0	0	82355000	73916000	82784000	0	0	0	0	0	0
CON__Q3MHN2;P02748			0	0	0	173810000	163730000	82521000	0	0	0	117710000	0	57803000
CON__Q3MHN5			142870000	206690000	140360000	12688000000	11695000000	12215000000	241570000	215600000	159820000	4329700000	4762400000	4001700000
CON__Q3SX09;A0A2R8Y7R2;E9PFT6;P68871;P02042;A8MUF7;F8W6P5			552730000	388580000	504780000	48474000000	50321000000	48150000000	599330000	513480000	622590000	14830000000	16991000000	17129000000
CON__Q3SX14			895640000	922000000	872030000	4052800000	4174900000	4044000000	632460000	696230000	760170000	1902800000	1672100000	1595400000
CON__Q3SZ57			42099000	42026000	39134000	17378000000	15741000000	13529000000	57329000	123580000	110240000	5702500000	6925400000	6230000000
CON__Q3SZH5			11217000	11590000	0	3942400000	3692700000	3980200000	0	0	0	346100000	520400000	367130000
CON__Q3SZR3			6700200	13085000	20564000	4984000000	5716900000	4118100000	36584000	56784000	32194000	1773300000	1550000000	1521300000
CON__Q3SZV7			1035900000	1116100000	919710000	2160300000	1873800000	1909300000	654460000	596490000	474170000	561150000	634940000	692230000
CON__Q3T052;B7ZKJ8;Q14624-4;Q14624-3;Q14624-2;Q14624;H7C0L5			8552500	6721300	12215000	9979800000	9017400000	11382000000	17103000	8458800	21512000	4585900000	6145400000	5610700000
CON__Q3Y5Z3			40721000	53884000	48982000	911270000	276400000	553760000	66680000	60475000	50100000	82239000	57717000	64267000
CON__Q3ZBD7			234460000	318640000	327380000	179710000	222200000	221450000	299030000	247750000	316470000	291700000	358950000	292050000
CON__Q3ZBS7			7479500	15139000	8101600	1372900000	1570800000	1951400000	15681000	7700000	7994400	449370000	737430000	433130000
CON__Q58D62			67137000	50014000	31220000	11332000000	9534400000	9622000000	84937000	47591000	57755000	2984500000	3555100000	3061700000
CON__Q922U2;CON__Q5XQN5			0	0	0	0	0	0	0	0	0	0	3054700	0
CON__Q6T181			0	0	0	19348000	21179000	21020000	0	0	0	0	0	0
CON__Q7RTS7;F8W1S1;Q7RTS7;CON__Q14CN4-1;CON__Q6IME9;CON__Q3SY84;CON__Q32MB2;Q86Y46-2;Q14CN4-3;Q14CN4-2;Q14CN4;Q3SY84;Q86Y46;H0YIG3	Keratin, type II cytoskeletal 74;Keratin, type II cytoskeletal 73;Keratin, type II cytoskeletal 72;Keratin, type II cytoskeletal 71	KRT74;KRT73;KRT72;KRT71	18443000	0	17858000	9011000	0	0	0	0	25829000	15904000	13811000	0
CON__Q7Z794;Q7Z794	Keratin, type II cytoskeletal 1b	KRT77	18174000	0	0	0	0	0	0	0	0	0	0	0
CON__Q8BGZ7;CON__P50446			12473000	0	0	0	0	0	0	0	0	0	0	0
CON__Q95121;I3L425;I3L4F9;I3L107;I3L3Z3;I3L1U4;I3L2R7			107750000	27370000	128610000	1325400000	1387700000	2175100000	0	8860600	9845900	351530000	474890000	114240000
CON__Q9C075;Q9C075;Q9C075-2;J3QR55;K7EPI0;Q9UFN7	Keratin, type I cytoskeletal 23	KRT23	274050000	241460000	233770000	287140000	277720000	284180000	340730000	275430000	269070000	314380000	312750000	329190000
CON__Q9N2I2			0	0	0	169680000	212440000	205750000	0	0	29392000	28818000	26990000	20893000
CON__Q9QWL7;F5GWP8;CON__Q04695;Q04695;CON__Q6IFX2;A0A3B3IS58;CON__Q61782;CON__P35900;CON__Q9D312;P35900	Keratin, type I cytoskeletal 17	KRT17	0	0	0	0	0	0	0	0	0	12950000	17393000	0
CON__Q9TRI1			285690000	282440000	266670000	10757000000	8902600000	10063000000	368150000	431980000	393710000	2604900000	2808800000	2667000000
CON__Q9TT36;P05543			5979100	4217600	0	683040000	609820000	599140000	3286100	5104900	9865400	131250000	58568000	126950000
CON__Q9TTE1			21871000	4191600	0	5149200000	4945900000	4505700000	0	38829000	0	876940000	1006900000	1644300000
CON__REFSEQ:XP_001252647			9476800	2118100	0	3796800000	4238500000	4429800000	3509000	6558700	9584200	949150000	976510000	767340000
CON__REFSEQ:XP_092267			0	0	0	0	0	0	0	0	0	0	262480000	0
CON__REFSEQ:XP_585019			34228000	0	0	652310000	1014400000	593010000	0	36912000	0	113470000	100290000	49745000
D3DQ30;Q5SRH9-5;Q5SRH9-6;Q5SRH9-4;Q5SRH9;A0A0A0MRQ0;A0A0A0MSH8;E9PAZ4;A0A0A0MSW9;Q5SRH9-2;Q5SRH9-3;E9PHX9;U5GXS1	Tetratricopeptide repeat protein 39A	TTC39A	10989000	13492000	14001000	24617000	28532000	62435000	34497000	36319000	35211000	10367000	23405000	51643000
F6U1T9;D3YTA9;P63098;H7BYZ3;A0A1B0GUC7;A0A494C014;Q96LZ3	Calcineurin subunit B type 1	PPP3R1	288700000	305470000	304810000	306340000	341390000	330530000	308130000	298960000	291410000	381810000	484030000	379020000
D3YTB1;F8W727;P62910;D3YTI8	60S ribosomal protein L32	RPL32	8372900000	8181200000	7565400000	5204600000	4265900000	3917400000	7999100000	7859100000	9075200000	6773300000	4306100000	5847400000
D3YTB5;P51617-4;P51617-2;P51617-3;P51617;H7C224;H7C2I6;F8WAB6	Interleukin-1 receptor-associated kinase 1	IRAK1	0	0	0	18354000	20470000	14940000	0	0	0	24622000	0	0
D3YTC1;Q9NZE8-2;Q9NZE8	39S ribosomal protein L35, mitochondrial	MRPL35	68966000	64802000	57783000	34537000	36920000	21406000	61880000	65635000	87630000	39545000	27493000	33581000
D3YTC9;Q6NXT1;B5MCX7;H7C3L3;C9JU48;F8WB76;H7BZV9;Q6NXT1-2	Ankyrin repeat domain-containing protein 54	ANKRD54	166460000	131530000	155560000	142800000	166650000	43436000	132140000	110130000	156390000	119910000	108420000	90164000
D3YTF2		ZNF799	0	0	0	0	0	0	0	0	19844000	0	0	0
D4Q8H0;Q9NYL2-2;Q9NYL2-3;C9J3F7	Mitogen-activated protein kinase kinase kinase MLT	pk;ZAK	14240000	13899000	0	15550000	17913000	14827000	0	0	0	0	18000000	0
Q13557-8;Q13557-11;Q13557-6;Q13557;Q13557-10;Q13557-12;D6R938;E9PF82;Q13557-4;Q13557-3;Q13557-5;Q13557-9;E9PBG7;H0Y9J2;H0Y9C2;Q9UQM7-2;Q9UQM7;E7EQE4;E9PBE8;E7ETC9;D6RFJ0;E7ERS6;D6RHX9	Calcium/calmodulin-dependent protein kinase type II subunit delta	CAMK2D	3333000000	3489100000	3359500000	3306200000	3357900000	3363600000	3934100000	3722000000	3756500000	4043500000	3883200000	4145000000
D6R992;Q01201	Transcription factor RelB	RELB	0	0	0	83530000	261400000	153890000	47635000	10437000	0	36659000	54381000	58612000
D6R9G1;P50613;D6RAD4;D6REC6	Cyclin-dependent kinase 7	CDK7	244690000	243680000	252180000	283740000	308710000	279700000	310360000	260770000	269450000	242800000	264730000	233750000
D6R9N5;D6RB08;K4DIA5;P14316-2;P14316	Interferon regulatory factor 2	IRF2	10403000	12405000	12594000	0	0	0	0	0	0	0	0	0
D6R9P3;D6RD18;D6RBZ0;Q99729-3;Q99729-2;Q99729-4;Q99729	Heterogeneous nuclear ribonucleoprotein A/B	HNRNPAB	7453100000	9166600000	8434700000	8392900000	8323800000	7294500000	10459000000	10053000000	10142000000	8651100000	12290000000	10004000000
D6R9P6;Q8NEZ3-2;Q8NEZ3	WD repeat-containing protein 19	WDR19	12363000	9042000	0	8575600	0	0	9377400	0	17766000	8921400	0	0
D6RER8;E7ESU6;D6RG31;D6RHF5;D6R9Q7;Q8NBW4-2;Q8NBW4-4;Q8NBW4-3;Q8NBW4	Sodium-coupled neutral amino acid transporter 9	SLC38A9	0	0	31777000	0	24907000	0	0	15775000	0	0	0	17908000
D6RAD7;D6RAR9;D6RC36;D6R9S0;D6RBN2;D6RBJ9;P32321;P32321-2	Deoxycytidylate deaminase	DCTD	0	0	0	0	0	0	0	0	0	0	0	0
D6RDM3;D6R9S7;D6RHE3;D6RDB0;Q96GZ6-8;Q96GZ6-6;Q96GZ6-7;Q96GZ6-5;Q96GZ6-9;Q96GZ6-2;Q96GZ6	Solute carrier family 41 member 3	SLC41A3	0	0	21950000	0	39050000	32231000	0	28975000	0	0	0	21781000
D6RDB1;D6RGZ0;D6R9U3;Q96QK8	Small integral membrane protein 14	SMIM14	0	0	0	0	0	18949000	16346000	19397000	14350000	20101000	0	0
D6R9Z7;P15954	Cytochrome c oxidase subunit 7C, mitochondrial	COX7C	780630000	736810000	825880000	365890000	432070000	497340000	748350000	819290000	828490000	504340000	436120000	437170000
D6RIZ4;D6RA47;D6RE79;Q14728;D6R9N3	Major facilitator superfamily domain-containing protein 10	MFSD10	183050000	85450000	169280000	250830000	258230000	273580000	105520000	143230000	82203000	340820000	261910000	339070000
O95359;O95359-2;O95359-1;O95359-5;O95359-6;O95359-3;Q4VXL8;D6RAA5;E7EMZ9;Q4VXL4;E9PBC6;H0Y911;A0A0U1RRM9;H0Y9C3;E9PGB3;H0Y9Y7;H0YA73	Transforming acidic coiled-coil-containing protein 2	TACC2	142640000	146580000	116990000	168390000	158880000	196420000	134250000	151170000	167890000	195080000	185910000	167520000
D6RAF2;Q6PIY7-2;Q6PIY7	Poly(A) RNA polymerase GLD2	PAPD4	27733000	16837000	20976000	19738000	11641000	13923000	19438000	0	21706000	16581000	0	26539000
D6RAG4;Q9NYD6	Homeobox protein Hox-C10	HOXC10	0	0	18614000	0	0	0	0	0	0	0	0	0
D6RAJ6;Q9UKT5-2;Q9UKT5;D6REP2;D6RAU6	F-box only protein 4	FBXO4	45361000	42686000	58325000	33098000	40792000	46471000	50596000	36906000	37660000	38318000	0	46802000
D6RB01;Q9Y6X4;D6RC41;D6R953	Soluble lamin-associated protein of 75 kDa	FAM169A	188920000	198820000	232410000	429390000	490740000	488200000	218150000	165800000	166100000	238080000	281760000	247840000
D6RB81;Q9UHK6;Q9UHK6-5;V9GZ45;V9GYP4;V9GYU9;Q9UHK6-4;Q9UHK6-2	Alpha-methylacyl-CoA racemase	AMACR	349470000	322760000	403680000	152070000	178270000	188890000	362360000	486890000	456550000	170180000	130210000	106480000
D6RBC1;D6RDG4;Q8NA72-2;Q8NA72-3;Q8NA72	Centrosomal protein POC5	POC5	0	0	0	0	12100000	10714000	0	0	0	0	0	0
D6RCP9;D6RFG8;P27707;D6RG38	Deoxycytidine kinase	DCK	115530000	132050000	115810000	108580000	135450000	117240000	124010000	75877000	103430000	126570000	145190000	115730000
E7EPK0;E9PDJ9;H0Y8P3;D6RD46;G5EA03;Q9UPQ0-9;Q9UPQ0-8;Q9UPQ0-6;Q9UPQ0-5;Q9UPQ0-10;Q9UPQ0-2;Q9UPQ0-4;Q9UPQ0;Q9UPQ0-3	LIM and calponin homology domains-containing protein 1	LIMCH1	0	570410000	440560000	0	0	0	0	0	0	0	0	0
D6RDH4;Q9Y3D8-2;Q9Y3D8;A0A087WVD7	Adenylate kinase isoenzyme 6	TAF9;AK6	87416000	99397000	110490000	67228000	68036000	71623000	123710000	103430000	115940000	130850000	205740000	124010000
D6REA0;O75879;D6RDU9;H0Y9W6	Glutamyl-tRNA(Gln) amidotransferase subunit B, mitochondrial	PET112;GATB	215030000	173210000	152420000	129610000	112740000	125330000	120460000	219520000	227950000	167040000	135080000	175090000
D6REA1;Q9H173;A0RZB6;D6R940;D6RG16;D6RBP7;D6RAI3;D6RIU8	Nucleotide exchange factor SIL1	SIL1	82238000	80692000	98008000	149030000	145230000	153360000	89340000	87104000	78243000	106740000	109970000	120320000
D6REL5;Q6UWZ7-2;Q6UWZ7;A0A087WZ78;A0A087WWJ9	BRCA1-A complex subunit Abraxas	FAM175A	27822000	36805000	44041000	42646000	0	24343000	46584000	33633000	40966000	33183000	0	46374000
D6RGI3;D6RER5;Q9NVA2;Q9NVA2-2;D6RDU5;H0Y961;D6RDP1;D6R9Y6;H0Y9G8	Septin-11	2011-09-01	4763400000	4797800000	4843400000	4202800000	4210000000	4185700000	4897500000	5045400000	5539300000	4699100000	4643000000	4448000000
D6REX3;O94979;O94979-2;O94979-9;O94979-3;O94979-4;O94979-10;O94979-6;D6RHZ5;H7BXG7;O94979-7;O94979-5;H0YAB3;H0Y8V7;H0Y9K1;H0Y9T9;H0YAF5;D6RE64;H0Y9V3;D6RCQ9;D6RHE8;D6RBT0	Protein transport protein Sec31A	SEC31A	11488000000	11890000000	10145000000	8081400000	8469200000	8980000000	11065000000	10761000000	11472000000	7720200000	8661300000	7927300000
D6RF35;P02774;P02774-3;D6RBJ7;P02774-2;D6RF20	Vitamin D-binding protein	GC	872630000	890360000	522000000	0	0	8003700	1030200000	1096600000	845470000	0	0	16567000
D6RF44		HNRNPD	0	0	0	0	23399000	30519000	0	0	0	167610000	111820000	0
Q9P2W9;D6RF48;D6RC71	Syntaxin-18	STX18	275530000	167690000	289770000	327190000	309460000	375440000	221230000	284110000	217950000	298950000	394450000	376440000
D6RGY8;D6RFI3;E7EQR8;Q9GZM5;H0Y9A1	Protein YIPF3;Protein YIPF3, 36 kDa form III	YIPF3	161980000	158040000	144050000	119400000	146340000	139400000	152250000	133360000	138840000	163410000	135730000	189570000
D6RGG3;Q99715-4;Q99715;A0A087X0A8;Q99715-2;H0Y5N9	Collagen alpha-1(XII) chain	COL12A1	204090000	169460000	205160000	148580000	120460000	136350000	240280000	202990000	223510000	193240000	181960000	195470000
D6RGJ2;Q8NFZ5-2;Q8NFZ5	TNFAIP3-interacting protein 2	TNIP2	35372000	32564000	25464000	17906000	23947000	29841000	30953000	39652000	41655000	14592000	0	22516000
D6RIY1;D6RGK3;D6RIV9;D6RIE8;Q16594;D6RHW1	Transcription initiation factor TFIID subunit 9	TAF9	0	0	0	0	0	0	0	0	0	16252000	0	0
D6RGX2;Q9NUQ7;H0YA18;D6RB53;D6RA67	Ufm1-specific protease 2	UFSP2	20422000	21689000	22922000	41016000	25215000	33494000	28743000	24471000	21451000	23369000	44270000	27004000
H0YAK9;D6RH31;Q6UXI9;Q6UXI9-6;Q6UXI9-3;Q6UXI9-2;Q6UXI9-5;Q6UXI9-4;H0Y8M1	Nephronectin	NPNT	25405000	39408000	42148000	7356900	8307900	6345300	24190000	17489000	18153000	16431000	6057100	11892000
D6RJF0;D6RHD3;Q9BS16	Centromere protein K	CENPK	25240000	24896000	23173000	0	0	18796000	24158000	24604000	19717000	22191000	0	21878000
D6RHY7;O60337-5;O60337	E3 ubiquitin-protein ligase MARCH6	2006-03-01	0	0	0	0	0	0	0	0	0	0	34277000	39883000
O14810;D6RI11;D6RAG3	Complexin-1	CPLX1	57184000	71027000	66814000	0	15511000	0	90787000	87984000	89731000	29482000	26286000	22695000
D6RIY6;Q06265;Q06265-2;D6R905;Q06265-3;Q06265-4;H0Y9L5;D6RA17;D6RAP4	Exosome complex component RRP45	EXOSC9	270120000	297080000	269310000	230460000	225790000	215870000	308420000	269000000	273930000	251260000	311830000	265560000
D6RJ07;Q9UL40;Q9UL40-3;Q9UL40-2;B7Z6B6;B7Z6Q2;B7Z4J8;B7Z4N4	Zinc finger protein 346	ZNF346	118150000	116790000	134220000	234000000	193410000	257600000	131290000	175970000	169320000	284110000	270430000	345700000
D6RJ90;Q9Y6G5;H0Y9N4;D6RC04	COMM domain-containing protein 10	COMMD10	70696000	60098000	57876000	34074000	34644000	17186000	50865000	53816000	50098000	48244000	43786000	39380000
D6RJG9;Q9Y5W7-2;Q9Y5W7-3;Q9Y5W7-4;Q9Y5W7;D6RDH9;Q5JRQ0	Sorting nexin-14	SNX14	25860000	24123000	20623000	22292000	24284000	22183000	17042000	25269000	20217000	24634000	29973000	25177000
dCas9-VP64-blast			9194300000	7863100000	9959200000	22638000000	22262000000	21466000000	8844300000	10917000000	8953400000	24114000000	25556000000	25924000000
E2QRD4;Q6ZRQ5;H9KVD7;H9KVD8;H0YAJ2	Protein MMS22-like	MMS22L	10261000	14225000	12725000	0	5349600	0	11426000	12346000	12864000	0	0	0
E3W994;J3KR49;A0A0U1RQI6;O75122;B3KR06;E7ENG2;O75122-2;H7C5M8;D6RBU8;C9J668;H7C4X8;H7C4I5;H7C4M5	CLIP-associating protein 2	CLASP2	30574000	25584000	30938000	30946000	28595000	48776000	32951000	38003000	32506000	35687000	32350000	34506000
E9PM53;E5KP25;Q9UIF7-6;Q9UIF7-5;Q9UIF7-4;Q9UIF7-3;Q9UIF7-2;Q9UIF7;H0YCY5;Q5T418;E9PNY0;Q5T413	A/G-specific adenine DNA glycosylase	MUTYH	52729000	28255000	44134000	32743000	24124000	33775000	26930000	28805000	34679000	32055000	0	32974000
E5RG17;Q6P1N9;Q6P1N9-2;G5EA19;U3KQS5;E5RGF2;A0A0D9SGD3;H0YBX2;E5RK70;E5RG62;E5RID7;E5RI69;E5RJY6	Putative deoxyribonuclease TATDN1	TATDN1	344250000	330200000	326620000	392930000	364430000	330680000	385310000	376250000	413550000	430680000	490780000	383930000
E5RG64;E5RI40;E5RHG5;E7EW39;Q7Z2H8-4;Q7Z2H8-3;Q7Z2H8	Proton-coupled amino acid transporter 1	SLC36A1	0	0	0	0	0	0	22411000	21446000	0	0	0	0
E5RGQ3;Q9H446-2;Q9H446;E5RJE3;E5RGS5	RWD domain-containing protein 1	RWDD1	147080000	155780000	137800000	126910000	146990000	115810000	130500000	141460000	149320000	183900000	0	133290000
E5RGS2;Q9H6H4;Q9H6H4-2	Receptor expression-enhancing protein;Receptor expression-enhancing protein 4	REEP4	154360000	117090000	187170000	124830000	122760000	99512000	129910000	288290000	133060000	134300000	0	167780000
E5RGT2;Q96MH6-2;Q96MH6;H0YC64;E5RJN2;E5RHU1;E5RJI9;H0YAY9;Q49A68;H0YAX4;E5RJ96	Transmembrane protein 68	TMEM68	47556000	33479000	89817000	127930000	149310000	125040000	30976000	60131000	28079000	116740000	65055000	70733000
E5RGX5;Q93045;Q93045-2;E5RIR6;E7EVN3;Q9H169-3;Q9H169;Q9H169-4;Q9H169-2	Stathmin;Stathmin-2	STMN2	436680000	398650000	288130000	60664000	49075000	41654000	328140000	254160000	315230000	128120000	96553000	120570000
E5RHW4;O94905;E5RJ09;O94905-2;O94905-3	Erlin-2	ERLIN2	4362800000	4438200000	4767800000	6021500000	5959400000	6203100000	4098600000	4314200000	4273700000	5545200000	5170800000	5385300000
E5RI98		NPM1	0	0	0	0	4230400	4920800	6240400	7107900	4292700	0	0	5338500
E5RIL2;Q9UFF9-3;Q9UFF9;B7Z9U0;Q9UFF9-2;E5RHL9;E5RJC5;E5RHP3;E5RGE4	CCR4-NOT transcription complex subunit 8	CNOT8	21484000	52438000	18969000	30170000	25508000	17552000	23213000	25540000	30873000	27437000	0	0
O00244;E5RIM7;E5RGN3	Copper transport protein ATOX1	ATOX1	944270000	1298400000	1217700000	989680000	953780000	1033600000	812330000	993640000	992920000	1056200000	1099500000	1065500000
E5RIQ5;Q9BX73-2;Q9BX73	TM2 domain-containing protein 2	TM2D2	0	0	32413000	42247000	58269000	53674000	0	22338000	0	27862000	55216000	40796000
E5RIW3;E5RJD8;O75347;E5RHG6;O75347-2;E5RIX8;A0A494C144	Tubulin-specific chaperone A	TBCA	2390200000	2994400000	2157600000	2484300000	2088300000	1892800000	2153900000	2307800000	2770700000	2400400000	2159800000	2285500000
E5RIW9;P28328	Peroxisome biogenesis factor 2	PEX2	16769000	30258000	17071000	23208000	218640000	155550000	0	20627000	0	22768000	17676000	19202000
E5RJ52;P53677	AP-3 complex subunit mu-2	AP3M2	20904000	21244000	22112000	23873000	20232000	0	15294000	18690000	15316000	20770000	0	26453000
E5RK69;H0YC77	Annexin	ANXA6	75010000	65970000	84410000	93951000	106330000	121210000	68262000	69032000	54365000	0	0	64541000
E7EM64;Q7L5N1	COP9 signalosome complex subunit 6	COPS6	1687100000	1618300000	1821600000	1760600000	1789200000	1833200000	1830100000	1806300000	1737000000	1609400000	1839800000	1566200000
E7EMA9;Q32M88;Q32M88-2;H0YCL6	Acid trehalase-like protein 1	ATHL1	36756000	26766000	32885000	81898000	80621000	89895000	0	37216000	35645000	55837000	108350000	94824000
E7EMN6;P41236;Q6NXS1;E7EUI7	Protein phosphatase inhibitor 2;Protein phosphatase inhibitor 2-like protein 3	PPP1R2;PPP1R2P3	667470000	740120000	718360000	701760000	700050000	690310000	621080000	758160000	745250000	700760000	596610000	669070000
E7EMP6;Q96FZ2;D6RGK7;D6R9T3;D6RAZ3;D6RAI0	Embryonic stem cell-specific 5-hydroxymethylcytosine-binding protein	HMCES	107090000	99611000	105500000	46633000	95840000	46238000	87312000	84588000	85878000	36972000	0	51154000
J3KMY5;G3V3E8;E7EMS2;G3V3D1;P61916;H0YIZ1;G3V2V8;P61916-2	Epididymal secretory protein E1	NPC2	1200700000	1226700000	1128600000	626620000	523430000	551170000	1348900000	1171500000	1134700000	704840000	548990000	697510000
E7EN19;O95819-6;E7ENQ1;H7C360;O95819;G3XAA2;G5E948;A0A0D9SEY1;E7EX83;H7C0P6;H7C3Z6;E7ETN6	Mitogen-activated protein kinase kinase kinase kinase 4	MAP4K4	759130000	697850000	700470000	540280000	529000000	540350000	840580000	788580000	880090000	623180000	653550000	572960000
P52747;P52747-3;P52747-2;E7EN86;E9PMY8;C9JTC5;E9PJF2;E9PS81;E9PLN4;C9JRS3;E9PPB0;E9PLS7;C9JCG1;P36508-2;E7EX64;P36508;C9J2G7	Zinc finger protein 143	ZNF143	82946000	94298000	85460000	82929000	88832000	101260000	95040000	103250000	89902000	79197000	82278000	79361000
E9PGW7;Q5T8T7;E7EN96;Q5T8T8;Q15528-2;Q15528	Mediator of RNA polymerase II transcription subunit 22	MED22	24355000	25217000	19204000	18917000	21075000	27567000	23055000	13982000	19388000	23266000	0	28882000
E7END6;P04070;P04070-2;H7BYX9	Vitamin K-dependent protein C;Vitamin K-dependent protein C light chain;Vitamin K-dependent protein C heavy chain;Activation peptide	PROC	34750000	36242000	36382000	0	0	0	41599000	35689000	36019000	0	0	0
E7ENI6;C9IZC7;F8WET5;Q6LCT9;C9J8Y3;C9J3Y4;B9ZVM7;Q6LCR0		ICA1;ICAp69	42909000	44073000	42452000	44345000	23254000	36456000	47029000	44594000	48943000	65210000	0	27956000
E7EPB3;P50914	60S ribosomal protein L14	RPL14	6450400000	4163200000	6674900000	6153800000	6513000000	5952100000	2982200000	6007700000	4496900000	6037400000	6190900000	4265600000
E7EPC8;Q9UQB3-2;Q9UQB3;D6R9A8;B4DRK2	Catenin delta-2	CTNND2	3757600	4578400	3620600	0	0	0	4589300	4224600	5807800	0	0	0
E7EPI0;Q9P2D0;Q9P2D0-2;E9PDR5;D6R9F4;H0Y9N7;Q9P2D0-3	Inhibitor of Bruton tyrosine kinase	IBTK	102640000	89913000	88184000	85484000	77991000	93361000	122970000	113270000	103950000	181050000	70051000	105510000
E7ES33;E7EPK1;Q16181-2;Q16181;G3V1Q4;A0A0U1RRE1;A0A0U1RRH9;Q5JXL7;A0A0U1RRM2;A0A0U1RRD1;Q6ZU15	Septin-7	2007-09-01	4986600000	5055800000	5356000000	4688900000	5018700000	4837200000	5423300000	5315600000	5208800000	4193300000	4311900000	4496400000
E7EPM6;P33121-2;P33121;P33121-3;D6RER0;B7Z3Z9;H0Y9Z9;D6RG07;H0Y9U7	Long-chain-fatty-acid--CoA ligase 1	ACSL1	383200000	352980000	441350000	485960000	727020000	507580000	534380000	531610000	550320000	547350000	136100000	504260000
E7EPN6;P55347-2;P55347;Q96KN3-2;Q96KN3	Homeobox protein PKNOX1;Homeobox protein PKNOX2	PKNOX1;PKNOX2	36865000	38080000	58115000	37848000	37793000	31264000	52523000	67194000	62966000	80123000	66191000	41459000
E7EPN9;Q9Y520-4;Q9Y520-5;Q9Y520;Q9Y520-7;Q9Y520-6;Q9Y520-3;Q9Y520-2;H7C5N8;A0A2R8YET2;A0A2R8Y7F4;A0A0A0MS30;A0A2R8Y424	Protein PRRC2C	PRRC2C	1896100000	1457200000	2035000000	2310700000	2260100000	2206000000	1160900000	1708600000	1299300000	1656300000	1631200000	1730800000
E7EPP7;Q6ZWJ1;B5MCT9;Q6ZWJ1-2	Syntaxin-binding protein 4	STXBP4	146140000	160640000	121420000	55868000	0	0	169370000	128910000	130190000	40730000	0	0
E7EPS8;P28827;P28827-2;J3QLI4	Protein-tyrosine-phosphatase;Receptor-type tyrosine-protein phosphatase mu	PTPRM	0	9448000	0	0	0	0	0	0	9311200	0	0	11574000
E7EPT4;P19404	NADH dehydrogenase [ubiquinone] flavoprotein 2, mitochondrial	NDUFV2	1961400000	1907700000	1911300000	1048200000	1170900000	1079500000	1865800000	1926100000	1845100000	1082900000	1134400000	1192600000
E7EPV7;P37840-2;P37840;H6UYS7;P37840-3;D6RA31	Alpha-synuclein	SNCA	104230000	88542000	93009000	102410000	118060000	117170000	51192000	58510000	61517000	0	0	51017000
E7EQ45;Q9H0R1;Q9H0R1-2	AP-5 complex subunit mu-1	AP5M1	22215000	19346000	21057000	26064000	34172000	0	32465000	24272000	25100000	24802000	29018000	0
E7EQ69;Q9GZZ1;C9J5D1;A0A087WWJ2;Q9GZZ1-2;B0AZT5;C9JZU6;C9J5J3;A0A0D9SF32;F8WCK0	N-alpha-acetyltransferase 50	NAA50	1407400000	1624600000	1700400000	1271700000	1517700000	1475000000	1663600000	1781600000	2000200000	1745000000	1680400000	1553100000
E7EQJ0		HNRNPH1	65081000	0	0	0	0	0	0	0	58214000	0	0	0
E7EQR4;P15311	Ezrin	EZR	24103000000	25834000000	21957000000	23796000000	21591000000	20651000000	24140000000	22950000000	25923000000	28041000000	21066000000	23020000000
E9PES6;E7ES08;E7EQU1;O15347	High mobility group protein B3	HMGB3	744280000	663490000	729220000	335360000	366570000	391790000	769280000	811980000	953190000	768290000	701250000	628400000
E7EQY4;E7EV10;Q9BTC8-2;Q9BTC8;D6W5A2;E9PCS8;E9PF88;H0YIT0	Metastasis-associated protein MTA3	MTA3	231810000	177480000	243130000	226200000	224700000	233500000	224260000	229440000	239050000	280760000	327360000	243210000
E7ERI8;E7EW49;O75122-3	CLIP-associating protein 2	CLASP2	1395800000	1292600000	1269400000	1278800000	1284500000	1284900000	1092400000	1151800000	1163700000	1208500000	1161300000	1136400000
E7ERS3;Q86VM9;Q86VM9-2;H3BRN6;H3BRH3;H3BP01;H3BPD0	Zinc finger CCCH domain-containing protein 18	ZC3H18	424910000	488080000	449530000	556170000	616840000	609120000	469050000	446970000	446580000	510470000	498000000	531860000
E7ERS5		VRK2	0	0	0	0	0	0	0	0	0	0	0	0
F8W7U3;E7ESD2;Q641Q2-2;Q641Q2;A0A087WYF6	WASH complex subunit FAM21A	FAM21A	521790000	566640000	511690000	625240000	648560000	631590000	613510000	568550000	564850000	591800000	621590000	575880000
E7ESL0;J3KQY1;Q9NWU5;Q9NWU5-2;Q9NWU5-3	39S ribosomal protein L22, mitochondrial	MRPL22	355110000	325790000	422750000	264280000	180390000	198630000	301400000	376050000	412470000	258930000	255050000	241490000
E7ESP4;E7EMF1;E9PB77;D6RG08		ITGA2	0	0	0	0	100520000	0	32856000	0	0	39434000	0	71263000
E7ET07;Q9NXR8	Inhibitor of growth protein;Inhibitor of growth protein 3	ING3	22551000	25943000	24034000	28417000	25377000	22234000	27851000	25913000	31986000	21134000	12577000	21610000
E7ET49;Q8NCG7-2;Q8NCG7-4;Q8NCG7	Sn1-specific diacylglycerol lipase beta	DAGLB	41522000	26805000	37031000	51029000	67590000	0	29871000	30900000	30990000	46760000	53516000	70125000
E7ETP9;Q9UQV4	Lysosome-associated membrane glycoprotein 3	LAMP3	0	6950500	0	360800000	428710000	343730000	8884300	9201600	0	218520000	151400000	444860000
E7ETU5;F6Y5H0;P29558-2;P29558;E7EPF2;C9J9B2;C9JIJ9;A0A1B0GUW5;Q6XE24-3;Q6XE24-4;Q6XE24-5;Q6XE24-2;Q6XE24	RNA-binding motif, single-stranded-interacting protein 1	RBMS1	160520000	146550000	146790000	218230000	199100000	183230000	135380000	135670000	146580000	144080000	173660000	174670000
H0Y9G6;E7ETU7;P09001;E9PF06;D6RC14;D6RBQ5	39S ribosomal protein L3, mitochondrial	MRPL3	489160000	490790000	513660000	319890000	364440000	348990000	421160000	395600000	301650000	221730000	64378000	281700000
E7ETY2;Q13428-7;A0A3B3IS06;J3KQ96;Q13428-6;H0Y8Y7;Q13428-5;A0A2R8Y857;H0YA99;A0A2R8Y4M7	Treacle protein	TCOF1	34085000	44588000	55473000	29549000	35911000	36736000	61697000	44633000	51059000	40030000	69695000	49234000
E7ETY7;Q8TED1	Glutathione peroxidase;Probable glutathione peroxidase 8	GPX8	13282000	0	0	85241000	94521000	94524000	0	0	0	102870000	51671000	144150000
E7ETZ4;Q9Y6E2;B5MCH7;Q75MG1;B5MCE7;E9PFD4;E7EMS9;Q9Y6E2-2;C9JF98;E9PFE3;F8WDX8	Basic leucine zipper and W2 domain-containing protein 2	BZW2	1649800000	1714300000	1524300000	708840000	693900000	774150000	1798100000	1929100000	1883500000	897240000	983970000	900060000
E7EUU4;Q04637-8;Q04637;E7EX73;E9PGM1;Q04637-3;Q04637-9;Q04637-5;Q04637-4;Q04637-7;Q04637-6;C9JF13;C9J6B6;C9K073;C9J2Z7;H7C044;H7C0V6;REV__J3KQX6;REV__C9JQZ6;C9JHW9;REV__Q8NEG2;REV__F5H7J8;REV__Q8NEG2-2;C9JWW9;C9JSU8;C9JIH5;C9J556;C9JWH7;C9JWH9;F8WCF2	Eukaryotic translation initiation factor 4 gamma 1	EIF4G1	14426000000	13065000000	14025000000	9880700000	9776000000	9299300000	10568000000	12981000000	11556000000	10918000000	9221400000	9971500000
E7EUY3;E9PDR0;E7EX59;P05166;P05166-2;E9PEC3;E7ETT4;E7ETT1;C9JQS9;F8WBI9;E7ENC1;C9JAW3;C9JVW9;H7C5C9	Propionyl-CoA carboxylase beta chain, mitochondrial	PCCB	292050000	320340000	320770000	354130000	385350000	360440000	333790000	372220000	337980000	250990000	247000000	318900000
E7EV01;O15484;A0A3B3IRX8;E9PS73	Calpain-5	CAPN5	251750000	259870000	252810000	279010000	294710000	315590000	231620000	255440000	238220000	454070000	411180000	339410000
E7EVA0;P27816-4;H0Y2V1;B5MEG9;F8W9U4;A0A0J9YVV8;A0A0J9YW37	Microtubule-associated protein	MAP4	8982100000	5651000000	9093100000	17816000000	17594000000	16438000000	4246800000	8041700000	5412900000	17061000000	13092000000	15176000000
E7EVC7;Q676U5-2;Q676U5;Q676U5-5;Q676U5-3;Q676U5-4;C9J1B2;C9JAY7;C9JK97;C9J8C6;F8WAF9	Autophagy-related protein 16-1	ATG16L1	281500000	398020000	299500000	322910000	345840000	315130000	328140000	346040000	381420000	341360000	371330000	348460000
E7EVH9;Q08623-3;Q08623;Q08623-4;Q08623-2	Pseudouridine-5-phosphatase	HDHD1	1778000000	1977500000	1632600000	1075800000	1026600000	965640000	1713700000	1554800000	1797000000	1413800000	1845800000	1716600000
E7EVJ3;P52848-2;P52848;E5RG58;O95803-2;O95803-3;Q9H3R1;O95803	Bifunctional heparan sulfate N-deacetylase/N-sulfotransferase 1;Heparan sulfate N-deacetylase 1;Heparan sulfate N-sulfotransferase 1	NDST1	14077000	11630000	19545000	37440000	40817000	33302000	9049700	18336000	8890400	24329000	18600000	34956000
E7EVK2;U3KQ69;E9PI62;Q9BT17;Q9BT17-2	Mitochondrial GTPase 1;Mitochondrial ribosome-associated GTPase 1	MTG1	69954000	39436000	42542000	0	0	0	60886000	47018000	51554000	55590000	0	53725000
E7EVQ5		CTHRC1	0	0	0	84507000	100350000	115260000	0	0	0	22950000	34236000	0
E7EVQ6;Q14534;H0YBN7;E5RJH9	Squalene monooxygenase	SQLE	307540000	137200000	308050000	18240000	15076000	0	70600000	101620000	72841000	15328000	0	0
E7EVV8;Q0VG06-2;Q0VG06-3;Q0VG06;I3L2L9	Fanconi anemia-associated protein of 100 kDa	C17orf70;FAAP100	0	2249900	1891000	0	1744000	0	2511800	2198000	2569800	0	0	1592600
E7EVY3;H0Y9H6;A0A0A0MR45;H0YD33		CAST	0	0	0	29436000	34517000	34101000	17634000	30698000	0	24660000	27099000	30744000
E7EW84;Q8TAG9;Q8TAG9-2;F2Z3K0;B1AP46	Exocyst complex component 6	EXOC6	337600000	400070000	371810000	248280000	290330000	351290000	356020000	304050000	334050000	342020000	238360000	332150000
E7EWD6;Q76L83;Q76L83-2	Putative Polycomb group protein ASXL2	ASXL2	17923000	11962000	18735000	14478000	16845000	20711000	12548000	0	13177000	14979000	10554000	12949000
E7EWN3;Q9C0A6-2;Q9C0A6-3;Q9C0A6;H0Y3R4	SET domain-containing protein 5	SETD5	3966300	3733200	0	0	5030400	6570700	0	0	3934600	0	0	0
E7EWP2;O75962-5;O75962-2;O75962-4;O75962;E7EPJ7;F5H228;A0A087X139;A0A1W2PRD7	Triple functional domain protein	TRIO	43199000	46721000	37306000	62813000	78426000	58710000	50549000	44926000	42115000	37181000	46377000	26056000
F5H7K1;E7EWW0;Q7Z3J2;C9J7I2;Q7Z3J2-2;H3BV68;H3BVG8;H3BRV8;H3BUS7;H3BNX2;F6S1J4	UPF0505 protein C16orf62	C16orf62	25986000	23578000	16347000	19842000	39475000	31083000	16639000	25475000	20363000	27135000	43312000	27829000
E7EX17;P23588;P23588-2;F8VX11;F8VP89;F8VSC7;F8W0K0;F8VYE9;F8VRU1	Eukaryotic translation initiation factor 4B	EIF4B	5047900000	5386600000	4660400000	3778100000	3437200000	3331900000	5346500000	4662800000	5206100000	3328200000	2439300000	3186200000
Q14203-3;E7EX90;Q14203;Q14203-6;Q14203-4;Q14203-2;Q14203-5;Q6AWB1;E7EWF7;C9JJD0;E9PCY0;C9JJN7;C9JKG6;C9JTE5;C9JZA4;C9J1B7;C9JUI8	Dynactin subunit 1	DCTN1;DKFZp686E0752	6789300000	7387200000	7157600000	6349000000	6748200000	6246600000	7146200000	6563600000	6977100000	5972900000	5913500000	6085400000
E7EXA6;Q8WVB6;Q8WVB6-2;A0A0D9SF58;Q8WVB6-3;F8WCC1	Chromosome transmission fidelity protein 18 homolog	CHTF18	78162000	93301000	74527000	36114000	37145000	34240000	76658000	90913000	89157000	70161000	48585000	58751000
F8VZJ2;H0YHX9;Q13765;E9PAV3-2;E9PAV3;F8W0W4;F8W1N5;F8VNW4;F8VZ58;Q9BZK3	Nascent polypeptide-associated complex subunit alpha;Nascent polypeptide-associated complex subunit alpha, muscle-specific form	NACA	5223000000	5393600000	5326900000	4162800000	4833300000	4117700000	5267300000	5832200000	5969500000	4781600000	6448300000	5058800000
E9PB61;Q86V81	THO complex subunit 4	ALYREF	5231100000	4274500000	5890300000	5950200000	5838000000	6557500000	4217400000	5802600000	4537700000	6984500000	7955200000	7696700000
F6PQP6;E9PBC1;I3L2B2;O95208-2;O95208;O95208-3;I3L356;I3L2H1;O95208-5;J3KSF8;J3KTF6;J3KSA6;J3KSC7;J3QLN2	Epsin-2	EPN2	137880000	109020000	150370000	145590000	171220000	142320000	150510000	130880000	139860000	146930000	171780000	167680000
E9PBG5;O14924-5;O14924-4;O14924	Regulator of G-protein signaling 12	RGS12	0	0	0	0	0	0	0	0	0	0	0	0
E9PC49;Q96EB6;B0QZ35;Q96EB6-2	NAD-dependent protein deacetylase sirtuin-1;SirtT1 75 kDa fragment	SIRT1	80739000	84894000	64254000	86737000	102360000	103350000	78592000	36701000	64767000	60036000	57351000	51451000
E9PC66;P17029;B3KRF7;C9JRM9	Zinc finger protein with KRAB and SCAN domains 1	ZKSCAN1	122970000	112650000	57684000	83962000	116590000	105610000	71859000	105040000	90642000	70196000	65545000	75458000
Q7KZI7-14;E9PC69;Q7KZI7;Q7KZI7-6;Q7KZI7-8;Q7KZI7-3;Q7KZI7-16;Q7KZI7-13;Q7KZI7-12;E7ETY4;Q7KZI7-11;Q7KZI7-7;Q7KZI7-2;Q7KZI7-15;Q7KZI7-9;Q7KZI7-4;Q7KZI7-5;Q7KZI7-10;F5H4F6;F5H6N2;Q9P0L2-3;Q9P0L2-2;Q96L34;Q96L34-2;K7EK17;Q6IPE9;F5H4J8;K7EKG8;K7EN95	Serine/threonine-protein kinase MARK2	MARK2	554480000	371590000	509940000	588860000	526390000	638190000	260660000	474430000	345010000	517270000	463480000	523260000
E9PC90;P14635-2;P14635;H0YA62	G2/mitotic-specific cyclin-B1	CCNB1	115540000	79403000	154160000	78066000	91818000	95269000	113770000	150160000	118560000	111090000	116930000	48914000
E9PCH4;Q8TEU7-5;Q8TEU7-3;Q8TEU7;Q8TEU7-4;D6RE77;B7Z7Y1;Q8TEU7-2;Q8TEU7-6	Rap guanine nucleotide exchange factor 6	RAPGEF6	42625000	38956000	31188000	38061000	33717000	48638000	23455000	27120000	27586000	30706000	45524000	0
E9PCW1;O95249;G5E9T8;K7EJC8;B4DQA8;O95249-2;F6RU00	Golgi SNAP receptor complex member 1	GOSR1	341000000	409250000	293850000	612320000	970390000	611390000	354530000	275370000	341030000	593540000	418270000	397540000
H0YKE5;O00470-2;U3KPR8;H0YKN2;H0YNY8;U3KQI2;E9PDC4;H0YMX5;U3KQ95;F5GYS8;O14770-4;O14770-3;O14770-2;O14770-8;O00470;O14770-5;O14770-7;O14770-6;O14770;Q99687-2;A6NDR6;U3KQV2;Q99687;A8K0S8;Q99687-3;H3BLU4;H0YNA8	Homeobox protein Meis1;Homeobox protein Meis2;Homeobox protein Meis3;Putative homeobox protein Meis3-like 1;Putative homeobox protein Meis3-like 2	MEIS2;MEIS1;MEIS3;MEIS3P1;MEIS3P2	18378000	14023000	22490000	9339500	0	0	0	12902000	13821000	10046000	0	0
E9PDF6;O43795;E7EQD9;H7C2Y7;C9JYW1;C9JUP5;A0A0U1RRI3;C9K0I9	Unconventional myosin-Ib	MYO1B	5522900000	5501100000	5558500000	8808700000	9078100000	8606300000	6147500000	6278700000	6629800000	10439000000	10915000000	9671800000
E9PDI4;O00515;A0A0J9YYF6;A0A0J9YW63;A0A0J9YVY2;H0Y901	Ladinin-1	LAD1	30014000	34029000	32540000	61365000	0	42267000	78377000	61231000	70368000	31385000	33074000	96844000
E9PEI0;Q69YH5	Cell division cycle-associated protein 2	CDCA2	45588000	31014000	37849000	0	0	0	23833000	29689000	45547000	31656000	0	29269000
H0Y547;E9PEJ6;P98196;H0Y8F0	Phospholipid-transporting ATPase;Probable phospholipid-transporting ATPase IH	ATP11A	63356000	35239000	38228000	54439000	58555000	50715000	39031000	41656000	43870000	66312000	49962000	52655000
E9PEP7;P17010-2;P17010;P17010-3;P08048-2;P08048-3;P08048;Q9Y462;Q9Y462-2;Q9Y462-3	Zinc finger X-chromosomal protein;Zinc finger Y-chromosomal protein	ZFX;ZFY	25994000	22932000	27946000	33263000	28073000	25152000	19160000	36686000	25761000	56342000	31976000	50852000
E9PER6;O15530-3;O15530;O15530-2;O15530-4;Q6A1A2;O15530-5;H3BQ10	3-phosphoinositide-dependent protein kinase 1;Putative 3-phosphoinositide-dependent protein kinase 2	PDPK1;PDPK2P	269080000	267340000	287860000	233690000	233600000	194450000	287850000	258910000	268690000	220540000	263080000	262770000
E9PF18;Q16836;Q16836-3;Q16836-2;A0A0A0MSE2;A0A0D9SFP2;A0A1W2PQV5;A0A1W2PNM1;A0A1W2PQC2;A0A1W2PRT2;A0A1W2PQ78;A0A1W2PP40;A0A1W2PQ55	Hydroxyacyl-coenzyme A dehydrogenase, mitochondrial	HADH	7594800000	7784500000	6271700000	3123100000	2851000000	3727000000	8297800000	7436600000	7777000000	4964500000	4727300000	4683500000
E9PF19;Q9Y4P3;Q96E41;A0A087WXC6;F8WDI9;F8WCR3	Transducin beta-like protein 2	TBL2	752810000	531290000	895570000	987350000	911740000	1023900000	486400000	754470000	582540000	1004400000	824370000	971890000
E9PFH1;P61587	Rho-related GTP-binding protein RhoE	RND3	0	0	0	16427000	26623000	21809000	0	0	0	38331000	46907000	43826000
E9PFK9;Q9UJ41;Q9UJ41-4;Q9UJ41-3;Q3HKR1;A0A0A0MSJ3;V9GYI8;C9JDA2;A0A1W2PPY0;E9PHB8	Rab5 GDP/GTP exchange factor	RABGEF1	142470000	148740000	177410000	140970000	158380000	166660000	252590000	174430000	218810000	142630000	93133000	99027000
Q9Y6M7-7;Q9Y6M7-9;Q9Y6M7-11;Q9Y6M7-6;Q9Y6M7-8;Q9Y6M7-12;E9PFN4;Q9Y6M7-13;Q9Y6M7-14;Q9Y6M7-10;A0A0A0MST8;Q9Y6M7-2;Q9Y6M7;C9JRP1;Q9Y6M7-3;Q9Y6M7-4;Q9Y6M7-5;H7C3C4	Sodium bicarbonate cotransporter 3;Anion exchange protein	SLC4A7	137440000	134980000	151160000	261260000	233450000	247920000	174570000	153170000	150840000	292110000	364720000	369410000
E9PFR3;Q14738;H0Y8C4;Q14738-2;Q14738-3;H7C5Q9;H0YJ35	Serine/threonine-protein phosphatase 2A 56 kDa regulatory subunit delta isoform	PPP2R5D	775770000	614530000	781880000	660100000	683280000	700540000	514370000	648710000	525510000	552030000	529840000	539540000
E9PFZ2;P00450;H7C5R1;D6RE86	Ceruloplasmin	CP	154940000	220560000	128730000	227620000	426300000	168480000	188700000	168650000	222280000	209690000	239760000	172910000
E9PG22;Q8IW35;Q8IW35-2;F8WF91;H7C4Y5	Centrosomal protein of 97 kDa	CEP97	26160000	30902000	39845000	34668000	44883000	47205000	31924000	21214000	23962000	37205000	0	53922000
E9PGC0;P20936-2;P20936-4;P20936;P20936-3	Ras GTPase-activating protein 1	RASA1	266520000	199880000	231920000	171960000	129690000	188180000	198480000	264680000	253950000	214030000	205180000	188650000
Q5TG12;E9PGC5;Q15262;Q15262-2;Q15262-3;Q15262-4;H0Y6V4;A0A0G2JQF6;H0Y6P5;H0YDP9;E9PRW2	Protein-tyrosine-phosphatase;Receptor-type tyrosine-protein phosphatase kappa	PTPRK	145420000	131290000	163790000	156680000	141180000	162580000	147870000	139680000	142730000	186000000	190570000	192170000
H9KV48;E9PGN7;P05155-2;P05155;P05155-3	Plasma protease C1 inhibitor	SERPING1	0	46048000	0	150180000	143100000	131710000	44553000	46547000	63352000	76208000	31444000	0
E9PGT3;Q15418-4;Q15418;Q15418-2;Q15418-3;E9PAN7;E9PMM7;Q5SVM6	Ribosomal protein S6 kinase;Ribosomal protein S6 kinase alpha-1	RPS6KA1	872760000	813230000	809220000	1323700000	1552000000	1377000000	696530000	851580000	907280000	1166700000	1019500000	1031600000
E9PH99;Q9Y4E5-2;Q9Y4E5;D6RIA1	Zinc finger protein 451	ZNF451	183760000	183920000	160070000	166100000	166150000	241230000	160610000	139480000	157040000	135360000	140860000	121940000
E9PHA2;Q15003;C9J470;Q15003-2;C9JZP1;H7C415	Condensin complex subunit 2	NCAPH	1069800000	1142500000	1023700000	438930000	498850000	415280000	1077100000	1063600000	1123200000	722140000	1039100000	759700000
O94901-9;E9PHI4;O94901-8;O94901-5;O94901;O94901-6;H0Y6N5;H0Y742;O94901-3;O94901-7;H7C2K3;O94901-2;C9JK55;H7C019;C9K051;C9JS54;H7C3X3;C9JJU6;O94901-4;C9JR15	SUN domain-containing protein 1	SUN1	532770000	287190000	559510000	599840000	640460000	639550000	140000000	432870000	255390000	498970000	400070000	451740000
E9PHM2;Q15031;A0A494C1E0;A0A499FJL2	Probable leucine--tRNA ligase, mitochondrial	LARS2	700390000	648220000	702720000	748960000	758750000	716460000	681750000	757730000	690530000	656000000	660410000	772680000
Q03001;F6QMI7;E9PHM6;Q03001-14;F8W9J4;Q03001-8;A0A0U1RQJ2;A0A494C1D7;E7ETB9;Q03001-9;Q6P0N6;Q03001-13;A0A494C073;Q5T0V7;A0A494C1U5;Q03001-10;H0YC82;H0YC65	Dystonin	DST	112180000	64597000	66469000	981530000	365240000	359950000	141520000	330230000	356250000	916080000	436630000	1936200000
E9PHV5;P28290;P28290-2;P28290-3;E7EUL7;H7BZ26	Sperm-specific antigen 2	SSFA2	205900000	170830000	175370000	238240000	344060000	351620000	202110000	248450000	186490000	208870000	266290000	201810000
E9PHY5;O43491-4;E9PK52;O43491-3;E9PII3;O43491-2;A0A2R8Y5B3;E9PQD2;E9PQN0;E9PRG1;E9PIG0;E9PJP4;J3QS55	Band 4.1-like protein 2	EPB41L2	76406000	69429000	21804000	68307000	0	0	46718000	0	98869000	95871000	104810000	67206000
E9PHY8;Q8NDA8;Q8NDA8-2;Q8NDA8-7;Q8NDA8-6;Q8NDA8-4;Q8NDA8-3;Q8NDA8-5	Maestro heat-like repeat-containing protein family member 1	MROH1	131810000	115550000	38652000	0	18693000	87103000	263240000	141670000	198430000	99530000	218960000	85730000
E9PIE4		MTCH2	40435000	33945000	43612000	0	34487000	36767000	0	0	0	0	0	22640000
Q13206;E9PIF2;A0A3B3ISR7	Probable ATP-dependent RNA helicase DDX10	DDX10	384130000	305210000	323750000	316090000	394590000	389660000	314280000	360390000	344040000	329660000	324620000	271870000
F8W1V1;E9PIV2;F8VSD2;P24001-4;P24001-3;P24001-2;P24001	Interleukin-32	IL32	0	0	0	24375000	21545000	27370000	0	0	0	0	0	26092000
Q6SPF0;E9PIW9;F8WDT5	Atherin	SAMD1	67457000	61339000	65044000	55649000	52064000	35449000	56557000	63802000	66863000	49333000	70414000	49224000
E9PIY5;E9PMK1;E9PL86;E9PSA0;Q96BU1-2;Q96BU1	S100P-binding protein	S100PBP	0	0	0	3842600	4404800	5056700	0	0	0	0	0	0
E9PJ55;Q9NUJ3;H0YES4	T-complex protein 11-like protein 1	TCP11L1	47715000	51436000	36842000	58290000	44265000	34849000	37908000	54810000	54966000	55790000	41496000	39946000
E9PKP4;H7BY18;E9PQ08;E9PJA2;P09603-3;P09603-2;P09603	Macrophage colony-stimulating factor 1;Processed macrophage colony-stimulating factor 1	CSF1	0	0	0	0	11644000	0	0	0	0	0	0	20739000
E9PJD7;Q6ZMK1-2;Q6ZMK1;E9PQ42;Q6ZMK1-4	Cysteine and histidine-rich protein 1	CYHR1	18940000	0	0	40049000	58442000	56452000	28331000	26267000	23865000	63528000	57385000	64416000
E9PJF3;P49326-2;P49326-3;P49326;E9PQ84;E9PP51	Dimethylaniline monooxygenase [N-oxide-forming] 5	FMO5	22848000	9876100	16687000	0	0	0	14884000	16101000	12234000	0	0	0
E9PJF5;H0YCF7;G5E9I4;Q9HCU9;E9PPD1	Breast cancer metastasis-suppressor 1	BRMS1	53267000	44732000	35568000	34153000	38018000	44232000	53489000	35990000	46827000	42451000	61782000	39873000
E9PJM3;Q9UK99-2;Q9UK99;G3V1E0;Q9UK99-3;E9PL46;Q49AF1;B4E3U2	F-box only protein 3	FBXO3	39208000	29823000	37460000	39642000	32218000	28692000	41441000	37616000	43201000	33443000	0	42873000
E9PJN9		RPS3	0	0	0	0	0	13438000	11133000	0	14064000	29118000	0	0
E9PK54		HSPA8	0	0	0	0	0	0	0	0	0	0	19387000	0
E9PK67;E9PNI7;Q53GL7;E9PPE7;F8W8G7	Poly [ADP-ribose] polymerase 10	PARP10	50507000	0	0	111450000	108320000	171490000	42270000	69530000	36161000	180700000	122450000	263150000
E9PK80;E9PN58;Q9NTG7-2;Q9NTG7;E9PM75;E9PNA0;B7WNN4	NAD-dependent protein deacetylase sirtuin-3, mitochondrial	SIRT3	167310000	170680000	194650000	183170000	170120000	199420000	159100000	208310000	179490000	158310000	107090000	167140000
E9PK91;Q9NYF8-3;E9PK09;E9PQN2;E9PKI6;A0A1W2PQ43;E9PJA7;H0YF00;H0YF63	Bcl-2-associated transcription factor 1	BCLAF1	26059000	51188000	33215000	47929000	47576000	63713000	45037000	36114000	32871000	40566000	28470000	44907000
E9PKC0;Q6IQ23;Q6IQ23-2;H0YDE2;A0A1B0GTN9;Q6IQ23-3;A0A1B0GUN0;E9PL74;A0A1B0GUM1	Pleckstrin homology domain-containing family A member 7	PLEKHA7	97118000	80049000	92897000	97218000	95599000	68550000	50919000	86742000	99858000	107820000	124940000	107620000
E9PKE9;G3V148;Q9H920-2;Q9H920;Q8N4F7	RING finger protein 121	RNF121	86168000	108130000	115880000	169860000	191840000	222680000	92567000	103130000	62153000	108500000	0	85119000
E9PKP7;P17480-2;P17480;E9PMM2;E9PLT2;H0YDH7	Nucleolar transcription factor 1	UBTF	3590900000	3447400000	3876100000	2956800000	2920000000	3011000000	3733100000	3929100000	3948700000	3334600000	3293400000	3064200000
E9PL17;Q92989;Q92989-2;E9PJM4;E9PKV5	Polyribonucleotide 5-hydroxyl-kinase Clp1	CLP1	163470000	182990000	160150000	145720000	156080000	131750000	225030000	199650000	200150000	214580000	199640000	193090000
E9PL57;Q86V88-3;Q86V88-2;Q86V88;F8VSA6;E9PS38;S4R3E9	Magnesium-dependent phosphatase 1	NEDD8-MDP1;MDP1	1310300000	1402800000	1512400000	1055400000	1289400000	1148400000	1507500000	1329500000	1321700000	1015900000	1179700000	769650000
E9PLI6;E9PS76;Q8N9N8;E9PS30;E9PQD0;E9PNH5	Probable RNA-binding protein EIF1AD	EIF1AD	111350000	110130000	96303000	187420000	166360000	155820000	95756000	103080000	141040000	124410000	97097000	166450000
E9PLK3;P55786;P55786-2;A6NEC2;E9PP11;H0YDG0;A6NEC2-2;E9PJY4;E9PPD4;H0YCQ5;E9PJ74;A6NEC2-3;E9PJF9;E9PRQ5;E9PPZ2;E9PI82	Puromycin-sensitive aminopeptidase	NPEPPS	12057000000	13353000000	12600000000	11218000000	11489000000	11111000000	12715000000	12136000000	13467000000	10792000000	11450000000	10975000000
E9PPJ5;E9PLM6;P21741-2;P21741	Midkine	MDK	0	0	0	0	17195000	17485000	0	0	0	0	0	0
I3L3B4;F8W9H0;E9PLN8;Q9BQB6-3;Q9BQB6-2;Q9BQB6	Vitamin K epoxide reductase complex subunit 1	VKORC1	287230000	226980000	370560000	274110000	243260000	218140000	219920000	346820000	246640000	217470000	0	244190000
E9PLY5;E9PLY0;E9PS75;REV__O43149-2;REV__I3L141;REV__O43149		MACF1	0	15866000	23171000	26353000	24539000	24916000	21160000	23830000	21203000	32444000	34842000	35900000
E9PMC9;Q7Z589-2;Q7Z589-6;Q7Z589;Q7Z589-5;Q7Z589-4;Q7Z589-7;H0YCS3	Protein EMSY	C11orf30;EMSY	0	0	0	0	15089000	18529000	0	0	0	0	0	0
E9PMI6;J3KN38;P54105;E9PJF4;E9PQ83	Methylosome subunit pICln	CLNS1A	178700000	199880000	178330000	115400000	88312000	91619000	205180000	175550000	190980000	111290000	0	144570000
G3V179;E9PMJ2;J3KP39;Q9BPY3;E9PIM5;E9PMW3	Protein FAM118B	FAM118B	107610000	93600000	104450000	82031000	103560000	124260000	148760000	158020000	158530000	113690000	105090000	117720000
E9PMQ6;Q00613-2;Q00613;A0A087X1F9;E9PI02	Heat shock factor protein 1	HSF1	62185000	65373000	63618000	75998000	74539000	67289000	0	53666000	0	23955000	0	0
K4DIA7;E9PMR4;P48509;E9PRJ3	Tetraspanin;CD151 antigen	CD151	112590000	89035000	97516000	79209000	87944000	106530000	133150000	193520000	143590000	135000000	161020000	91819000
E9PMR6;Q9NZN5-2;Q9NZN5	Rho guanine nucleotide exchange factor 12	ARHGEF12	24598000	22234000	19628000	22792000	28644000	19792000	18255000	24829000	24181000	16498000	0	0
E9PMS6;Q8WWI1-3;J3KP06;F8WD26;E9PMT2;A0A0A0MTE2;E9PMP7;H0Y424;H0YDQ3;H0YDG6;H0YE95;E9PJ10;E9PLU6;E9PK58;E9PRJ0;E9PRE3;U3KQE6	LIM domain only protein 7	LMO7	2153400000	2148600000	2208200000	2512900000	2410100000	2380300000	2294500000	2388500000	2472500000	2258000000	2036500000	2084900000
H0YEF3;E9PN81;Q8TDP1	Ribonuclease H2 subunit C	RNASEH2C	40399000	38747000	38377000	0	0	0	24735000	24186000	29109000	15690000	0	23904000
E9PNL0;E9PP40;Q15048	Leucine-rich repeat-containing protein 14	LRRC14	0	0	0	10694000	10148000	18950000	0	0	0	0	6751800	0
E9PP16;Q8ND30-3;Q8ND30-2;Q8ND30;E9PIK8;H0YET1;H0YDJ2;E9PJA0;A0A3B3IS15;E9PI79	Liprin-beta-2	PPFIBP2	327740000	380080000	317940000	234310000	190370000	231690000	258260000	290450000	340090000	287870000	124940000	275340000
E9PPW7;O00217;E9PKH6;E9PN51;F8W9K7;H0YDT4	NADH dehydrogenase [ubiquinone] iron-sulfur protein 8, mitochondrial	NDUFS8	569310000	654920000	501380000	540590000	469650000	547830000	777420000	679500000	684540000	575780000	595430000	547050000
E9PQ56		PUF60	0	0	9789000	12718000	0	0	22231000	30364000	38825000	0	0	14308000
E9PQB8;Q9UHR6	Zinc finger HIT domain-containing protein 2	ZNHIT2	0	15328000	11530000	0	0	0	10757000	8556100	0	0	0	0
E9PQD6;P0DJI8	Serum amyloid A protein;Serum amyloid A-1 protein;Amyloid protein A;Serum amyloid protein A(2-104);Serum amyloid protein A(3-104);Serum amyloid protein A(2-103);Serum amyloid protein A(2-102);Serum amyloid protein A(4-101)	SAA1	0	0	0	193880000	263910000	158950000	0	0	0	284320000	234420000	206050000
E9PQL1;Q8TAV0-5;Q8TAV0-2;Q8TAV0;Q8TAV0-4;Q8TAV0-3	Protein FAM76A	FAM76A	0	0	0	0	0	0	0	0	0	0	0	0
E9PQZ1;H0YE72;H0YE58;E9PKK3;E9PNW6;E9PQC9;E9PJD0		EEF1D	43190000	47423000	49895000	0	27464000	0	53858000	49409000	45518000	0	0	29325000
P62861;E9PR30;E9PM49	40S ribosomal protein S30	FAU	3817800000	2994300000	3907900000	2093100000	2132500000	2448900000	3183700000	3383700000	3305200000	2906200000	2290500000	2475700000
E9PR71;Q9P2Y5	UV radiation resistance-associated gene protein	UVRAG	23356000	20635000	30987000	8888800	24638000	17176000	21855000	21186000	17782000	25817000	30942000	27785000
E9PRG8;E9PLD3;A0A494BXY3	Uncharacterized protein C11orf98	C11orf98	101970000	109730000	118250000	112670000	152110000	142600000	122060000	122670000	108440000	121230000	75282000	92643000
E9PRK7;Q8N8R7	ARL14 effector protein	ARL14EP	0	0	0	26113000	38156000	24256000	32932000	37009000	40591000	38980000	37238000	44391000
E9PRQ7;Q04323;E9PJ81;Q04323-2;A0A087WTZ5;E9PS08	UBX domain-containing protein 1	UBXN1	1340900000	1437000000	1237000000	1499700000	1467400000	1276400000	1207500000	1201000000	1504800000	1818000000	1775400000	1768500000
E9PRR7;Q14331	Protein FRG1	FRG1	46170000	39705000	55966000	67594000	97701000	71601000	57835000	63813000	86647000	55957000	88090000	0
J3KND1;E9PRZ1;Q96ER3;H0YEK5;E9PMD2;H0YCN7	Protein SAAL1	SAAL1	232410000	364590000	211820000	150040000	135490000	54077000	240390000	279500000	367020000	155610000	82388000	154620000
E9PS00;Q9Y5Q0	Fatty acid desaturase 3	FADS3	13833000	9477200	23564000	22023000	34055000	15425000	13410000	15485000	0	26410000	27558000	21135000
E9PS17;Q96KG9-3;Q96KG9-2;Q96KG9;E9PK59;Q96KG9-4;Q96KG9-5;Q96KG9-6;E9PPN3;A0A0A0MQX4;H0YCI6;H0YDH0	N-terminal kinase-like protein	SCYL1	636900000	585650000	686050000	548990000	606070000	508600000	579000000	657160000	623910000	538190000	646640000	620460000
E9PS44;H7BYV1;E9PQN9;Q01629		IFITM3	0	0	0	66974000	75610000	71114000	0	0	0	0	0	0
E9PSI1;E9PMQ9;O15321-2;O15321;E9PL78;E9PJM1;E9PQY7;E9PS99;G3V1B9;E9PJC4;E9PQI5;E9PNW2;E9PQ80;H0YI89	Transmembrane 9 superfamily member 1	TM9SF1	395220000	359880000	401320000	692500000	775300000	681710000	356880000	358160000	324910000	383590000	572390000	430700000
G3V0I0;F2Z2A9;O75896	Tumor suppressor candidate 2	TUSC2	17411000	17299000	21571000	21120000	23850000	20453000	20240000	21505000	0	24098000	0	21725000
F2Z2U4;Q9Y4A5-2;Q9Y4A5;H0Y4W2;A0A2R8YFJ4	Transformation/transcription domain-associated protein	TRRAP	1345800000	1338600000	1296000000	1268100000	1187300000	1345300000	1351100000	1309400000	1362000000	1434000000	1713400000	1563900000
Q99829;F2Z2V0;B0QZ18;A6PVH9;E7ENH5;Q5JX56;Q5JX58;Q5JX59;Q5JX60;Q5JX44;Q5JX55;Q5JX45;Q5JX52;Q5JX61;Q5JX54;E7EV27;Q5JX57;H0Y524;Q5JX53	Copine-1	CPNE1	5721900000	5804600000	6001100000	4678600000	5085000000	4858900000	5606700000	5370100000	5251100000	5127500000	6078400000	5256100000
F2Z2W7;Q8IZ69;Q8IZ69-2;C9K041;H7C100;H7BZZ4	tRNA (uracil-5-)-methyltransferase homolog A	TRMT2A	141540000	174430000	178150000	139480000	160860000	162920000	157380000	202250000	153840000	193040000	173720000	218340000
Q4TT34;F2Z2X0;O00746;A0A087WVT9;H0Y6J0;O00746-2;A2IDC9	Nucleoside diphosphate kinase;Nucleoside diphosphate kinase, mitochondrial	NME4	339470000	300890000	348850000	447190000	386690000	357030000	362980000	369200000	421010000	379640000	287850000	331580000
F2Z2X4;Q9C0E2	Exportin-4	XPO4	668430000	667070000	570440000	552370000	609350000	578010000	584170000	669660000	664590000	607490000	525380000	604690000
F2Z2Y6;O95777;C9JNV3;C9JIZ0	U6 snRNA-associated Sm-like protein LSm8	LSM8	548170000	743500000	705700000	620910000	622530000	398020000	703610000	721810000	615310000	563000000	724330000	755110000
F2Z3A8;Q7Z494-3;Q7Z494-6;Q7Z494	Nephrocystin-3	NPHP3	0	0	0	0	17354000	0	0	0	0	0	0	0
F2Z3H6;Q9BQE9-4;Q9BQE9;Q9BQE9-2	B-cell CLL/lymphoma 7 protein family member B	BCL7B	23739000	28275000	29477000	22507000	36732000	27137000	44838000	36801000	41702000	32208000	29360000	40723000
F5GWD3;Q13889-2;Q13889;F5H6X0;F5GXG6;H0YFF7;F5GX35;F5H4K7;A0A087WYD5	General transcription factor IIH subunit 3	GTF2H3	125980000	116810000	104200000	176050000	202360000	154600000	81096000	97647000	104330000	126080000	82733000	86912000
F5GWD8;F5GXH6;F5H6U7;Q9Y3E0	Vesicle transport protein GOT1B	GOLT1B	28372000	10984000	38783000	34668000	43936000	32336000	19735000	26869000	11130000	14390000	18408000	13146000
F5GWE5;Q00169;I3L4H1;I3L459;I3L2X8;I3L4C0;I3L471;I3L4U7;I3L3W1;I3NI10	Phosphatidylinositol transfer protein alpha isoform	PITPNA	1095800000	1124300000	1150800000	1144100000	1244900000	1263800000	1021700000	1081700000	1157100000	1243500000	1387700000	1087800000
F5GWH5;P61165	Transmembrane protein 258	TMEM258	190710000	121870000	172150000	224370000	250570000	253310000	101880000	175610000	130440000	299860000	199760000	264160000
F5GWT4;Q9H4A3-2;Q9H4A3;Q9H4A3-5;Q9H4A3-6;Q9H4A3-7;Q9H4A3-4;F6UYG0;H0YH68	Serine/threonine-protein kinase WNK1	WNK1	363340000	447490000	352500000	292720000	260820000	236490000	275250000	309530000	363190000	265900000	123380000	200710000
F5GX09;Q5HYJ3-3;Q5HYJ3-2;Q5HYJ3	Protein FAM76B	FAM76B	0	2733600	0	0	0	0	2929900	2575000	2783400	3636600	2056100	2123700
H3BUJ1;F5GXC5;Q8TB96	T-cell immunomodulatory protein	ITFG1	0	0	0	0	0	0	0	0	0	22894000	33856000	0
O95260-2;F5GXE4;B4E107	Arginyl-tRNA--protein transferase 1	ATE1	592920000	538620000	636290000	607950000	644740000	633520000	551370000	591750000	528740000	769720000	737990000	877960000
F5GXW1;H0Y599;Q8N1I0-2;Q8N1I0;Q8N1I0-3;H0Y7H7	Dedicator of cytokinesis protein 4	DOCK4	11276000	8706200	9901900	13238000	10755000	0	0	17128000	10362000	0	0	0
F5GXW6;O95415	Brain protein I3	BRI3	18567000	0	25352000	0	45897000	33633000	24693000	22650000	20042000	25333000	55077000	32404000
F5GXX5;P61803;F5H895;A0A0B4J239	Dolichyl-diphosphooligosaccharide--protein glycosyltransferase subunit DAD1	DAD1	658590000	141110000	780050000	361660000	583410000	600960000	290150000	660970000	266320000	257020000	694400000	570690000
H3BPC9;F5GY73;Q5U623-2;Q5U623	Activating transcription factor 7-interacting protein 2	ATF7IP2	3574300	3698500	0	0	3314300	4571700	0	2913600	3256200	0	0	0
F5GYF8;O43166-3;O43166-2;O43166	Signal-induced proliferation-associated 1-like protein 1	SIPA1L1	0	0	0	0	0	0	0	0	0	0	0	0
H0YGR4;F5GYG5;Q9Y3B8;H0YG54;Q9Y3B8-2;Q9Y3B8-3;F5H784;H0YF66;F5H7P1;Q9BTR4;F5H6P8;H0YG37	Oligoribonuclease, mitochondrial	REXO2	207990000	263660000	185810000	383440000	451830000	401070000	374120000	314720000	323850000	424920000	437940000	537230000
F5GYJ5;Q9NX18	Succinate dehydrogenase assembly factor 2, mitochondrial	SDHAF2	30957000	25909000	25597000	0	12867000	0	32744000	20025000	27430000	0	0	12450000
F5GYQ1;P61421;R4GN72;J3QL14;H3BQB4;H3BSG7;H3BQJ1;H3BUQ0;H3BTB5	V-type proton ATPase subunit d 1	ATP6V0D1	1292600000	1321800000	1329200000	1360400000	1207400000	1436400000	1519900000	1314900000	1387700000	1279400000	1210300000	1257600000
F5H324;F5GYY5;P51690;Q5FYA8;C9J5G7;P54793	Arylsulfatase E	ARSE	648530000	335600000	612350000	410300000	391200000	393210000	333100000	540680000	417390000	442660000	314490000	483330000
F5GZ97;Q9Y3C0;H0YGN0;F5GWI9;F5GXZ7	WASH complex subunit CCDC53	CCDC53	57699000	74587000	75825000	65073000	60639000	78174000	59751000	47494000	69466000	62144000	103040000	89832000
F5GZQ4		LDHA	0	29884000	0	0	0	0	18352000	0	18059000	0	0	0
F5GZY7;Q9H0R8;Q9H0R8-2;F5GX12;F5H007;G3V1T7	Gamma-aminobutyric acid receptor-associated protein-like 1	GABARAPL1	173650000	170720000	236910000	451440000	352760000	302330000	178900000	266920000	198760000	252110000	238390000	205670000
F5H008;Q9H267;A0A2R8YDQ0;Q9H267-2;G3V3F9	Vacuolar protein sorting-associated protein 33B	VPS33B	368200000	351730000	389520000	375100000	394340000	385900000	384600000	398590000	334380000	404700000	467910000	465830000
F5H039;Q9NQX3;Q9NQX3-2;G3V582;H0YJ30;G3V4R0;G3V355;H0YJR5;G3V4D2	Gephyrin;Molybdopterin adenylyltransferase;Molybdopterin molybdenumtransferase	GPHN	314830000	273930000	223520000	287040000	260780000	237350000	280580000	266680000	250680000	235350000	129690000	175170000
F5H081;I3L2R4;P14672-2;P14672	Solute carrier family 2, facilitated glucose transporter member 4	SLC2A4	12056000	8921600	12092000	10665000	11716000	10757000	18346000	14909000	10495000	0	0	7735500
F5H0F9;Q9UJX4;Q9UJX4-3;F5GY68;H0YFB5;F5H0N1;Q9UJX4-2;F5H3S5;F5GZ05	Anaphase-promoting complex subunit 5	ANAPC5	266750000	244270000	225840000	264690000	233410000	236210000	243950000	258850000	275590000	262840000	371580000	248560000
F5H0M7;Q2M296-4;Q2M296-2;Q2M296-3;Q2M296;H3BSD1;H3BQU0	Methenyltetrahydrofolate synthase domain-containing protein	MTHFSD	42701000	36941000	37063000	32210000	19633000	22272000	33607000	41129000	41106000	36838000	43517000	36408000
F5H0R1;Q9H6E5;C9JBX0;H3BRB1	Speckle targeted PIP5K1A-regulated poly(A) polymerase	TUT1	22393000	25385000	22178000	33036000	32043000	32671000	26279000	28142000	28186000	29824000	14291000	21754000
F5H0U5;Q9NZD2;H0YFS9;F5GZ49	Glycolipid transfer protein	GLTP	187440000	232360000	205680000	297890000	322280000	277180000	186590000	229920000	190100000	264050000	249190000	260300000
F5H148;H3BMT1;Q9NYV6-3;Q9NYV6;Q9NYV6-2;Q9NYV6-4	RNA polymerase I-specific transcription initiation factor RRN3	RRN3	0	37057000	31867000	22570000	32202000	21234000	27054000	25295000	26375000	28895000	0	25021000
F5H1I4;Q8NG08;Q8NG08-2	DNA helicase B	HELB	14632000	12007000	13055000	21154000	22759000	25744000	12553000	14615000	13980000	16730000	14750000	18040000
K7ES92;F5H1R4;K7ES98;K7EM85;Q92619;Q92619-2	Minor histocompatibility protein HA-1;Minor histocompatibility antigen HA-1	HMHA1	12626000	14642000	16361000	0	0	0	15207000	16580000	0	13212000	0	13433000
O75970;O75970-2;O75970-3;O75970-5;F5H1U9;H0YGQ3;B7ZB24;A0A075B6R8;H0YH70;A0A0U1RQT2;A0A2R8Y549;A0A0U1RQR3;F8WDQ8;B4DE90;A0A2R8Y5I3;Q8NI35-5;Q8NI35-3;Q8NI35-2;Q8NI35;Q8NI35-4	Multiple PDZ domain protein	MPDZ	36504000	60798000	32087000	31887000	35926000	21138000	46365000	27590000	40617000	22321000	13743000	25372000
F5H1Z6;Q9Y365;F5H8G1;F5H8H3;F5H0V7;F5GY11;H0YH17;H0YGA9;H0YFF3;F5GWK5;F5H5A8;F5H3G8;H0YGN8;F5GY07	PCTP-like protein	STARD10	177750000	212560000	224700000	190930000	150690000	171990000	217310000	215080000	228920000	125010000	108470000	124010000
Q9Y485;F5H269;E7EMZ0	DmX-like protein 1	DMXL1	89378000	89779000	66216000	89850000	58386000	85945000	91187000	84628000	94105000	93956000	48101000	72269000
F5H2R5;F5H6Q0;F5H3P3;P52566	Rho GDP-dissociation inhibitor 2	ARHGDIB	0	0	0	37009000	45307000	40362000	0	0	0	12166000	11590000	8164000
H0Y5D5;F5H2X7;Q9ULV3-5;Q9ULV3-2;Q9ULV3;Q9BTG3;Q5SYW2;A0A494C0L7;Q9ULV3-3;Q9ULV3-4;A0A0U1RQR2	Cip1-interacting zinc finger protein	CIZ1	21361000	18678000	16513000	32949000	35014000	35591000	19539000	14659000	17746000	14561000	0	10983000
F5H365;Q15436;Q15436-2;G3V2R6;G3V4V1;G3V1W4;G3V3G5;G3V5X8;G3V4Q2;G3V5K1;A0A2R8YF30;A0A2R8Y633;A0A2R8Y7S7	Protein transport protein Sec23A	SEC23A	9485500000	10374000000	9558800000	8772600000	8670400000	9205000000	8924000000	8667000000	9058100000	8523800000	10383000000	8268100000
F5H442;Q99816;Q99816-2	Tumor susceptibility gene 101 protein	TSG101	509230000	523800000	506970000	551200000	516010000	538800000	515370000	522340000	543360000	607510000	836150000	723340000
F5H4N4;Q9NR77	Peroxisomal membrane protein 2	PXMP2	43570000	53584000	62638000	29199000	31628000	14558000	31973000	38174000	27893000	25056000	0	17631000
F5H527;Q76I76;A0A3B3IS79;K7EQZ0;J3KSP5;J3KSQ9;Q76I76-3;Q76I76-4	Protein phosphatase Slingshot homolog 2	SSH2	11067000	18504000	11532000	22350000	22203000	26456000	11599000	10776000	10158000	7097100	11635000	7482700
J3KNB8;F5H538;Q9Y6R4-2;Q9Y6R4;F5H4R1;F5H1X6	Mitogen-activated protein kinase kinase kinase 4	MAP3K4	74515000	63439000	78091000	48450000	40522000	39825000	54561000	64554000	83029000	43611000	0	63199000
F5H5I6;Q12849;H0Y8R1;H0YAK1;Q12849-5;H0YAM1	G-rich sequence factor 1	GRSF1	504570000	432770000	489200000	651120000	630530000	651980000	624770000	627920000	587500000	615330000	861900000	805680000
F5H5P2;P12694;P12694-2;F5GXU9;H0YH31	2-oxoisovalerate dehydrogenase subunit alpha, mitochondrial	BCKDHA	741430000	917900000	884890000	753640000	931830000	850140000	844760000	871390000	942060000	400350000	186390000	434320000
F5H5R8;P18440	Arylamine N-acetyltransferase 1	NAT1	115420000	123090000	88745000	252820000	244640000	243510000	136350000	149170000	140290000	201970000	281970000	129520000
F5H619;Q86XA9;Q86XA9-2;H7C5W6;H0YIW3;H0YHE0;H0YHS5;F8VQQ6;Q86XA9-3	HEAT repeat-containing protein 5A	HEATR5A	2012000000	2179200000	2052000000	2368600000	2339300000	2516800000	1909400000	1965100000	2120600000	2557200000	2782700000	2558000000
F5H6E2;O00159-3;O00159;I3L501	Unconventional myosin-Ic	MYO1C	0	0	0	0	0	0	0	0	0	0	0	38613000
F5H6I7		ATL3	29438000	24737000	32343000	0	59775000	52776000	20305000	28205000	22492000	56857000	39976000	42421000
F5H6T0;Q8TB40-2;Q8TB40	Abhydrolase domain-containing protein 4	ABHD4	20167000	22454000	20109000	20142000	19885000	25883000	10656000	20005000	11747000	15139000	0	0
F5H6Z0;Q00537-2;Q00537	Cyclin-dependent kinase 17	CDK17	65400000	62443000	58125000	155640000	140140000	125060000	63880000	54098000	59386000	122590000	122630000	115450000
F5H702;Q96GC5-3;Q96GC5;F5H8D0	39S ribosomal protein L48, mitochondrial	MRPL48	282190000	247600000	244890000	178620000	180190000	213240000	331660000	270700000	305970000	242540000	366940000	183050000
F5H7D6		TLE3	148870000	171110000	159710000	72924000	0	0	130030000	143910000	144430000	33565000	54525000	0
F5H7W8;Q96C57;E7ENF1;F5H3K2;F5H8B7;G5EA44	Uncharacterized protein C12orf43	C12orf43	173580000	160090000	168350000	184330000	196770000	244210000	187420000	143220000	171820000	153330000	103590000	147190000
F5H8B0;P08709-2;P08709	Coagulation factor VII;Factor VII light chain;Factor VII heavy chain	F7	24785000	31736000	25367000	0	10269000	10570000	31204000	32222000	25240000	0	0	0
F5H8D7;M0QZ96;M0R1U8		XRCC1	0	0	33536000	14223000	0	18973000	27373000	25632000	31271000	0	0	21356000
F5H8F7;Q9UBL3-3;Q9UBL3;Q9UBL3-2;H0YBF6;H0YAQ0	Set1/Ash2 histone methyltransferase complex subunit ASH2	ASH2L	1077900000	1083000000	1140000000	873280000	945210000	888400000	960340000	907510000	1002400000	730710000	775140000	726190000
F5H8H2;Q03426;A0A1B0GWC2;F5GXC0;F5H092;F5H163;A0A0B4J236;F5H368;A0A1W2PS16;A0A1B0GWF3	Mevalonate kinase	MVK	761950000	926400000	825160000	269170000	338020000	354470000	740590000	752090000	863590000	294970000	210030000	238400000
H0YDW9;Q5JQZ9;F6QTA4;Q9BWU1-2;Q9BWU1	Cyclin-dependent kinase 19	CDK19	27815000	16802000	21048000	14972000	8766700	10621000	19792000	36879000	25393000	0	19328000	15250000
F6RY50;Q96FS4	Signal-induced proliferation-associated protein 1	SIPA1	0	0	0	0	788900000	0	0	0	0	0	36219000	0
F6SFZ6;Q99571;Q99571-2;Q99571-3;H0YF70;F5H1M6;F5GZQ9	P2X purinoceptor;P2X purinoceptor 4	P2RX4	79523000	56458000	79507000	308920000	363030000	428100000	82682000	79118000	49252000	176310000	152520000	135800000
Q5SZR4;F6TB26;Q9Y2W6;E9PKN8;Q9Y2W6-3;B7ZAG4	Tudor and KH domain-containing protein	TDRKH	112530000	72703000	104440000	58768000	87194000	89842000	97944000	109270000	73424000	0	0	0
F6VRR5;Q9BY77;Q9BY77-2;F8WCX5;Q8WUT1;Q6R954;F8WEE2	Polymerase delta-interacting protein 3	POLDIP3	1612700000	1148900000	1520600000	1352600000	1481800000	1444700000	949660000	1585600000	1191300000	1480900000	1070300000	1458500000
F6WQW2;C9JXG8;C9JGV6;C9JDM3;C9JIC6		RANBP1	0	0	0	0	27641000	24856000	21238000	26478000	34039000	32141000	0	0
Q9Y6D0;F6XHT0;F8WAX7	Selenoprotein K	SELK	0	0	0	4042400	2093000	1959500	0	0	0	0	0	1540500
O00220;F8U8C0;E5RFH1	Tumor necrosis factor receptor superfamily member 10A	TNFRSF10A	34167000	38076000	39107000	89944000	91471000	64089000	49374000	33140000	25749000	43540000	100400000	0
F8VYY5;F8VNT6;Q6Y2X3	DnaJ homolog subfamily C member 14	DNAJC14	0	0	3154700	2990300	0	0	4786100	0	2305100	0	0	0
F8VNY5;Q9P031	Thyroid transcription factor 1-associated protein 26	CCDC59	90052000	74469000	80140000	156110000	105300000	173200000	67948000	94167000	94853000	215180000	104480000	166230000
F8VPE9;O75908-4;O75908-3;O75908-2;O75908	Sterol O-acyltransferase 2	SOAT2	48209000	0	57112000	0	0	0	0	42251000	0	0	0	0
F8VQW0;F8VX73;F8VPI1;F8W201;F8W086;F8VR05;F8VQQ5;F8VSI7;F8VVJ4;P55061;F8W1G3;P55061-2;A0A0G2JKZ4;F8VY06	Bax inhibitor 1	TMBIM6	126090000	51592000	131480000	469980000	459520000	499750000	52999000	65304000	48614000	246710000	184880000	225140000
F8VQD4;Q8TAD7	Overexpressed in colon carcinoma 1 protein	C12orf75;OCC1	12637000	9544400	8538900	9776900	0	0	0	0	0	5139600	0	5291600
Q9BSB4;F8VQD9;F8VVA0	Autophagy-related protein 101	ATG101	65960000	69347000	92393000	49558000	54969000	53809000	59030000	61638000	65073000	67642000	78751000	44721000
F8VQR7;Q16527;F8VW96	Cysteine and glycine-rich protein 2	CSRP2	126350000	143920000	116610000	70085000	100390000	99212000	137100000	135790000	151990000	94102000	94049000	103050000
F8VQZ7;P50579-2	Methionine aminopeptidase 2	METAP2	30515000	33272000	36557000	21778000	0	15943000	37463000	32774000	32941000	11287000	0	13103000
F8VRH0		PCBP2	0	0	0	0	0	0	0	0	0	0	0	0
F8VSL3;P25208	Nuclear transcription factor Y subunit beta	NFYB	55327000	52965000	58772000	34055000	45293000	52136000	68993000	47248000	59932000	63232000	114640000	58307000
J3KPG5;F8VU39;Q9UIF9-2;Q9UIF9-3;Q9UIF9;A0A0C4DGI9;H0YHL2;H0YII3;H0YHQ7	Bromodomain adjacent to zinc finger domain protein 2A	BAZ2A	418010000	270850000	406410000	583240000	507100000	531660000	242990000	409510000	307370000	576670000	399940000	571410000
F8VU56;Q16827-4;Q16827-3;Q16827-2;Q16827;P23467-4;P23467-2;P23467;P23467-3	Protein-tyrosine-phosphatase;Receptor-type tyrosine-protein phosphatase O;Receptor-type tyrosine-protein phosphatase beta	PTPRB;PTPRO	37836000	36111000	35230000	22784000	0	0	35676000	32749000	29176000	24215000	0	0
F8VU90;Q9NYL4-2;Q9NYL4;E9PAR0;H0YHM7	Peptidyl-prolyl cis-trans isomerase;Peptidyl-prolyl cis-trans isomerase FKBP11	FKBP11	3323200000	2030900000	3990700000	1927700000	1731500000	1824300000	2193700000	4000900000	2621200000	1824600000	2160500000	1640700000
F8VUA2;Q9HD42;F8VVT7;F5H875	Charged multivesicular body protein 1a	CHMP1A	114880000	117110000	100720000	83363000	67063000	57675000	98946000	91041000	113010000	106400000	56684000	83176000
Q9NZN8;F8VV52;F8VUB4;Q9NZN8-4;Q9NZN8-2;Q9NZN8-5;F8VP97;F8W145;F8VRS8;Q9NZN8-3;F8VQD8;F8VQF4;A0A087X050;F8VVY1;F8VX63;H0YI11;H0YH84;F8VWH8;H0YI80;H0YHT8	CCR4-NOT transcription complex subunit 2	CNOT2	658080000	654440000	656000000	583760000	616160000	691030000	628840000	617430000	613200000	540310000	658310000	687680000
F8VUJ3;Q8N4A0;Q8N4A0-2	Polypeptide N-acetylgalactosaminyltransferase;Polypeptide N-acetylgalactosaminyltransferase 4	POC1B-GALNT4;GALNT4	137350000	48688000	231680000	357380000	472560000	470990000	147320000	156020000	104280000	176080000	103600000	219540000
F8VV56;F8W022;F8VWK8;P08962-3;P08962-2;P08962;F8VNT9	Tetraspanin;CD63 antigen	CD63	225900000	221920000	232610000	378570000	544310000	584650000	246730000	260730000	254940000	187020000	293290000	209900000
F8VVA7;P61923;P61923-4;F8W651;F8VYZ4;P61923-5;P61923-3;F8VYK5;F8VXB1;F8W156;P61923-2;F8VUC5;F8VXR1;F8VYE0	Coatomer subunit zeta-1	COPZ1	2288000000	1907600000	2069700000	2497800000	2762900000	3160200000	1909400000	2387600000	2114100000	2404600000	2953300000	2364000000
H0YI34;F8VVB6;Q99435-4;Q99435;Q99435-2;Q99435-3	Protein kinase C-binding protein NELL2	NELL2	0	0	0	0	0	0	26508000	23846000	0	0	0	0
Q5JRU2;F8VVS7;P55211-4;P55211;P55211-2;A0A087WX72;H0Y3S8;Q5JRU8;P55211-3	Caspase;Caspase-9;Caspase-9 subunit p35;Caspase-9 subunit p10	CASP9	76639000	91850000	96219000	84396000	106440000	91376000	104080000	78071000	69372000	75341000	70230000	0
Q9H2H9;F8VX04;F8VX12	Sodium-coupled neutral amino acid transporter 1	SLC38A1	300510000	256760000	261280000	262730000	222890000	257320000	412670000	390410000	359130000	271880000	375560000	285850000
H0YIQ8;F8VXI8;F8VX10;Q9H9L4;F8VP38;F8VRX7;H0YHR2;Q9H9L4-4	KAT8 regulatory NSL complex subunit 2	KANSL2	4860200	6291200	6433700	16414000	4625900	6705200	10518000	5172400	5777100	6137300	5627200	6099100
F8VXG7;Q99590-2;Q99590;A0A0A0MTP7;A0A087WTB7	Protein SCAF11	SCAF11	267330000	278340000	310830000	425190000	365500000	434180000	261230000	280830000	255580000	227890000	197710000	248720000
F8VXY3;P00973-2;P00973-4;P00973;P00973-3;H0YI20;F8VUC8;F8VPW7;H0YIB8	2-5-oligoadenylate synthase 1	OAS1	0	0	29708000	87921000	89037000	82755000	29724000	30384000	23076000	209350000	178130000	232300000
F8VYE8;P36873;P36873-2;F8VR82;F8W0W8;A0A087WYY5;F5H1L6;F5H037;F8WE71;H0Y3Y6;F8W1A0	Serine/threonine-protein phosphatase;Serine/threonine-protein phosphatase PP1-gamma catalytic subunit	PPP1CC	311320000	294790000	311220000	340370000	301080000	363260000	299040000	313010000	299040000	301780000	239530000	240080000
Q6P1Q0-7;Q6P1Q0;F8VZA2;Q6P1Q0-2;F8VVQ3;Q6P1Q0-4;F8VP71;F8W0R0;H0YIV5;F8W1Z2;F8VPY5;F8VS60;H0YHF4;F8VTR1;F8VQE7;F8W6J0;F8VR33;F8VXQ4;Q6P1Q0-3;Q6P1Q0-6;Q6P1Q0-5;F8WCD9	LETM1 domain-containing protein 1	LETMD1	90867000	74564000	104500000	116090000	105380000	91402000	82201000	138830000	85500000	197270000	38069000	143260000
F8VZX2;H3BRU6;F8W0G4;F8VXH9;F8W1G6;J3QT27;P57721-2;P57721-3;H3BND9;F8VTZ0;H3BSP4		PCBP2	118610000	124570000	116720000	87000000	104220000	0	152630000	162370000	147880000	173560000	140380000	131460000
F8W0P7		ATP5B	0	0	0	0	0	0	13724000	0	12917000	16676000	0	15655000
F8W0Q9;Q8NEY8-9;Q8NEY8-8;Q8NEY8-2;Q8NEY8-6;F8WF16;B7Z8L1;F8VPY7;F8VWU8;F8VRK2;Q8NEY8-5;F8VXV7;REV__K7EN69	Periphilin-1	PPHLN1	241810000	234450000	199420000	186660000	196640000	196100000	282660000	234000000	287030000	243760000	151190000	186220000
F8W1A4;P54819-2;P54819;P54819-5;F8VY04;P54819-6;P54819-3;P54819-4;F8VZG5;G3V213;F8VPP1	Adenylate kinase 2, mitochondrial;Adenylate kinase 2, mitochondrial;Adenylate kinase 2, mitochondrial, N-terminally processed	AK2	6247400000	5701000000	5968800000	9122700000	9783700000	9533900000	5498300000	5335200000	5442100000	7268600000	8216300000	7129500000
F8W1F5;Q8IVF7;Q8IVF7-2;Q8IVF7-3	Formin-like protein 3	FMNL3	12372000	11875000	10778000	17426000	19196000	56765000	9099700	9594000	9765800	8587200	0	8594900
F8W1T6;Q15434;F8VV01;A0A1W2PQV1;F8VQS9;F5H5C8	RNA-binding motif, single-stranded-interacting protein 2	RBMS2	0	73934000	0	68651000	83098000	63777000	0	0	21657000	62664000	64171000	54254000
F8W543;H0YH88;B7Z4K9		NAP1L1	0	0	0	0	0	0	25242000	47596000	43316000	0	78120000	0
F8W6A0;Q8NEY8-3	Periphilin-1	PPHLN1	83736000	73303000	86243000	0	0	0	51907000	72547000	56256000	0	0	0
F8W6N3;Q92560;C9J7L9;H0Y8E8	Ubiquitin carboxyl-terminal hydrolase;Ubiquitin carboxyl-terminal hydrolase BAP1	BAP1	16381000	14361000	12625000	20097000	14076000	11465000	16895000	0	16234000	14254000	21374000	0
Q96A26;F8W7Q4;E9PH05	Protein FAM162A	FAM162A	2475500000	1602400000	2810800000	2135400000	2218500000	2009500000	2268300000	2725800000	2166900000	1062900000	1483100000	1116300000
F8W876;P48740-3;P48740-4;P48740;P48740-2	Mannan-binding lectin serine protease 1;Mannan-binding lectin serine protease 1 heavy chain;Mannan-binding lectin serine protease 1 light chain	MASP1	0	0	0	0	0	0	0	0	0	0	0	0
F8W8C2;Q9HBM0;F2Z3A6;Q9HBM0-2	Vezatin	VEZT	37385000	26131000	46058000	84198000	77772000	98982000	54793000	59782000	49178000	90130000	83066000	81100000
F8W8D3;Q14493;H7C4H8;H0YAE8;E7EUV9;Q14493-2	Histone RNA hairpin-binding protein	SLBP	92948000	88054000	85185000	48657000	56808000	52814000	38128000	149500000	42730000	54449000	33860000	19298000
F8W8I6;P31483;P31483-3;E5RGV5;E5RG67;F8WE16	Nucleolysin TIA-1 isoform p40	TIA1	909630000	1131900000	871590000	779690000	525710000	715750000	844700000	807680000	892090000	745490000	693060000	830340000
F8W930;Q9Y6M1-1;Q9Y6M1;Q9Y6M1-5;Q9Y6M1-6;Q9Y6M1-3;Q9Y6M1-4	Insulin-like growth factor 2 mRNA-binding protein 2	IGF2BP2	4455300000	4381600000	4457100000	6973400000	6963800000	5672400000	3790100000	3734100000	3920200000	4346200000	4005100000	3295700000
F8W9F9;H0Y7T5;Q9Y3S1-2;Q9Y3S1-4;Q9Y3S1;A6PVV2;Q9Y3S1-3;H0Y7J9;H0Y493;H0Y7R3;E9PCD1	Serine/threonine-protein kinase WNK2	WNK2	60991000	63393000	76882000	60730000	56142000	68456000	65398000	74983000	74477000	0	66297000	0
F8W9U3;Q96IU4;B4DQI4;Q96IU4-2	Alpha/beta hydrolase domain-containing protein 14B	ABHD14B	504490000	728150000	696910000	545860000	637400000	578110000	828420000	855300000	777130000	995190000	1167900000	638760000
Q567U6;F8W9X7;H7C050	Coiled-coil domain-containing protein 93	CCDC93	82491000	67753000	97394000	98136000	123090000	87462000	135630000	112370000	123150000	116030000	0	66482000
F8WA11;Q7Z460-2;Q7Z460-4;Q7Z460-5;Q7Z460-3;Q7Z460;H0Y5T1;C9JP76;C9J151	CLIP-associating protein 1	CLASP1	900170000	832450000	952010000	878840000	1008500000	950890000	763830000	836810000	768950000	1037300000	815360000	1013400000
F8WA39;Q13613;Q13613-2;Q8NEC6;H0YDX3;E9PIH9;E9PPP8;F8W764;F8W8S8;H7BZJ1;H7C406	Myotubularin-related protein 1	MTMR1	309500000	375230000	352600000	288790000	255670000	297130000	364790000	360410000	375950000	222340000	205980000	278520000
Q9NUA8;F8WAI8;A0A3B3IRZ6	Zinc finger and BTB domain-containing protein 40	ZBTB40	0	0	0	0	0	0	20717000	17888000	18086000	20471000	0	17341000
F8WAJ0;Q9H8H2;Q9H8H2-2;Q9H8H2-4;Q9H8H2-3	Probable ATP-dependent RNA helicase DDX31	DDX31	81531000	61409000	76230000	84585000	84862000	128430000	66304000	108720000	85931000	88548000	91469000	110910000
F8WBA3;Q15139;A0A494C196;F8VZ98;A0A494C0Q1	Serine/threonine-protein kinase;Serine/threonine-protein kinase D1	PRKD1	0	35855000	24323000	0	20586000	0	0	0	0	0	0	0
F8WBE0;Q8IYA6	Cytoskeleton-associated protein 2-like	CKAP2L	0	0	0	0	0	0	0	0	0	0	0	0
J3QRU4;F8WCA0;L7N2F9;P63027;K7ENK9;K7EKX0;F5GZV7;P23763-2;P23763-3;P23763	Vesicle-associated membrane protein 2	VAMP2;VAMP3	44489000	58795000	46808000	39676000	40734000	50009000	42893000	58553000	42000000	77649000	48607000	33177000
F8WCD0;Q8NC42	E3 ubiquitin-protein ligase RNF149	RNF149	64004000	52099000	45015000	108010000	130530000	131170000	71787000	66420000	61103000	104340000	61535000	71315000
F8WCF6;P59998;P59998-3;F8WDD7;H7C0A3;A0A0A6YYG9;P59998-2;R4GN08;P59998-4;F8WE39;F8WDW3	Actin-related protein 2/3 complex subunit 4	ARPC4-TTLL3;ARPC4	3885100000	3781500000	4010500000	4457500000	4825100000	4779000000	4087500000	3810000000	4090100000	6243900000	5925800000	5372500000
F8WF93;H7BZZ2;F8WE30;H7C0X4;Q92685	Dol-P-Man:Man(5)GlcNAc(2)-PP-Dol alpha-1,3-mannosyltransferase	ALG3	3052400	2809500	2715000	0	0	0	0	0	0	0	0	0
F8WE49;Q9NS91;C9J0Q4;F8WFA6	E3 ubiquitin-protein ligase RAD18	RAD18	60957000	49301000	59504000	10091000	0	53641000	104490000	50717000	59301000	24410000	0	34477000
F8WEC0;Q9H3L0	Methylmalonic aciduria and homocystinuria type D protein, mitochondrial	MMADHC	0	19017000	0	0	0	0	0	0	0	0	0	40543000
G1UD79;Q7Z309-4;Q7Z309;Q7Z309-2;Q7Z309-3;Q7Z309-5	Protein FAM122B	SPACIA2;FAM122B	20205000	22177000	32872000	24196000	32303000	19217000	14257000	14441000	0	21744000	0	18507000
G3V0I5;P49821-2;P49821;B4DE93;E9PMX3;E9PQP1;E9PPR0;E9PPS5;H0YE81;E9PLC6;E9PJL9;H0YD04;E9PPD6	NADH dehydrogenase [ubiquinone] flavoprotein 1, mitochondrial	NDUFV1	3980400000	3985600000	4086600000	2354800000	2199100000	2221800000	3944000000	3730500000	3959500000	2333000000	2606600000	2017500000
G3V167;Q9UGN5-2;Q9UGN5;H0YH02	Poly [ADP-ribose] polymerase 2	PARP2	23079000	31201000	13624000	0	0	0	20900000	0	20730000	12721000	24080000	14659000
G3V1D3;G3V180;Q9NY33;Q9NY33-4;Q9NY33-2;E9PQ14;E9PPK9;E9PKK8;E9PQF2;E9PNX5	Dipeptidyl peptidase 3	DPP3	10646000000	10960000000	10904000000	8321800000	9119800000	8587900000	10166000000	10549000000	11130000000	9124700000	8805300000	8787700000
G3V1A6;P57764;E9PIB2;E9PQ48;E9PNZ0;E9PQR9;H0YDB0	Gasdermin-D	GSDMD	499990000	629110000	457610000	752200000	777490000	738570000	647960000	550590000	612410000	664460000	810040000	736510000
G3V1L9;Q07157	Tight junction protein ZO-1	TJP1	1984400000	2031000000	1968000000	3256100000	2997300000	2880800000	2004100000	2049600000	2151600000	2416900000	2273000000	2298700000
G3V1M7;K7EMF8		ACADVL	11976000	10326000	11661000	5835500	6062700	6377100	13860000	12430000	13100000	12057000	0	18852000
G3V1N2;P69905	Hemoglobin subunit alpha	HBA2;HBA1	0	0	0	1001000000	1183300000	1168200000	0	6985200	0	290450000	342880000	330950000
Q86XJ1;G3V1N3;H0YIT6	GAS2-like protein 3	GAS2L3	13806000	10477000	250200000	0	0	797810	1758600	23962000	2407100	0	0	1110700
G3V1P3;Q969J3;Q969J3-2	Loss of heterozygosity 12 chromosomal region 1 protein	LOH12CR1	244090000	209620000	210460000	235990000	238640000	225520000	194060000	159880000	185540000	221290000	200140000	195750000
G3V1S3;Q6ZUT9;Q6ZUT9-2;H0YGE5;B4DFB6;Q6ZUT9-3;Q6ZUT9-4;Q6IQ26-2;Q6IQ26	DENN domain-containing protein 5B	DENND5B	23194000	23551000	34632000	37050000	0	0	30885000	21680000	23588000	30886000	15553000	0
G3V5S9;G3V1S4;Q9Y324;G3V2M5	rRNA-processing protein FCF1 homolog	FCF1	110300000	114910000	113200000	108280000	109960000	107710000	81838000	101160000	94807000	67581000	83320000	115180000
Q8TBF4;G3V1V1;F8VXY6	Zinc finger CCHC-type and RNA-binding motif-containing protein 1	ZCRB1	33665000	46448000	35731000	46483000	43138000	45442000	37269000	31741000	35791000	36844000	27394000	36312000
Q9ULS5;G3V207;F8VQF2	Transmembrane and coiled-coil domains protein 3	TMCC3	95190000	49568000	85764000	101100000	161000000	121030000	67098000	161520000	79308000	235520000	137490000	306010000
G3V5D6;G3V2M2;Q9BQ24;Q9BQ24-2	Zinc finger FYVE domain-containing protein 21	ZFYVE21	16129000	0	0	0	0	0	0	0	0	0	0	0
G3V2Q1;P07910;G3V576;G3V555;G3V575	Heterogeneous nuclear ribonucleoproteins C1/C2	HNRNPC	466440000	426380000	364710000	470730000	430640000	503270000	417540000	435900000	394940000	237600000	447370000	327370000
G3V2U7;P07311;G3V3F8;G3V597;P07311-2	Acylphosphatase;Acylphosphatase-1	ACYP1	99199000	98891000	92646000	102120000	122920000	121470000	39731000	38998000	48156000	54224000	52385000	65514000
G3V2W1;Q9UK55	Protein Z-dependent protease inhibitor	SERPINA10	54990000	52654000	57609000	0	51177000	0	31219000	40162000	40907000	0	0	0
G3V325;C9JJT5;C9JU26;P56134-4;P56134-2;C9JGL8;O75127	ATP synthase subunit f, mitochondrial	ATP5J2-PTCD1;ATP5J2	22581000	17574000	0	8409400	13269000	0	19251000	17706000	17857000	10176000	12735000	11566000
G3V3G9;Q5TAQ9;V9GY54;H0YDY4;Q5TAQ8;V9GZ39;V9GYZ9	DDB1- and CUL4-associated factor 8	DCAF8	550400000	612570000	557720000	945250000	807090000	806630000	523000000	475580000	528120000	673770000	650760000	657130000
G3V3H3;Q07866-6;G3V5R9;F8W6L3;E7EVH7;G5E9S8;G3V2E7;Q07866-8;Q07866;Q07866-3;Q07866-7;Q07866-5;Q07866-10;Q07866-4;Q07866-9;Q07866-2;G3V2P7;H0YG16;H0YJL0;H0YJU9;H0YJT3;H0YGB8	Kinesin light chain 1	KLC1	627550000	647950000	572510000	595310000	652170000	633430000	559030000	488700000	548870000	572220000	502690000	593800000
G3V3U8;Q9Y2U9;G3V2H2;Q9Y2U9-2	Kelch domain-containing protein 2	KLHDC2	27961000	45376000	24857000	1952000	2481000	1927100	27168000	25958000	26046000	5377800	2983800	4467000
G3V4P7;G3V5J6;G3V3X7;Q9Y587-3;Q9Y587;Q9Y587-4;Q9Y587-2	AP-4 complex subunit sigma-1	AP4S1	21395000	31296000	27281000	18112000	15278000	15709000	22349000	27727000	29124000	39006000	29184000	32044000
G3V4B8;Q96FK6	WD repeat-containing protein 89	WDR89	17893000	17476000	23126000	15431000	0	0	20045000	21960000	16944000	19018000	0	22781000
G3V4C7		WARS	0	0	0	0	28605000	0	0	0	0	0	0	14579000
G3V4E1;P23743;H0YJE7;H0YJH4	Diacylglycerol kinase;Diacylglycerol kinase alpha	DGKA	0	0	0	0	31517000	25126000	0	0	0	0	0	12612000
G3V4K3;Q9H9C1-2;Q9H9C1;G3V549	Spermatogenesis-defective protein 39 homolog	VIPAS39	157250000	159120000	144190000	150930000	155370000	164560000	127520000	150630000	165680000	170220000	192640000	164980000
H0YJ95;G3V4Z6;Q9UM01	Y+L amino acid transporter 1	SLC7A7	17388000	13624000	0	25725000	24071000	28649000	19807000	22255000	20952000	54730000	0	55197000
G3V529;Q9GZR7;Q9GZR7-2;F5GYL3;A0A087WXU8;A0A1W2PRR2	ATP-dependent RNA helicase DDX24	DDX24	908240000	535230000	938600000	986160000	996600000	1009500000	474620000	836640000	524770000	1080400000	955190000	1010200000
G3V583;Q8N128;Q8N128-2;G3V3Z5	Protein FAM177A1	FAM177A1	26296000	15907000	19535000	115940000	200540000	163540000	41807000	23685000	24170000	35607000	9919600	28760000
G3V5L1;P61244-2;P61244;G3V570;Q6V3B1;G3V563;G3V2R5;P61244-3;P61244-4	Protein max	MAX	43048000	45161000	28602000	39695000	18037000	20070000	0	27956000	0	26685000	24400000	0
G3V5N8;Q9HBF4-2;Q9HBF4-3;Q9HBF4	Zinc finger FYVE domain-containing protein 1	ZFYVE1	23574000	24174000	26860000	32439000	29492000	22541000	22678000	26106000	25814000	22643000	0	16445000
G3V5T9;P24941-2;P24941;E7ESI2;G3V317;K7ELV5;Q00526	Cyclin-dependent kinase 2	CDK2	569410000	522420000	596160000	381340000	477870000	348170000	537460000	553170000	555340000	502440000	489710000	561130000
G3V5X7;Q99973-2;Q99973;G3V2A4;G3V470;H0YIZ2;H0YIY9;H0YJ53;H0YJF6;G3V591	Telomerase protein component 1	TEP1	24164000	6520800	0	148280000	318400000	418090000	26761000	34240000	10431000	208320000	71521000	55002000
G3XAC1;Q9BXS9-7;Q9BXS9-2;Q9BXS9-3;Q9BXS9;A0A0C4DFT5;Q9BXS9-5;Q9BXS9-4;Q9BXS9-6;F8W9I8;C9J6Y3;C9JKR6	Solute carrier family 26 member 6	SLC26A6	120760000	104090000	95387000	170190000	194190000	192100000	109150000	117220000	132660000	179790000	193450000	123800000
G3XAD2;Q9BYC5-3;Q9BYC5	Alpha-(1,6)-fucosyltransferase	FUT8	4405400	3289900	3893700	3832900	2670000	2609000	3457800	6447200	3389000	0	0	4924400
G3XAG1;Q96ME7-3;Q96ME7;Q96ME7-2	Zinc finger protein 512	ZNF512	586130000	308320000	591620000	994210000	867070000	906590000	169070000	563470000	293900000	803190000	376520000	604980000
G3XAI2;P07942;E7EPA6;E9PCS6;C9J296	Laminin subunit beta-1	LAMB1	1692400000	1740900000	1458300000	2131600000	2018600000	2245300000	1631400000	1570000000	1630700000	1546300000	1536100000	1800400000
G3XAI9;Q5BKY9;Q8N9E0;Q5BKY9-2	Protein FAM133B;Protein FAM133A	FAM133B;FAM133A	27353000	29713000	0	20476000	18553000	0	35005000	34019000	30865000	29525000	24435000	0
G3XAN4;Q15629-2;Q15629	Translocating chain-associated membrane protein 1	TRAM1	518870000	286910000	554790000	586430000	664120000	553870000	262330000	568020000	310680000	802390000	757570000	858480000
G5E972		TMPO	6165100	0	5114300	7862500	5315700	6858100	3718500	4407900	0	11673000	4732900	7159900
G5E975;Q12824-2;A0A2R8YEE8;A0A0U1RQQ2;B5MCL5	SWI/SNF-related matrix-associated actin-dependent regulator of chromatin subfamily B member 1	SMARCB1	0	0	0	64847000	57210000	0	0	0	0	0	70587000	0
G5E994;Q5VW38-2;Q5VW38;Q5VW38-3;U3KQD2	Protein GPR107	GPR107	248320000	192100000	222820000	472270000	519960000	471400000	240720000	344440000	260010000	412990000	341130000	271560000
P51784;G5E9A6;Q5JXD3	Ubiquitin carboxyl-terminal hydrolase 11;Ubiquitin carboxyl-terminal hydrolase	USP11	82881000	99289000	95381000	184850000	219930000	147650000	116900000	107070000	110380000	149330000	122280000	171780000
G5E9A7;Q09019	Dystrophia myotonica WD repeat-containing protein	DMWD	10465000	8875300	8270400	11146000	8192900	12175000	8524800	8964700	7604700	9285700	9030300	12060000
I3L4X3;G5E9C2;Q15653-2;Q15653;I3L1A4	NF-kappa-B inhibitor beta	NFKBIB	47506000	74492000	41132000	69105000	54011000	52157000	57416000	30665000	66165000	45679000	47723000	48619000
G5E9C8;Q07889;Q07889-2	Son of sevenless homolog 1	SOS1	74476000	80167000	72369000	74396000	83502000	54853000	60406000	81725000	88815000	94722000	84986000	99110000
G5E9W7;G5E9V5;P82650;H7C5L9;H7C5F2;H7C5H3;P82650-2;C9J5D8	28S ribosomal protein S22, mitochondrial	MRPS22	590060000	532290000	697420000	428380000	445070000	378280000	662470000	596460000	680150000	462540000	567840000	407080000
G5E9W2;Q9P2E5;Q9P2E5-2	Chondroitin sulfate glucuronyltransferase	CHPF2	0	14248000	13619000	0	13374000	11348000	14195000	23621000	18969000	0	0	0
G5E9Z4;Q8TCG2	Phosphatidylinositol 4-kinase type 2-beta	PI4K2B	253960000	309650000	263130000	221500000	208810000	122810000	355670000	264840000	229710000	234690000	268620000	215740000
G5EA30;Q92879-4;Q92879-6;Q92879;Q92879-3;Q92879-2;Q92879-5;E9PSH0;E9PKU1;E9PQK4;F5H0D8;F5H4Y5;A0A0J9YXJ0;A0A1B0GU44;A0A0J9YX66;Q5VZZ6;E9PC62;A0A1B0GUN8;O95319-5;V9GYD9;E9PKA1;O95319-3;O95319-4;O95319;O95319-2;F5H3J7	CUGBP Elav-like family member 1	CELF1	1712500000	1846800000	1615300000	2025400000	1977800000	1979600000	1916800000	1732700000	1891500000	2110000000	1730000000	1951900000
G8JLB3;Q9Y606-2;Q9Y606;F5H1S9;F5GY32;F5GXL3;F5H168;F8W9U5;F5H1B2	tRNA pseudouridine synthase;tRNA pseudouridine synthase A, mitochondrial	PUS1	360300000	427880000	329140000	310630000	289760000	331980000	534510000	438040000	529790000	379890000	386420000	305270000
P31943;G8JLB6;E9PCY7;D6RBM0;D6RIU0;H0YB39;E5RGV0;D6RFM3;D6RIT2;D6RJ04;D6RAM1;D6R9T0;D6RIH9;D6RDU3;H0YBD7;E7EN40;E5RGH4;D6RDL0;H0YBG7;D6RF17;D6R9D3;H0YAQ2;E5RJ94	Heterogeneous nuclear ribonucleoprotein H;Heterogeneous nuclear ribonucleoprotein H, N-terminally processed	HNRNPH1	28282000000	29251000000	28607000000	26412000000	25892000000	24377000000	30251000000	29106000000	30806000000	27417000000	30565000000	25598000000
G8JLP4;Q9Y4F3-3;Q9Y4F3-4;Q9Y4F3-5;Q9Y4F3;F8VVB8;F8VRS5;Q9Y4F3-6	Meiosis arrest female protein 1	KIAA0430	22995000	25481000	24205000	34598000	22230000	38673000	24611000	37563000	33559000	26701000	0	16416000
G8JLQ3;P78537-2;P78537;F8W099;F8W606;A0A087WSV2;F8W036;F8VP73	Biogenesis of lysosome-related organelles complex 1 subunit 1	BLOC1S1	85863000	112400000	97619000	108280000	97779000	104810000	113340000	106220000	114960000	120610000	151260000	127720000
X6RLT1;H0UI80;Q8IXH7-4;Q8IXH7	Negative elongation factor C/D	NELFCD;TH1L	288230000	257120000	228240000	256840000	281850000	268090000	230540000	215620000	284900000	309570000	260070000	275500000
H0Y2V6;Q5SW79;Q5SW79-3;Q5SW79-2;E7EWM2;E7EMW0;Q96L14;H0YB92;H0Y4T4;E5RFU8;E5RG47	Centrosomal protein of 170 kDa	CEP170	276420000	282310000	277380000	302490000	262040000	272480000	206450000	286350000	236350000	228220000	159060000	215960000
H0Y334;Q8N7X0-2;Q8N7X0;H0Y333;F8W7W4	Androglobin	ADGB	89914000	40087000	76603000	52372000	0	71196000	46196000	62776000	38837000	88921000	0	50574000
Q5QPK2;H0Y368;O60762;Q5QPJ9	Dolichol-phosphate mannosyltransferase subunit 1	DPM1	939560000	669830000	1101600000	1325500000	1267200000	1310300000	628530000	985860000	671170000	1034000000	980810000	1185200000
H0Y400		DDX39B	0	0	0	0	0	0	20669000	0	0	33928000	0	0
H0Y459		NCOR1	0	0	0	0	0	0	10984000	0	0	0	0	0
H0Y4B0;O43414-3;O43414-2;O43414;F6QUN3;A0A3B3ISV9;F6UGJ8	ERI1 exoribonuclease 3	ERI3	166830000	207750000	207910000	302000000	246570000	259590000	180700000	155200000	159530000	179980000	192700000	274090000
H0Y4E8;Q9Y2K2-7;Q9Y2K2-8;Q9Y2K2	Serine/threonine-protein kinase SIK3	SIK3	0	0	0	0	0	0	0	0	0	0	0	0
H0Y4N1;Q9HAC7-4;Q9HAC7-2;Q9HAC7;Q9HAC7-3	Succinate--hydroxymethylglutarate CoA-transferase	SUGCT	18529000	16674000	18409000	0	0	9579800	26650000	22218000	16403000	0	0	0
H0Y4R5;Q5SNT2-2;Q5SNT2	Transmembrane protein 201	TMEM201	46402000	56025000	58212000	80443000	64672000	103770000	64297000	74553000	112120000	61687000	52651000	113640000
H0Y4Z8;Q3YEC7;Q3YEC7-2;G3V154;F2Z2T0;H0Y7H6;Q3YEC7-4;Q3YEC7-5;Q3YEC7-6;Q3YEC7-3	Rab-like protein 6	RABL6	191140000	196150000	186110000	358530000	335270000	333020000	160710000	177970000	172260000	250110000	295950000	249350000
H0Y507;Q5TCZ1-3;Q5TCZ1;Q5TCZ1-2	SH3 and PX domain-containing protein 2A	SH3PXD2A	273560000	222980000	245590000	178920000	154140000	151550000	136520000	265480000	257630000	161380000	117160000	123820000
H0Y517;H7C1U3;Q5T0F9-3;Q5T0F9-2;Q5T0F9;Q5T0F9-4	Coiled-coil and C2 domain-containing protein 1B	CC2D1B	48516000	52523000	52371000	60710000	68372000	52273000	67674000	67871000	65125000	58090000	71384000	53670000
H0Y5C2;O95260;B4DK25;Q5SQQ1	Arginyl-tRNA--protein transferase 1	ATE1	45853000	62007000	51569000	0	69653000	0	42701000	51484000	51371000	40639000	0	28942000
H0Y621;H0Y5K5;Q9Y282-2;Q9Y282;Q9Y282-3;A0A1W2PPS8	Endoplasmic reticulum-Golgi intermediate compartment protein 3	ERGIC3	140940000	70739000	216980000	189400000	220120000	227720000	106460000	127950000	78677000	72439000	0	54886000
H0Y614;P61960;P61960-2	Ubiquitin-fold modifier 1	UFM1	414770000	346680000	385480000	246290000	272870000	305460000	334300000	442200000	475160000	406800000	301110000	362200000
H0Y626;O95361;K7ENN8;B3KP96;O95361-2	Tripartite motif-containing protein 16	TRIM16	0	4492400	0	5780700	6188900	7782300	0	0	0	0	0	5125700
H0Y6A0		ARFGAP3	24267000	38114000	33558000	39352000	42851000	54786000	24513000	23907000	26766000	24364000	26657000	26969000
H0Y6F5;Q9H4I2;Q9H4I2-2	Zinc fingers and homeoboxes protein 3	ZHX3	32627000	30338000	41048000	0	0	0	31762000	35172000	28864000	0	0	0
H0Y6H0;Q8NB78;Q8NB78-4;Q8NB78-2;Q08EI0	Lysine-specific histone demethylase 1B	KDM1B	29619000	21427000	23836000	0	37277000	0	20049000	28042000	22912000	22403000	0	34693000
H0Y6W0;O95985-3;O95985-2;O95985;H7C4B0;C9JEI7	DNA topoisomerase;DNA topoisomerase 3-beta-1	TOP3B	44627000	46163000	47284000	32650000	16021000	0	46854000	49181000	44166000	38321000	17538000	26902000
H0Y714;Q96G21;E7ENR5;B8ZZ47;B9A008;F8WCN0	U3 small nucleolar ribonucleoprotein protein IMP4	IMP4	435450000	354890000	387720000	263120000	244360000	186850000	303280000	395010000	360010000	286630000	217960000	203100000
H0Y720;Q9UPQ9-1;Q9UPQ9;Q9UPQ9-2	Trinucleotide repeat-containing gene 6B protein	TNRC6B	127300000	186200000	120640000	100280000	105760000	198400000	115910000	104230000	113000000	95829000	47462000	101700000
H0Y7A5;Q9BX10-2;Q9BX10-4;Q9BX10;X6RJ09	GTP-binding protein 2	GTPBP2	0	7897300	0	20408000	22165000	13014000	0	0	0	15592000	27674000	55622000
P0DP25;P0DP24;P0DP23;H0Y7A7;E7ETZ0;E7EMB3;G3V361;Q96HY3;G3V226;F8WBR5;M0QZ52;G3V479;P27482;C9J7T9;P02585		CALM2;CALM1	18815000000	18406000000	17554000000	16134000000	15625000000	15251000000	16821000000	17926000000	19164000000	19594000000	18431000000	15929000000
H0Y7R2;P43005	Amino acid transporter;Excitatory amino acid transporter 3	SLC1A1	0	0	0	0	0	20137000	25213000	0	0	21498000	25662000	0
H0Y870;H0Y861;Q8TDQ4;Q5SSC2;Q9H0R3;H0Y8D0;Q9H0R3-2	Transmembrane protein 222	TMEM222	26886000	0	46247000	44679000	0	40764000	37073000	34337000	31056000	40261000	47045000	0
H0Y886;O43674;E7EWP0;O43674-2;H7C568;A0A087WYD0	NADH dehydrogenase [ubiquinone] 1 beta subcomplex subunit 5, mitochondrial	NDUFB5	378380000	366450000	439280000	218630000	209720000	200810000	487640000	498490000	471610000	302560000	281110000	304410000
H0Y8J2;Q03188;Q03188-2;H0Y9W1	Centromere protein C	CENPC	0	0	59034000	0	0	0	0	33638000	18695000	16680000	0	0
H0Y8U5		CTBP1	0	32238000	44972000	30176000	38399000	34711000	0	39263000	0	0	0	0
H0Y8X4;O43598;O43598-2	2-deoxynucleoside 5-phosphate N-hydrolase 1	DNPH1	679450000	651860000	708410000	472020000	509240000	470160000	708930000	700480000	831640000	614170000	803470000	651870000
H0Y993;P35659;A0A494C028;B4DFG0;H0Y8X0;P35659-2;A0A494C198;D6RDA2;D6R9L5	Protein DEK	DEK	3833300000	3183800000	3845200000	4387800000	4196000000	3962600000	2644500000	2978800000	2866100000	3846600000	3535600000	4054400000
H0Y997;Q96J42-2;Q96J42;D6RBD9;D6RB48	Thioredoxin domain-containing protein 15	TXNDC15	15586000	0	17920000	16898000	19587000	11105000	0	13027000	0	19839000	31526000	0
H0Y9D9;J3KN18;Q7Z5Q1-7;Q7Z5Q1-5;Q7Z5Q1-4;Q7Z5Q1-6;Q7Z5Q1-3;Q7Z5Q1;Q8NE35-2;Q8NE35;Q7Z5Q1-8;Q7Z5Q1-9	Cytoplasmic polyadenylation element-binding protein 2;Cytoplasmic polyadenylation element-binding protein 3	CPEB2;CPEB3	0	0	0	0	0	0	0	0	0	0	0	14944000
H0Y9S9;K7ENU7		PPIP5K2	17616000	16184000	14875000	0	0	0	18934000	23886000	14170000	0	0	0
H0Y9X1;Q96EY4;D6RA57;D6RE67;D6RC31	Translation machinery-associated protein 16	TMA16	920690000	741860000	880420000	794580000	849890000	751610000	577770000	690160000	682360000	940510000	874910000	825040000
H0YAA3;Q9HAD4;Q9HAD4-2;D6RJA5;H0Y9Z3;D6R9M1;D6RH33;D6R9E7;D6RB94;B4DK73;B4DHS8;D6RBY6;D6RE66;H0YAI6;D6RA22	WD repeat-containing protein 41	WDR41	35950000	41914000	30036000	38592000	59270000	51102000	38260000	61186000	40286000	44486000	85140000	36192000
H0YAA8;Q9H204	Mediator of RNA polymerase II transcription subunit 28	MED28	68909000	58628000	61825000	133170000	147600000	122740000	59551000	66168000	56232000	83152000	140060000	100670000
H0YAR2;H0YB86		PABPC1	9918900	0	10301000	0	0	10132000	0	11356000	0	17287000	0	0
H0YAV3;Q86XK2-2;Q86XK2-3;Q86XK2-6;Q86XK2;Q86XK2-5	F-box only protein 11	FBXO11	3121400	3981900	5165400	6569200	3168700	2944400	3820500	5469200	6320500	5911200	0	3889400
H0YAX0;Q8IZN3-2;Q8IZN3	Palmitoyltransferase;Probable palmitoyltransferase ZDHHC14	ZDHHC14	3204700	3604500	3589100	0	0	0	3243600	3264600	3361100	0	0	2264000
H0YBC7;O60238-2;O60238	BCL2/adenovirus E1B 19 kDa protein-interacting protein 3-like	BNIP3L	67429000	50304000	61057000	100020000	98599000	93341000	48480000	52674000	39225000	41039000	33017000	42300000
H0YC42;E5RFR7;H0YC44;P55327-8;U3KQQ8			2592600000	2484700000	2397500000	2153600000	2400500000	2080900000	2689700000	2615000000	2673200000	2983100000	2751600000	2151800000
P16070;P16070-12;H0YD13;P16070-8;P16070-7;P16070-5;P16070-6;P16070-4;P16070-17;P16070-3;P16070-16;P16070-10;P16070-11;P16070-13;P16070-14;P16070-18;H0YCV9;H0Y5E4;P16070-15;P16070-9;H0Y2P0;H0YDW7;E9PKC6;H0YD17;H0YDX6;P16070-19;J3KN83;Q86UZ1;H0YE40	CD44 antigen	CD44	10774000	0	0	62106000	58495000	37795000	0	9121700	0	21456000	0	15166000
H0YDM4		HOOK3	8059400	0	0	10824000	9073700	12886000	0	11588000	0	14070000	14039000	13674000
H0YEB6;O60232;G3V1B8;H0YEK1;E9PN57;E9PK41	Sjoegren syndrome/scleroderma autoantigen 1	SSSCA1	195110000	202040000	179090000	139250000	134680000	185440000	232850000	225920000	281050000	258260000	320460000	242670000
H0YEF7;H0YEH1;H0YD48;H0YE97;H0YEY8		PICALM	118380000	123550000	126550000	130160000	94037000	107500000	131020000	140740000	112450000	150290000	175460000	0
H0YEH2;Q5T1Z4;Q5T1Z8;Q14671-2;Q14671;Q14671-3;Q14671-4;E9PR38;H0YDK8;H0YC97;H0YDC5;E9PMX1;H0YDQ6;E9PM68;E9PL65	Pumilio homolog 1	PUM1	619540000	664900000	553570000	638600000	614230000	495660000	656420000	550790000	623010000	564730000	554410000	566030000
H0YF29;Q6P1X6;Q6P1X6-2;J3KNI2	UPF0598 protein C8orf82	C8orf82	229720000	243410000	230500000	151970000	198220000	0	241610000	190490000	257290000	119300000	110580000	189550000
H0YFD6;P40939;A0A2R8Y4F5;A0A2R8YG21;A0A2R8Y688;P40939-2	Trifunctional enzyme subunit alpha, mitochondrial;Long-chain enoyl-CoA hydratase;Long chain 3-hydroxyacyl-CoA dehydrogenase	HADHA	18031000000	18496000000	18075000000	20116000000	20336000000	21707000000	20528000000	19265000000	18306000000	18879000000	20053000000	19422000000
H0YGS7;H0YG27;Q6PJ69	Tripartite motif-containing protein 65	TRIM65	12732000	15792000	14485000	7090300	12682000	11469000	17118000	16578000	18711000	14798000	0	0
H0YGW8;J3QLE4;Q6P1R4;J3QKP9	tRNA-dihydrouridine(16/17) synthase [NAD(P)(+)]-like	DUS1L	0	16939000	0	0	0	0	0	0	0	0	0	0
H0YH69;Q9HBU6;Q9HBU6-2;H0YFP7	Ethanolamine kinase 1	ETNK1	327460000	263970000	283860000	84331000	31997000	92344000	366450000	401860000	345840000	80137000	49017000	99278000
H0YHD0;Q5PSV4-2;Q5PSV4	Breast cancer metastasis-suppressor 1-like protein	BRMS1L	20896000	18675000	14479000	0	0	12425000	18768000	21925000	24172000	29512000	18562000	0
H0YHE2;Q8WYA0;Q8WYA0-3;H0YIR4	Intraflagellar transport protein 81 homolog	IFT81	0	0	20661000	30696000	34716000	26237000	25518000	17021000	25084000	29591000	0	23253000
Q9H8H3;H0YI09;F8VQX6	Methyltransferase-like protein 7A	METTL7A	1671700000	1383900000	2214400000	543810000	591170000	515130000	1126200000	1640000000	1173200000	340640000	315120000	375010000
H0YID8;Q6UXM1-2;Q6UXM1	Leucine-rich repeats and immunoglobulin-like domains protein 3	LRIG3	0	0	0	4404600	7322600	7316000	1483600	1657100	0	1745500	0	1719300
H0YIN8;Q8IZ07;S4R3D2;F8W150;S4R3U2	Ankyrin repeat domain-containing protein 13A	ANKRD13A	25915000	30244000	37683000	16481000	36419000	30311000	30290000	33476000	32490000	20306000	0	53391000
H0YIV4;P55209;F5H4R6;P55209-2;F8VY35;F8VV59;B7Z9C2;F8W0J6;P55209-3;F8VUX1;F8W118;H0YHC3;F8W020;F8VXI6;F8VRJ2;F8VVB5	Nucleosome assembly protein 1-like 1	NAP1L1	11289000000	12633000000	11024000000	9196000000	9600900000	8855400000	13679000000	12332000000	13505000000	9317000000	10888000000	9532800000
H0YIV9;O43716;J3KMY1;F8VRU3	Glutamyl-tRNA(Gln) amidotransferase subunit C, mitochondrial	GATC	232210000	270400000	232320000	335600000	362600000	205840000	303380000	260210000	281130000	137770000	0	261310000
H0YJ66;Q9Y394-2;Q9Y394;H0YJR8;H0YJE4	Dehydrogenase/reductase SDR family member 7	DHRS7	594490000	382270000	625410000	889110000	963280000	1000500000	406280000	745660000	497970000	1182200000	1011800000	1430000000
H0YJ75;Q13362-2;Q13362-3;Q13362;Q13362-4;Q13362-5;H0YN84;Q96B13;H0YJ49;H0YJU0;G3V2U3	Serine/threonine-protein phosphatase 2A 56 kDa regulatory subunit gamma isoform	PPP2R5C	0	0	13697000	0	18415000	19439000	11571000	0	16932000	0	0	0
H0YJ78;O14678	ATP-binding cassette sub-family D member 4	ABCD4	0	0	0	7941800	6875300	6115100	0	0	0	0	0	0
H0YJH6;P42226;A0A494C0T4;A0A1W2PNW1;P42226-3;P42226-2;G3V5I8;G3V370;G3V5K5;G3V568;H0YIY2;Q5FBW6;G3V2L2;G3V2M3;G3V2H4	Signal transducer and activator of transcription 6	STAT6	302590000	382090000	379310000	493500000	491230000	434520000	451780000	400770000	373940000	531950000	553900000	581030000
H0YJL5;H0YJJ5;Q9UEU0-2;Q9UEU0	Vesicle transport through interaction with t-SNAREs homolog 1B	VTI1B	0	0	0	0	0	0	0	0	0	40211000	0	0
H0YLY3;H0YKR4;H0YNR6;H0YN04;H0YKC9;Q9HA82	Ceramide synthase 4	CERS4	2688200	3403200	2664400	1731300	1143700	1123100	1604400	2989300	2653000	0	0	1399700
H0YKJ9;O60637-3;O60637-2;O60637;H0YMH8	Tetraspanin-3	TSPAN3	8930400	0	0	0	0	0	12220000	0	0	8220500	8811400	0
H0YKT8;H0YKS0;H0YMV3	Proteasome subunit beta type	PSMA4	27684000	39718000	28371000	39122000	34098000	41472000	39950000	39043000	32019000	0	0	50049000
H0YLN5;H0YN78;Q9BV29;Q9BV29-2	Uncharacterized protein C15orf57	C15orf57	35887000	36808000	31261000	35645000	28173000	36470000	48777000	59372000	42438000	0	0	40131000
H0YLU1;O14775-3;O14775-2;O14775	Guanine nucleotide-binding protein subunit beta-5	GNB5	0	0	12589000	0	0	0	10275000	0	0	0	0	0
H0YLX2;Q2KHR2-2;Q2KHR2	DNA-binding protein RFX7	RFX7	10915000	8327900	8446700	6168000	5871700	6166000	10126000	7819400	9197000	5669400	5074900	6044800
H0YLY0		CDC42BPB	0	0	0	0	0	0	0	0	0	0	0	20643000
H0YM15;J3KNL7;Q8NBR6-2;Q8NBR6	Protein FAM63B	FAM63B	0	18182000	9979000	0	0	5878400	0	0	0	0	0	0
H0YM23;O75179-6;O75179-7;O75179-2;O75179;H0YLQ3;O75179-3;A0A1W2PQ15;O75179-5;O75179-4	Ankyrin repeat domain-containing protein 17	ANKRD17	47505000	59626000	57753000	47538000	62064000	58589000	51984000	42813000	43586000	61737000	86659000	44410000
H0YMN5;Q9ULG1	DNA helicase INO80	INO80	20931000	10839000	12654000	36257000	25826000	38328000	0	13572000	0	18703000	13197000	17554000
H0YMP3;H1UBN3;O95067	G2/mitotic-specific cyclin-B2	CCNB2;CCNB2V	20612000	18190000	27772000	0	0	0	18231000	17168000	17899000	0	0	22850000
H0YMV8;Q71UM5;C9JLI6;C9J1C5	40S ribosomal protein S27;40S ribosomal protein S27-like	RPS27L	838930000	762730000	842710000	540820000	527890000	584880000	923590000	897370000	935630000	644960000	629760000	651210000
H0YN26;P39687;H7BZ09;O95626;O43423	Acidic leucine-rich nuclear phosphoprotein 32 family member A	ANP32A	13803000000	14433000000	12551000000	14727000000	14012000000	13276000000	15140000000	14485000000	15207000000	17069000000	14075000000	17843000000
H0YN33;Q9BW66;Q9BW66-3;H0YKY0	Cyclin-dependent kinase 2-interacting protein	CINP	35470000	28697000	38668000	25048000	24116000	20947000	36950000	42479000	38596000	37512000	0	18744000
H0YNG3;P67812-4;P67812;P67812-3;P67812-2;H0YNX5;H0YNA5;H0YKT4	Signal peptidase complex catalytic subunit SEC11;Signal peptidase complex catalytic subunit SEC11A;Signal peptidase I	SEC11A	512180000	331640000	554490000	741010000	660870000	645180000	264150000	483210000	309610000	579140000	763220000	772810000
H0YNH5;Q7L8W6;H0YND7	Diphthine--ammonia ligase	DPH6	33023000	28184000	12070000	37379000	18994000	9776200	31237000	37391000	37960000	42860000	0	51596000
H0YNK8;Q5J8M3-2;Q5J8M3;H0YK61;H0YNK0;H0YLP8;H0YMH5;H0YN63	ER membrane protein complex subunit 4	EMC4	176060000	141420000	175250000	96988000	127240000	182700000	129760000	159730000	125580000	139950000	102370000	173510000
H0YNU5;P54132;A0A3B3IT82;H0YLV8	Bloom syndrome protein	BLM	8411700	8820300	10991000	22694000	24342000	20844000	8335900	9202700	10869000	7798300	0	6710900
H3BLU7;O43488;H7C5H7;A0A499FJT0;Q8NHP1;O95154	Aflatoxin B1 aldehyde reductase member 2	AKR7A2	959430000	1019800000	995820000	652460000	776520000	603220000	1052100000	997680000	1087400000	674620000	712400000	646200000
Q96SB4-3;Q96SB4-4;Q96SB4;H3BLV9;D6RBF8;Q9UPE1-2;Q9UPE1-4;Q9UPE1;Q9UPE1-3;A8MPY5;E7ETV6;A8MPP7;H7C5L6;H7C521;D6RBM8;H0Y932;H7C2I2	SRSF protein kinase 1	SRPK1	663600000	733940000	658890000	414110000	442260000	424550000	754430000	707880000	801320000	529600000	379600000	461860000
H3BLW6;Q5T3F8;H0YCP6;Q5T3F8-3;Q5T3F8-2	CSC1-like protein 2	TMEM63B	543610000	546920000	448450000	1856800000	1845100000	1693100000	405180000	469280000	342310000	1535900000	2487700000	2236300000
H3BM14;H3BM74;Q9Y5A7-2;Q9Y5A7;F8WDB6;C9JRT6;C9J7X7;H7C5N1;H7C5E1;F8WDL9	NEDD8 ultimate buster 1	NUB1	606690000	583790000	569500000	1180100000	1214500000	1199500000	547210000	602090000	555850000	1811100000	1751900000	1580400000
H3BM52;Q9Y2Y0-2;Q9Y2Y0;H3BU49	ADP-ribosylation factor-like protein 2-binding protein	ARL2BP	35371000	37436000	30469000	37934000	24650000	37695000	34255000	27980000	38599000	21732000	45857000	0
H3BM58;Q9Y2B5;Q9Y2B5-2	VPS9 domain-containing protein 1	VPS9D1	0	0	0	2491500	2678100	0	2445500	3890600	3890900	0	0	0
H3BM67;H3BUP2;H3BUN4;O60936;O60936-3;O60936-1;J3QLT7;H3BQJ5	Nucleolar protein 3	NOL3	27217000	21473000	28818000	24018000	24799000	0	38200000	36162000	24144000	0	36005000	25418000
H3BMD8;P56211;P56211-2;H3BQ52;H3BTD3	cAMP-regulated phosphoprotein 19	ARPP19	257580000	250070000	256360000	191800000	187910000	184300000	276040000	248640000	260460000	232030000	234420000	199160000
H3BMF4;Q9H2V7-3;Q9H2V7-2;Q9H2V7;H3BPQ9;H3BR82;Q9H2V7-5;Q9H2V7-4;H3BT44;H3BPT8	Protein spinster homolog 1	SPNS1	66128000	53250000	38415000	25763000	40026000	0	45814000	54100000	55522000	27766000	41146000	0
H3BMJ2;Q6ZRI6-2;Q6ZRI6	Uncharacterized protein C15orf39	C15orf39	20726000	14338000	24619000	22256000	18406000	16290000	22898000	24857000	23979000	45541000	0	20517000
Q15287;H3BTC0;H3BMM9;H3BV80;Q15287-2;Q15287-3;H3BPG5;H3BMS0;H3BNU7;H3BUL0;H3BRK4;H3BTV0;H3BUG0;H3BTR6;H3BP82;H3BNI3;H3BTY0	RNA-binding protein with serine-rich domain 1	RNPS1	831380000	943680000	770770000	1060600000	983060000	987910000	910210000	912340000	1054300000	1227700000	1684800000	1202200000
H3BMV3		HN1L	0	0	47151000	0	0	0	0	0	0	0	0	0
H3BN98;I3L246;H3BV27;H3BT37;I3L303;H3BPJ2;Q15041;Q15041-3;Q15041-2;H3BTX6;H3BS91		RPS15A	1429000000	986130000	1158200000	606210000	546090000	620140000	776710000	1230400000	949790000	1009600000	866460000	748930000
H3BNC9;P08708;H0YN88;A0A075B716;H0YN73;A0A0J9YYC4	40S ribosomal protein S17	RPS17	7657500000	6577800000	7966200000	6272100000	6464900000	6021800000	7617700000	8577700000	7213100000	7999200000	6801400000	6917100000
H3BNE3;H3BR42;H3BST1;Q9UL45	Biogenesis of lysosome-related organelles complex 1 subunit 6	BLOC1S6	0	12648000	0	13207000	15864000	20789000	10890000	0	0	0	0	14947000
H3BUZ7;H3BNH3;H3BR91;Q15572-2;Q15572-6;Q15572	TATA box-binding protein-associated factor RNA polymerase I subunit C	TAF1C	0	0	6512300	0	0	0	0	0	0	16710000	10161000	0
J3KNE2;H3BNM4;Q8NBZ0;I3NI13;I3L270;Q8NBZ0-2	INO80 complex subunit E	INO80E	15676000	0	13855000	13815000	23217000	12724000	14400000	14793000	0	12126000	23926000	20149000
H3BNT2;O75208;H3BPY0;H3BPC6;H3BSJ5;H3BPW3;H3BVA5;H3BRC0;O75208-2	Ubiquinone biosynthesis protein COQ9, mitochondrial	COQ9	206650000	213040000	207600000	200660000	173430000	173910000	228130000	306670000	229270000	129790000	161140000	112720000
H3BNT4;Q99547;H3BSB3;H3BNK8;H3BU96	M-phase phosphoprotein 6	MPHOSPH6	148300000	121840000	104910000	102550000	101610000	114140000	129370000	136190000	121960000	120730000	107290000	116730000
H3BNW8;Q7Z402;Q7Z402-2	Transmembrane channel-like protein;Transmembrane channel-like protein 7	TMC7	0	37615000	23648000	38050000	33105000	50964000	20824000	30110000	0	32810000	0	26705000
H3BP28;Q99807-2;Q99807;H3BTN8;H3BSZ3;H3BS11;I3L1T0	5-demethoxyubiquinone hydroxylase, mitochondrial	COQ7	27494000	21014000	22636000	23808000	22905000	22068000	22067000	22740000	21382000	0	20508000	15233000
H3BPE1;H3BQK9;E9PNZ4;H0Y314;H0Y4F5;H0Y6T5;H0Y7I1		MACF1	3219400000	2895600000	3248100000	3302000000	3415700000	3345500000	2741900000	3064200000	2850400000	2963500000	3412500000	3040200000
H3BPE7;P35637-2;P35637	RNA-binding protein FUS	FUS	7229000000	6367600000	7498700000	7212600000	7536000000	6679200000	5552100000	6742700000	6431700000	6978700000	6007700000	6544800000
H3BPG6;H3BQQ2;H3BR87		ZNF598	20985000	0	0	0	0	0	0	0	19292000	0	0	0
H3BPJ9;O96000;O96000-2;H3BV16	NADH dehydrogenase [ubiquinone] 1 beta subcomplex subunit 10	NDUFB10	1644300000	1338000000	1504300000	912710000	828350000	797710000	1337600000	1450400000	1409300000	1001900000	1033200000	909350000
H3BPK3;Q16775-2;Q16775;H3BPQ4;H3BQW8;Q16775-3;H3BV79	Hydroxyacylglutathione hydrolase, mitochondrial	HAGH	905230000	897060000	890700000	1222500000	1244600000	1123900000	790970000	850060000	838530000	724250000	668410000	652340000
H3BRT4;H3BPS5;H3BT31;Q02556	Interferon regulatory factor 8	IRF8	0	0	0	0	0	0	0	0	0	0	5535700	0
Q9ULP0-6;Q9ULP0-3;Q9ULP0-7;H3BQJ4;Q9ULP0-8;Q9ULP0;Q9ULP0-2;Q9ULP0-4;H3BQ86;B7Z9X4;H3BM40;H3BNE7;H3BRT9;H3BNK4;H3BN97;H3BPH8;H3BNQ1;H3BNX9;H3BPQ3;H3BR92;H3BMR6;H3BN53;H3BU08;Q9ULP0-5;H3BVF3	Protein NDRG4	NDRG4	31373000	36037000	45605000	0	0	0	47045000	37359000	49063000	0	0	0
H3BQM0;Q8NDF8;Q8NDF8-5;Q8NDF8-3;Q8NDF8-4;Q8NDF8-2	Non-canonical poly(A) RNA polymerase PAPD5	PAPD5	25917000	19527000	22536000	23661000	0	23908000	18529000	16625000	13665000	23823000	13222000	0
H3BQZ4;H3BSL4;H3BUJ7;Q66K89	Transcription factor E4F1	E4F1	13106000	6209000	9740800	7602200	6294700	5986200	5658300	14313000	8890400	14226000	6314500	13301000
H3BR23;O95273-2;O95273;H3BQA6	Cyclin-D1-binding protein 1	CCNDBP1	45426000	36454000	53177000	105750000	109040000	102850000	54664000	52540000	50068000	26744000	6061300	71483000
H3BRF9;Q96K21-2;Q96K21;Q96K21-4;Q96K21-3;H3BN64;H3BRM1;H3BUW6	Abscission/NoCut checkpoint regulator	ZFYVE19	430820000	419810000	405060000	421860000	393360000	441200000	329570000	341830000	360300000	329670000	336930000	305400000
O14562;H3BRL3;H3BUM8	Ubiquitin domain-containing protein UBFD1	UBFD1	975850000	1167700000	1150700000	848960000	823210000	910820000	1134700000	966620000	1104100000	951790000	913250000	1026300000
H3BRN4;P80404;H3BNQ7;H3BPW8;H3BMJ9;H3BRJ1;H3BRT1	4-aminobutyrate aminotransferase, mitochondrial	ABAT	1146100000	1187100000	1300200000	464200000	485960000	444110000	1224600000	1108400000	1241600000	321040000	213020000	215630000
K4DIB9;H3BRQ4;P50238	Cysteine-rich protein 1	CRIP1	0	0	0	19109000	25727000	20759000	0	0	0	0	0	0
H3BRU1;Q5XKK7;H3BNG0;H3BMU7;H3BPC2;H3BSK2;H3BM86;Q5XKK7-2;Q5XKK7-3	Protein FAM219B	FAM219B	11744000	8529700	9027300	18027000	18289000	18317000	5385100	6948900	4853800	4007200	0	0
H3BS42;Q9H5H4	Zinc finger protein 768	ZNF768	0	0	41722000	48006000	33690000	39288000	28028000	31516000	25168000	0	0	55855000
H3BTJ8;H3BS71;H3BTK5;Q96LD8	Sentrin-specific protease 8	SENP8	16462000	18810000	13464000	0	0	0	17499000	16411000	22081000	21539000	0	0
H3BSM7;Q96GQ5;H3BR29;I3L2V0;Q96GQ5-2;H3BTA0;H3BS97	RUS1 family protein C16orf58	C16orf58	24613000	0	44917000	37977000	44845000	43668000	0	35571000	15964000	47609000	40287000	37750000
H3BSW6;Q2VPK5-3;Q2VPK5-5;Q2VPK5	Cytoplasmic tRNA 2-thiolation protein 2	CTU2	65568000	75612000	66562000	32902000	37804000	40766000	74963000	70863000	86157000	59649000	66107000	66892000
Q9Y5N6;H3BT22;H3BTQ7	Origin recognition complex subunit 6	ORC6	24151000	18949000	23995000	25367000	25676000	27517000	24109000	24444000	25684000	23815000	17527000	23503000
H3BTA2;P60510;H3BV22;I3L4X0;H3BPN5;H3BVE3	Serine/threonine-protein phosphatase;Serine/threonine-protein phosphatase 4 catalytic subunit	PPP4C	914280000	996590000	854480000	770940000	808730000	866910000	1024200000	896500000	986530000	875780000	1169500000	904530000
H3BTB7;Q5JPH6;Q5JPH6-2	Probable glutamate--tRNA ligase, mitochondrial	EARS2	185960000	229510000	275060000	176260000	216360000	206170000	221790000	257120000	228840000	225560000	241660000	261110000
H3BTX7;Q96A37-2;Q96A37-3;Q96A37	RING finger protein 166	RNF166	0	0	0	14054000	13921000	9844500	0	0	0	14478000	0	0
H3BU23;Q01850;H3BN65;H3BTR1	Cerebellar degeneration-related protein 2	CDR2	19796000	23855000	0	42157000	0	0	36242000	29622000	45690000	0	36023000	51919000
H3BU53		MGA	20004000	15925000	21674000	0	0	0	0	18779000	0	14338000	0	0
Q96NX8;H3BU86;O14662-2;O14662-4;O14662-5;O14662;F8W9Z6;B7ZBM8;O14662-3;O14662-6;E9PND6;B7ZBM4;B7ZBM5;H0YEW0	Syntaxin-16	STX16;STX16-NPEPL1	83568000	128760000	64640000	52702000	51278000	41481000	76749000	93283000	91621000	92288000	126830000	86598000
H3BUF6;Q8WWM7-7;H3BSK9;H3BSQ5;H3BUE3	Ataxin-2-like protein	ATXN2L	0	0	17830000	25371000	0	22151000	0	0	0	0	0	0
O95166;H6UMI1;I3L3J4	Gamma-aminobutyric acid receptor-associated protein	GABARAP	33403000	34523000	36605000	26351000	40313000	26564000	34924000	33263000	34168000	34928000	0	21648000
H7BXD5;P28676;H7C2Z6;C9JIZ3;C9JWQ8;C9JV47	Grancalcin	GCA	723280000	651950000	733820000	918620000	1041600000	926890000	677180000	696730000	696320000	1274500000	1419700000	1187400000
H7BXF4;Q9NXE4-6;Q9NXE4-2;Q9NXE4;Q9NXE4-4;Q9NXE4-8;Q9NXE4-3;Q9NXE4-10;H7C1Q6;Q9NXE4-9;Q9NXE4-7;H7C0W5;Q9NXE4-5;H7C2J2;H7C2E2;H7C235;F2Z2I0;C9J647;F2Z2W5;F8WF03;F8WEQ5	Sphingomyelin phosphodiesterase 4	SMPD4	467420000	259590000	488840000	408840000	412900000	432950000	200100000	385840000	227950000	436150000	497960000	452810000
H7BXH2;Q5H9R7-5;Q5H9R7;Q5H9R7-2;Q5H9R7-6;E9PKF6;Q5H9R7-4;Q5H9R7-3;E9PQP7;H0YEN2;E9PNN8;E9PK08;H0YDW1;E9PKG4;E9PJD8;H0YEV0;H0YDK9	Serine/threonine-protein phosphatase 6 regulatory subunit 3	PPP6R3	1849900000	2159200000	1769600000	1869300000	1838100000	1928600000	1832900000	1583400000	1980400000	1606400000	1706000000	1592200000
H7BXH9;Q8WXB1;C9JSX1;C9JES0;Q8WXB1-2	Protein N-lysine methyltransferase METTL21A	METTL21A	67012000	65298000	0	44810000	50647000	33411000	43625000	0	45098000	57634000	52268000	67001000
H7BXP1;Q9NYR9-2;Q9NYR9;K7ERG2;Q9NYR9-3;A0A0A0MTA0;K7EKE9;K7ER26;K7ELL8;Q9NYR9-4	NF-kappa-B inhibitor-interacting Ras-like protein 2	NKIRAS2	123630000	134660000	119280000	207990000	185060000	169130000	122230000	142210000	132850000	165620000	122180000	125900000
H7BXY3;Q7L2E3-3;Q7L2E3;Q7L2E3-2	Putative ATP-dependent RNA helicase DHX30	DHX30	1224200000	912270000	1123200000	847590000	868910000	857420000	816840000	1043200000	860900000	889770000	824350000	999540000
H7BXZ5;O60229-5;O60229-6;O60229-4;O60229;Q86VW2-2;Q86VW2;Q86VW2-3	Kalirin	KALRN	55132000	61262000	34371000	13579000	0	40403000	77725000	53087000	63892000	20241000	29752000	17547000
H7BY36		EWSR1	21874000	0	21794000	28435000	32262000	33948000	12266000	0	0	45663000	0	47735000
H7BYF7;P33947-2;P33947	ER lumen protein-retaining receptor 2	KDELR2	236020000	131440000	0	0	0	146980000	0	343590000	208750000	0	97628000	0
H7BYJ1;Q969K3;Q969K3-2;G3V5F1;G3V504;A0A087WTM5	E3 ubiquitin-protein ligase RNF34	RNF34	0	0	21261000	0	0	0	16820000	0	0	21798000	0	30388000
H7BYT1;P48730-2;P48730;B0QY35;B0QY34;P49674;H0Y645;B0QY36;J3QQI9;H0Y2N6;B4DLF1	Casein kinase I isoform delta;Casein kinase I isoform epsilon	CSNK1D;CSNK1E	217570000	198240000	196270000	232800000	252960000	212520000	194860000	238410000	205930000	261100000	256260000	264330000
H7BZJ3		PDIA3	2048100000	2349800000	2385100000	2603700000	2777100000	2152500000	2297700000	2051700000	2067900000	2111300000	3879400000	2957600000
H7BZK6;P62068-4;P62068-3;P62068;P62068-2	Ubiquitin carboxyl-terminal hydrolase 46	USP46	0	0	0	0	0	0	0	0	0	28263000	0	0
H7BZW2;Q6P2H3-4;Q6P2H3-2;Q6P2H3;Q6P2H3-3	Centrosomal protein of 85 kDa	CEP85	21993000	25355000	24733000	21966000	17912000	19490000	31040000	29317000	25527000	17996000	0	15689000
H7C063		RGL4	92457000	117830000	79321000	94391000	74497000	0	75141000	62882000	113370000	102560000	82373000	77528000
H7C096;J3KN59;Q12982;Q12982-2;Q86WG3;Q86WG3-3	BCL2/adenovirus E1B 19 kDa protein-interacting protein 2;Caytaxin	BNIP2;ATCAY	32091000	37828000	26743000	34652000	31877000	34844000	36318000	29379000	30818000	34970000	0	0
H7C0J3;I3L229;H7C3H7		CHD3	26346000	26843000	20975000	36947000	28688000	35163000	27225000	29985000	34499000	0	13554000	14858000
H7C0N4		SF1	42023000	46759000	35061000	93102000	85118000	101670000	41410000	39627000	56001000	46522000	42572000	36975000
H7C0S8;O75575-2;O75575-3;O75575			0	1356900	0	0	0	0	1503900	1133400	1076100	0	0	0
H7C0W7;Q9BYI3-3;C9JTA1;Q9BYI3;Q8IXS8	Hyccin;Protein FAM126B	FAM126A;FAM126B	31840000	0	29656000	0	0	0	29343000	24651000	27114000	0	0	0
H7C144		ACTN4	14137000	15944000	13688000	0	16168000	0	13962000	12615000	14142000	15419000	30649000	0
H7C1M5;Q9H147;H7C1J2;F2Z2A4;H0Y501	Deoxynucleotidyltransferase terminal-interacting protein 1	DNTTIP1	23511000	0	19300000	42435000	36937000	45375000	25356000	30772000	0	39993000	66551000	34372000
H7C1N3;O15155;A0A3B3IU16;C9JTT8;Q68DU7;O15155-2	BET1 homolog	BET1;DKFZp781C0425	220740000	178200000	224840000	366970000	443930000	359260000	81477000	104530000	77979000	136890000	204700000	211790000
H7C1U8;Q9BUR5-2;Q9BUR5;A0A0J9YWW6;G3V1B6;A0A0J9YXS4	Apolipoprotein O	APOO	114460000	85891000	129840000	160910000	147730000	151710000	152650000	116870000	113350000	144080000	201010000	152100000
H7C1W4;Q93075	Putative deoxyribonuclease TATDN2	TATDN2	0	18394000	20285000	0	0	0	0	22168000	23114000	0	0	0
H7C268;Q9H0V1-2;Q9H0V1	Transmembrane protein 168	TMEM168	0	0	0	0	0	0	0	0	0	9230000	0	0
H7C2Q8;Q99848	Probable rRNA-processing protein EBP2	EBNA1BP2	1005400000	1036000000	1145900000	880200000	880970000	911280000	1006000000	1157700000	1031800000	1328700000	1236500000	1349900000
H7C2U6;F8WCR5		NIPSNAP1	90924000	111430000	56874000	0	0	0	123150000	137970000	139760000	0	0	0
H7C3K9		MLPH	0	0	0	0	0	0	0	0	0	0	0	0
H7C3T2;Q2TAZ0;Q2TAZ0-3	Autophagy-related protein 2 homolog A	ATG2A	34731000	31874000	26529000	27943000	31223000	48161000	30498000	28956000	40516000	38680000	26886000	0
H7C417;O76054-4;H7C4C6;H7C1K3;C9JZI9	SEC14-like protein 2	SEC14L2	0	0	0	0	0	0	0	0	0	0	0	0
Q9ULI3;H7C4M4;H7C4K2	Protein HEG homolog 1	HEG1	0	9611600	0	23756000	13491000	36380000	9856300	10442000	9390100	49457000	57216000	51102000
H7C560;P15056;A0A2U3TZI2;A0A2R8Y8E0;A0A2R8YDP5;A0A2R8Y492;H7C4S5;A0A2R8Y679;A0A2R8Y467;H7C5K3;A0A2R8YES9	Serine/threonine-protein kinase B-raf	BRAF	271380000	291610000	278340000	197390000	180370000	238770000	360140000	342920000	239350000	270820000	322230000	186240000
H7C561		SF1	0	11243000	7707800	0	0	0	7855800	0	10343000	0	0	0
H7C5G1;Q2TAA2;C9JE02;Q2TAA2-2	Isoamyl acetate-hydrolyzing esterase 1 homolog	IAH1	57273000	54668000	90921000	81617000	63704000	57496000	43602000	73953000	50609000	62283000	99080000	62900000
H9KV75;H7C5W8;G3V2W4;H0YJW3;H0YJ11;G3V2X9;G3V2E8;A0A494C031		ACTN1	0	0	0	0	0	0	0	0	0	0	31241000	0
Q9Y2R5;I3L0E3;E9PE17	28S ribosomal protein S17, mitochondrial	MRPS17;hCG_1984214	290860000	234330000	290450000	160500000	164700000	167540000	239430000	307390000	253760000	248360000	269580000	267560000
I3L0L6;Q9H6Y7	E3 ubiquitin-protein ligase RNF167	RNF167	18612000	18172000	15584000	24025000	20391000	15927000	24409000	21716000	20112000	17382000	15190000	17018000
I3L0N3;P46459;P46459-2;I3L2G1;I3L0L3;K7EQD6;I3L338;I3L4Q9	Vesicle-fusing ATPase	NSF	8862300000	8890000000	8835800000	9519400000	10503000000	9257600000	8226600000	7787800000	8333700000	7683100000	7646100000	7098300000
I3L0U5;Q6PK04	Coiled-coil domain-containing protein 137	CCDC137	53161000	43942000	54453000	81993000	91797000	88781000	43701000	66894000	56387000	86122000	74974000	89172000
I3L100;I3L2W2;Q96JN8-2;Q96JN8;I3L2Z9;K7EPS7;K7ESJ6;K7ESM1	Neuralized-like protein 4	NEURL4	0	18133000	0	43574000	18333000	34325000	0	0	21446000	0	0	19467000
I3L1Q2;Q8WUZ0;Q8WUZ0-2	B-cell CLL/lymphoma 7 protein family member C	BCL7C	107180000	101800000	143630000	87895000	210720000	251020000	97863000	119460000	91208000	87882000	76190000	140410000
I3L2A9;I3L2T0;I3L3N8;I3L437;I3L1Q3;Q8TE02-3;Q8TE02-2;Q8TE02;Q8TE02-4;I3L1A8;I3L200	Elongator complex protein 5	ELP5	37482000	62975000	40873000	40790000	35959000	36295000	35352000	38155000	54698000	52789000	63131000	38765000
I3L1T3;Q9GZP9	Derlin-2	DERL2	107740000	63323000	123790000	85906000	77759000	111140000	54419000	117720000	57591000	97481000	87056000	134460000
J3QS48;I3L295;J3KTK8;J3QQZ4;J3KT75;J3QW43;J3QRD5;O75352-2;O75352;J3KSI4;I3L405;I3L261;I3L1D2;I3L4E0	Mannose-P-dolichol utilization defect 1 protein	MPDU1	383850000	226970000	343580000	435350000	395270000	525990000	137910000	320200000	209770000	641740000	584360000	482670000
I3L2J0;A0A0A0MQR4;Q96RK0;I3L2I4;I3L373;I3L135;I3L1Q4		CIC	210960000	168870000	198960000	223180000	271340000	273050000	173170000	207150000	179080000	223650000	245140000	281990000
I3L2J8;Q9UPN4-3;Q9UPN4-2;Q9UPN4;I3L2X7;I3L316;I3L4M5	Centrosomal protein of 131 kDa	CEP131	52305000	38059000	38980000	0	0	0	0	43107000	40937000	0	0	0
I3NI53;I3L2W5;Q14894;I3L3J9;I3L325	Ketimine reductase mu-crystallin	CRYM	19254000	21233000	20885000	15320000	19213000	19660000	18129000	17630000	20102000	27858000	13994000	17054000
Q96FZ7;I3L4A1;I3L3E4	Charged multivesicular body protein 6	CHMP6	134140000	141570000	173590000	143240000	168180000	138700000	207420000	209140000	238780000	226060000	256550000	171790000
I3L4G0;J3KQU4;I3L4I4;O75674-2;O75674;I3L3T4;I3L367;I3NI44;O75674-3;I3L1Q1;I3L4N3;I3L1G1;I3L0N2;I3L3M3	TOM1-like protein 1	TOM1L1	100610000	159100000	110770000	192160000	242660000	148950000	157560000	133180000	152620000	107730000	88139000	93780000
I3L4X2;P33527-8;P33527-6;P33527-7;P33527-5;P33527-4;P33527-2;P33527-3;P33527;P33527-9;A0A0A0MS99	Multidrug resistance-associated protein 1	ABCC1	170770000	205390000	213710000	318570000	410220000	383730000	159290000	134920000	185830000	434150000	249870000	303060000
I3L4X6;Q86YT5-2;Q86YT5-4;Q86YT5-3;Q86YT5	Solute carrier family 13 member 5	SLC13A5	36392000	33028000	35677000	0	0	0	0	0	0	0	0	0
I3L4X7;Q13227-2;Q13227;I3L3Y9	G protein pathway suppressor 2	GPS2	33138000	30072000	24284000	0	17485000	0	28850000	29831000	34100000	30293000	0	23778000
J3KMZ0;O43248	Homeobox protein Hox-C11	HOXC11	0	0	0	7138400	5703500	4574500	0	0	0	11367000	8491300	11817000
J3KMZ7;Q9H0H0;A0A2R8Y4Z6;J3KRH0;A0A2R8Y7F8	Integrator complex subunit 2	INTS2	131020000	154930000	157580000	152170000	153330000	169000000	164910000	106830000	122920000	162870000	176990000	144490000
J3KMZ8;Q92785;Q92785-2;E9PN04	Zinc finger protein ubi-d4	DPF2	384070000	394310000	415700000	463590000	496260000	489120000	425070000	417680000	418330000	431490000	453580000	433860000
J3KMZ9;P01130-3;P01130-6;P01130-4;P01130;P01130-2;P01130-5;H0YMD1;H0YM92;H0YMQ3	Low-density lipoprotein receptor	LDLR	360330000	350280000	386610000	355240000	351180000	354600000	417670000	447250000	464270000	316610000	294580000	291210000
J3KN16;Q5VYK3;R4GMY1;R4GMY3;F6XAQ5	Proteasome-associated protein ECM29 homolog	KIAA0368;ECM29	4300700000	4260900000	4044100000	3833000000	3996100000	3799800000	4505800000	4454200000	4627300000	4862500000	4694500000	4874500000
J3KN36;Q5JPE7-2;P69849;Q5JPE7;Q5JPE7-3;A0A087WTD5	Nodal modulator 2;Nodal modulator 3	NOMO3;NOMO2	2469200000	2558300000	2714100000	3745300000	3780500000	4131300000	2900000000	2770600000	2559800000	3402500000	3824600000	3771500000
J3KN67		TPM3	0	0	52181000	0	0	0	0	0	0	0	802690000	0
J3KN75;Q0IIM8;Q0IIM8-2;Q0IIM8-3;D6RFZ2;H0Y552;D6RC82;J3KQ40;O95759	TBC1 domain family member 8B	TBC1D8B	381210000	398190000	354170000	200680000	212550000	253040000	432810000	381710000	412160000	283690000	277310000	271890000
J3KNC0;P52655	Transcription initiation factor IIA subunit 1;Transcription initiation factor IIA alpha chain;Transcription initiation factor IIA beta chain	GTF2A1	52548000	65665000	56803000	37511000	57870000	46207000	54004000	62559000	51276000	55496000	51442000	57411000
J3KNF4;O14618;E9PP76;E9PK03	Copper chaperone for superoxide dismutase;Superoxide dismutase [Cu-Zn]	CCS	1181500000	1183300000	1124700000	907290000	1011000000	973760000	777300000	742100000	880720000	622700000	949960000	725240000
J3KNN3;P15735-2;P15735;H3BP07;H3BTW6;H3BTI9;H3BN16	Phosphorylase b kinase gamma catalytic chain, liver/testis isoform	PHKG2	240370000	230710000	288790000	251780000	217500000	255490000	179430000	253560000	229460000	220350000	116710000	277160000
J3KNQ4;Q9NVD7;E9PS97;Q9NVD7-2	Alpha-parvin	PARVA	321840000	314670000	329170000	339900000	350260000	305390000	356160000	336460000	351590000	352270000	419970000	366700000
J3KNS1;Q9UPW5-2;Q9UPW5;Q9UPW5-3	Cytosolic carboxypeptidase 1	AGTPBP1	64629000	47553000	72208000	52858000	0	60662000	39094000	51682000	52447000	67605000	0	0
J3KNV1;O60281;O60281-2;E5RJG2;E5RFE6	Zinc finger protein 292	ZNF292	19976000	6165700	6081100	7318000	0	0	5602300	8915000	14742000	9511800	0	2730400
J3KNZ9;Q9HAH7;Q9HAH7-1	Probable fibrosin-1	FBRS	0	0	0	0	0	0	0	0	0	0	0	17835000
J3KP15;Q01130;J3QL05;Q01130-2	Serine/arginine-rich splicing factor 2	SRSF2	1926000000	2236100000	1712400000	1873100000	1750900000	1814900000	1865400000	2106300000	2076100000	1980900000	2453500000	2147600000
J3KP26;Q86W74-2;Q86W74;E5RHV2;E5RI20;E5RFM7;E5RI04	Ankyrin repeat domain-containing protein 46	ANKRD46	52341000	34486000	40423000	0	0	8553500	26944000	57072000	36252000	14604000	0	9900900
J3KPD3;F5GXV8;Q9Y580;I3L521;F5GY08;F5H606;G3V1T9;F5H674	RNA-binding protein 7	RBM7	41365000	65473000	49618000	58787000	72838000	59404000	50978000	42410000	27314000	46993000	59315000	37071000
J3KPF0;F8VWT9;Q9Y4D8-4;Q9Y4D8;Q9Y4D8-5;Q9Y4D8-2;A0A494C150;F8VU57;Q9Y4D8-3	Probable E3 ubiquitin-protein ligase HECTD4	HECTD4	186240000	173330000	181890000	126170000	105070000	64662000	140800000	195370000	182310000	123080000	99421000	133120000
S4R360;J3KPP0;S4R2Z7;Q9Y6G3	39S ribosomal protein L42, mitochondrial	MRPL42	97295000	89835000	75923000	36227000	448930000	80635000	84880000	123450000	73752000	96677000	62374000	190650000
J3KPP4;O95232;D6RDI2;D6RHH0;U3KQT3;C9JL41;H0YA81;O95232-2;H7C5U7;E7EN55;H0YBV7;H0YAR4	Luc7-like protein 3	LUC7L3	1133700000	1131400000	1088500000	859560000	926700000	1081300000	1306100000	1274700000	1269200000	1288400000	855240000	1253200000
P22455;P22455-3;J3KPQ0;P22455-2;H0Y9P2;H0YE20;P11362-4;P11362;P11362-7;P11362-2;P11362-20;E7EU09;A0A3B3ISD1;P11362-19;P11362-3;P11362-21;P11362-14;P11362-6;P11362-5;E7EVR7;P21802-8;P21802;P21802-6;P21802-12;P21802-17;P21802-18;P21802-9;P21802-10;P21802-5;D2CGD1;A0A0A0MR25;P21802-23;P21802-22;H7BXU9;P21802-4;P21802-20;S4R381;P21802-15;H7C265;P21802-3;P21802-11;P21802-13;P21802-2;P21802-21;P21802-16	Fibroblast growth factor receptor 4;Receptor protein-tyrosine kinase	FGFR4	109360000	145890000	88269000	32666000	0	0	180750000	171040000	222820000	12297000	0	26103000
J3KPS0;Q9NXW2;Q9NXW2-2;V9GYN7;V9GY70	DnaJ homolog subfamily B member 12	DNAJB12	72168000	59932000	83329000	102390000	126490000	121400000	48819000	43506000	59629000	63478000	95576000	92609000
J3KPT4;Q9H4I3;Q9H4I3-2	TraB domain-containing protein	TRABD	188780000	219750000	296820000	351870000	380280000	368300000	211060000	176300000	255860000	340510000	282960000	287190000
J3KPV1;Q9BUK0;Q9BUK0-2;Q9BUK0-4	Coiled-coil-helix-coiled-coil-helix domain-containing protein 7	CHCHD7	32304000	22627000	42107000	0	0	0	0	30223000	24956000	24014000	0	0
J3KPX7;Q99623;F5GY37;Q99623-2;F5GWA7;F5H3X6;F5H0C5;F5H2D2;U3KPZ5	Prohibitin-2	PHB2	12016000000	9829200000	12641000000	12216000000	11786000000	10899000000	10810000000	12918000000	11488000000	14720000000	13521000000	13940000000
J3KQ09;X6R2I3;Q9UNA4;J3KSW2;J3KRS8;J3KTM8;J3QR36;J3KTN3	DNA polymerase iota	POLI	13447000	22125000	0	0	0	0	0	0	0	0	0	0
J3KQ32;Q9NTK5;Q9NTK5-3;Q9NTK5-2;C9JTK6;C9JCJ9	Obg-like ATPase 1	OLA1	8509100000	8509200000	8362800000	8000700000	8465200000	8182800000	8080200000	7979600000	7986500000	8892500000	8595500000	8496600000
J3KQ48;Q9Y3E5	Peptidyl-tRNA hydrolase 2, mitochondrial	PTRH2	688120000	478300000	682080000	861500000	823430000	756360000	524090000	959520000	700500000	1159100000	1164100000	917220000
J3KQ52;P10144;Q6XGZ2;J3KPK2	Granzyme B	GZMB	0	0	0	73919000	82795000	68689000	0	0	19706000	70241000	68369000	26609000
J3KQA0;P21579;Q8N9I0	Synaptotagmin-1	SYT1	39940000	91482000	54907000	55502000	97297000	64139000	45448000	34674000	42456000	0	0	0
J3KQJ1;Q8NBJ7;A0A494C1B1;A8MXB9;C9J660;Q8NBJ7-3;C9JL30;H7C3B2;E9PBT8;F8WA42;Q8NBJ7-2;J3QT17;Q8NBJ7-5;E9PG02;F8WEX5;F8WES7;Q8NBJ7-4;F8WEV7	Sulfatase-modifying factor 2	SUMF2	533890000	483900000	579200000	1446200000	1657100000	1466900000	570240000	633030000	596570000	1102600000	1075800000	1032200000
J3KQJ9;Q8N2E2	von Willebrand factor D and EGF domain-containing protein	VWDE	0	0	0	120010000	0	0	0	0	0	0	0	70987000
J3KQL8;Q9BQE5;E9PM95;B0QYK8	Apolipoprotein L2	APOL2	1259700000	1231600000	1103200000	7245200000	6538000000	6302500000	963040000	1134800000	1074400000	6935500000	5589200000	5784300000
J3KQN4;H0Y5B4;H7BZ11;P83881;R4GN19;H7BY91;H0Y3V9	60S ribosomal protein L36a	RPL36A;RPL36A-HNRNPH2	871770000	815040000	880600000	735770000	653820000	495030000	683180000	761830000	708390000	641950000	486260000	597500000
J3KQS5		PLEKHA8	0	0	0	13545000	9292200	11065000	9046000	10564000	13603000	0	0	9253500
J3KR25;Q96RU7;A0A087WTX3;B0QYQ2	Tribbles homolog 3	TRIB3	0	0	0	20671000	36064000	33158000	22019000	21137000	0	32350000	27937000	0
J3KR35;Q8WUD4;S4R331;C9JUN5	Coiled-coil domain-containing protein 12	CCDC12	217220000	228040000	194290000	168510000	190120000	176290000	202990000	196410000	230770000	172820000	171710000	170210000
J3KR44;Q96FW1;F5H6Q1;F5GYN4;F5GYJ8;F5H3F0;Q96FW1-2	Ubiquitin thioesterase OTUB1	OTUB1	3560200000	3681000000	3416400000	3706200000	3961200000	3557000000	2862100000	2838600000	3002000000	3360000000	3731000000	3130100000
J3KR72;P49848-4;P49848;P49848-3;P49848-2;C9JTY6;C9JFL8;E5RKA5;F8WEJ7;C9J7C4;C9JIS2;E5RHA1;C9J088;C9JHQ8	Transcription initiation factor TFIID subunit 6	TAF6	333390000	306770000	310720000	322970000	345570000	352520000	343340000	333180000	303360000	429620000	320270000	395090000
Q9BTW9;J3KR97;Q9BTW9-4;Q9BTW9-5;A0A0J9YVR1;A0A0J9YWI5;I3L439;I3L163;I3L143;I3L0V3;I3L131;I3L3H4;I3L500;I3L4D2;Q9BTW9-3;A0A0J9YVU1;I3L120;A0A0J9YXU4;I3L1S3;Q9BTW9-2;A0A0J9YYG2	Tubulin-specific chaperone D	TBCD	472580000	494740000	480750000	452230000	465280000	413590000	476760000	499100000	538850000	350880000	419150000	366330000
J3KRC5;Q7Z6J9-2;Q7Z6J9;J3QLM6	tRNA-splicing endonuclease subunit Sen54	TSEN54	40860000	0	0	0	0	32203000	54714000	41683000	45619000	0	43382000	0
J3KRP6;J3QS72;X6R3J2;J3QQM2;J3KT74;J3QQW2;Q15532-2;Q15532;F5GWN1;J3QSB3;J3QSG1;J3QQW6;J3QLJ7;J3QQX5;J3KT22;B4DLD3	Protein SSXT	SS18	37279000	64819000	35633000	64336000	61689000	73073000	64942000	57598000	56646000	48476000	62409000	69625000
J3KRR0;J3QQM5;Q9BT23;J3QL69	LIM domain-containing protein 2	LIMD2	0	10351000	0	0	0	0	0	8359200	11283000	17850000	0	0
Q14197;J3KS15;J3QRF8	Peptidyl-tRNA hydrolase ICT1, mitochondrial	ICT1	227760000	215980000	256900000	229600000	161380000	174400000	236330000	292440000	273020000	214540000	154450000	176580000
J3KS23		CBFB	82111000	91159000	98794000	116300000	111080000	142290000	94238000	113380000	109300000	84784000	137370000	116640000
J3QRG5;J3KSJ5;Q9BQA9-2;Q9BQA9;J3KTF4;J3QKS6;J3QQQ4;J3QRZ2;J3QLB7;J3QKZ6;H0Y2X1;J3KTI1;J3KSB6;J3KS78;J3QS53	Uncharacterized protein C17orf62	C17orf62	126890000	65184000	115630000	404600000	536300000	347690000	46898000	70550000	61021000	240760000	371050000	149980000
J3KSJ7;P0CG13	Chromosome transmission fidelity protein 8 homolog	CHTF8	0	14306000	0	0	0	0	10383000	6987900	8585300	0	0	0
J3QQY0;J3KSZ8;Q68DK7;Q68DK7-2;J3KRQ4;Q68DK7-3	Male-specific lethal 1 homolog	MSL1	0	0	0	12618000	9986800	11212000	3652600	8425600	10510000	7994200	17526000	6738300
J3KT86;Q96GD4-4;Q96GD4;Q96GD4-5;J3QLN8;Q96GD4-2;J3QR41;J3KTD6;J3KRJ2;Q96GD4-3;J3KRF8	Aurora kinase B	AURKB	218520000	199680000	202240000	48164000	64099000	39896000	142640000	375080000	203760000	102400000	80893000	20193000
J3KTA1;Q96IG2-2;Q96IG2;J3QKL3	F-box/LRR-repeat protein 20	FBXL20	21644000	20483000	35358000	74854000	53889000	83499000	34830000	18452000	0	33082000	62204000	51545000
J3KTA4;P17844;P17844-2;J3QRQ7;J3KRZ1;J3QSF1;J3KRX8;J3KTQ4;J3QR02;X6RLV5;J3QRN5	Probable ATP-dependent RNA helicase DDX5	DDX5	7284300000	6725700000	7508100000	6768000000	6562500000	6940800000	7601600000	7948200000	8058000000	8353400000	7720600000	7612400000
J3QR09;J3KTE4;P84098	Ribosomal protein L19;60S ribosomal protein L19	RPL19	6033700000	5618700000	5211200000	3747800000	2472400000	2290100000	4364100000	5185100000	6219700000	4761000000	2754800000	3552900000
J3KTL2;Q07955;Q07955-3;Q07955-2;J3KSR8;J3QQV5;J3KSW7	Serine/arginine-rich splicing factor 1	SRSF1	7852600000	7964300000	7899000000	9398200000	9085700000	9066500000	7686600000	8012200000	8233800000	9208900000	9868500000	8500000000
J3QKK3;O43502;H7C1R0;J3QLB5;E9PI66;J3QLQ2;A0A087WZ35;Q7KZJ0;J3QR58;H7C2Q5;O43502-2	DNA repair protein RAD51 homolog 3	RAD51C	68945000	79565000	46127000	86009000	86338000	83458000	0	0	0	13897000	79947000	0
J3QL56;O75880	Protein SCO1 homolog, mitochondrial	SCO1	988150000	735230000	1017800000	1175300000	1068700000	1008200000	775250000	1049200000	964040000	1018000000	1336500000	890380000
J3QL71;Q96FV2-2;Q96FV2;J3QRJ1;J3QR84;J3KT79;J3QQM9;J3KS57	Secernin-2	SCRN2	276520000	324040000	332650000	308730000	265120000	331750000	316800000	296910000	272030000	352910000	371750000	457880000
J3QL81;Q7L5Y1;A0A3F2YNX7;Q7L5Y1-6;Q7L5Y1-2;Q7L5Y1-4;Q7L5Y1-5;Q7L5Y1-7;X6RM24;J3QL99;J3QSB6;Q7L5Y1-3	Mitochondrial enolase superfamily member 1	ENOSF1	80500000	70281000	76298000	0	91111000	0	77555000	86955000	88624000	63400000	0	75816000
J3QLK2;J3QS31;J3QS07;J3QL97;Q19AV6	Zinc finger SWIM domain-containing protein 7	ZSWIM7	3746900	4360800	2056700	0	0	0	4815700	5537500	6200800	0	0	6126700
J3QLE5;P14678-2;P63162;P14678;P63162-2;P14678-3;J3KRY3;S4R3P3	Small nuclear ribonucleoprotein-associated proteins B and B;Small nuclear ribonucleoprotein-associated protein N	SNRPN;SNRPB	6827100000	7000500000	7932400000	7900200000	7655000000	7337200000	6160100000	7610000000	6996700000	7569600000	10379000000	7735700000
J3QLG1;J3QRY2;J3QQM4;Q9HAU4	E3 ubiquitin-protein ligase SMURF2	SMURF2	0	0	3125600	0	0	0	2221200	3915200	2638700	0	0	0
J3QLS3;Q9Y2R9;J3QQS1;J3KSI8;J3QKW2	28S ribosomal protein S7, mitochondrial	MRPS7	499450000	484160000	469140000	309640000	287760000	342820000	421230000	454040000	475100000	410310000	399260000	389230000
J3QQ67;Q07020;G3V203;H0YHA7;Q07020-2;F8VYV2;F8VUA6;A0A075B7A0;F8VXR6	60S ribosomal protein L18	RPL18	9140700000	8164400000	9784200000	7701400000	7081400000	7870300000	9936500000	10741000000	11070000000	11172000000	8325600000	8071400000
J3QQJ0;Q9UHR5-2;Q9UHR5;X6R3T8;J3QLH3;J3QLM2;J3KRR6;F5H478;J3KRU5;J3KS14	SAP30-binding protein	SAP30BP	333040000	358440000	315210000	325550000	347090000	338510000	382540000	376420000	361760000	409890000	465040000	410600000
J3QQW9;Q15022	Polycomb protein SUZ12	SUZ12	546600000	505350000	638330000	477860000	510250000	543990000	461010000	560990000	490890000	534360000	401100000	513270000
J3QR07;Q96MU7-2;Q96MU7;J3KRG5	YTH domain-containing protein 1	YTHDC1	520020000	607360000	559930000	691900000	641390000	508530000	645230000	569130000	687490000	741430000	613670000	658670000
J3QR65;Q9NYA4	Myotubularin-related protein 4	MTMR4	15445000	13590000	14974000	0	0	0	16410000	12684000	16231000	0	0	0
K7ES20;K7ENC6;J3QRG6;P42771-2;P42772;P42771;P42771-4	Cyclin-dependent kinase inhibitor 2A;Cyclin-dependent kinase 4 inhibitor B	CDKN2A;CDKN2B	0	5113400	0	8006300	0	0	0	0	0	19833000	11035000	20389000
J3QRS3;P19105;J3KTJ1;P24844-2	Myosin regulatory light chain 12A	MYL12A	0	147560000	52888000	0	0	0	127960000	86887000	95439000	0	66991000	0
J3QRS9;O43670;O43670-4;X6R4W8;O43670-3;J3KS31;J3QS27;J3KTL1;J3KRB6;J3KRW6;H0Y3M2	BUB3-interacting and GLEBS motif-containing protein ZNF207	ZNF207	0	14035000	0	0	0	18612000	0	15630000	0	30457000	23177000	19643000
J3QRU1;P07947;P06241-3;P06241-2;E5RFS5;Q573B4;P06239;P06239-3	Non-specific protein-tyrosine kinase;Tyrosine-protein kinase Yes	YES1	1629700000	1525100000	1464200000	2303900000	2296200000	2351500000	1608000000	1645400000	1624200000	2104800000	2291300000	2197600000
J3QRU8;Q9Y2X7;A0A0C4DGN6;Q9Y2X7-3;J3QLH1;Q9Y2X7-2;J3QQI0;K7EN79;J3QL89	ARF GTPase-activating protein GIT1	GIT1	100800000	102430000	115570000	146700000	126100000	157280000	94605000	104910000	83651000	111590000	137050000	185380000
J3QRV5;Q6P1M3-2;Q6P1M3;Q6P1M3-3;J3QL58;J3QSA6;J3QLD8;J3QLV4;J3QRZ8;J3KRE1;J3QS20	Lethal(2) giant larvae protein homolog 2	LLGL2	272480000	312430000	298560000	451940000	490770000	487220000	311780000	274700000	308170000	450800000	553810000	463540000
Q14119;J3QSH4;J9JIC7	Vascular endothelial zinc finger 1	VEZF1	83008000	43447000	67754000	74028000	61628000	80509000	32534000	64853000	52639000	117640000	68314000	75191000
J3QT28;O43684-2;O43684;J3QSX4	Mitotic checkpoint protein BUB3	BUB3	2248500000	2421400000	2387300000	3333100000	3396600000	3405600000	2224100000	2172000000	2384600000	2377100000	3107500000	2727400000
J3QTA2;Q99933-4;Q99933-3;Q99933-2;Q99933	BAG family molecular chaperone regulator 1	BAG1	0	29619000	0	0	0	0	0	0	0	0	0	0
J3QTA6;Q9BRQ6;J3QTB2;H0Y922	MICOS complex subunit MIC25	CHCHD6	225150000	209790000	174350000	256670000	185510000	240940000	186290000	157210000	175620000	230910000	160020000	211140000
J9JIC5;Q9HAS0;J3KRR1;K7EII1;K7EIQ2;K7ERX0;J3QKQ1;J3KT97	Protein Njmu-R1	C17orf75	199220000	252370000	221630000	246940000	273710000	298500000	219850000	185880000	225860000	245000000	279420000	222070000
K4DI83;Q9HCN3	Transmembrane protein 8A	TMEM8A	0	0	0	0	0	0	0	0	0	0	0	12397000
K4DI93;Q13620-1;Q13620;Q13620-3;A6NE76	Cullin-4B	CUL4B	4380800000	4425400000	4205700000	3037900000	3046900000	3029900000	4444100000	4293700000	4642200000	3072100000	3241800000	2908700000
K7EID0;Q9UH92-2;Q9UH92-3;Q9UH92	Max-like protein X	MLX	8758200	11816000	9624900	16582000	11869000	10347000	10969000	0	0	0	0	6425000
K7EM02;K7EIJ8;Q8IYT4-2;Q8IYT4	Katanin p60 ATPase-containing subunit A-like 2	KATNAL2	2434700000	2325800000	2576000000	2385200000	2792900000	2711000000	2389000000	2286400000	2631700000	2765700000	0	2035500000
K7EIN2;Q9BRJ7;K7ENA3;W4VSQ8;Q9BRJ7-2	Protein syndesmos	NUDT16L1	92422000	74727000	74299000	15271000	10304000	9378000	83834000	82199000	99590000	48088000	0	31765000
K7EIP7;K7ERW0;K7ENM8;Q9BWQ6	Protein YIPF;Protein YIPF2	YIPF2	63060000	67888000	70661000	41240000	71708000	54354000	63858000	69130000	58285000	69798000	85034000	75089000
K7EIU8;Q13485;K7ES96;K7EIJ2;K7ENG8;K7EL15;K7EL18;K7ENG1;A0A087WUF3	Mothers against decapentaplegic homolog;Mothers against decapentaplegic homolog 4	SMAD4	131710000	137170000	160360000	115320000	157240000	136240000	162520000	141790000	170020000	106890000	255130000	103300000
K7EIX2;Q6AI08;A0A087WXZ7;K7ELR8;K7EKW7;K7ESP5	HEAT repeat-containing protein 6	HEATR6	72307000	72577000	58952000	112370000	112210000	133080000	56568000	63181000	67735000	72606000	47207000	50900000
K7EIY1;Q9Y421;K7ENN5;Q9Y421-3;Q9Y421-2;K7ELZ8	Protein FAM32A	FAM32A	43548000	56488000	63847000	90523000	86593000	114820000	82406000	101810000	91792000	109600000	134260000	132890000
Q9BV68;K7EIY6;U3KQF4	E3 ubiquitin-protein ligase RNF126	RNF126	259920000	295180000	276320000	167570000	171080000	156330000	303910000	259140000	263340000	205950000	174730000	220270000
K7EQ79;K7EIY8;Q6PI98;Q6PI98-4	INO80 complex subunit C	INO80C	0	0	0	0	0	24544000	0	0	0	17263000	20830000	0
Q96SL8;K7EJE2;K7ERP0	Flt3-interacting zinc finger protein 1	FIZ1	0	0	0	0	0	0	17990000	24464000	0	20084000	0	0
K7EJH8		ACTN4	21599000	43616000	30659000	32245000	47710000	47084000	45466000	53280000	57874000	67289000	91800000	80508000
K7EK00;Q96ND0;K7EPG9;K7ERQ2	Protein FAM210A	FAM210A	257050000	184720000	258960000	98241000	80101000	93485000	172760000	197260000	136960000	79759000	111850000	109750000
K7EK07;P84243;Q6NXT2;K7EMV3;B4DEB1;K7ES00;K7EP01;P0DPK2;A0A2R8Y7G9;P0DPK5	Histone H3;Histone H3.3;Histone H3.3C	H3F3B;H3F3A;H3F3C	5726400000	2737200000	5484900000	6617100000	7592400000	8935700000	1878400000	4819800000	2111400000	8332000000	8645600000	8250300000
K7EK11;Q8N159	N-acetylglutamate synthase, mitochondrial;N-acetylglutamate synthase long form;N-acetylglutamate synthase short form;N-acetylglutamate synthase conserved domain form	NAGS	17851000	66866000	14545000	0	0	0	0	0	0	0	0	0
K7ELD8;K7EK12;K7EQS1;Q9P2W1-2;Q9P2W1	Homologous-pairing protein 2 homolog	PSMC3IP	27541000	22081000	21742000	0	0	0	28953000	26880000	20392000	23546000	31370000	0
K7EQ55;K7EK33;Q96EP5;Q96EP5-2;K7EQ02	DAZ-associated protein 1	DAZAP1	2696100000	2901300000	2905300000	3802900000	3634900000	3941400000	3256300000	3219900000	3392100000	3879000000	4098100000	3410400000
K7EKE6;K7EJE8;P36776-3;K7ER27;K7ERR6;K7EQF8	Lon protease homolog, mitochondrial	LONP1	12919000000	13013000000	13407000000	15534000000	16517000000	16583000000	14270000000	13967000000	13860000000	16188000000	16383000000	15550000000
O60437;K7EKI8;K7EQ71	Periplakin	PPL	19897000	20582000	14187000	464230000	465010000	532230000	31893000	28182000	42748000	642680000	448960000	380100000
K7EKW4;Q96AB3;K7ENV7;Q96AB3-2;Q96AB3-3	Isochorismatase domain-containing protein 2, mitochondrial	ISOC2	636390000	771650000	655180000	1248100000	1373600000	1379900000	1034600000	919730000	947890000	2575800000	3275700000	2174300000
K7EL81;Q9BZL4-5;Q9BZL4-3;Q9BZL4-4;Q9BZL4;Q9BZL4-2;K7ER83	Protein phosphatase 1 regulatory subunit 12C	PPP1R12C	29861000	24860000	26323000	39586000	44100000	58279000	32157000	0	25278000	32674000	39389000	24416000
K7ELC2;P62841;K7EM56;A0A0B4J2B4;S4R417;K7EQJ5;K7EJ78;S4R456	40S ribosomal protein S15	RPS15	7008500000	8590300000	7162200000	7226900000	7498800000	8047100000	7896000000	9036400000	9166300000	6523200000	5513500000	6383400000
K7ELE3;Q08117;Q08117-2	Amino-terminal enhancer of split	AES	13734000	18945000	22189000	19618000	28799000	22961000	28169000	25040000	29411000	0	0	0
K7ELH7;K7ENE2;Q8IVV7	Glucose-induced degradation protein 4 homolog	GID4	0	0	0	0	0	0	23787000	23434000	17059000	0	0	25674000
K7ELH8;Q6ZPD9;Q8N6Q4;K7ELG1;Q6ZPD9-2	Probable C-mannosyltransferase DPY19L3	DPY19L3	23802000	18820000	28177000	22215000	23237000	35176000	12386000	17341000	17864000	21296000	20617000	17150000
K7ES43;K7ELI4;P13994	Coiled-coil domain-containing protein 130	CCDC130	17048000	14648000	11567000	17200000	18030000	15823000	10018000	11693000	13312000	17904000	0	13993000
K7ELL7;P14314;K7EPW7;K7EKX1;K7EJ70;K7EIP3;K7EL27	Glucosidase 2 subunit beta	PRKCSH	22233000000	21902000000	20656000000	18956000000	17636000000	17162000000	22168000000	22533000000	23886000000	18327000000	16606000000	15698000000
K7EM09;K7EPR0;K7ELQ9;Q6UW68	Transmembrane protein 205	TMEM205	1800300000	704620000	1917700000	2086600000	1853000000	1914600000	720680000	1520900000	963540000	1707200000	1569900000	1605600000
P41567;K7EM18;K7EQP2	Eukaryotic translation initiation factor 1	EIF1	3796200000	3689100000	4013300000	3429500000	3686800000	3734400000	4086000000	4052600000	4245900000	4393000000	4592500000	4584500000
K7ENF0		NARS	90991000	120420000	123060000	91024000	94764000	71565000	132610000	122900000	156730000	107080000	146470000	86063000
K7ENL9;Q96DM3;A0A087WZD4;K7EIS6;K7EL80;K7EQJ3;K7EQ65	Uncharacterized protein C18orf8	C18orf8	382630000	354690000	406250000	702690000	642240000	732460000	327520000	384280000	357720000	743040000	545600000	629480000
K7EP90;Q9BTD8-4;Q9BTD8-2;Q9BTD8-3;Q9BTD8;K7EQ03;K7ER08;K7EML2	RNA-binding protein 42	RBM42	397300000	335420000	357400000	240200000	274210000	290900000	333060000	345780000	307240000	298400000	375560000	478100000
K7EQ34;U3KQT6;K7EPA3;Q9NX61-2;Q9NX61;K7EQE7	Transmembrane protein 161A	TMEM161A	43320000	41118000	35581000	30665000	21999000	17945000	27988000	43822000	30385000	31494000	22121000	33999000
K7EPI4		GFAP	45768000	89015000	53600000	107000000	126630000	53150000	48491000	50117000	41626000	73097000	14600000	137340000
K7EPL5;Q9BQ95-4;Q9BQ95-2;Q9BQ95;K7EJI1;J3KTF5;K7EN32	Evolutionarily conserved signaling intermediate in Toll pathway, mitochondrial	ECSIT	64500000	110710000	67067000	15998000	53240000	55623000	100610000	140150000	122340000	84449000	25303000	120580000
K7EPS8;Q9NSK7-3;Q9NSK7-4;F8W6J3;Q9NSK7-2;Q9NSK7	Protein C19orf12	C19orf12	0	30567000	39177000	34105000	45851000	29549000	40491000	35179000	38505000	37577000	110100000	0
K7EQR1;Q9NPG3-2;Q9NPG3	Ubinuclein-1	UBN1	13463000	10728000	16639000	21691000	15880000	19213000	7341500	12638000	8669000	7061200	6130300	4521900
K7ER15;Q9H0R4;K7EMY7;Q9H0R4-2;K7EQD2;K7EJQ8;A0A1B0GXB1	Haloacid dehalogenase-like hydrolase domain-containing protein 2	HDHD2	372680000	386940000	412220000	333250000	373110000	345730000	342540000	317550000	345940000	320190000	401070000	297260000
K7ER53;O95644-8;O95644-11;O95644-3;O95644-10;O95644-2;O95644-5;O95644-4;O95644-6;O95644;F5H4S8;O95644-17	Nuclear factor of activated T-cells, cytoplasmic 1	NFATC1	0	0	0	21483000	21594000	30216000	0	0	0	0	0	0
Q06136;K7ERC8;K7EQS7	3-ketodihydrosphingosine reductase	KDSR	179910000	0	256830000	769430000	605430000	801840000	72632000	194640000	64720000	648460000	757820000	401920000
K7ERD7;O95707;K7ESH8;K7EK50;A0A0A0MQS4;K7EQV2	Ribonuclease P protein subunit p29	POP4	84346000	61352000	105670000	62741000	64709000	60802000	95913000	92160000	103060000	85905000	54266000	66441000
K7ERE1;Q8N2U0;K7ESI7;K7ENI6	Transmembrane protein 256	TMEM256	231200000	65770000	209750000	264470000	171560000	202520000	128570000	173680000	63472000	157510000	369100000	90608000
K7ERI9;P02654;K7EKP1;K7EJI9;K7ELM9;K7EPF9	Apolipoprotein C-I;Truncated apolipoprotein C-I	APOC1	85029000	162950000	103260000	141630000	75308000	80094000	232830000	153360000	171760000	50870000	62628000	63551000
K7ES11		UBE2O	10407000	11278000	8366900	0	0	0	0	9477700	0	0	0	0
K7ESE6;Q9BUM1	Glucose-6-phosphatase 3	G6PC3	56184000	37891000	69725000	61746000	65576000	71263000	23515000	53040000	26067000	54884000	48790000	79898000
K7ESF4;U3KQA4			36320000	46513000	53275000	0	0	0	49417000	66696000	59220000	58296000	50317000	0
K7ESP4;Q8WVC6;Q8WVC6-2	Dephospho-CoA kinase domain-containing protein	DCAKD	64837000	44976000	83617000	85927000	65327000	80136000	36525000	32581000	35294000	43058000	40125000	48699000
L0R6Q1		SLC35A4	34302000	16604000	45501000	38584000	53564000	33597000	36783000	48328000	34029000	35400000	49843000	34962000
L0R819;U3KQP6;U3KQ49;U3KQP1		ASNSD1	121830000	109690000	153270000	94943000	162740000	113080000	147950000	179490000	149640000	124970000	79298000	100280000
M0QWZ7;Q9NP81;M0R2C6;Q9NP81-2;M0R259;M0QX29;B4DJM9;M0R2H5;M0R1C0	Serine--tRNA ligase, mitochondrial	SARS2	1458400000	1562900000	1531700000	967010000	1007300000	918900000	1671600000	1720000000	1604500000	942700000	1103800000	997300000
M0QX69		UBE2M	9755900	0	0	14860000	0	12147000	12333000	12424000	12924000	0	14414000	17876000
M0QXN9;M0R0B4;M0R2G3;M0R228;M0QX74;M0QXP3;M0QY77;Q9BQD3	KxDL motif-containing protein 1	KXD1	38315000	40567000	38834000	42942000	37403000	40599000	37742000	29266000	41061000	43433000	45450000	43966000
M0QXA7;O95785-3;B9EGQ5;O95785-4	Protein Wiz	WIZ	178350000	136950000	196500000	229890000	243150000	202010000	134020000	188950000	139900000	138390000	86807000	128910000
M0QXF9;O15382;B3KSI3;M0QZ10;O15382-2;M0QZP4;M0R2K7	Branched-chain-amino-acid aminotransferase;Branched-chain-amino-acid aminotransferase, mitochondrial	BCAT2	868810000	925770000	994690000	1139500000	1502800000	1522200000	1260300000	1284700000	1008700000	826390000	1311100000	929930000
M0QXT0;Q15853-4;Q15853-3;Q15853-2;Q15853	Upstream stimulatory factor 2	USF2	0	0	0	0	0	0	0	0	0	0	33869000	0
M0QXZ5;Q96B54	Zinc finger protein 428	ZNF428	185620000	147370000	186460000	67021000	96883000	97899000	106500000	136090000	123960000	62729000	67118000	60486000
M0QY01		EPS15L1	46221000	54312000	44804000	0	0	0	0	0	0	0	0	0
M0QY35;Q9BPX1;M0R147;M0R2R3	17-beta-hydroxysteroid dehydrogenase 14	HSD17B14	0	0	15990000	17789000	0	0	31341000	26643000	28006000	15666000	0	11819000
M0R073;M0QYA8;Q8IV63-2;Q8IV63-3;Q8IV63;M0QXV1;M0QXD7;M0QX88;M0R025;M0R200;M0QYG0	Inactive serine/threonine-protein kinase VRK3	VRK3	31663000	25992000	32539000	8255700	8227000	8935000	31354000	27576000	27218000	13867000	13438000	21785000
M0QYF9;Q9NSC5-5;Q9NSC5-2;Q9NSC5	Homer protein homolog 3	HOMER3	0	0	0	0	0	3051100	0	0	0	0	0	0
M0QYH2;Q96T60;Q96T60-2;M0R3C8;A0A0D9SFL2;M0QYI1;A0A0D9SFD6;M0R097;A0A0D9SEV0;M0R000;A0A1B0GW17;A0A1B0GU66	Bifunctional polynucleotide phosphatase/kinase;Polynucleotide 3-phosphatase;Polynucleotide 5-hydroxyl-kinase	PNKP	705070000	665030000	589680000	446840000	399910000	462880000	569670000	549000000	614710000	563570000	382220000	459720000
M0QYM7;M0R042		TUBB4A	31912000	27454000	32137000	18520000	21605000	17547000	38695000	30247000	35558000	34315000	39477000	27977000
M0R0H0;M0R220;M0QYN1;M0QYN9;P55899;M0R266;M0QYM4;M0R0A9	IgG receptor FcRn large subunit p51	FCGRT	47631000	33036000	60957000	37822000	50285000	41192000	54696000	53842000	54897000	43071000	30335000	32320000
M0R0N4;X6R390;M0QYZ2;P53680-2;P53680;M0QZ21;M0R1S0	AP-2 complex subunit sigma	AP2S1	478530000	459210000	374580000	651850000	769350000	491630000	287700000	298680000	367710000	432110000	390120000	531850000
M0QZ22;Q5PRF9;A0A087WZT0;M0QY61;M0R0X3;M0QX45	Protein Smaug homolog 2	SAMD4B	156160000	372030000	448030000	440900000	34556000	228560000	33782000	97807000	118620000	266420000	16708000	475730000
M0QZ28;Q9Y4J8-13;Q9Y4J8-2;Q9Y4J8-14;Q9Y4J8-15;M0R021;Q9Y4J8-8;Q9Y4J8-6;Q9Y4J8-10;Q9Y4J8-11;Q9Y4J8-16;Q9Y4J8-5;Q9Y4J8;K7ERH7;M0R0C4	Dystrobrevin alpha	DTNA	57455000	41337000	43250000	152580000	125890000	123120000	28866000	42084000	55596000	70241000	44502000	50053000
M0QZH0;Q96D15	Reticulocalbin-3	RCN3	0	0	0	13801000	23314000	15679000	0	0	0	0	0	0
M0QZM1		HNRNPM	127940000	112780000	120190000	114730000	132510000	123600000	80491000	77500000	104930000	61304000	59640000	67240000
M0QZQ2;Q71SY5-5;Q71SY5;Q71SY5-2;Q71SY5-4;Q71SY5-3;B9TX33;B9TX31;Q71SY5-6;M0QYR4;A0A087WW16	Mediator of RNA polymerase II transcription subunit 25	MED25	91379000	87294000	80221000	95966000	115870000	119400000	98697000	133490000	112860000	155800000	162040000	119590000
M0QZR4;Q92888;Q92888-3;Q92888-2;Q92888-4;M0QYC1;M0R2C7;M0QYS3;M0QZH8;M0R3H5;M0QXV6	Rho guanine nucleotide exchange factor 1	ARHGEF1	1882000000	1887400000	1922200000	1469900000	1470200000	1273700000	1949900000	2053100000	2131200000	1582500000	1589800000	1565800000
M0R0F0;P46782;M0R0R2;M0QZN2	40S ribosomal protein S5;40S ribosomal protein S5, N-terminally processed	RPS5	9616900000	7170300000	8533000000	7053700000	5681400000	4923300000	7928600000	10082000000	9088800000	9251500000	6683900000	8177400000
M0R0K9		TRIM28	8311600	8875800	0	12461000	0	0	14713000	0	18841000	28183000	0	35623000
M0R0P8;Q13459;M0R300;Q13459-2;M0R2J3;M0QXP0;M0QZY4;M0R240;M0R332	Unconventional myosin-IXb	MYO9B	996350000	893510000	1020900000	1057000000	1073600000	1086100000	759080000	955560000	833450000	939880000	1025400000	961070000
M0R204;M0R0S2;M0R2P6;Q8TBC3;M0QYB1;M0R0E3;M0QZF4;M0R0S1	SH3KBP1-binding protein 1	SHKBP1	0	18254000	21663000	33965000	31251000	30737000	21739000	18976000	19313000	41078000	0	27050000
Q9NPR9;M0R1G1;M0QYF6	Protein GPR108	GPR108	11741000	16003000	25490000	39673000	45941000	45650000	0	0	0	13534000	44441000	37120000
M0R226;Q9BQ48	Ribosomal protein L34;39S ribosomal protein L34, mitochondrial	MRPL34	47552000	45046000	48563000	43629000	46297000	36049000	52511000	48068000	47824000	41872000	47832000	0
M0R2A0;Q5UCC4-2;Q5UCC4	ER membrane protein complex subunit 10	EMC10	95605000	76026000	116150000	106880000	87285000	108230000	83796000	92682000	71160000	96160000	72038000	97895000
M0R2B7;P28340;M0QZR8;A0A2R8Y7K6;A0A2R8Y705;M0QXE6;M0QXQ2;M0QZB4;M0R3H8;M0R2I8	DNA polymerase;DNA polymerase delta catalytic subunit	POLD1	1441800000	1403700000	1400900000	844800000	809890000	876870000	1336600000	1262000000	1428900000	1143100000	1108400000	1172800000
M0R2L2		TBC1D17	19144000	19911000	0	0	0	0	21432000	27780000	0	0	0	0
M0R2S1;M0R1M6		UBA52	0	5561200	6118800	6306700	0	0	0	9104500	0	7557000	6074500	6647000
M0R2Z9;Q8IX01;Q8IX01-4;Q8IX01-3;M0R3F6;M0R216;M0R065;M0R2Y3	SURP and G-patch domain-containing protein 2	SUGP2	2882300000	2591900000	2851600000	2719200000	2569100000	2678100000	2101200000	2465100000	2241500000	2974000000	2548600000	2963400000
M0R353;Q6NSJ2-2;Q6NSJ2	Pleckstrin homology-like domain family B member 3	PHLDB3	14780000	17195000	14331000	0	5729400	3575000	8240300	8138600	10034000	0	0	0
M0R3D4;Q9UI14;M0QXH1;M0R1H9	Prenylated Rab acceptor protein 1	RABAC1	251670000	170330000	193010000	248060000	283880000	262950000	170860000	175040000	161730000	176850000	151960000	0
O00115;O00115-2;K7ENE5	Deoxyribonuclease-2-alpha	DNASE2	422480000	529710000	415800000	1087300000	960500000	969880000	319310000	352430000	393600000	590120000	642160000	717790000
O00116;A0A1B0GWA2;A0A2R8YEL0;B8ZZ81	Alkyldihydroxyacetonephosphate synthase, peroxisomal	AGPS	9475200000	9021900000	9332600000	6848900000	6911400000	7069600000	10101000000	10276000000	9946300000	5718600000	5923300000	6589800000
O00139-5;O00139;O00139-4;O00139-1;H0Y8H2	Kinesin-like protein KIF2A	KIF2A	1071500000	885170000	1095700000	1636000000	1686200000	1619600000	889430000	994260000	893550000	1560200000	1561400000	1594200000
O00139-2	Kinesin-like protein KIF2A	KIF2A	29256000	25767000	26879000	63419000	57948000	73167000	20568000	24158000	22131000	29165000	22750000	27733000
O00148;O00148-2;O00148-3;K7EQN7;K7EPJ3;K7EN69;K7ENP6;K7EL56;K7EIL8	ATP-dependent RNA helicase DDX39A	DDX39A	3953900000	4334500000	3649300000	2314400000	2361800000	2286700000	4049100000	3906100000	4064900000	3262800000	3219800000	3006600000
O00151	PDZ and LIM domain protein 1	PDLIM1	6914500000	7465500000	7150500000	8974300000	9298700000	9051000000	8551500000	8916100000	9327400000	10082000000	10919000000	10162000000
O00154-4;O00154-6;O00154-7;O00154;O00154-5;K7EKP8;O00154-2;O00154-3	Cytosolic acyl coenzyme A thioester hydrolase	ACOT7	692490000	766570000	740460000	577770000	575080000	550960000	754480000	690990000	720130000	962520000	1072600000	870540000
O00159-2;I3L204;I3L3Y6;I3L3F5	Unconventional myosin-Ic	MYO1C	2214700000	2093300000	2193600000	3408000000	3393100000	3376000000	2639100000	2495700000	2574800000	3358800000	3552700000	3523500000
O00161;H3BM38;O00161-2;H3BNE1;H3BR18;H3BPJ0;H3BV99;H3BP15;H3BQY9;H3BNG6;H3BU94;H3BR99	Synaptosomal-associated protein 23;Synaptosomal-associated protein	SNAP23	913510000	781910000	802400000	927790000	833840000	853310000	726170000	718050000	737600000	587480000	522150000	606580000
O00165;O00165-2;O00165-5;O00165-3;E9PIQ7;Q5VYD6;O00165-4;O00165-6	HCLS1-associated protein X-1	HAX1	867010000	740120000	931260000	936230000	973130000	991570000	985650000	1046200000	979200000	965910000	916030000	965110000
O00170;E9PMH2;V9GYQ3	AH receptor-interacting protein	AIP	2826000000	3280500000	3357500000	2959000000	3014800000	2850800000	3039300000	3232800000	3305500000	1954700000	2268000000	1813900000
O00178;B0QY59;F5H716;F5H257;F8WAZ4	GTP-binding protein 1	GTPBP1	1174500000	1011600000	1108200000	1988800000	2060500000	2303000000	939400000	1062100000	928600000	1877600000	1984800000	2258000000
O00186	Syntaxin-binding protein 3	STXBP3	649530000	682190000	626330000	690760000	770120000	802240000	707360000	628770000	626850000	653300000	811970000	739730000
O00193;E9PM92;E9PQA1;E9PRZ9	Small acidic protein	SMAP;C11orf58	1053600000	1210800000	1232400000	1776400000	1797400000	1772700000	1285700000	1039200000	1061500000	1387600000	1564500000	1620100000
O00203-3;O00203;A0A2R8Y2A8;Q13367;Q13367-4;Q13367-3;F5GWU4;F5GYB0;H0YBD0	AP-3 complex subunit beta-1	AP3B1	2212000000	2181800000	2302900000	2514900000	2877500000	2586100000	2109200000	2191700000	2387700000	2608600000	2745100000	2626600000
O00214;O00214-2;E9PN19;F6V2D4;H7BXD8;B1ANM0;Q5T3P9;E9PJ77;E9PRN3;E9PPL1;E9PNC2	Galectin-8;Galectin	LGALS8	289610000	226550000	314590000	310510000	364600000	355940000	700270000	758020000	701140000	1190500000	1184600000	1250000000
O00221;Q7LC14;H3BNC2	NF-kappa-B inhibitor epsilon	NFKBIE	31777000	50315000	24235000	52274000	36908000	37352000	70530000	76044000	92770000	98740000	139510000	55690000
O00231;O00231-2;J3QRY4;J3QS13;J3KSW3	26S proteasome non-ATPase regulatory subunit 11	PSMD11	10207000000	10069000000	10578000000	11052000000	11765000000	10559000000	10249000000	10435000000	10648000000	9890000000	10935000000	10410000000
O00232;O00232-2;J3KTJ5;J3KSK1	26S proteasome non-ATPase regulatory subunit 12	PSMD12	5015900000	5632300000	5245900000	4744400000	4992100000	4590700000	5286500000	4796300000	4860600000	4392600000	4772800000	5229100000
O00233;J3KN29;F5H5V4;F5GX23;O00233-2;F5H7X1;O00233-3;F5H169	26S proteasome non-ATPase regulatory subunit 9	PSMD9	740940000	648850000	550720000	643190000	621180000	676570000	643270000	708930000	638420000	847180000	591830000	760190000
O00255-2;E7EN32;O00255;O00255-3;E7ENS2;E7EPR4;E7ET29	Menin	MEN1	46769000	38258000	39233000	59196000	59994000	54436000	47317000	37028000	38069000	38120000	52358000	60081000
O00257;O00257-3;F8WCW6;I3L4F1	E3 SUMO-protein ligase CBX4	CBX4	96250000	74981000	76250000	157030000	148020000	123910000	41582000	54523000	58932000	77779000	111070000	77710000
O00264;O00264-2	Membrane-associated progesterone receptor component 1	PGRMC1	5171700000	2810500000	5480400000	5671800000	6025600000	5794700000	2193000000	3791600000	2509200000	3953000000	3978900000	4132100000
O00267;M0QYL9;M0R105;M0R2M5	Transcription elongation factor SPT5	SUPT5H	0	0	0	27822000	0	0	0	0	18385000	21732000	52232000	34426000
O00267-2	Transcription elongation factor SPT5	SUPT5H	3456700000	3641900000	3293900000	3290200000	3185200000	3095700000	3753000000	3478700000	3729100000	3337300000	3673400000	3337100000
O00268;A0A0G2JRY5;V9GY03;V9GY14;J3KTH2;Q92750	Transcription initiation factor TFIID subunit 4	TAF4	123730000	116720000	138490000	114430000	84773000	147110000	122490000	132510000	120700000	146060000	128170000	140550000
O00273;O00273-2;K7ERT1	DNA fragmentation factor subunit alpha	DFFA	975480000	1024600000	1020000000	1093600000	1179100000	920730000	949780000	932620000	1001300000	1480400000	1547400000	1445800000
O00287	Regulatory factor X-associated protein	RFXAP	0	0	0	23353000	22114000	37769000	8155900	9148100	0	14180000	0	9902100
O00291-3;O00291-4;O00291	Huntingtin-interacting protein 1	HIP1	31355000	41885000	32346000	64576000	55858000	46699000	42021000	28622000	32774000	75357000	42255000	60786000
O00299	Chloride intracellular channel protein 1	CLIC1	12897000000	12877000000	12235000000	12751000000	12762000000	15040000000	15628000000	15139000000	15112000000	19103000000	19875000000	15856000000
O00303;H0YDT6;E9PQV8;A0A1W2PP79	Eukaryotic translation initiation factor 3 subunit F	EIF3F	6039600000	6982800000	5615800000	5157500000	5284300000	4692100000	6184200000	6123200000	6648100000	6017400000	6550000000	5857300000
O00308;H3BS79;O00308-4;O00308-3;O00308-2;H3BPJ8;H3BRX8	NEDD4-like E3 ubiquitin-protein ligase WWP2	WWP2	19781000	20300000	20658000	20521000	17403000	20777000	18944000	16891000	31293000	22847000	11092000	16346000
O00311	Cell division cycle 7-related protein kinase	CDC7	0	0	0	0	0	0	0	0	0	0	0	14920000
O00330-3;O00330;H0YD97;O00330-2;E9PLU0;E9PRI6	Pyruvate dehydrogenase protein X component, mitochondrial	PDHX	1193000000	1208700000	1103900000	874040000	820260000	877020000	1248700000	1122900000	1128000000	818450000	763440000	964490000
O00399;E5RIK5;E5RGW9;E5RFU3;E5RK00	Dynactin subunit 6	DCTN6	180950000	145060000	128470000	134460000	102940000	65561000	82169000	201420000	269800000	115840000	138130000	140450000
O00400;A0A2R8Y5I5;A0A2R8YEX5;A0A2R8Y359;H7C532;A0A2R8Y6H1;A0A2R8YF57;H7C562;H7C577	Acetyl-coenzyme A transporter 1	SLC33A1	227410000	114610000	200050000	161050000	127360000	165510000	67239000	123040000	83260000	94919000	118470000	147570000
O00401	Neural Wiskott-Aldrich syndrome protein	WASL	478630000	447660000	508270000	472670000	563150000	515940000	381480000	509070000	447800000	487620000	378710000	391520000
O00410;O00410-3;H0Y8C6;E7ETV3;H0Y3V4;E7EQT5;E7EV12;E7EWK4;E7EX05;E7ESZ1;E7ETV8;C9JZD8;C9JQT6;C9J875;C9JXE0;C9JZ53;F8WF30;C9J583	Importin-5	IPO5	10782000000	12033000000	10925000000	5780800000	6005300000	6269200000	11557000000	10480000000	11535000000	8305500000	8559300000	8563300000
O00410-2	Importin-5	IPO5	29806000	25824000	29508000	23404000	0	0	35623000	18432000	27984000	31175000	0	19751000
O00411;K7EMH3	DNA-directed RNA polymerase, mitochondrial	POLRMT	28496000	10300000	18606000	30892000	30094000	17136000	24863000	36406000	30578000	32028000	22710000	31150000
O00418;H3BRH4	Eukaryotic elongation factor 2 kinase	EEF2K	267450000	289480000	268720000	156580000	117470000	148610000	297630000	229240000	548860000	145700000	40181000	56793000
O00422-2;O00422;H7BZW6;U3KPY7;U3KQ12	Histone deacetylase complex subunit SAP18	SAP18	523000000	523060000	373150000	422420000	387990000	397360000	491700000	447520000	432080000	398950000	376960000	583610000
O00425;O00425-2;F8WD15	Insulin-like growth factor 2 mRNA-binding protein 3	IGF2BP3	4724200000	4175500000	4614000000	5113000000	5170500000	4776800000	4140800000	4298600000	4167700000	4678900000	4243300000	4549500000
O00429;O00429-3;O00429-6;O00429-5;O00429-7;F8VZ52;B4DPZ9;B4DDQ3;F8W1W3;F8VUJ9;F8VR28;F8VYL3;H0YHY4;H0YI79	Dynamin-1-like protein	DNM1L	2571200000	2932000000	2872300000	3938600000	4096900000	4096900000	2827300000	2766500000	2852100000	3912900000	4184600000	3663600000
O00429-2;O00429-4;O00429-8;G8JLD5	Dynamin-1-like protein	DNM1L	39066000	36665000	35787000	39050000	41291000	37221000	24357000	35413000	30797000	24151000	38276000	45842000
O00442-2;O00442;A6NIC1	RNA 3-terminal phosphate cyclase	RTCA	614250000	647590000	671650000	924430000	1032800000	925170000	720390000	577400000	689020000	920550000	1209000000	1097300000
O00443;A0A0C4DGF9;O00443-2;E9PPP3	Phosphatidylinositol 4-phosphate 3-kinase C2 domain-containing subunit alpha	PIK3C2A	539310000	469750000	583900000	507890000	494490000	519360000	510690000	543930000	579060000	500200000	476290000	510230000
O00458;O00458-2;C9JA65;H0YEE3;E9PMY4;C9JNM6;C9JLG5	Interferon-related developmental regulator 1	IFRD1	43534000	40926000	53128000	289750000	329390000	348370000	45275000	47593000	57400000	269190000	196340000	321550000
O00459;E9PFP1;V9GYJ4	Phosphatidylinositol 3-kinase regulatory subunit beta	PIK3R2	247260000	300230000	272970000	210760000	227640000	220120000	243090000	252990000	253220000	196820000	229840000	206140000
O00461;F8W785	Golgi integral membrane protein 4	GOLIM4	552900000	388660000	593790000	601610000	477510000	369620000	468160000	543290000	481880000	570610000	378970000	420650000
O00468-6;O00468-7;A0A494C0G5;O00468-3;O00468-5;O00468-4;O00468;A0A087X208;A0A494C1I6;O00468-2	Agrin;Agrin N-terminal 110 kDa subunit;Agrin C-terminal 110 kDa subunit;Agrin C-terminal 90 kDa fragment;Agrin C-terminal 22 kDa fragment	AGRN	356440000	256870000	293110000	952470000	1137900000	1102400000	321160000	328250000	256190000	573420000	628450000	642330000
O00469;C9JXZ0;F8WEW3	Procollagen-lysine,2-oxoglutarate 5-dioxygenase 2	PLOD2	24433000	26376000	23557000	26125000	27898000	27872000	27041000	22162000	0	19420000	0	23734000
O00469-2;E7ETU9;O00469-3	Procollagen-lysine,2-oxoglutarate 5-dioxygenase 2	PLOD2	4808600000	5034800000	4935800000	4668800000	4629800000	4413800000	3781200000	3790200000	3809300000	2639400000	3074400000	2932200000
O00471;A0A0A0MSI8;F8W9B8;G3V4Z7	Exocyst complex component 5	EXOC5	748900000	782230000	671980000	667550000	657380000	845710000	707730000	593460000	669550000	748260000	807740000	770190000
O00478-2;O00478;C9JZT5;C9JUV8;C9J877;C9JQT8;C9JNZ3;C9JVU4;C9J3Q8;E9PJE9	Butyrophilin subfamily 3 member A3	BTN3A3	0	0	0	996940000	928460000	616800000	0	0	23566000	748650000	807890000	462870000
O00479	High mobility group nucleosome-binding domain-containing protein 4	HMGN4	13161000	7085800	7656300	13144000	11370000	8660000	5272200	9545800	7540700	15029000	8562600	7630800
O00481;O00481-4;O00481-2;O00481-3	Butyrophilin subfamily 3 member A1	BTN3A1	0	0	0	57687000	75679000	86781000	0	0	0	48756000	20852000	50971000
O00483	Cytochrome c oxidase subunit NDUFA4	NDUFA4	1126500000	966000000	1190600000	734360000	712050000	777330000	1144800000	1141000000	1078000000	949050000	889460000	1006500000
O00487;C9JW37	26S proteasome non-ATPase regulatory subunit 14	PSMD14	2391600000	2767400000	2685200000	3124000000	3745100000	3299900000	2745900000	2618400000	3056100000	3009800000	3145300000	2804400000
O00488;A9J4F5	Zinc finger protein 593	ZNF593	61879000	79895000	43835000	74257000	32852000	33775000	42976000	40581000	78639000	72934000	48106000	57166000
O00499;O00499-3;O00499-5;O00499-9;O00499-7;O00499-8;O00499-4;O00499-6;O00499-11;O00499-2;O00499-10;A0A0A0MT10;Q9UBW5-2;P49418-2;S4R418;Q9UBW5;Q9UBW5-3;A0A087X188;P49418	Myc box-dependent-interacting protein 1	BIN1	1772100000	1869100000	1828800000	662170000	603150000	719710000	2513900000	2195300000	2301900000	926720000	1088900000	1050200000
O00505;H0Y4S9	Importin subunit alpha-4	KPNA3	540700000	459440000	380810000	541240000	428410000	416750000	469260000	481680000	458010000	406190000	374360000	416340000
O00506;O00506-3;O00506-2;C9J6L2;C9JCC0;C9J232;H7C279;C9JDH9;C9JJV0;C9JFA1;C9JN58;E7EM58	Serine/threonine-protein kinase 25	STK25	21086000	13956000	23060000	34236000	37762000	32738000	0	29731000	24572000	45707000	30858000	32525000
O00512	B-cell CLL/lymphoma 9 protein	BCL9	5863800	7705700	6492800	13208000	8925200	10801000	4978300	4254500	6091100	7042100	0	8027900
O00534;B4DHS6;O00534-4;O00534-3;O00534-2	von Willebrand factor A domain-containing protein 5A	VWA5A	0	0	0	86076000	64135000	61714000	0	0	0	77007000	39468000	33949000
O00560;O00560-3;O00560-2;G5EA09;B4DHN5;E9PBU7	Syntenin-1	SDCBP	631450000	591380000	541860000	980720000	1105000000	1125400000	581880000	542970000	583920000	657120000	674840000	761600000
O00562-2;O00562;E9PMZ6;E9PMS0;E9PSD1;E9PNU6	Membrane-associated phosphatidylinositol transfer protein 1	PITPNM1	70411000	65708000	68267000	118410000	152960000	117430000	58968000	71449000	59838000	64922000	109260000	92830000
O00566;U3KQ48	U3 small nucleolar ribonucleoprotein protein MPP10	MPHOSPH10	435990000	473060000	496540000	479640000	465500000	461980000	608210000	614740000	554130000	519850000	586460000	510860000
O00567;A0A494C128;Q5JXT2;H0YDU4;H0Y653	Nucleolar protein 56	NOP56	6828500000	5072000000	7283900000	7997800000	8235700000	7265100000	4726600000	7602900000	5607500000	9647300000	8579800000	8530600000
O00625	Pirin	PIR	3405900000	3820900000	3566700000	2492800000	2266300000	2392600000	3485600000	3418200000	3717400000	2373800000	2487100000	2212200000
O00629;H7C4F6	Importin subunit alpha-3	KPNA4	3652100000	3938700000	3765400000	4073100000	3734600000	3738400000	4318500000	4309300000	4372400000	5049000000	4731700000	4204400000
O00743;O00743-3;O00743-2;Q5T1S7	Serine/threonine-protein phosphatase 6 catalytic subunit;Serine/threonine-protein phosphatase 6 catalytic subunit, N-terminally processed	PPP6C	1307000000	1454200000	1179900000	1059100000	1183500000	1171800000	1252200000	1235300000	1374200000	1162800000	951060000	1232400000
O00754-2;O00754;M0QZ24;M0R2P5;M0R174;M0QZG6	Lysosomal alpha-mannosidase;Lysosomal alpha-mannosidase A peptide;Lysosomal alpha-mannosidase B peptide;Lysosomal alpha-mannosidase C peptide;Lysosomal alpha-mannosidase D peptide;Lysosomal alpha-mannosidase E peptide	MAN2B1	1370800000	1528200000	1526000000	4015500000	4558200000	4205100000	1395200000	1592200000	1556600000	3549600000	3645000000	2919800000
O00762;A0A0A0MSE8;O00762-2;O00762-4;K4DI81;A0A087WVK1	Ubiquitin-conjugating enzyme E2 C	UBE2C	158430000	169770000	173500000	77877000	94074000	77658000	147160000	143430000	163030000	84390000	140950000	110400000
O00764;F2Z2Y4;O00764-3;O00764-2;A8MV33	Pyridoxal kinase	PDXK	1882300000	2078700000	1634200000	2359700000	1885100000	1749100000	1717700000	1647600000	1825500000	3221200000	2492900000	3259800000
O00767	Acyl-CoA desaturase	SCD	1014100000	926040000	1085800000	171240000	186450000	199520000	623080000	1147900000	755470000	193160000	182330000	174800000
O14494;O14494-2	Lipid phosphate phosphohydrolase 1	PPAP2A	0	0	0	10472000	14580000	17166000	0	0	0	0	0	3184100
O14497;O14497-2;H0Y488;A0A1B0GTU5;O14497-3;A0A087WUV6;H0YCU6;H0YEW5	AT-rich interactive domain-containing protein 1A	ARID1A	610440000	683140000	623960000	829770000	952470000	902530000	694280000	651220000	661250000	618900000	704440000	620720000
O14521-2;O14521;H0YD96;H0YD41;G3V173;E9PK73;H3BRW5;O14521-4	Succinate dehydrogenase [ubiquinone] cytochrome b small subunit, mitochondrial	SDHD	130850000	81334000	123600000	19994000	14986000	12211000	85694000	109370000	105680000	26669000	36764000	36488000
O14530;O14530-2;B8ZZX4;F8WCJ3;F8WBV5;G3XAJ4	Thioredoxin domain-containing protein 9	TXNDC9	759600000	633180000	656970000	562830000	601690000	587580000	581660000	616800000	665900000	554870000	532210000	639630000
O14545;F8VNX8;F8VVF3;O14545-2;S4R2Z9;F8VWK2	TRAF-type zinc finger domain-containing protein 1	TRAFD1	282180000	249230000	237990000	1522400000	1509700000	1580900000	213760000	207880000	248120000	819620000	815610000	884130000
O14548;E5RJZ1;H0YBD2	Cytochrome c oxidase subunit 7A-related protein, mitochondrial	COX7A2L	102900000	69747000	91300000	96556000	110970000	83968000	95007000	90364000	88928000	76637000	0	71508000
O14556;K7EP73	Glyceraldehyde-3-phosphate dehydrogenase, testis-specific	GAPDHS	46517000	51673000	54031000	39077000	36277000	0	41797000	42118000	40956000	41119000	46159000	0
O14561;I3L505;H3BNK3	Acyl carrier protein, mitochondrial;Acyl carrier protein	NDUFAB1	1696000000	1963400000	1623100000	1167100000	977570000	922850000	1951400000	1787200000	1309600000	1412200000	1327000000	1174200000
O14576-4;O14576-3;O14576-5;O14576-2;O14576;A0A0A0MTG2	Cytoplasmic dynein 1 intermediate chain 1	DYNC1I1	0	0	0	0	0	0	0	0	0	0	169470000	0
O14578;O14578-4;H7BYJ3;O14578-3;O14578-2;F5H4K4	Citron Rho-interacting kinase	CIT	87352000	73846000	86263000	27845000	0	43733000	51379000	78882000	59948000	38667000	40811000	67688000
O14579;M0QXB4;O14579-3;O14579-2;M0R061	Coatomer subunit epsilon	COPE	5755000000	6144800000	5420100000	6342100000	6045400000	5863600000	5466800000	5684100000	5954600000	6072000000	6876400000	6009500000
O14617-5;O14617;O14617-4;O14617-2;O14617-3;A0A2R8Y611;A0A2R8Y4J3;A0A087WYN6;K7ELX8;K7ERW8;A0A2R8YCY8	AP-3 complex subunit delta-1	AP3D1	1707800000	1729500000	1764100000	2097300000	2127400000	2061400000	1626700000	1838800000	1784500000	2227300000	2237100000	2086200000
O14627;A0A087WTJ6;P47902-2;P47902;Q99626	Homeobox protein CDX-4;Homeobox protein CDX-1;Homeobox protein CDX-2	CDX4;CDX1;CDX2	201160000	225670000	196440000	167330000	87724000	142840000	190890000	235620000	242930000	284180000	240780000	166010000
O14641;I3L2N2;I3L2W9;I3L0M7;A0A3B3ITC6;I3L0Z8;Q92997-2;Q92997;P54792-2;P54792;O14640-2;O14640;A0A087WWA7	Segment polarity protein dishevelled homolog DVL-2	DVL2	187240000	167350000	173150000	130780000	200050000	123140000	151960000	144350000	182680000	145450000	102830000	182940000
O14646-2;O14646;H0Y8V4;A0A087WVF4	Chromodomain-helicase-DNA-binding protein 1	CHD1	274630000	260980000	247240000	310950000	307100000	236140000	287440000	262740000	247910000	322580000	391440000	304070000
O14647;O14647-2;A0A1B0GTU9;A0A1B0GTM9;A0A0D9SGK0;B7Z3I4;O14647-3;A0A0D9SFV8;A0A0D9SFA3;A0A0D9SF92;A0A1B0GU59	Chromodomain-helicase-DNA-binding protein 2	CHD2	681100000	566390000	754580000	1009800000	921790000	967590000	474830000	660180000	537230000	988100000	830690000	828780000
O14656;A0A494BZT7;O14656-2	Torsin-1A	TOR1A	191380000	207010000	199160000	253890000	305280000	258030000	167250000	209990000	123770000	204890000	289250000	270010000
O14657;H0Y7C8	Torsin-1B	TOR1B	137720000	123620000	140300000	86716000	97977000	93206000	106980000	84814000	91121000	75657000	0	79362000
O14672;O14672-2;H0YK87;C9J9B4;H3BS53;H0YNC5	Disintegrin and metalloproteinase domain-containing protein 10	ADAM10	885240000	690460000	971040000	1539800000	1770500000	1776000000	731800000	1122000000	757660000	1394400000	1330200000	1502800000
O14686-3;O14686;F8VWW4	Histone-lysine N-methyltransferase 2D	KMT2D	82668000	91918000	98632000	89737000	72448000	65490000	71160000	82599000	72454000	56855000	28104000	50540000
O14732-2;O14732;K7ELF8;K7EL65;Q6PIP6	Inositol monophosphatase 2	IMPA2	628710000	820280000	357750000	114820000	134750000	149420000	671360000	605020000	746910000	260720000	295080000	270970000
O14733;O14733-4;O14733-3;O14733-2	Dual specificity mitogen-activated protein kinase kinase 7	MAP2K7	147460000	113740000	104770000	58835000	62704000	51209000	72035000	61967000	64222000	58077000	54121000	58874000
O14734;H7C5A7;A0A494C0N6;E9PJN0;H0Y698;Q9BR14;E9PMC4;E9PRD4	Acyl-coenzyme A thioesterase 8	ACOT8	169050000	172100000	187850000	46823000	66776000	73863000	143680000	134770000	156280000	103380000	145870000	118680000
O14737;O14737-2;K7EQA1;K7ESJ4;Q3HM38;X6R2P6	Programmed cell death protein 5	PDCD5	1927500000	2129800000	2100400000	1613500000	1759700000	1809300000	2152100000	2031000000	2119400000	1908200000	2157400000	1758600000
O14744;O14744-2;O14744-5;O14744-3;O14744-4;H0YJX6;G3V580;G3V5L5;G3V2X6;C9JSX3;G3V2L6;H0YJ77;H7BZ44;H0YJD3;G3V5T6;H0YJY6;G3V2F5;G3V507	Protein arginine N-methyltransferase 5;Protein arginine N-methyltransferase 5, N-terminally processed	PRMT5	2369300000	2538300000	2343900000	1489200000	1677900000	1588000000	2583100000	2529300000	2590200000	1624000000	1854200000	1882200000
O14745;J3QRP6;O14745-2;J3QRA3	Na(+)/H(+) exchange regulatory cofactor NHE-RF1	SLC9A3R1	11389000000	10611000000	10642000000	3193400000	3085600000	3019000000	9553700000	10039000000	10863000000	4388800000	4278100000	3907200000
O14763;O14763-2;O14763-3	Tumor necrosis factor receptor superfamily member 10B	TNFRSF10B	169850000	163570000	191410000	512090000	668190000	665760000	82259000	69265000	70181000	264250000	245810000	239630000
O14772;O14772-2;A6NHC7;E9PKE1;H0YDF0;A0A3B3ITB1;Q59H18-3;Q59H18-4;Q59H18-1;V9GXZ4;O14772-3;E9PK10;E9PMK0;E9PMM4	Fucose-1-phosphate guanylyltransferase	FPGT	80321000	115870000	75774000	97792000	94383000	89966000	98350000	29420000	80698000	125530000	156830000	152590000
O14773;A0A2R8YD45;A0A2R8YGD1;A0A2R8Y7U1;O14773-2;A0A2R8Y7I4;A0A2R8YD72;A0A2R8YDY1;A0A2R8YE64	Tripeptidyl-peptidase 1	TPP1	2575000000	2443800000	2654000000	3719900000	4108700000	3966600000	2630400000	2866900000	2945100000	3983900000	5688800000	4177100000
O14776-2;O14776;G3V220;Q5VWI1	Transcription elongation regulator 1	TCERG1	2504400000	2358100000	2362500000	2503500000	2570300000	2509600000	2301700000	2328900000	2446500000	2376500000	2214300000	2362800000
O14777;I3L4G3;V9GYM9	Kinetochore protein NDC80 homolog	NDC80	33901000	29882000	25629000	10624000	20911000	0	38996000	42604000	38582000	0	0	16788000
O14787-2;O14787;A0A075B780;K7ESC1;K7ENW1;K7ELC3;K7EMA3;K7ESG1	Transportin-2	TNPO2	615930000	702440000	582580000	901580000	915010000	838480000	758020000	666890000	634480000	745490000	945620000	855290000
O14791;O14791-2;O14791-3;B1AH94;B1AH95;F8WCH3;B1AH96	Apolipoprotein L1	APOL1	0	0	0	136140000	130710000	125750000	0	0	0	22528000	0	40192000
O14802;R4GMX2;Q7Z755	DNA-directed RNA polymerase III subunit RPC1	POLR3A	318800000	244570000	291820000	151310000	145680000	166940000	237180000	295050000	263400000	201890000	188190000	269240000
O14818;O14818-4;H0Y586;Q8TAA3-2;Q8TAA3-5;Q8TAA3;A0A087WYS6;F5GY34	Proteasome subunit alpha type-7	PSMA7	9677700000	10340000000	10832000000	7540200000	8003200000	7813000000	10467000000	11066000000	10411000000	8133700000	9362100000	8843600000
O14818-2	Proteasome subunit alpha type-7	PSMA7	45592000	53149000	50858000	35444000	29657000	0	41603000	42712000	42949000	33351000	33784000	0
O14828;O14828-2	Secretory carrier-associated membrane protein 3	SCAMP3	1297300000	1218100000	1360200000	1262800000	1412600000	1311700000	1466300000	1514600000	1511200000	1328100000	1181600000	1139300000
O14841;A0A087WY99	5-oxoprolinase	OPLAH	458870000	474400000	446730000	455480000	513050000	472480000	477230000	466100000	431110000	615620000	637470000	585990000
O14867;C9IYH8;C9JMP6;C9IYR0;M0QZP0;H7C4B6	Transcription regulator protein BACH1	BACH1	155980000	169200000	155510000	305930000	307290000	329140000	161040000	154140000	151280000	217970000	196970000	194600000
O14874;O14874-2;O14874-3;H3BTL2;H3BS02;H3BNP3;H3BQP2;H3BUV3	[3-methyl-2-oxobutanoate dehydrogenase [lipoamide]] kinase, mitochondrial	BCKDK	239150000	246510000	287160000	211390000	163790000	178550000	205950000	221230000	252680000	176980000	121170000	156120000
O14879	Interferon-induced protein with tetratricopeptide repeats 3	IFIT3	13598000	0	0	1152900000	2777000000	1284700000	102710000	107960000	0	1677800000	5881600000	1900000000
O14880;Q5VV89;Q5VV87	Microsomal glutathione S-transferase 3	MGST3	2148100000	2011600000	2167800000	1329500000	1434800000	1421400000	2651000000	2785300000	2832000000	1793200000	2297800000	2290000000
O14907;A0A087X282	Tax1-binding protein 3	TAX1BP3	172340000	207430000	208110000	231420000	267270000	267970000	244950000	240070000	230330000	357100000	383170000	383590000
O14908;K7EM11;O14908-2;K7ELJ2;A0A2R8Y651;Q8TF64	PDZ domain-containing protein GIPC1	GIPC1	359620000	351520000	381490000	492040000	507710000	499920000	370450000	402820000	419140000	448090000	530470000	568260000
O14910;H0YIA8;H0YI92;J3KN23;Q9HAP6;Q9HAP6-2	Protein lin-7 homolog A	LIN7A	164990000	185680000	153980000	116920000	114920000	126530000	182540000	165740000	153900000	96027000	86105000	176830000
O14920;A0A499FJS7;O14920-2;O14920-4;G3V105;E5RGW5;O14920-3;J3KNS5	Inhibitor of nuclear factor kappa-B kinase subunit beta	IKBKB	99543000	163230000	138440000	261140000	215400000	151280000	162630000	133630000	135040000	129470000	104860000	133720000
Q5SRD1;O14925;B4DDK6	Putative mitochondrial import inner membrane translocase subunit Tim23B;Mitochondrial import inner membrane translocase subunit Tim23	TIMM23B;TIMM23	98615000	49335000	99803000	64380000	76828000	72329000	87311000	104000000	60263000	43935000	96929000	80392000
O14929;O14929-2;F8W9G7;F8WEW1	Histone acetyltransferase type B catalytic subunit	HAT1	2195900000	2507000000	2755500000	1208700000	1357600000	1264900000	2722800000	3014300000	2898700000	1863100000	2087100000	1737900000
O14933;O14933-2;E9PQT7;E9PKW8	Ubiquitin/ISG15-conjugating enzyme E2 L6	UBE2L6	54482000	49239000	56185000	15413000000	15489000000	15555000000	103810000	47943000	43101000	11351000000	16721000000	16079000000
O14936-3;O14936;A0A2U3TZM4;O14936-4;A0A2R8YE77;A0A2U3TZM1;O14936-2;O14936-6;A0A2R8Y6F8;A0A2U3TZN6;A0A2R8YFN5;A0A2R8YEK3;Q5JS74;A0A2R8Y3B3;Q5JS72;O14936-5;Q5JS79;A0A2R8YGH2;A0A2R8YEJ7;A0A2R8Y4K4;A0A2R8Y6D8;A0A2R8Y7X6	Peripheral plasma membrane protein CASK	CASK	1719900000	1446400000	1702400000	1385800000	1386300000	1563200000	1465900000	1650900000	1551200000	1947900000	1949600000	1613600000
O14949	Cytochrome b-c1 complex subunit 8	UQCRQ	1430300000	1119900000	1312400000	529600000	509910000	374500000	1481300000	1326000000	1597600000	877110000	814590000	916970000
O14950	Myosin regulatory light chain 12B	MYL12B	6768000000	7275300000	6981700000	8648300000	9122000000	8726900000	8580700000	8797500000	8163300000	11213000000	11981000000	12104000000
O14957	Cytochrome b-c1 complex subunit 10	UQCR11	55380000	63552000	54827000	41607000	0	0	141580000	58304000	69726000	54943000	57403000	55597000
O14964;O14964-2;I3L1P5;I3L1E3;I3L165;I3L2H4	Hepatocyte growth factor-regulated tyrosine kinase substrate	HGS	1523700000	1506300000	1257300000	1134700000	778190000	805990000	1303700000	1363900000	1530800000	1258100000	886150000	1028900000
O14966;O14966-3;O14966-2	Ras-related protein Rab-7L1	RAB29	33944000	0	22272000	37536000	26938000	39373000	22237000	30192000	24482000	0	0	0
O14967;O14967-2;D6RAZ4	Calmegin	CLGN	1380400000	900330000	1549500000	4391000000	4227900000	4236400000	650680000	1332400000	821170000	3294500000	2615700000	2857900000
O14974;O14974-4;O14974-3;O14974-2;O14974-5;F8VZN8;H0YHI8;A0A3B3ISH4;H0YIS4;H0YIM2;H0YHL8;F8VW28;H0YIS3;A0A0U1RQZ1;H0YIL7	Protein phosphatase 1 regulatory subunit 12A	PPP1R12A	1313900000	1487500000	1382000000	3161200000	3362000000	3261300000	1444300000	1318500000	1456100000	2904500000	2604600000	2701000000
O14975;O14975-2;G3V1R7	Very long-chain acyl-CoA synthetase	SLC27A2	853010000	598700000	1091700000	844800000	771370000	891420000	707210000	1229000000	809780000	1234800000	1024200000	1114700000
O14976;O14976-2;A0A087X1U9;H0Y8H5;D6RAW3;D6RC24;D6RE78;D6RF16;D6RAQ7;H0Y9M4	Cyclin-G-associated kinase	GAK	1686700000	1912900000	1662200000	1288600000	1360200000	1508200000	1798000000	1725500000	1877000000	1293100000	1540300000	1316600000
O14980;C9JKM9;C9J673;C9IZS4;C9JQ02;C9JV99;F8WF71;C9IYM2;C9JF49;H7BZC5	Exportin-1	XPO1	13477000000	16125000000	14507000000	14117000000	15409000000	14302000000	15097000000	13898000000	15113000000	16162000000	18653000000	18221000000
O15014;E7ERY8;O15014-2	Zinc finger protein 609	ZNF609	87910000	79590000	75161000	192730000	168120000	204490000	74715000	71448000	71690000	76355000	68948000	81318000
O15020;O15020-2;A4QPE4;E9PJZ2	Spectrin beta chain, non-erythrocytic 2	SPTBN2	179550000	182090000	160880000	131290000	93341000	167410000	365340000	468970000	455790000	228270000	173850000	229860000
O15027-5;F1T0I1;O15027;O15027-2;O15027-4;O15027-3;A0A3F2YNX0;A0A3F2YNZ0;X6RGP5;A0A0C4DH09;Q8N9G1	Protein transport protein Sec16A	SEC16A	2191000000	2390000000	2164500000	2573900000	2535100000	2562900000	2407000000	2351400000	2487800000	2607800000	3397200000	2543100000
O15031;E2PU09;A6QRG9;A0A087WU36;A6QRH1;H0Y7X5;H0Y6J7;H0YAM9;F5H3A2;B4DHQ7;O60486;Q9Y4D7	Plexin-B2	PLXNB2	1184100000	1143200000	1241300000	992770000	1127500000	1087200000	1186100000	1172800000	1111700000	880580000	989690000	872490000
O15037	Protein KHNYN	KHNYN	18460000	16861000	17356000	0	0	0	7167100	0	7989400	3514300	0	6513400
O15042-2;O15042;E7ET15;O15042-3;H0Y8D9;E7EW00;H7C4V2;C9J5L1;C9JDJ7;U3KPT1	U2 snRNP-associated SURP motif-containing protein	U2SURP	2116000000	2211900000	2248300000	2423100000	2234600000	2308400000	2275300000	2439400000	2286200000	2576300000	2578200000	2606000000
O15047	Histone-lysine N-methyltransferase SETD1A	SETD1A	85421000	106070000	90769000	88381000	88496000	92168000	81737000	87305000	93413000	94895000	74255000	83327000
O15054;O15054-1	Lysine-specific demethylase 6B	KDM6B	118200000	37168000	97427000	122160000	155840000	0	23928000	0	54556000	122390000	126300000	92086000
O15056-2;O15056;O15056-3;A0A1W2PR85;E7ER60;Q5TA15;H7BY56	Synaptojanin-2	SYNJ2	0	0	44641000	72816000	39136000	35189000	0	38279000	0	35796000	0	0
O15062	Zinc finger and BTB domain-containing protein 5	ZBTB5	10134000	11555000	0	0	0	0	0	8784600	0	10095000	8236200	16786000
O15063;A0A0G2JQ76	Uncharacterized protein KIAA0355	KIAA0355	0	0	0	0	0	0	0	0	0	0	0	14123000
O15066;O15066-2	Kinesin-like protein KIF3B;Kinesin-like protein KIF3B, N-terminally processed	KIF3B	188740000	161920000	176290000	335810000	342440000	260360000	96836000	155130000	92103000	201200000	125690000	156970000
O15067;H0YGH1;J3QSG0;J3QSH6;J3KTL4;J3KT98;J3QL39;J3KTQ5	Phosphoribosylformylglycinamidine synthase	PFAS	9784500000	10909000000	9992800000	5321300000	5448200000	5028500000	9842700000	9763700000	10220000000	5862600000	5891800000	5363800000
O15084;O15084-4;O15084-1;O15084-2	Serine/threonine-protein phosphatase 6 regulatory ankyrin repeat subunit A	ANKRD28	964420000	1096100000	833370000	797800000	691250000	708890000	1018200000	1020500000	1139100000	835780000	700220000	818020000
O15085;O15085-2	Rho guanine nucleotide exchange factor 11	ARHGEF11	49665000	103580000	133000000	30325000	48338000	26752000	108200000	71645000	89522000	55918000	21216000	57425000
O15091-2;O15091;O15091-4;O15091-3;A0A0A0MTQ0	Mitochondrial ribonuclease P protein 3	KIAA0391	121070000	123230000	172110000	107910000	118210000	128110000	170570000	157850000	162700000	130260000	151820000	93690000
O15111	Inhibitor of nuclear factor kappa-B kinase subunit alpha	CHUK	517220000	542330000	501770000	439060000	467480000	461990000	482690000	495190000	558080000	504790000	529330000	503460000
O15116;E5RJ47;E5RH18	U6 snRNA-associated Sm-like protein LSm1	LSM1	421510000	423190000	452290000	373600000	461790000	429440000	424980000	507320000	456320000	491290000	620300000	530880000
O15118;K7EQ23;O15118-2;K7ERM4;K7ERW2	Niemann-Pick C1 protein	NPC1	380570000	349410000	379340000	923800000	1004700000	722440000	277410000	337450000	282880000	388650000	423760000	474970000
O15120;O15120-2	1-acyl-sn-glycerol-3-phosphate acyltransferase beta	AGPAT2	115240000	73540000	161850000	109620000	127300000	128200000	70237000	105280000	93126000	114440000	147970000	132230000
O15121	Sphingolipid delta(4)-desaturase DES1	DEGS1	72572000	45408000	80076000	58898000	49779000	52089000	24277000	62050000	24220000	59311000	0	0
O15126;A0A087WXB0;A0A087WZA6;O15126-2;A0A087WTX8;A0A087WU14	Secretory carrier-associated membrane protein 1	SCAMP1	412040000	410720000	385090000	478330000	529950000	498040000	426800000	420070000	419480000	481360000	395000000	405130000
O15127;H3BV04;H3BN93;H3BUB6;H3BPL9	Secretory carrier-associated membrane protein 2	SCAMP2	755790000	697770000	868670000	702780000	662970000	803120000	775230000	827810000	794420000	766300000	803450000	702840000
O15143;C9JEY1;C9K057;C9JBJ7;C9J4Z7;F8VXW2;C9JQM8;C9JFG9;C9J6C8;C9JTT6;C9JM51;F8WEB3	Actin-related protein 2/3 complex subunit 1B	ARPC1B	841020000	765310000	734280000	976700000	1058300000	918950000	741310000	696330000	715520000	1161200000	1303400000	1203700000
O15144;H7C3F9;C9JTV5;G5E9J0;G5E9S7	Actin-related protein 2/3 complex subunit 2	ARPC2	7287700000	7513500000	7309200000	9847400000	11602000000	11115000000	7355200000	7425100000	7173400000	9246900000	9975000000	8827700000
O15145;C9JZD1;F8VR50	Actin-related protein 2/3 complex subunit 3	ARPC3	2032700000	2063800000	1847100000	1876200000	1619300000	1558100000	1696400000	1621800000	1948800000	2001300000	1445000000	1453300000
O15160;A0A2R8YEZ4;A0A2R8Y5D3;O15160-2;A0A2R8YEY5;E7EQB9;D6RDJ3;A0A2R8Y8D6;H0Y723	DNA-directed RNA polymerases I and III subunit RPAC1	POLR1C	528380000	642230000	616210000	419000000	404140000	377870000	665990000	772110000	634450000	502000000	515490000	481960000
O15164;O15164-2	Transcription intermediary factor 1-alpha	TRIM24	470470000	468020000	476920000	376050000	380850000	410250000	460820000	416170000	441240000	299900000	287490000	300170000
O15173;O15173-2;U3KQM0;D3DNX8	Membrane-associated progesterone receptor component 2	PGRMC2	1078700000	710670000	1261600000	1326500000	1252100000	1317500000	730040000	1295600000	765550000	1095800000	1478400000	1389400000
O15212;A2AB88	Prefoldin subunit 6	PFDN6	2468200000	2557300000	2400300000	1581200000	1525400000	1873300000	2790900000	2655200000	2594400000	2270400000	2600100000	1975200000
O15213;H0Y6G3	WD repeat-containing protein 46	WDR46	282290000	180120000	320700000	306120000	333990000	300610000	178610000	373680000	232330000	363990000	395210000	331980000
O15226;O15226-2	NF-kappa-B-repressing factor	NKRF	935690000	738990000	996270000	748800000	796730000	742980000	704150000	756440000	775860000	843020000	613200000	765070000
O15228;O15228-2;Q5TBH8;Q5TBH6;A0A2R8YH69	Dihydroxyacetone phosphate acyltransferase	GNPAT	2608100000	2843600000	2769600000	1434000000	1399000000	1574900000	3746300000	3478900000	3633800000	2180600000	2286700000	2534300000
O15230;O15230-2;A0A087WYH7;A0A075B783;A0A0A0MSA0;Q16787-3;Q16787	Laminin subunit alpha-5	LAMA5	276990000	393290000	312490000	498460000	518820000	495600000	337190000	323910000	323980000	388630000	352590000	336490000
O15234;J3KSY7	Protein CASC3	CASC3	85389000	110080000	111600000	88572000	78555000	92546000	117840000	103450000	105950000	114220000	87848000	119700000
O15235	28S ribosomal protein S12, mitochondrial	MRPS12	187080000	157160000	195100000	234720000	224440000	231880000	203670000	226010000	214980000	230070000	282130000	217130000
O15239	NADH dehydrogenase [ubiquinone] 1 alpha subcomplex subunit 1	NDUFA1	29570000	0	0	53215000	68890000	99094000	38415000	20774000	29634000	0	117240000	0
O15254;O15254-2;D6RJ89	Peroxisomal acyl-coenzyme A oxidase 3	ACOX3	1127200000	1177300000	1192300000	930000000	1048000000	1282400000	1260200000	1261300000	1407900000	1353700000	1478800000	1334500000
O15258;Q5T092;A0A0A0MR06;Q5T091;Q5T093	Protein RER1	RER1	434390000	355340000	480180000	421750000	347590000	465360000	389340000	415080000	324340000	469720000	547510000	339590000
Q5T8U5;O15260-2;O15260;O15260-3	Surfeit locus protein 4	SURF4	3024300000	1560400000	3063700000	2300800000	2458100000	2911100000	1550600000	2263800000	1534900000	2223900000	1995900000	2428900000
O15264;O15264-2;Q5R3E6	Mitogen-activated protein kinase 13	MAPK13	43259000	74437000	91962000	105810000	78538000	100850000	148520000	111300000	131330000	166050000	136770000	133670000
O15269;A0A2R8Y4S0;A0A2R8Y6A2;O15269-2;A0A2R8Y763	Serine palmitoyltransferase 1	SPTLC1	583330000	617780000	576550000	482190000	444420000	526800000	464910000	544410000	440380000	543650000	369170000	529320000
O15270;H0YJV2	Serine palmitoyltransferase 2	SPTLC2	71194000	63133000	81471000	106950000	99681000	125520000	70074000	61581000	81163000	95476000	168230000	92422000
O15294;O15294-3;O15294-2;O15294-4;C9JZL3	UDP-N-acetylglucosamine--peptide N-acetylglucosaminyltransferase 110 kDa subunit	OGT	1847400000	1849500000	1729900000	1387500000	1282200000	1248300000	1972700000	1792500000	1982900000	1205300000	1073000000	1266100000
O15305;H3BV55;H3BPH4;H3BRM0;O15305-2;H3BR08;H3BM92;H3BV34;H3BT06;H3BNY9	Phosphomannomutase 2;Phosphomannomutase	PMM2	1118600000	1169200000	1055700000	1042800000	1211300000	1268000000	1104700000	1010600000	1052000000	1186000000	987420000	377830000
O15344;O15344-2;C9J453;A0A087X255;A0A087X0X0;C9JZJ7	E3 ubiquitin-protein ligase Midline-1	MID1	301030000	322220000	281220000	67006000	47860000	8376300	393830000	229990000	368890000	88893000	13162000	129810000
O15355	Protein phosphatase 1G	PPM1G	2423400000	2587800000	2468300000	2388400000	2366100000	2297600000	2315900000	2312300000	2483800000	2398900000	2349700000	2475700000
O15357;O15357-2;A0A0A0MTP6;F5GY16;H7BXR2;H0YFZ4	Phosphatidylinositol 3,4,5-trisphosphate 5-phosphatase 2	INPPL1	387730000	364710000	358740000	450920000	459760000	429650000	304190000	320180000	323420000	351020000	360230000	370390000
O15371-3;O15371;O15371-2;B0QYA5;B0QYA6;B0QYA4;B0QYA8	Eukaryotic translation initiation factor 3 subunit D	EIF3D	4553000000	5004600000	5030500000	4275100000	4528100000	5167700000	5263100000	5453300000	5272400000	5213800000	5791200000	5315900000
O15379;O15379-2;E7ESJ6;E7EW19	Histone deacetylase 3	HDAC3	171230000	191770000	161720000	162050000	132860000	129440000	219240000	174150000	196260000	209500000	237780000	117180000
O15381;O15381-2;O15381-5;O15381-3;O15381-4;E9PH71;C9J6P7;E7EWK7;C9JP83;E9PGD8;F8WF01	Nuclear valosin-containing protein-like	NVL	127240000	107630000	103360000	166210000	181360000	155060000	87963000	108230000	100760000	123440000	161170000	113960000
O15397;O15397-2;F5H244;F5H2I3;H0YH64	Importin-8	IPO8	137400000	130480000	116630000	180280000	170360000	150480000	102620000	121630000	128050000	102170000	67102000	90200000
O15400-2;O15400	Syntaxin-7	STX7	927110000	912560000	1072700000	1243800000	1217800000	1238200000	1075500000	1041800000	1100200000	1144800000	1388400000	1164500000
O15427;J3QQV2;J3QSC3;J3QQS9;J3QLE3;J3KTM6;J3QRU2;J3KT83;J3QRA0;J3KTI8;J3QRP8	Monocarboxylate transporter 4	SLC16A3	692440000	547920000	603980000	848160000	718550000	808410000	373250000	457990000	406140000	503610000	307820000	376290000
O15431	High affinity copper uptake protein 1	SLC31A1	73346000	53831000	76776000	80144000	86573000	119960000	64446000	65355000	52874000	61333000	0	0
O15439;O15439-2;A0A2R8Y6V8;O15439-3;O15439-4;A0A2R8YDC1	Multidrug resistance-associated protein 4	ABCC4	71019000	71508000	81025000	86869000	100460000	110090000	94740000	122040000	84292000	174560000	178090000	152530000
O15446;O15446-2	DNA-directed RNA polymerase I subunit RPA34	CD3EAP	219920000	246050000	268730000	205980000	135580000	178610000	266780000	306190000	282480000	251000000	288710000	270220000
O15455;D6RA51;O15455-2	Toll-like receptor 3	TLR3	0	0	0	61378000	87086000	73903000	0	0	0	66935000	44547000	41969000
O15460-2;O15460;C9JX45;A8MXE0;E7ERI1;E7ENX0;E7EPI9;C9JCP0;C9JN43;C9JIG4;C9JFJ1	Prolyl 4-hydroxylase subunit alpha-2	P4HA2	1672600000	1736400000	1752300000	2693700000	2674600000	2922700000	1693600000	1490300000	1545500000	2168000000	2318700000	2054700000
O15479;O15481;Q96LZ2;P43366;Q9UBF1	Melanoma-associated antigen B2	MAGEB2	350870000	306980000	341290000	491340000	482430000	528290000	228940000	287910000	277240000	425980000	426670000	399440000
O15498;O15498-2;H7C3K7	Synaptobrevin homolog YKT6	YKT6	814230000	732270000	943720000	1208700000	1232100000	1264800000	630750000	741110000	668250000	1418600000	1408900000	1457000000
[truncated: 5,492 more rows]

## Sheet: JeKo-1_CAR-T
Protein IDs	Protein names	Gene names	LFQ intensity 20230912_MP096_IaVo_SA_IVS385_Jeko_NTCTRL_1	LFQ intensity 20230912_MP096_IaVo_SA_IVS385_Jeko_NTCTRL_2	LFQ intensity 20230912_MP096_IaVo_SA_IVS386_Jeko_NTCTRL_3	LFQ intensity 20230912_MP096_IaVo_SA_IVS386_Jeko_NTCTRL_4	LFQ intensity 20230912_MP096_IaVo_SA_IVS387_Jeko_NTCTRL_4	LFQ intensity 20230912_MP096_IaVo_SA_IVS387_Jeko_NTCTRL_6	LFQ intensity 20230912_MP096_IaVo_SA_IVS388_Jeko_RNF19B_1	LFQ intensity 20230912_MP096_IaVo_SA_IVS388_Jeko_RNF19B_2	LFQ intensity 20230912_MP096_IaVo_SA_IVS389_Jeko_RNF19B_3	LFQ intensity 20230912_MP096_IaVo_SA_IVS389_Jeko_RNF19B_4	LFQ intensity 20230912_MP096_IaVo_SA_IVS390_Jeko_RNF19B_5	LFQ intensity 20230912_MP096_IaVo_SA_IVS390_Jeko_RNF19B_6	LFQ intensity 20230912_MP096_IaVo_SA_IVS391_Jeko_NTCTRL_3dCTl019_1	LFQ intensity 20230912_MP096_IaVo_SA_IVS391_Jeko_NTCTRL_3dCTl019_2	LFQ intensity 20230912_MP096_IaVo_SA_IVS392_Jeko_NTCTRL_3dCTl019_3	LFQ intensity 20230912_MP096_IaVo_SA_IVS392_Jeko_NTCTRL_3dCTl019_4	LFQ intensity 20230912_MP096_IaVo_SA_IVS393_Jeko_NTCTRL_3dCTl019_5	LFQ intensity 20230912_MP096_IaVo_SA_IVS393_Jeko_NTCTRL_3dCTl019_6	LFQ intensity 20230912_MP096_IaVo_SA_IVS394_Jeko_RNF19B_3dCTl019_1	LFQ intensity 20230912_MP096_IaVo_SA_IVS394_Jeko_RNF19B_3dCTl019_2	LFQ intensity 20230912_MP096_IaVo_SA_IVS395_Jeko_RNF19B_3dCTl019_3	LFQ intensity 20230912_MP096_IaVo_SA_IVS395_Jeko_RNF19B_3dCTl019_4	LFQ intensity 20230912_MP096_IaVo_SA_IVS396_Jeko_RNF19B_3dCTl019_5	LFQ intensity 20230912_MP096_IaVo_SA_IVS396_Jeko_RNF19B_3dCTl019_6
A0A024QZ33;Q9H0G5;K7ERM9;K7EK40;K7EMD8	Nuclear speckle splicing regulatory protein 1	CCDC55;NSRP1	45983000	52019000	19938000	22181000	27743000	46952000	48670000	28228000	36507000	28371000	32674000	40750000	31807000	0	49751000	35229000	30708000	27061000	31685000	24163000	29485000	39729000	30896000	34309000
H3BR00;Q2TA70;A0A1B0GWD3;A0A0A0MRC7;B4DFF3;Q9UBD8;A0A1B0GW34;A0A1B0GV71;A0A0D9SFH9;O95086;H3BNK7;A0A024QZB8;Q13286-4;Q13286-2;Q13286-5;Q13286-7;Q13286-3;Q13286	Battenin	CLN3	6405700	7938500	0	0	0	0	0	0	0	0	0	0	0	0	0	0	0	0	0	0	0	0	0	0
A0A024QZX5;A0A087X1N8;P35237;A0A2R8YD12;A0A2R8Y6A7;A0A2R8YDD0;A0A2R8Y517	Serpin B6	SERPINB6	177630000	187400000	230850000	169940000	214080000	203930000	139310000	177470000	170050000	170270000	141910000	154090000	264060000	249900000	339520000	388640000	313540000	285670000	248890000	232200000	224860000	271730000	244590000	238540000
A0A024R1R8;Q9Y2S6	Translation machinery-associated protein 7	hCG_2014768;TMA7	526190000	566370000	1041000000	955150000	1261600000	1246600000	543550000	569170000	404510000	393740000	439410000	549520000	900180000	673560000	209330000	218540000	340030000	302880000	156580000	184380000	191480000	189120000	211390000	197970000
A0A024R216;Q9Y3E1;H3BPQ6;H3BPM9	Hepatoma-derived growth factor-related protein 3	HDGFRP3	70844000	67691000	90602000	97393000	69959000	0	75191000	81532000	73848000	82692000	92562000	78397000	73112000	59596000	91340000	82870000	94776000	99335000	85984000	91278000	103900000	101170000	96880000	98898000
A0A024R442;E7ETB3;Q9ULA0;E7EMB6;C9JBE1;F8WAN0;E5RJ35;C9J1E2;C9JRG3	Aspartyl aminopeptidase	DNPEP	2255100000	2338400000	2061200000	2058700000	2161900000	2240000000	2305700000	2475000000	2288100000	2376700000	2281100000	2232800000	4208200000	4062300000	4102400000	4421400000	3991900000	4203800000	4320600000	4338400000	4054500000	4070700000	4062000000	3870200000
A0A024R4E5;Q00341;Q00341-2;H0Y394;H7C0A4;C9JIZ1;C9J5E5;H7C2D1;H7BZC3;C9JZI8;C9JES8;C9JHZ8;C9JHS7;C9JK79;C9JT62;C9JHN6;C9JEJ8;C9JBS3;C9JQ82;H7C3D0;C9JMQ6	Vigilin	HDLBP	1446300000	1504900000	1625700000	1655500000	1461200000	1474700000	1571300000	1625500000	1350500000	1340400000	1372700000	1405200000	2010700000	1866300000	2037600000	1998700000	2067700000	2040800000	1856000000	1855300000	1966900000	2010400000	1845600000	1881400000
[truncated: 6,564 more rows]

## Sheet: U-343MG_CAR-T
Protein IDs	Protein names	Gene names	LFQ intensity.NTCTRL.1	LFQ intensity.NTCTRL.2	LFQ intensity.NTCTRL.3	LFQ intensity.RNF19.OE.1	LFQ intensity.RNF19.OE.2	LFQ intensity.RNF19.OE.3	LFQ intensity.NTCRL.CART.1	LFQ intensity.NTCRL.CART.2	LFQ intensity.NTCRL.CART.3	LFQ intensity.RNF19B.OE.1	LFQ intensity.RNF19B.OE.2	LFQ intensity.RNF19B.OE.3
[truncated: 7,325 more rows]

[truncated: 4 more sheets: CRISPRi, Huh-7_IFN-y, U-343MG_IFN-y, Huh-7_IFN-B]
