# Supplementary material for: RNF19B confers tumor resistance to CAR T cells
Source: Research Square preprint supplement (doi:10.21203/rs.3.rs-7847831/v1), 2025-10-23
Supplement: Supplementary file 3 [file d83d13c29ffd33aab966a084.xlsx]

## Sheet: DNA_Sequences
DNA constructs and plasmids
Name	Reference	InsertSequence
lenti dCAS-VP64_Blast	Addgene#61425	NA
pZR071_SFFV-dCas9-mCherry-KRAB	Addgene#180264	NA
Lenti-luciferase-P2A-Neo	Addgene#105621	NA
IFNGR1_WT	ENSG00000027697	GCCACCATGGCTCTCCTCTTTCTCCTACCCCTTGTCATGCAGGGTGTGAGCAGGGCTGAGATGGGCACCGCGGATCTGGGGCCGTCCTCAGTGCCTACACCAACTAATGTTACAATTGAATCCTATAACATGAACCCTATCGTATATTGGGAGTACCAGATCATGCCACAGGTCCCTGTTTTTACCGTAGAGGTAAAGAACTATGGTGTTAAGAATTCAGAATGGATTGATGCCTGCATCAATATTTCTCATCATTATTGTAATATTTCTGATCATGTTGGTGATCCATCAAATTCTCTTTGGGTCAGAGTTAAAGCCAGGGTTGGACAAAAAGAATCTGCCTATGCAAAGTCAGAAGAATTTGCTGTATGCCGAGATGGAAAAATTGGACCACCTAAA…
IFNGR1_K279R	In house	GCCACCATGGCTCTCCTCTTTCTCCTACCCCTTGTCATGCAGGGTGTGAGCAGGGCTGAGATGGGCACCGCGGATCTGGGGCCGTCCTCAGTGCCTACACCAACTAATGTTACAATTGAATCCTATAACATGAACCCTATCGTATATTGGGAGTACCAGATCATGCCACAGGTCCCTGTTTTTACCGTAGAGGTAAAGAACTATGGTGTTAAGAATTCAGAATGGATTGATGCCTGCATCAATATTTCTCATCATTATTGTAATATTTCTGATCATGTTGGTGATCCATCAAATTCTCTTTGGGTCAGAGTTAAAGCCAGGGTTGGACAAAAAGAATCTGCCTATGCAAAGTCAGAAGAATTTGCTGTATGCCGAGATGGAAAAATTGGACCACCTAAA…
IFNGR1_K285R	In house	GCCACCATGGCTCTCCTCTTTCTCCTACCCCTTGTCATGCAGGGTGTGAGCAGGGCTGAGATGGGCACCGCGGATCTGGGGCCGTCCTCAGTGCCTACACCAACTAATGTTACAATTGAATCCTATAACATGAACCCTATCGTATATTGGGAGTACCAGATCATGCCACAGGTCCCTGTTTTTACCGTAGAGGTAAAGAACTATGGTGTTAAGAATTCAGAATGGATTGATGCCTGCATCAATATTTCTCATCATTATTGTAATATTTCTGATCATGTTGGTGATCCATCAAATTCTCTTTGGGTCAGAGTTAAAGCCAGGGTTGGACAAAAAGAATCTGCCTATGCAAAGTCAGAAGAATTTGCTGTATGCCGAGATGGAAAAATTGGACCACCTAAA…
IFNGR1_K299R	In house	GCCACCATGGCTCTCCTCTTTCTCCTACCCCTTGTCATGCAGGGTGTGAGCAGGGCTGAGATGGGCACCGCGGATCTGGGGCCGTCCTCAGTGCCTACACCAACTAATGTTACAATTGAATCCTATAACATGAACCCTATCGTATATTGGGAGTACCAGATCATGCCACAGGTCCCTGTTTTTACCGTAGAGGTAAAGAACTATGGTGTTAAGAATTCAGAATGGATTGATGCCTGCATCAATATTTCTCATCATTATTGTAATATTTCTGATCATGTTGGTGATCCATCAAATTCTCTTTGGGTCAGAGTTAAAGCCAGGGTTGGACAAAAAGAATCTGCCTATGCAAAGTCAGAAGAATTTGCTGTATGCCGAGATGGAAAAATTGGACCACCTAAA…
mycGPC3-CAR(codonopt)_Twist_sFFV	In house	GCCACCATGGCCCTCCCAGTGACTGCTCTGCTTCTGCCTCTCGCCCTCCTGCTGCATGCCGCCAGACCCGAGCAGAAGCTTATTAGCGAGGAGGACCTTGACGTCGTGATGACGCAGACCCCGTTGTCACTGCCAGTGTCCCTGGGGGACCAAGCTTCCATCTCTTGCCGCTCAAGTCAATCCCTTGTGCACAGCAATGGAAATACTTACCTGCATTGGTATTTACAGAAACCCGGCCAAAGCCCTAAATTGCTGATCTACAAAGTTTCAAATCGGTTCTCCGGCGTGCCCGACCGTTTCTCAGGGAGTGGCTCTGGGACAGATTTTACGCTGAAAATTTCTCGCGTCGAGGCTGAAGACCTGGGAGTCTACTTCTGCTCCCAGAATACCCACGTGCCT…
CTL019_Twist_sFFV	In house	GCCACCATGGCTCTGCCTGTAACTGCATTATTGTTGCCCCTCGCCCTTCTGCTTCACGCCGCACGACCCGAGCAGAAATTAATATCAGAGGAGGATCTTGACATCCAGATGACACAAACTACTAGCTCACTCTCAGCGTCATTGGGCGACAGGGTGACAATTAGCTGTCGCGCCAGCCAGGATATTTCCAAGTACCTGAACTGGTATCAGCAGAAACCAGATGGCACTGTGAAGCTGCTGATCTATCATACCAGCCGCCTGCATTCTGGAGTCCCTAGCCGTTTTTCCGGAAGCGGCAGCGGAACCGATTACAGCCTGACTATCTCAAATTTAGAACAGGAGGATATCGCCACCTACTTTTGCCAGCAAGGGAACACCCTGCCGTACACTTTCGGTGGT…
pBMN(EF1a-117CAR-GFP) | IL13RA2-CAR	Prof. Magnus Essand (Uppsala University)	GCCACCATGGCCCTGCCTGTGACAGCCCTGCTGCTGCCTCTGGCTCTGCTGCTGCATGCCGCTAGACCCGAGGTGCAGCTGCTGGAGAGCGGCGGCGGCCTGGTGCAGCCCGGCGGCAGCCTGAGGCTGAGCTGCGCCGCCAGCGGCTTCACCTTCAGCGGCAGCTACATGAGCTGGGTGAGGCAGGCCCCCGGCAAGGGCCTGGAGTGGGTGAGCAGCATCTACGGCAGCGGCGGCTACACCTACTACGCCGACAGCGTGAAGGGCAGGTTCACCATCAGCAGGGACAACAGCAAGAACACCCTGTACCTGCAGATGAACAGCCTGAGGGCCGAGGACACCGCCGTGTACTACTGCGCCAGGTACAGCCCCTTCTACATGGACTACTGGGGCCAGGGC…
Primers
Name	5' - sequence - 3'
NTCTRL_sgRNA1_pXPR502_Fwd	CACCGCTGAAAAAGGAAGGAGTTGA
NTCTRL_sgRNA1_pXPR502_Rev	AAACTCAACTCCTTCCTTTTTCAGC
RNF19B_sgRNA1_41375_pXPR502_Fwd	CACCGACTCCTAGACCGGGGCGCAA
RNF19B_sgRNA1_41375_pXPR502_Rev	AAACTTGCGCCCCGGTCTAGGAGTC
RNF19B_sgRNA2_43519_pXPR502_Fwd	CACCGGCCCAGCGCACTCCTAGACC
RNF19B_sgRNA2_43519_pXPR502_Rev	AAACGGTCTAGGAGTGCGCTGGGCC
NTCTRL_sgRNA1_CROPseq_Fwd	CACCGAAAACAGGACGATGTGCGGC
NTCTRL_sgRNA1_CROPseq_Rev	AAACGCCGCACATCGTCCTGTTTTC
RNF19B_sgRNA1_41467_CROPseq_Fwd	CACCGGGCGGTGGTGGCGGCGTCGG
RNF19B_sgRNA1_41467_CROPseq_Rev	AAACCCGACGCCGCCACCACCGCCC
RNF19B_sgRNA2_98464_CROPseq_Fwd	CACCGGGCGGTTGAGGCGGTGGTGG
RNF19B_sgRNA2_98464_CROPseq_Rev	AAACCCACCACCGCCTCAACCGCCC
IFNGR1_sgRNA1_pX458_Fwd	CACCGGGAGTACCAGATCATGCCAC
IFNGR1_sgRNA1_pX458_Rev	AAACGTGGCATGATCTGGTACTCCC
IFNGR1_K279R_Fwd	CCATTGAAGGAACGCAGCATAATATTACC
IFNGR1_K279R_Rev	GGTAATATTATGCTGCGTTCCTTCAATGG
IFNGR1_K285R_Fwd	CATAATATTACCCCGCTCCTTGATCTC
IFNGR1_K285R_Rev	GAGATCAAGGAGCGGGGTAATATTATG
IFNGR1_K299R_Fwd	CTTTAGAGACACGCCCTGAATCAAAATATG
IFNGR1_K299R_Rev	CATATTTTGATTCAGGGCGTGTCTCTAAAG
NGS Sequencing Primers
Name	5' - sequence - 3'	PCR#
P7_common	GGAGTTCAGACGTGTGCTCTTCCGATCTCCACTTTTTCAAGTTGATAACGGACTAGCC	PCR1
P5_0nt_stagger	CTACACGACGCTCTTCCGATCTGCTTTATATATCTTGTGGAAAGGACGAAACACC	PCR1
P5_1nt_stagger	CTACACGACGCTCTTCCGATCTCGCTTTATATATCTTGTGGAAAGGACGAAACACC	PCR1
P5_2nt_stagger	CTACACGACGCTCTTCCGATCTGCGCTTTATATATCTTGTGGAAAGGACGAAACACC	PCR1
P5_3nt_stagger	CTACACGACGCTCTTCCGATCTAGCGCTTTATATATCTTGTGGAAAGGACGAAACACC	PCR1
P5_4nt_stagger	CTACACGACGCTCTTCCGATCTCAACGCTTTATATATCTTGTGGAAAGGACGAAACACC	PCR1
P5_common	AATGATACGGCGACCACCGAGATCTACACTCTTTCCCTACACGACGCTCTTCCG	PCR2
P5_index_1	AATGATACGGCGACCACCGAGATCTACACATTGCTCCACACTCTTTCCCTACACGACGCTCTTCCG	PCR2
P5_index_2	AATGATACGGCGACCACCGAGATCTACACATGTTCGGACACTCTTTCCCTACACGACGCTCTTCCG	PCR2
P7_index_1	CAAGCAGAAGACGGCATACGAGATCGGTTCAAGTGACTGGAGTTCAGACGTGTGCTC	PCR2
P7_index_2	CAAGCAGAAGACGGCATACGAGATATTGGATTGTGACTGGAGTTCAGACGTGTGCTC	PCR2
P7_index_3	CAAGCAGAAGACGGCATACGAGATGCACGACCGTGACTGGAGTTCAGACGTGTGCTC	PCR2
P7_index_4	CAAGCAGAAGACGGCATACGAGATTATGGACCGTGACTGGAGTTCAGACGTGTGCTC	PCR2
P7_index_5	CAAGCAGAAGACGGCATACGAGATCGCAAGAAGTGACTGGAGTTCAGACGTGTGCTC	PCR2
P7_index_6	CAAGCAGAAGACGGCATACGAGATGCGTTCTTGTGACTGGAGTTCAGACGTGTGCTC	PCR2
P7_index_7	CAAGCAGAAGACGGCATACGAGATATACGAGGGTGACTGGAGTTCAGACGTGTGCTC	PCR2
P7_index_8	CAAGCAGAAGACGGCATACGAGATATACAGCCGTGACTGGAGTTCAGACGTGTGCTC	PCR2
P7_index_9	CAAGCAGAAGACGGCATACGAGATCGGTGACCGTGACTGGAGTTCAGACGTGTGCTC	PCR2
P7_index_10	CAAGCAGAAGACGGCATACGAGATTAGTCTGGGTGACTGGAGTTCAGACGTGTGCTC	PCR2
P7_index_11	CAAGCAGAAGACGGCATACGAGATATCACTGGGTGACTGGAGTTCAGACGTGTGCTC	PCR2
P7_index_12	CAAGCAGAAGACGGCATACGAGATCGACGACCGTGACTGGAGTTCAGACGTGTGCTC	PCR2
CRISPRa/CRISPRi/CRISPRko gRNA
Name	5' - sequence - 3'
NTCTRL_sgRNA1_pXPR502	CTGAAAAAGGAAGGAGTTGA
RNF19B_sgRNA1_41375_pXPR502	ACTCCTAGACCGGGGCGCAA
RNF19B_sgRNA2_43519_pXPR502	GCCCAGCGCACTCCTAGACC
NTCTRL_sgRNA1_CROPseq	AAAACAGGACGATGTGCGGC
RNF19B_sgRNA1_41467_CROPseq	GGCGGTGGTGGCGGCGTCGG
RNF19B_sgRNA2_98464_CROPseq	GGCGGTTGAGGCGGTGGTGG
IFNGR1_sgRNA1_pX458	GGAGTACCAGATCATGCCAC

## Sheet: Huh-7_Subset_Library
	V1	V2	V3	fwd_primer	upstream_fragment	downstream_fragment	rev_primer	complete_sequence
762	ACVR1C_762	CCTGCAGCAGCAGGCCCGGG	ACVR1C	CTACAGGTACCGGTCCTGAG	CGTCTCACACCG	GTTTCGAGACG	GTACCTAGCGTGACGATCCG	CTACAGGTACCGGTCCTGAGCGTCTCACACCGCCTGCAGCAGCAGGCCCGGGGTTTCGAGACGGTACCTAGCGTGACGATCCG
772	ACVRL1_772	AGAGGCTGCTGAAGACAGGA	ACVRL1	CTACAGGTACCGGTCCTGAG	CGTCTCACACCG	GTTTCGAGACG	GTACCTAGCGTGACGATCCG	CTACAGGTACCGGTCCTGAGCGTCTCACACCGAGAGGCTGCTGAAGACAGGAGTTTCGAGACGGTACCTAGCGTGACGATCCG
773	ACVRL1_773	GAGGCTGCTGAAGACAGGAG	ACVRL1	CTACAGGTACCGGTCCTGAG	CGTCTCACACCG	GTTTCGAGACG	GTACCTAGCGTGACGATCCG	CTACAGGTACCGGTCCTGAGCGTCTCACACCGGAGGCTGCTGAAGACAGGAGGTTTCGAGACGGTACCTAGCGTGACGATCCG
1626	AKT1_1626	CCCGGGGCGTCCCCACCGCG	AKT1	CTACAGGTACCGGTCCTGAG	CGTCTCACACCG	GTTTCGAGACG	GTACCTAGCGTGACGATCCG	CTACAGGTACCGGTCCTGAGCGTCTCACACCGCCCGGGGCGTCCCCACCGCGGTTTCGAGACGGTACCTAGCGTGACGATCCG
1627	AKT1_1627	CGTCCCCACCGCGCGGCCGG	AKT1	CTACAGGTACCGGTCCTGAG	CGTCTCACACCG	GTTTCGAGACG	GTACCTAGCGTGACGATCCG	CTACAGGTACCGGTCCTGAGCGTCTCACACCGCGTCCCCACCGCGCGGCCGGGTTTCGAGACGGTACCTAGCGTGACGATCCG
2751	ARAP1_2751	GCAAGATCAGTGGACACTGT	ARAP1	CTACAGGTACCGGTCCTGAG	CGTCTCACACCG	GTTTCGAGACG	GTACCTAGCGTGACGATCCG	CTACAGGTACCGGTCCTGAGCGTCTCACACCGGCAAGATCAGTGGACACTGTGTTTCGAGACGGTACCTAGCGTGACGATCCG
3006	ARID1A_3006	GACTCTGGCTCCCGGCGCCC	ARID1A	CTACAGGTACCGGTCCTGAG	CGTCTCACACCG	GTTTCGAGACG	GTACCTAGCGTGACGATCCG	CTACAGGTACCGGTCCTGAGCGTCTCACACCGGACTCTGGCTCCCGGCGCCCGTTTCGAGACGGTACCTAGCGTGACGATCCG
3564	ATF5_3564	AGGAGTGGGAAGGAAAGGCT	ATF5	CTACAGGTACCGGTCCTGAG	CGTCTCACACCG	GTTTCGAGACG	GTACCTAGCGTGACGATCCG	CTACAGGTACCGGTCCTGAGCGTCTCACACCGAGGAGTGGGAAGGAAAGGCTGTTTCGAGACGGTACCTAGCGTGACGATCCG
4554	BHLHA15_4554	CGGCGGGCGCTGGGCAGCAG	BHLHA15	CTACAGGTACCGGTCCTGAG	CGTCTCACACCG	GTTTCGAGACG	GTACCTAGCGTGACGATCCG	CTACAGGTACCGGTCCTGAGCGTCTCACACCGCGGCGGGCGCTGGGCAGCAGGTTTCGAGACGGTACCTAGCGTGACGATCCG
4705	BMP2_4705	GCTCGCCGGGGATCCCCGAG	BMP2	CTACAGGTACCGGTCCTGAG	CGTCTCACACCG	GTTTCGAGACG	GTACCTAGCGTGACGATCCG	CTACAGGTACCGGTCCTGAGCGTCTCACACCGGCTCGCCGGGGATCCCCGAGGTTTCGAGACGGTACCTAGCGTGACGATCCG
9054	CFLAR_9054	CAGTGTTTACTCCTAACGCG	CFLAR	CTACAGGTACCGGTCCTGAG	CGTCTCACACCG	GTTTCGAGACG	GTACCTAGCGTGACGATCCG	CTACAGGTACCGGTCCTGAGCGTCTCACACCGCAGTGTTTACTCCTAACGCGGTTTCGAGACGGTACCTAGCGTGACGATCCG
11513	CUL3_11513	CGGAGAGTGAGAGATGCCGG	CUL3	CTACAGGTACCGGTCCTGAG	CGTCTCACACCG	GTTTCGAGACG	GTACCTAGCGTGACGATCCG	CTACAGGTACCGGTCCTGAGCGTCTCACACCGCGGAGAGTGAGAGATGCCGGGTTTCGAGACGGTACCTAGCGTGACGATCCG
14896	EOMES_14896	GCAGGTGGGTAGCCCCGGCG	EOMES	CTACAGGTACCGGTCCTGAG	CGTCTCACACCG	GTTTCGAGACG	GTACCTAGCGTGACGATCCG	CTACAGGTACCGGTCCTGAGCGTCTCACACCGGCAGGTGGGTAGCCCCGGCGGTTTCGAGACGGTACCTAGCGTGACGATCCG
14897	EOMES_14897	TTCCCCTTCCTCCCGCGCCG	EOMES	CTACAGGTACCGGTCCTGAG	CGTCTCACACCG	GTTTCGAGACG	GTACCTAGCGTGACGATCCG	CTACAGGTACCGGTCCTGAGCGTCTCACACCGTTCCCCTTCCTCCCGCGCCGGTTTCGAGACGGTACCTAGCGTGACGATCCG
16466	FASLG_16466	GCTTCAGCTGCAAAGTGAGT	FASLG	CTACAGGTACCGGTCCTGAG	CGTCTCACACCG	GTTTCGAGACG	GTACCTAGCGTGACGATCCG	CTACAGGTACCGGTCCTGAGCGTCTCACACCGGCTTCAGCTGCAAAGTGAGTGTTTCGAGACGGTACCTAGCGTGACGATCCG
16468	FASLG_16468	TTGTGGGCGGAAACTTCCAG	FASLG	CTACAGGTACCGGTCCTGAG	CGTCTCACACCG	GTTTCGAGACG	GTACCTAGCGTGACGATCCG	CTACAGGTACCGGTCCTGAGCGTCTCACACCGTTGTGGGCGGAAACTTCCAGGTTTCGAGACGGTACCTAGCGTGACGATCCG
17395	FOXA2_17395	AGAGGGAGCGCGAGAGAGGG	FOXA2	CTACAGGTACCGGTCCTGAG	CGTCTCACACCG	GTTTCGAGACG	GTACCTAGCGTGACGATCCG	CTACAGGTACCGGTCCTGAGCGTCTCACACCGAGAGGGAGCGCGAGAGAGGGGTTTCGAGACGGTACCTAGCGTGACGATCCG
17400	FOXA3_17400	GTCTCCTGGCGATCCCGCAG	FOXA3	CTACAGGTACCGGTCCTGAG	CGTCTCACACCG	GTTTCGAGACG	GTACCTAGCGTGACGATCCG	CTACAGGTACCGGTCCTGAGCGTCTCACACCGGTCTCCTGGCGATCCCGCAGGTTTCGAGACGGTACCTAGCGTGACGATCCG
17409	FOXC1_17409	GCGCGCGAGAGACCGAGAAA	FOXC1	CTACAGGTACCGGTCCTGAG	CGTCTCACACCG	GTTTCGAGACG	GTACCTAGCGTGACGATCCG	CTACAGGTACCGGTCCTGAGCGTCTCACACCGGCGCGCGAGAGACCGAGAAAGTTTCGAGACGGTACCTAGCGTGACGATCCG
17466	FOXI3_17466	GGCTCCGGGTTTGGGCGCGC	FOXI3	CTACAGGTACCGGTCCTGAG	CGTCTCACACCG	GTTTCGAGACG	GTACCTAGCGTGACGATCCG	CTACAGGTACCGGTCCTGAGCGTCTCACACCGGGCTCCGGGTTTGGGCGCGCGTTTCGAGACGGTACCTAGCGTGACGATCCG
17488	FOXL2NB_17488	ATACGAATCAGAACAGAGCG	FOXL2NB	CTACAGGTACCGGTCCTGAG	CGTCTCACACCG	GTTTCGAGACG	GTACCTAGCGTGACGATCCG	CTACAGGTACCGGTCCTGAGCGTCTCACACCGATACGAATCAGAACAGAGCGGTTTCGAGACGGTACCTAGCGTGACGATCCG
17490	FOXL2NB_17490	GGCGCACTAGGGACTCCAGG	FOXL2NB	CTACAGGTACCGGTCCTGAG	CGTCTCACACCG	GTTTCGAGACG	GTACCTAGCGTGACGATCCG	CTACAGGTACCGGTCCTGAGCGTCTCACACCGGGCGCACTAGGGACTCCAGGGTTTCGAGACGGTACCTAGCGTGACGATCCG
17515	FOXO6_17515	GCGGAATCCTCAGCCAGCCC	FOXO6	CTACAGGTACCGGTCCTGAG	CGTCTCACACCG	GTTTCGAGACG	GTACCTAGCGTGACGATCCG	CTACAGGTACCGGTCCTGAGCGTCTCACACCGGCGGAATCCTCAGCCAGCCCGTTTCGAGACGGTACCTAGCGTGACGATCCG
18273	GBX1_18273	AGGAAGATGGATGAGTCCGG	GBX1	CTACAGGTACCGGTCCTGAG	CGTCTCACACCG	GTTTCGAGACG	GTACCTAGCGTGACGATCCG	CTACAGGTACCGGTCCTGAGCGTCTCACACCGAGGAAGATGGATGAGTCCGGGTTTCGAGACGGTACCTAGCGTGACGATCCG
18274	GBX1_18274	GGAAGATGGATGAGTCCGGA	GBX1	CTACAGGTACCGGTCCTGAG	CGTCTCACACCG	GTTTCGAGACG	GTACCTAGCGTGACGATCCG	CTACAGGTACCGGTCCTGAGCGTCTCACACCGGGAAGATGGATGAGTCCGGAGTTTCGAGACGGTACCTAGCGTGACGATCCG
18596	GIGYF2_18596	TCGTGGGAGACTGGAGAGTG	GIGYF2	CTACAGGTACCGGTCCTGAG	CGTCTCACACCG	GTTTCGAGACG	GTACCTAGCGTGACGATCCG	CTACAGGTACCGGTCCTGAGCGTCTCACACCGTCGTGGGAGACTGGAGAGTGGTTTCGAGACGGTACCTAGCGTGACGATCCG
18597	GIGYF2_18597	TGTCGTGGGAGACTGGAGAG	GIGYF2	CTACAGGTACCGGTCCTGAG	CGTCTCACACCG	GTTTCGAGACG	GTACCTAGCGTGACGATCCG	CTACAGGTACCGGTCCTGAGCGTCTCACACCGTGTCGTGGGAGACTGGAGAGGTTTCGAGACGGTACCTAGCGTGACGATCCG
19599	GPRC5A_19599	CATAACAGCATGAAGTGCCG	GPRC5A	CTACAGGTACCGGTCCTGAG	CGTCTCACACCG	GTTTCGAGACG	GTACCTAGCGTGACGATCCG	CTACAGGTACCGGTCCTGAGCGTCTCACACCGCATAACAGCATGAAGTGCCGGTTTCGAGACGGTACCTAGCGTGACGATCCG
19600	GPRC5A_19600	GAGGGGTGAGCAGAGGGACA	GPRC5A	CTACAGGTACCGGTCCTGAG	CGTCTCACACCG	GTTTCGAGACG	GTACCTAGCGTGACGATCCG	CTACAGGTACCGGTCCTGAGCGTCTCACACCGGAGGGGTGAGCAGAGGGACAGTTTCGAGACGGTACCTAGCGTGACGATCCG
19912	GSK3B_19912	CCAGACGCCTGTTACGCGGG	GSK3B	CTACAGGTACCGGTCCTGAG	CGTCTCACACCG	GTTTCGAGACG	GTACCTAGCGTGACGATCCG	CTACAGGTACCGGTCCTGAGCGTCTCACACCGCCAGACGCCTGTTACGCGGGGTTTCGAGACGGTACCTAGCGTGACGATCCG
20502	HDGF_20502	CAACCTCGCGCTCCCTCCCG	HDGF	CTACAGGTACCGGTCCTGAG	CGTCTCACACCG	GTTTCGAGACG	GTACCTAGCGTGACGATCCG	CTACAGGTACCGGTCCTGAGCGTCTCACACCGCAACCTCGCGCTCCCTCCCGGTTTCGAGACGGTACCTAGCGTGACGATCCG
20504	HDGF_20504	CTGCACGCATCAAACCGCCG	HDGF	CTACAGGTACCGGTCCTGAG	CGTCTCACACCG	GTTTCGAGACG	GTACCTAGCGTGACGATCCG	CTACAGGTACCGGTCCTGAGCGTCTCACACCGCTGCACGCATCAAACCGCCGGTTTCGAGACGGTACCTAGCGTGACGATCCG
21379	HOXC11_21379	GCACTTCGCAGACGTAGGAG	HOXC11	CTACAGGTACCGGTCCTGAG	CGTCTCACACCG	GTTTCGAGACG	GTACCTAGCGTGACGATCCG	CTACAGGTACCGGTCCTGAGCGTCTCACACCGGCACTTCGCAGACGTAGGAGGTTTCGAGACGGTACCTAGCGTGACGATCCG
22114	IFNB1_22114	ATGACATAGGAAAACTGAAA	IFNB1	CTACAGGTACCGGTCCTGAG	CGTCTCACACCG	GTTTCGAGACG	GTACCTAGCGTGACGATCCG	CTACAGGTACCGGTCCTGAGCGTCTCACACCGATGACATAGGAAAACTGAAAGTTTCGAGACGGTACCTAGCGTGACGATCCG
22137	IFNL2_22137	CTACAGGAAGGTATGTTCCC	IFNL2	CTACAGGTACCGGTCCTGAG	CGTCTCACACCG	GTTTCGAGACG	GTACCTAGCGTGACGATCCG	CTACAGGTACCGGTCCTGAGCGTCTCACACCGCTACAGGAAGGTATGTTCCCGTTTCGAGACGGTACCTAGCGTGACGATCCG
22211	IGF1R_22211	GCTCCGCTCCGCACGTCTTG	IGF1R	CTACAGGTACCGGTCCTGAG	CGTCTCACACCG	GTTTCGAGACG	GTACCTAGCGTGACGATCCG	CTACAGGTACCGGTCCTGAGCGTCTCACACCGGCTCCGCTCCGCACGTCTTGGTTTCGAGACGGTACCTAGCGTGACGATCCG
22635	ILKAP_22635	CGCCCCGACTGCGAGCCGGG	ILKAP	CTACAGGTACCGGTCCTGAG	CGTCTCACACCG	GTTTCGAGACG	GTACCTAGCGTGACGATCCG	CTACAGGTACCGGTCCTGAGCGTCTCACACCGCGCCCCGACTGCGAGCCGGGGTTTCGAGACGGTACCTAGCGTGACGATCCG
22659	IMPA2_22659	GAGCTCTGCGAGGGGCGAGG	IMPA2	CTACAGGTACCGGTCCTGAG	CGTCTCACACCG	GTTTCGAGACG	GTACCTAGCGTGACGATCCG	CTACAGGTACCGGTCCTGAGCGTCTCACACCGGAGCTCTGCGAGGGGCGAGGGTTTCGAGACGGTACCTAGCGTGACGATCCG
23043	IRS4_23043	GGGCTGGGGCGGGCAGACGA	IRS4	CTACAGGTACCGGTCCTGAG	CGTCTCACACCG	GTTTCGAGACG	GTACCTAGCGTGACGATCCG	CTACAGGTACCGGTCCTGAGCGTCTCACACCGGGGCTGGGGCGGGCAGACGAGTTTCGAGACGGTACCTAGCGTGACGATCCG
23056	IRX5_23056	GACTGGCAGGAGCTTCTGGG	IRX5	CTACAGGTACCGGTCCTGAG	CGTCTCACACCG	GTTTCGAGACG	GTACCTAGCGTGACGATCCG	CTACAGGTACCGGTCCTGAGCGTCTCACACCGGACTGGCAGGAGCTTCTGGGGTTTCGAGACGGTACCTAGCGTGACGATCCG
23057	IRX5_23057	GAGAGAGCCGAGGAGGAAGA	IRX5	CTACAGGTACCGGTCCTGAG	CGTCTCACACCG	GTTTCGAGACG	GTACCTAGCGTGACGATCCG	CTACAGGTACCGGTCCTGAGCGTCTCACACCGGAGAGAGCCGAGGAGGAAGAGTTTCGAGACGGTACCTAGCGTGACGATCCG
24031	KIAA0232_24031	GAGCGCGCCCCTGGTTGGCG	KIAA0232	CTACAGGTACCGGTCCTGAG	CGTCTCACACCG	GTTTCGAGACG	GTACCTAGCGTGACGATCCG	CTACAGGTACCGGTCCTGAGCGTCTCACACCGGAGCGCGCCCCTGGTTGGCGGTTTCGAGACGGTACCTAGCGTGACGATCCG
24430	KLF7_24430	CAAACTAGCAAGGATGGGGT	KLF7	CTACAGGTACCGGTCCTGAG	CGTCTCACACCG	GTTTCGAGACG	GTACCTAGCGTGACGATCCG	CTACAGGTACCGGTCCTGAGCGTCTCACACCGCAAACTAGCAAGGATGGGGTGTTTCGAGACGGTACCTAGCGTGACGATCCG
24431	KLF7_24431	GGGAAGACTACAAACTAGCA	KLF7	CTACAGGTACCGGTCCTGAG	CGTCTCACACCG	GTTTCGAGACG	GTACCTAGCGTGACGATCCG	CTACAGGTACCGGTCCTGAGCGTCTCACACCGGGGAAGACTACAAACTAGCAGTTTCGAGACGGTACCTAGCGTGACGATCCG
25803	LHX4_25803	GGTGACCGCGGCCTCCCGGG	LHX4	CTACAGGTACCGGTCCTGAG	CGTCTCACACCG	GTTTCGAGACG	GTACCTAGCGTGACGATCCG	CTACAGGTACCGGTCCTGAGCGTCTCACACCGGGTGACCGCGGCCTCCCGGGGTTTCGAGACGGTACCTAGCGTGACGATCCG
25805	LHX4_25805	TCAAAACGCCCGGGTGACCG	LHX4	CTACAGGTACCGGTCCTGAG	CGTCTCACACCG	GTTTCGAGACG	GTACCTAGCGTGACGATCCG	CTACAGGTACCGGTCCTGAGCGTCTCACACCGTCAAAACGCCCGGGTGACCGGTTTCGAGACGGTACCTAGCGTGACGATCCG
26517	LRIG1_26517	TGTTGCAAAGCATCCAACGT	LRIG1	CTACAGGTACCGGTCCTGAG	CGTCTCACACCG	GTTTCGAGACG	GTACCTAGCGTGACGATCCG	CTACAGGTACCGGTCCTGAGCGTCTCACACCGTGTTGCAAAGCATCCAACGTGTTTCGAGACGGTACCTAGCGTGACGATCCG
28368	MEX3B_28368	GCTGCAGAGGCTCAGTCAAG	MEX3B	CTACAGGTACCGGTCCTGAG	CGTCTCACACCG	GTTTCGAGACG	GTACCTAGCGTGACGATCCG	CTACAGGTACCGGTCCTGAGCGTCTCACACCGGCTGCAGAGGCTCAGTCAAGGTTTCGAGACGGTACCTAGCGTGACGATCCG
30045	MYC_30045	CCCCCGAGCTGTGCTGCTCG	MYC	CTACAGGTACCGGTCCTGAG	CGTCTCACACCG	GTTTCGAGACG	GTACCTAGCGTGACGATCCG	CTACAGGTACCGGTCCTGAGCGTCTCACACCGCCCCCGAGCTGTGCTGCTCGGTTTCGAGACGGTACCTAGCGTGACGATCCG
30046	MYC_30046	CTCCTGCCTCGAGAAGGGCA	MYC	CTACAGGTACCGGTCCTGAG	CGTCTCACACCG	GTTTCGAGACG	GTACCTAGCGTGACGATCCG	CTACAGGTACCGGTCCTGAGCGTCTCACACCGCTCCTGCCTCGAGAAGGGCAGTTTCGAGACGGTACCTAGCGTGACGATCCG
30298	MYPOP_30298	GAATGAAACCCTGGCGGTAA	MYPOP	CTACAGGTACCGGTCCTGAG	CGTCTCACACCG	GTTTCGAGACG	GTACCTAGCGTGACGATCCG	CTACAGGTACCGGTCCTGAGCGTCTCACACCGGAATGAAACCCTGGCGGTAAGTTTCGAGACGGTACCTAGCGTGACGATCCG
30299	MYPOP_30299	GGTAGGTGGGAATGAAACCC	MYPOP	CTACAGGTACCGGTCCTGAG	CGTCTCACACCG	GTTTCGAGACG	GTACCTAGCGTGACGATCCG	CTACAGGTACCGGTCCTGAGCGTCTCACACCGGGTAGGTGGGAATGAAACCCGTTTCGAGACGGTACCTAGCGTGACGATCCG
30302	MYRF_30302	GCCTGCAGGAGTCGGGAGCG	MYRF	CTACAGGTACCGGTCCTGAG	CGTCTCACACCG	GTTTCGAGACG	GTACCTAGCGTGACGATCCG	CTACAGGTACCGGTCCTGAGCGTCTCACACCGGCCTGCAGGAGTCGGGAGCGGTTTCGAGACGGTACCTAGCGTGACGATCCG
32479	NR1D1_32479	GTTGGAAAAGTGTGTCACTG	NR1D1	CTACAGGTACCGGTCCTGAG	CGTCTCACACCG	GTTTCGAGACG	GTACCTAGCGTGACGATCCG	CTACAGGTACCGGTCCTGAGCGTCTCACACCGGTTGGAAAAGTGTGTCACTGGTTTCGAGACGGTACCTAGCGTGACGATCCG
32495	NR1I2_32495	TTTCAGTCCAAGTCAGATGT	NR1I2	CTACAGGTACCGGTCCTGAG	CGTCTCACACCG	GTTTCGAGACG	GTACCTAGCGTGACGATCCG	CTACAGGTACCGGTCCTGAGCGTCTCACACCGTTTCAGTCCAAGTCAGATGTGTTTCGAGACGGTACCTAGCGTGACGATCCG
32593	NRIP1_32593	CTCCGCCGCCGAGTCCGCCG	NRIP1	CTACAGGTACCGGTCCTGAG	CGTCTCACACCG	GTTTCGAGACG	GTACCTAGCGTGACGATCCG	CTACAGGTACCGGTCCTGAGCGTCTCACACCGCTCCGCCGCCGAGTCCGCCGGTTTCGAGACGGTACCTAGCGTGACGATCCG
32594	NRIP1_32594	CTGAAGAGCTGAATGGCGTG	NRIP1	CTACAGGTACCGGTCCTGAG	CGTCTCACACCG	GTTTCGAGACG	GTACCTAGCGTGACGATCCG	CTACAGGTACCGGTCCTGAGCGTCTCACACCGCTGAAGAGCTGAATGGCGTGGTTTCGAGACGGTACCTAGCGTGACGATCCG
36613	PITX1_36613	GCGAGCGAGCGAGGGAGCGC	PITX1	CTACAGGTACCGGTCCTGAG	CGTCTCACACCG	GTTTCGAGACG	GTACCTAGCGTGACGATCCG	CTACAGGTACCGGTCCTGAGCGTCTCACACCGGCGAGCGAGCGAGGGAGCGCGTTTCGAGACGGTACCTAGCGTGACGATCCG
38153	PRDM1_38153	TGAAATACACATGCGAAGAG	PRDM1	CTACAGGTACCGGTCCTGAG	CGTCTCACACCG	GTTTCGAGACG	GTACCTAGCGTGACGATCCG	CTACAGGTACCGGTCCTGAGCGTCTCACACCGTGAAATACACATGCGAAGAGGTTTCGAGACGGTACCTAGCGTGACGATCCG
38173	PRDM16_38173	CCCCCAATCCCGCGCCGAGG	PRDM16	CTACAGGTACCGGTCCTGAG	CGTCTCACACCG	GTTTCGAGACG	GTACCTAGCGTGACGATCCG	CTACAGGTACCGGTCCTGAGCGTCTCACACCGCCCCCAATCCCGCGCCGAGGGTTTCGAGACGGTACCTAGCGTGACGATCCG
38174	PRDM16_38174	GCGGCGGCGGCGCGACGATG	PRDM16	CTACAGGTACCGGTCCTGAG	CGTCTCACACCG	GTTTCGAGACG	GTACCTAGCGTGACGATCCG	CTACAGGTACCGGTCCTGAGCGTCTCACACCGGCGGCGGCGGCGCGACGATGGTTTCGAGACGGTACCTAGCGTGACGATCCG
39281	PTPRJ_39281	GAGGGGATCCGCGGCCGGCT	PTPRJ	CTACAGGTACCGGTCCTGAG	CGTCTCACACCG	GTTTCGAGACG	GTACCTAGCGTGACGATCCG	CTACAGGTACCGGTCCTGAGCGTCTCACACCGGAGGGGATCCGCGGCCGGCTGTTTCGAGACGGTACCTAGCGTGACGATCCG
39283	PTPRJ_39283	TCGCTTCCTCCCGCCCCGGC	PTPRJ	CTACAGGTACCGGTCCTGAG	CGTCTCACACCG	GTTTCGAGACG	GTACCTAGCGTGACGATCCG	CTACAGGTACCGGTCCTGAGCGTCTCACACCGTCGCTTCCTCCCGCCCCGGCGTTTCGAGACGGTACCTAGCGTGACGATCCG
40332	RBMS1_40332	CCGAGCCCGGGACCCGCTGG	RBMS1	CTACAGGTACCGGTCCTGAG	CGTCTCACACCG	GTTTCGAGACG	GTACCTAGCGTGACGATCCG	CTACAGGTACCGGTCCTGAGCGTCTCACACCGCCGAGCCCGGGACCCGCTGGGTTTCGAGACGGTACCTAGCGTGACGATCCG
41375	RNF19B_41375	ACTCCTAGACCGGGGCGCAA	RNF19B	CTACAGGTACCGGTCCTGAG	CGTCTCACACCG	GTTTCGAGACG	GTACCTAGCGTGACGATCCG	CTACAGGTACCGGTCCTGAGCGTCTCACACCGACTCCTAGACCGGGGCGCAAGTTTCGAGACGGTACCTAGCGTGACGATCCG
41828	RPRD2_41828	GGACGGGAACACCAGCTGCT	RPRD2	CTACAGGTACCGGTCCTGAG	CGTCTCACACCG	GTTTCGAGACG	GTACCTAGCGTGACGATCCG	CTACAGGTACCGGTCCTGAGCGTCTCACACCGGGACGGGAACACCAGCTGCTGTTTCGAGACGGTACCTAGCGTGACGATCCG
42639	SCAF11_42639	TCGGCGCGCTAAGGTGACGA	SCAF11	CTACAGGTACCGGTCCTGAG	CGTCTCACACCG	GTTTCGAGACG	GTACCTAGCGTGACGATCCG	CTACAGGTACCGGTCCTGAGCGTCTCACACCGTCGGCGCGCTAAGGTGACGAGTTTCGAGACGGTACCTAGCGTGACGATCCG
43353	SERPINB9_43353	TGGTGGCCGAGGTCAGAGCT	SERPINB9	CTACAGGTACCGGTCCTGAG	CGTCTCACACCG	GTTTCGAGACG	GTACCTAGCGTGACGATCCG	CTACAGGTACCGGTCCTGAGCGTCTCACACCGTGGTGGCCGAGGTCAGAGCTGTTTCGAGACGGTACCTAGCGTGACGATCCG
44562	SLC26A3_44562	ACTGGTGGTTTAATCTCACA	SLC26A3	CTACAGGTACCGGTCCTGAG	CGTCTCACACCG	GTTTCGAGACG	GTACCTAGCGTGACGATCCG	CTACAGGTACCGGTCCTGAGCGTCTCACACCGACTGGTGGTTTAATCTCACAGTTTCGAGACGGTACCTAGCGTGACGATCCG
44880	SLC39A2_44880	CCCTGCCAGGCACAGCCCAG	SLC39A2	CTACAGGTACCGGTCCTGAG	CGTCTCACACCG	GTTTCGAGACG	GTACCTAGCGTGACGATCCG	CTACAGGTACCGGTCCTGAGCGTCTCACACCGCCCTGCCAGGCACAGCCCAGGTTTCGAGACGGTACCTAGCGTGACGATCCG
45071	SLC6A14_45071	GCTACATGTAGGCTTATCTG	SLC6A14	CTACAGGTACCGGTCCTGAG	CGTCTCACACCG	GTTTCGAGACG	GTACCTAGCGTGACGATCCG	CTACAGGTACCGGTCCTGAGCGTCTCACACCGGCTACATGTAGGCTTATCTGGTTTCGAGACGGTACCTAGCGTGACGATCCG
45072	SLC6A14_45072	GGCAGGAGATTGCTACATGT	SLC6A14	CTACAGGTACCGGTCCTGAG	CGTCTCACACCG	GTTTCGAGACG	GTACCTAGCGTGACGATCCG	CTACAGGTACCGGTCCTGAGCGTCTCACACCGGGCAGGAGATTGCTACATGTGTTTCGAGACGGTACCTAGCGTGACGATCCG
46573	SPRY2_46573	CTGCCTCCTCCGGAAAGGCG	SPRY2	CTACAGGTACCGGTCCTGAG	CGTCTCACACCG	GTTTCGAGACG	GTACCTAGCGTGACGATCCG	CTACAGGTACCGGTCCTGAGCGTCTCACACCGCTGCCTCCTCCGGAAAGGCGGTTTCGAGACGGTACCTAGCGTGACGATCCG
50474	TNFRSF10A_50474	GAAGCTGAGAGCGGCAAGGG	TNFRSF10A	CTACAGGTACCGGTCCTGAG	CGTCTCACACCG	GTTTCGAGACG	GTACCTAGCGTGACGATCCG	CTACAGGTACCGGTCCTGAGCGTCTCACACCGGAAGCTGAGAGCGGCAAGGGGTTTCGAGACGGTACCTAGCGTGACGATCCG
51129	TRIB1_51129	TCCCAACTGTTTACACAGCC	TRIB1	CTACAGGTACCGGTCCTGAG	CGTCTCACACCG	GTTTCGAGACG	GTACCTAGCGTGACGATCCG	CTACAGGTACCGGTCCTGAGCGTCTCACACCGTCCCAACTGTTTACACAGCCGTTTCGAGACGGTACCTAGCGTGACGATCCG
51903	TTI1_51903	GACCGCTCGAGCCTGCACAC	TTI1	CTACAGGTACCGGTCCTGAG	CGTCTCACACCG	GTTTCGAGACG	GTACCTAGCGTGACGATCCG	CTACAGGTACCGGTCCTGAGCGTCTCACACCGGACCGCTCGAGCCTGCACACGTTTCGAGACGGTACCTAGCGTGACGATCCG
54483	ZBTB10_54483	GGCGCCAGGGGACCGGGAAA	ZBTB10	CTACAGGTACCGGTCCTGAG	CGTCTCACACCG	GTTTCGAGACG	GTACCTAGCGTGACGATCCG	CTACAGGTACCGGTCCTGAGCGTCTCACACCGGGCGCCAGGGGACCGGGAAAGTTTCGAGACGGTACCTAGCGTGACGATCCG
54588	ZBTB7B_54588	GTGAGACAGCAGGACAGGTG	ZBTB7B	CTACAGGTACCGGTCCTGAG	CGTCTCACACCG	GTTTCGAGACG	GTACCTAGCGTGACGATCCG	CTACAGGTACCGGTCCTGAGCGTCTCACACCGGTGAGACAGCAGGACAGGTGGTTTCGAGACGGTACCTAGCGTGACGATCCG
58039	PRDM1_PRDM1_1277	ATGCGAAGAGAGGAAGCTCT	PRDM1	CTACAGGTACCGGTCCTGAG	CGTCTCACACCG	GTTTCGAGACG	GTACCTAGCGTGACGATCCG	CTACAGGTACCGGTCCTGAGCGTCTCACACCGATGCGAAGAGAGGAAGCTCTGTTTCGAGACGGTACCTAGCGTGACGATCCG
58071	BMP2_BMP2_1309	GGCGAGCCGCGCCGCGAAGG	BMP2	CTACAGGTACCGGTCCTGAG	CGTCTCACACCG	GTTTCGAGACG	GTACCTAGCGTGACGATCCG	CTACAGGTACCGGTCCTGAGCGTCTCACACCGGGCGAGCCGCGCCGCGAAGGGTTTCGAGACGGTACCTAGCGTGACGATCCG
58094	BMPR1B_BMPR1B_1332	ATCACTAGTGGGAGCTGGAG	BMPR1B	CTACAGGTACCGGTCCTGAG	CGTCTCACACCG	GTTTCGAGACG	GTACCTAGCGTGACGATCCG	CTACAGGTACCGGTCCTGAGCGTCTCACACCGATCACTAGTGGGAGCTGGAGGTTTCGAGACGGTACCTAGCGTGACGATCCG
58095	BMPR1B_BMPR1B_1333	TCACTAGTGGGAGCTGGAGA	BMPR1B	CTACAGGTACCGGTCCTGAG	CGTCTCACACCG	GTTTCGAGACG	GTACCTAGCGTGACGATCCG	CTACAGGTACCGGTCCTGAGCGTCTCACACCGTCACTAGTGGGAGCTGGAGAGTTTCGAGACGGTACCTAGCGTGACGATCCG
58096	BMPR2_BMPR2_1334	ACCACAGGCTAGAGACAGAC	BMPR2	CTACAGGTACCGGTCCTGAG	CGTCTCACACCG	GTTTCGAGACG	GTACCTAGCGTGACGATCCG	CTACAGGTACCGGTCCTGAGCGTCTCACACCGACCACAGGCTAGAGACAGACGTTTCGAGACGGTACCTAGCGTGACGATCCG
58097	BMPR2_BMPR2_1335	AGGCTAGAGACAGACAGGGC	BMPR2	CTACAGGTACCGGTCCTGAG	CGTCTCACACCG	GTTTCGAGACG	GTACCTAGCGTGACGATCCG	CTACAGGTACCGGTCCTGAGCGTCTCACACCGAGGCTAGAGACAGACAGGGCGTTTCGAGACGGTACCTAGCGTGACGATCCG
58280	MYRF_MYRF_1518	ACCACGCTCCCGACTCCTGC	MYRF	CTACAGGTACCGGTCCTGAG	CGTCTCACACCG	GTTTCGAGACG	GTACCTAGCGTGACGATCCG	CTACAGGTACCGGTCCTGAGCGTCTCACACCGACCACGCTCCCGACTCCTGCGTTTCGAGACGGTACCTAGCGTGACGATCCG
60482	SLC26A3_SLC26A3_3720	TTAATCTCACAAGGAACTTG	SLC26A3	CTACAGGTACCGGTCCTGAG	CGTCTCACACCG	GTTTCGAGACG	GTACCTAGCGTGACGATCCG	CTACAGGTACCGGTCCTGAGCGTCTCACACCGTTAATCTCACAAGGAACTTGGTTTCGAGACGGTACCTAGCGTGACGATCCG
61488	FOXC1_FOXC1_4726	CAGCCGCTTAAGGAAGCATT	FOXC1	CTACAGGTACCGGTCCTGAG	CGTCTCACACCG	GTTTCGAGACG	GTACCTAGCGTGACGATCCG	CTACAGGTACCGGTCCTGAGCGTCTCACACCGCAGCCGCTTAAGGAAGCATTGTTTCGAGACGGTACCTAGCGTGACGATCCG
62575	GSK3B_GSK3B_5813	GCGCTGGGCGGTGTAAGGCT	GSK3B	CTACAGGTACCGGTCCTGAG	CGTCTCACACCG	GTTTCGAGACG	GTACCTAGCGTGACGATCCG	CTACAGGTACCGGTCCTGAGCGTCTCACACCGGCGCTGGGCGGTGTAAGGCTGTTTCGAGACGGTACCTAGCGTGACGATCCG
63076	FOXA2_FOXA2_6314	CGGAGGCGGTAGTTGGAAGT	FOXA2	CTACAGGTACCGGTCCTGAG	CGTCTCACACCG	GTTTCGAGACG	GTACCTAGCGTGACGATCCG	CTACAGGTACCGGTCCTGAGCGTCTCACACCGCGGAGGCGGTAGTTGGAAGTGTTTCGAGACGGTACCTAGCGTGACGATCCG
63079	FOXA3_FOXA3_6317	ATCGCCAGGAGACAGACCTC	FOXA3	CTACAGGTACCGGTCCTGAG	CGTCTCACACCG	GTTTCGAGACG	GTACCTAGCGTGACGATCCG	CTACAGGTACCGGTCCTGAGCGTCTCACACCGATCGCCAGGAGACAGACCTCGTTTCGAGACGGTACCTAGCGTGACGATCCG
63213	HOXC11_HOXC11_6451	AGCACTTCGCAGACGTAGGA	HOXC11	CTACAGGTACCGGTCCTGAG	CGTCTCACACCG	GTTTCGAGACG	GTACCTAGCGTGACGATCCG	CTACAGGTACCGGTCCTGAGCGTCTCACACCGAGCACTTCGCAGACGTAGGAGTTTCGAGACGGTACCTAGCGTGACGATCCG
63597	IFNB1_IFNB1_6835	AAATTCCTCTGAATAGAGAG	IFNB1	CTACAGGTACCGGTCCTGAG	CGTCTCACACCG	GTTTCGAGACG	GTACCTAGCGTGACGATCCG	CTACAGGTACCGGTCCTGAGCGTCTCACACCGAAATTCCTCTGAATAGAGAGGTTTCGAGACGGTACCTAGCGTGACGATCCG
63622	IGF1R_IGF1R_6860	TCCGCACGTCTTGGGGAACC	IGF1R	CTACAGGTACCGGTCCTGAG	CGTCTCACACCG	GTTTCGAGACG	GTACCTAGCGTGACGATCCG	CTACAGGTACCGGTCCTGAGCGTCTCACACCGTCCGCACGTCTTGGGGAACCGTTTCGAGACGGTACCTAGCGTGACGATCCG
63829	IMPA2_IMPA2_7067	GCTCTGCGAGGGGCGAGGTG	IMPA2	CTACAGGTACCGGTCCTGAG	CGTCTCACACCG	GTTTCGAGACG	GTACCTAGCGTGACGATCCG	CTACAGGTACCGGTCCTGAGCGTCTCACACCGGCTCTGCGAGGGGCGAGGTGGTTTCGAGACGGTACCTAGCGTGACGATCCG
64850	SMAD1_SMAD1_8088	CGGGTGAGCGTGTGAGCGGG	SMAD1	CTACAGGTACCGGTCCTGAG	CGTCTCACACCG	GTTTCGAGACG	GTACCTAGCGTGACGATCCG	CTACAGGTACCGGTCCTGAGCGTCTCACACCGCGGGTGAGCGTGTGAGCGGGGTTTCGAGACGGTACCTAGCGTGACGATCCG
64851	SMAD1_SMAD1_8089	GGGTGAGCGTGTGAGCGGGC	SMAD1	CTACAGGTACCGGTCCTGAG	CGTCTCACACCG	GTTTCGAGACG	GTACCTAGCGTGACGATCCG	CTACAGGTACCGGTCCTGAGCGTCTCACACCGGGGTGAGCGTGTGAGCGGGCGTTTCGAGACGGTACCTAGCGTGACGATCCG
66605	PAX5_PAX5_9843	GCCAGCGCACCTACGGGAAG	PAX5	CTACAGGTACCGGTCCTGAG	CGTCTCACACCG	GTTTCGAGACG	GTACCTAGCGTGACGATCCG	CTACAGGTACCGGTCCTGAGCGTCTCACACCGGCCAGCGCACCTACGGGAAGGTTTCGAGACGGTACCTAGCGTGACGATCCG
66606	PAX5_PAX5_9844	GCGCTAGCCAGCGCACCTAC	PAX5	CTACAGGTACCGGTCCTGAG	CGTCTCACACCG	GTTTCGAGACG	GTACCTAGCGTGACGATCCG	CTACAGGTACCGGTCCTGAGCGTCTCACACCGGCGCTAGCCAGCGCACCTACGTTTCGAGACGGTACCTAGCGTGACGATCCG
67025	SERPINB9_SERPINB9_10263	CCTGCTCCCAGCTCTGACCT	SERPINB9	CTACAGGTACCGGTCCTGAG	CGTCTCACACCG	GTTTCGAGACG	GTACCTAGCGTGACGATCCG	CTACAGGTACCGGTCCTGAGCGTCTCACACCGCCTGCTCCCAGCTCTGACCTGTTTCGAGACGGTACCTAGCGTGACGATCCG
67109	PITX1_PITX1_10347	GCGGCGGCGCGGGCGGCTTG	PITX1	CTACAGGTACCGGTCCTGAG	CGTCTCACACCG	GTTTCGAGACG	GTACCTAGCGTGACGATCCG	CTACAGGTACCGGTCCTGAGCGTCTCACACCGGCGGCGGCGCGGGCGGCTTGGTTTCGAGACGGTACCTAGCGTGACGATCCG
68505	RBMS1_RBMS1_11743	ACTCAGCCCTCACCTCCAGC	RBMS1	CTACAGGTACCGGTCCTGAG	CGTCTCACACCG	GTTTCGAGACG	GTACCTAGCGTGACGATCCG	CTACAGGTACCGGTCCTGAGCGTCTCACACCGACTCAGCCCTCACCTCCAGCGTTTCGAGACGGTACCTAGCGTGACGATCCG
72622	ARID1A_ARID1A_15860	CGCGCTCTGACTCTGGCTCC	ARID1A	CTACAGGTACCGGTCCTGAG	CGTCTCACACCG	GTTTCGAGACG	GTACCTAGCGTGACGATCCG	CTACAGGTACCGGTCCTGAGCGTCTCACACCGCGCGCTCTGACTCTGGCTCCGTTTCGAGACGGTACCTAGCGTGACGATCCG
72934	CUL3_CUL3_16172	CCCCGGCATCTCTCACTCTC	CUL3	CTACAGGTACCGGTCCTGAG	CGTCTCACACCG	GTTTCGAGACG	GTACCTAGCGTGACGATCCG	CTACAGGTACCGGTCCTGAGCGTCTCACACCGCCCCGGCATCTCTCACTCTCGTTTCGAGACGGTACCTAGCGTGACGATCCG
72977	IRS4_IRS4_16215	TCGTGCGCTCAGAGTGGAGT	IRS4	CTACAGGTACCGGTCCTGAG	CGTCTCACACCG	GTTTCGAGACG	GTACCTAGCGTGACGATCCG	CTACAGGTACCGGTCCTGAGCGTCTCACACCGTCGTGCGCTCAGAGTGGAGTGTTTCGAGACGGTACCTAGCGTGACGATCCG
73579	TNFSF10_TNFSF10_16817	GTCCCTGGGCAGTAGGAAAG	TNFSF10	CTACAGGTACCGGTCCTGAG	CGTCTCACACCG	GTTTCGAGACG	GTACCTAGCGTGACGATCCG	CTACAGGTACCGGTCCTGAGCGTCTCACACCGGTCCCTGGGCAGTAGGAAAGGTTTCGAGACGGTACCTAGCGTGACGATCCG
73580	TNFSF10_TNFSF10_16818	TTGAGACAAGAGCTGTCCCT	TNFSF10	CTACAGGTACCGGTCCTGAG	CGTCTCACACCG	GTTTCGAGACG	GTACCTAGCGTGACGATCCG	CTACAGGTACCGGTCCTGAGCGTCTCACACCGTTGAGACAAGAGCTGTCCCTGTTTCGAGACGGTACCTAGCGTGACGATCCG
73684	TNFRSF10A_TNFRSF10A_16922	AGCGGCAAGGGCGGTCACAG	TNFRSF10A	CTACAGGTACCGGTCCTGAG	CGTCTCACACCG	GTTTCGAGACG	GTACCTAGCGTGACGATCCG	CTACAGGTACCGGTCCTGAGCGTCTCACACCGAGCGGCAAGGGCGGTCACAGGTTTCGAGACGGTACCTAGCGTGACGATCCG
73790	CFLAR_CFLAR_17028	CTTGTGTCGACATCCACCCC	CFLAR	CTACAGGTACCGGTCCTGAG	CGTCTCACACCG	GTTTCGAGACG	GTACCTAGCGTGACGATCCG	CTACAGGTACCGGTCCTGAGCGTCTCACACCGCTTGTGTCGACATCCACCCCGTTTCGAGACGGTACCTAGCGTGACGATCCG
73837	NR1I2_NR1I2_17075	TTGGGACTTAGGAGGGGCAA	NR1I2	CTACAGGTACCGGTCCTGAG	CGTCTCACACCG	GTTTCGAGACG	GTACCTAGCGTGACGATCCG	CTACAGGTACCGGTCCTGAGCGTCTCACACCGTTGGGACTTAGGAGGGGCAAGTTTCGAGACGGTACCTAGCGTGACGATCCG
74463	SCAF11_SCAF11_17701	ACCTTAGCGCGCCGACAGCG	SCAF11	CTACAGGTACCGGTCCTGAG	CGTCTCACACCG	GTTTCGAGACG	GTACCTAGCGTGACGATCCG	CTACAGGTACCGGTCCTGAGCGTCTCACACCGACCTTAGCGCGCCGACAGCGGTTTCGAGACGGTACCTAGCGTGACGATCCG
75334	NR1D1_NR1D1_18572	GCAGGTACCATGTGATCCCA	NR1D1	CTACAGGTACCGGTCCTGAG	CGTCTCACACCG	GTTTCGAGACG	GTACCTAGCGTGACGATCCG	CTACAGGTACCGGTCCTGAGCGTCTCACACCGGCAGGTACCATGTGATCCCAGTTTCGAGACGGTACCTAGCGTGACGATCCG
75574	TTI1_TTI1_18812	AGCGGTCAAAGCTCTTTCCG	TTI1	CTACAGGTACCGGTCCTGAG	CGTCTCACACCG	GTTTCGAGACG	GTACCTAGCGTGACGATCCG	CTACAGGTACCGGTCCTGAGCGTCTCACACCGAGCGGTCAAAGCTCTTTCCGGTTTCGAGACGGTACCTAGCGTGACGATCCG
75837	KIAA0232_KIAA0232_19075	ATATGGAGCGCGCCCCTGGT	KIAA0232	CTACAGGTACCGGTCCTGAG	CGTCTCACACCG	GTTTCGAGACG	GTACCTAGCGTGACGATCCG	CTACAGGTACCGGTCCTGAGCGTCTCACACCGATATGGAGCGCGCCCCTGGTGTTTCGAGACGGTACCTAGCGTGACGATCCG
76907	TRIB1_TRIB1_20145	GGCCGGGCTGTGTAAACAGT	TRIB1	CTACAGGTACCGGTCCTGAG	CGTCTCACACCG	GTTTCGAGACG	GTACCTAGCGTGACGATCCG	CTACAGGTACCGGTCCTGAGCGTCTCACACCGGGCCGGGCTGTGTAAACAGTGTTTCGAGACGGTACCTAGCGTGACGATCCG
76994	SPRY2_SPRY2_20232	TGCCTCCTCCGGAAAGGCGA	SPRY2	CTACAGGTACCGGTCCTGAG	CGTCTCACACCG	GTTTCGAGACG	GTACCTAGCGTGACGATCCG	CTACAGGTACCGGTCCTGAGCGTCTCACACCGTGCCTCCTCCGGAAAGGCGAGTTTCGAGACGGTACCTAGCGTGACGATCCG
79463	ATF5_ATF5_22701	ACCCTAGGAGTGGGAAGGAA	ATF5	CTACAGGTACCGGTCCTGAG	CGTCTCACACCG	GTTTCGAGACG	GTACCTAGCGTGACGATCCG	CTACAGGTACCGGTCCTGAGCGTCTCACACCGACCCTAGGAGTGGGAAGGAAGTTTCGAGACGGTACCTAGCGTGACGATCCG
80011	CMTR1_CMTR1_23249	GGACCTCCCAGGTTGAGAGG	CMTR1	CTACAGGTACCGGTCCTGAG	CGTCTCACACCG	GTTTCGAGACG	GTACCTAGCGTGACGATCCG	CTACAGGTACCGGTCCTGAGCGTCTCACACCGGGACCTCCCAGGTTGAGAGGGTTTCGAGACGGTACCTAGCGTGACGATCCG
80012	CMTR1_CMTR1_23250	TCCCAGGTTGAGAGGTGGAG	CMTR1	CTACAGGTACCGGTCCTGAG	CGTCTCACACCG	GTTTCGAGACG	GTACCTAGCGTGACGATCCG	CTACAGGTACCGGTCCTGAGCGTCTCACACCGTCCCAGGTTGAGAGGTGGAGGTTTCGAGACGGTACCTAGCGTGACGATCCG
80444	RPRD2_RPRD2_23682	GCTCTTCTGGAGGTACGGAC	RPRD2	CTACAGGTACCGGTCCTGAG	CGTCTCACACCG	GTTTCGAGACG	GTACCTAGCGTGACGATCCG	CTACAGGTACCGGTCCTGAGCGTCTCACACCGGCTCTTCTGGAGGTACGGACGTTTCGAGACGGTACCTAGCGTGACGATCCG
82002	LRIG1_LRIG1_25240	CGCGGAGCGCGGAGCCTAGG	LRIG1	CTACAGGTACCGGTCCTGAG	CGTCTCACACCG	GTTTCGAGACG	GTACCTAGCGTGACGATCCG	CTACAGGTACCGGTCCTGAGCGTCTCACACCGCGCGGAGCGCGGAGCCTAGGGTTTCGAGACGGTACCTAGCGTGACGATCCG
83924	SLC39A2_SLC39A2_27162	GAGGAGGAGAAGACGCCACT	SLC39A2	CTACAGGTACCGGTCCTGAG	CGTCTCACACCG	GTTTCGAGACG	GTACCTAGCGTGACGATCCG	CTACAGGTACCGGTCCTGAGCGTCTCACACCGGAGGAGGAGAAGACGCCACTGTTTCGAGACGGTACCTAGCGTGACGATCCG
84384	ZBTB7B_ZBTB7B_27622	GACAGGTGAGACAGCAGGAC	ZBTB7B	CTACAGGTACCGGTCCTGAG	CGTCTCACACCG	GTTTCGAGACG	GTACCTAGCGTGACGATCCG	CTACAGGTACCGGTCCTGAGCGTCTCACACCGGACAGGTGAGACAGCAGGACGTTTCGAGACGGTACCTAGCGTGACGATCCG
92356	ZBTB10_ZBTB10_35594	GCGCAGCCCAGCCCCTTTCC	ZBTB10	CTACAGGTACCGGTCCTGAG	CGTCTCACACCG	GTTTCGAGACG	GTACCTAGCGTGACGATCCG	CTACAGGTACCGGTCCTGAGCGTCTCACACCGGCGCAGCCCAGCCCCTTTCCGTTTCGAGACGGTACCTAGCGTGACGATCCG
94476	ILKAP_ILKAP_37714	GTCCGCCCGGCTCGCAGTCG	ILKAP	CTACAGGTACCGGTCCTGAG	CGTCTCACACCG	GTTTCGAGACG	GTACCTAGCGTGACGATCCG	CTACAGGTACCGGTCCTGAGCGTCTCACACCGGTCCGCCCGGCTCGCAGTCGGTTTCGAGACGGTACCTAGCGTGACGATCCG
95692	MEX3B_MEX3B_38930	AGAGGCTCAGTCAAGAGGCG	MEX3B	CTACAGGTACCGGTCCTGAG	CGTCTCACACCG	GTTTCGAGACG	GTACCTAGCGTGACGATCCG	CTACAGGTACCGGTCCTGAGCGTCTCACACCGAGAGGCTCAGTCAAGAGGCGGTTTCGAGACGGTACCTAGCGTGACGATCCG
98992	LRRC58_LRRC58_42230	GCATGGGCTGCGCAGAACTG	LRRC58	CTACAGGTACCGGTCCTGAG	CGTCTCACACCG	GTTTCGAGACG	GTACCTAGCGTGACGATCCG	CTACAGGTACCGGTCCTGAGCGTCTCACACCGGCATGGGCTGCGCAGAACTGGTTTCGAGACGGTACCTAGCGTGACGATCCG
98993	LRRC58_LRRC58_42231	TCCGCGCCCCGCGCCTCGTG	LRRC58	CTACAGGTACCGGTCCTGAG	CGTCTCACACCG	GTTTCGAGACG	GTACCTAGCGTGACGATCCG	CTACAGGTACCGGTCCTGAGCGTCTCACACCGTCCGCGCCCCGCGCCTCGTGGTTTCGAGACGGTACCTAGCGTGACGATCCG
99176	ARAP1_ARAP1_42414	CCTGGGCATCCACCCTGTGA	ARAP1	CTACAGGTACCGGTCCTGAG	CGTCTCACACCG	GTTTCGAGACG	GTACCTAGCGTGACGATCCG	CTACAGGTACCGGTCCTGAGCGTCTCACACCGCCTGGGCATCCACCCTGTGAGTTTCGAGACGGTACCTAGCGTGACGATCCG
100281	RNF19B_RNF19B_43519	GCCCAGCGCACTCCTAGACC	RNF19B	CTACAGGTACCGGTCCTGAG	CGTCTCACACCG	GTTTCGAGACG	GTACCTAGCGTGACGATCCG	CTACAGGTACCGGTCCTGAGCGTCTCACACCGGCCCAGCGCACTCCTAGACCGTTTCGAGACGGTACCTAGCGTGACGATCCG
100600	ACVR1C_ACVR1C_43838	CAGGCCCGGGCGGCTGCGAG	ACVR1C	CTACAGGTACCGGTCCTGAG	CGTCTCACACCG	GTTTCGAGACG	GTACCTAGCGTGACGATCCG	CTACAGGTACCGGTCCTGAGCGTCTCACACCGCAGGCCCGGGCGGCTGCGAGGTTTCGAGACGGTACCTAGCGTGACGATCCG
103493	KANK4_KANK4_46731	AGAATTGCGAAACCGAGGGG	KANK4	CTACAGGTACCGGTCCTGAG	CGTCTCACACCG	GTTTCGAGACG	GTACCTAGCGTGACGATCCG	CTACAGGTACCGGTCCTGAGCGTCTCACACCGAGAATTGCGAAACCGAGGGGGTTTCGAGACGGTACCTAGCGTGACGATCCG
103495	KANK4_KANK4_46733	GGACTTTGGTGTGTAGGAAG	KANK4	CTACAGGTACCGGTCCTGAG	CGTCTCACACCG	GTTTCGAGACG	GTACCTAGCGTGACGATCCG	CTACAGGTACCGGTCCTGAGCGTCTCACACCGGGACTTTGGTGTGTAGGAAGGTTTCGAGACGGTACCTAGCGTGACGATCCG
103725	BHLHA15_BHLHA15_46963	CGGGCGCTGGGCAGCAGTGG	BHLHA15	CTACAGGTACCGGTCCTGAG	CGTCTCACACCG	GTTTCGAGACG	GTACCTAGCGTGACGATCCG	CTACAGGTACCGGTCCTGAGCGTCTCACACCGCGGGCGCTGGGCAGCAGTGGGTTTCGAGACGGTACCTAGCGTGACGATCCG
104942	HNRNPUL2_HNRNPUL2_48180	AGCCGCAGTGGAGTCCAAGA	HNRNPUL2	CTACAGGTACCGGTCCTGAG	CGTCTCACACCG	GTTTCGAGACG	GTACCTAGCGTGACGATCCG	CTACAGGTACCGGTCCTGAGCGTCTCACACCGAGCCGCAGTGGAGTCCAAGAGTTTCGAGACGGTACCTAGCGTGACGATCCG
104943	HNRNPUL2_HNRNPUL2_48181	GCCGCAGTGGAGTCCAAGAC	HNRNPUL2	CTACAGGTACCGGTCCTGAG	CGTCTCACACCG	GTTTCGAGACG	GTACCTAGCGTGACGATCCG	CTACAGGTACCGGTCCTGAGCGTCTCACACCGGCCGCAGTGGAGTCCAAGACGTTTCGAGACGGTACCTAGCGTGACGATCCG
105973	IFNL2_IFNL2_49211	CACAGCCTCAGGTAAGACAC	IFNL2	CTACAGGTACCGGTCCTGAG	CGTCTCACACCG	GTTTCGAGACG	GTACCTAGCGTGACGATCCG	CTACAGGTACCGGTCCTGAGCGTCTCACACCGCACAGCCTCAGGTAAGACACGTTTCGAGACGGTACCTAGCGTGACGATCCG
106328	UBALD2_UBALD2_49566	CGAACGTCCTTACGGGAGCC	UBALD2	CTACAGGTACCGGTCCTGAG	CGTCTCACACCG	GTTTCGAGACG	GTACCTAGCGTGACGATCCG	CTACAGGTACCGGTCCTGAGCGTCTCACACCGCGAACGTCCTTACGGGAGCCGTTTCGAGACGGTACCTAGCGTGACGATCCG
106329	UBALD2_UBALD2_49567	GCCAGCGCCCGGCTCCCGTA	UBALD2	CTACAGGTACCGGTCCTGAG	CGTCTCACACCG	GTTTCGAGACG	GTACCTAGCGTGACGATCCG	CTACAGGTACCGGTCCTGAGCGTCTCACACCGGCCAGCGCCCGGCTCCCGTAGTTTCGAGACGGTACCTAGCGTGACGATCCG
107850	FOXI3_FOXI3_51088	GTTTGGGCGCGCGGGCAGGT	FOXI3	CTACAGGTACCGGTCCTGAG	CGTCTCACACCG	GTTTCGAGACG	GTACCTAGCGTGACGATCCG	CTACAGGTACCGGTCCTGAGCGTCTCACACCGGTTTGGGCGCGCGGGCAGGTGTTTCGAGACGGTACCTAGCGTGACGATCCG
108236	SLCO4C1_SLCO4C1_51474	AGAGTGCGCTGGAGGCTGGA	SLCO4C1	CTACAGGTACCGGTCCTGAG	CGTCTCACACCG	GTTTCGAGACG	GTACCTAGCGTGACGATCCG	CTACAGGTACCGGTCCTGAGCGTCTCACACCGAGAGTGCGCTGGAGGCTGGAGTTTCGAGACGGTACCTAGCGTGACGATCCG
108237	SLCO4C1_SLCO4C1_51475	AGCTGCGAGCTGGAGTAGGA	SLCO4C1	CTACAGGTACCGGTCCTGAG	CGTCTCACACCG	GTTTCGAGACG	GTACCTAGCGTGACGATCCG	CTACAGGTACCGGTCCTGAGCGTCTCACACCGAGCTGCGAGCTGGAGTAGGAGTTTCGAGACGGTACCTAGCGTGACGATCCG
111978	FOXO6_FOXO6_55216	CGGGCGCTGAGCTCCCAGCT	FOXO6	CTACAGGTACCGGTCCTGAG	CGTCTCACACCG	GTTTCGAGACG	GTACCTAGCGTGACGATCCG	CTACAGGTACCGGTCCTGAGCGTCTCACACCGCGGGCGCTGAGCTCCCAGCTGTTTCGAGACGGTACCTAGCGTGACGATCCG
1	NO-TARGET_4512	AAACGAGATCGAGAAAGGTA	NO-TARGET	CTACAGGTACCGGTCCTGAG	CGTCTCACACCG	GTTTCGAGACG	GTACCTAGCGTGACGATCCG	CTACAGGTACCGGTCCTGAGCGTCTCACACCGAAACGAGATCGAGAAAGGTAGTTTCGAGACGGTACCTAGCGTGACGATCCG
2	NO-TARGET_10011	AAATTGGCTTTCGTTCGTGC	NO-TARGET	CTACAGGTACCGGTCCTGAG	CGTCTCACACCG	GTTTCGAGACG	GTACCTAGCGTGACGATCCG	CTACAGGTACCGGTCCTGAGCGTCTCACACCGAAATTGGCTTTCGTTCGTGCGTTTCGAGACGGTACCTAGCGTGACGATCCG
3	NO-TARGET_2759	AATCGCAGGTATCCCAGAGC	NO-TARGET	CTACAGGTACCGGTCCTGAG	CGTCTCACACCG	GTTTCGAGACG	GTACCTAGCGTGACGATCCG	CTACAGGTACCGGTCCTGAGCGTCTCACACCGAATCGCAGGTATCCCAGAGCGTTTCGAGACGGTACCTAGCGTGACGATCCG
4	NO-TARGET_3699	ACAGCGCTCTCGTGTACTAT	NO-TARGET	CTACAGGTACCGGTCCTGAG	CGTCTCACACCG	GTTTCGAGACG	GTACCTAGCGTGACGATCCG	CTACAGGTACCGGTCCTGAGCGTCTCACACCGACAGCGCTCTCGTGTACTATGTTTCGAGACGGTACCTAGCGTGACGATCCG
5	NO-TARGET_5257	ACTAGCCTGTTCGCGAGTAG	NO-TARGET	CTACAGGTACCGGTCCTGAG	CGTCTCACACCG	GTTTCGAGACG	GTACCTAGCGTGACGATCCG	CTACAGGTACCGGTCCTGAGCGTCTCACACCGACTAGCCTGTTCGCGAGTAGGTTTCGAGACGGTACCTAGCGTGACGATCCG
6	NO-TARGET_5917	AGAAACTGAACTATCCTACT	NO-TARGET	CTACAGGTACCGGTCCTGAG	CGTCTCACACCG	GTTTCGAGACG	GTACCTAGCGTGACGATCCG	CTACAGGTACCGGTCCTGAGCGTCTCACACCGAGAAACTGAACTATCCTACTGTTTCGAGACGGTACCTAGCGTGACGATCCG
7	NO-TARGET_10485	ATACGCATGATTGCAAGAGG	NO-TARGET	CTACAGGTACCGGTCCTGAG	CGTCTCACACCG	GTTTCGAGACG	GTACCTAGCGTGACGATCCG	CTACAGGTACCGGTCCTGAGCGTCTCACACCGATACGCATGATTGCAAGAGGGTTTCGAGACGGTACCTAGCGTGACGATCCG
8	NO-TARGET_11323	ATGCCTTAGACTTAACCTCG	NO-TARGET	CTACAGGTACCGGTCCTGAG	CGTCTCACACCG	GTTTCGAGACG	GTACCTAGCGTGACGATCCG	CTACAGGTACCGGTCCTGAGCGTCTCACACCGATGCCTTAGACTTAACCTCGGTTTCGAGACGGTACCTAGCGTGACGATCCG
9	NO-TARGET_15171	CATAAGGTTAACTGCGTGGA	NO-TARGET	CTACAGGTACCGGTCCTGAG	CGTCTCACACCG	GTTTCGAGACG	GTACCTAGCGTGACGATCCG	CTACAGGTACCGGTCCTGAGCGTCTCACACCGCATAAGGTTAACTGCGTGGAGTTTCGAGACGGTACCTAGCGTGACGATCCG
10	NO-TARGET_19623	CCTAAACTCAGACGCACTAC	NO-TARGET	CTACAGGTACCGGTCCTGAG	CGTCTCACACCG	GTTTCGAGACG	GTACCTAGCGTGACGATCCG	CTACAGGTACCGGTCCTGAGCGTCTCACACCGCCTAAACTCAGACGCACTACGTTTCGAGACGGTACCTAGCGTGACGATCCG
11	NO-TARGET_20814	CGAACTTAATCCCGTGGCAA	NO-TARGET	CTACAGGTACCGGTCCTGAG	CGTCTCACACCG	GTTTCGAGACG	GTACCTAGCGTGACGATCCG	CTACAGGTACCGGTCCTGAGCGTCTCACACCGCGAACTTAATCCCGTGGCAAGTTTCGAGACGGTACCTAGCGTGACGATCCG
12	NO-TARGET_21496	CGCATAAGTCGATAGACACA	NO-TARGET	CTACAGGTACCGGTCCTGAG	CGTCTCACACCG	GTTTCGAGACG	GTACCTAGCGTGACGATCCG	CTACAGGTACCGGTCCTGAGCGTCTCACACCGCGCATAAGTCGATAGACACAGTTTCGAGACGGTACCTAGCGTGACGATCCG
13	NO-TARGET_25398	CTCCTTACGTCGGGCATTAA	NO-TARGET	CTACAGGTACCGGTCCTGAG	CGTCTCACACCG	GTTTCGAGACG	GTACCTAGCGTGACGATCCG	CTACAGGTACCGGTCCTGAGCGTCTCACACCGCTCCTTACGTCGGGCATTAAGTTTCGAGACGGTACCTAGCGTGACGATCCG
14	NO-TARGET_28229	GAACGTCCAAGCAAGGGAGC	NO-TARGET	CTACAGGTACCGGTCCTGAG	CGTCTCACACCG	GTTTCGAGACG	GTACCTAGCGTGACGATCCG	CTACAGGTACCGGTCCTGAGCGTCTCACACCGGAACGTCCAAGCAAGGGAGCGTTTCGAGACGGTACCTAGCGTGACGATCCG
15	NO-TARGET_29832	GAGAGTGCGCCTTGATAGTA	NO-TARGET	CTACAGGTACCGGTCCTGAG	CGTCTCACACCG	GTTTCGAGACG	GTACCTAGCGTGACGATCCG	CTACAGGTACCGGTCCTGAGCGTCTCACACCGGAGAGTGCGCCTTGATAGTAGTTTCGAGACGGTACCTAGCGTGACGATCCG
16	NO-TARGET_31281	GATCCAGCAATATTTCTTAA	NO-TARGET	CTACAGGTACCGGTCCTGAG	CGTCTCACACCG	GTTTCGAGACG	GTACCTAGCGTGACGATCCG	CTACAGGTACCGGTCCTGAGCGTCTCACACCGGATCCAGCAATATTTCTTAAGTTTCGAGACGGTACCTAGCGTGACGATCCG
17	NO-TARGET_10969	ATCGGTACCTCTTCACATAT	NO-TARGET	CTACAGGTACCGGTCCTGAG	CGTCTCACACCG	GTTTCGAGACG	GTACCTAGCGTGACGATCCG	CTACAGGTACCGGTCCTGAGCGTCTCACACCGATCGGTACCTCTTCACATATGTTTCGAGACGGTACCTAGCGTGACGATCCG
18	NO-TARGET_10214	AGTTCCCAGAAATATATTGC	NO-TARGET	CTACAGGTACCGGTCCTGAG	CGTCTCACACCG	GTTTCGAGACG	GTACCTAGCGTGACGATCCG	CTACAGGTACCGGTCCTGAGCGTCTCACACCGAGTTCCCAGAAATATATTGCGTTTCGAGACGGTACCTAGCGTGACGATCCG
19	NO-TARGET_5253	ACTAGAGTCATGATCAGCGA	NO-TARGET	CTACAGGTACCGGTCCTGAG	CGTCTCACACCG	GTTTCGAGACG	GTACCTAGCGTGACGATCCG	CTACAGGTACCGGTCCTGAGCGTCTCACACCGACTAGAGTCATGATCAGCGAGTTTCGAGACGGTACCTAGCGTGACGATCCG
20	NO-TARGET_4293	ACCCGATAATAGCTACTGGT	NO-TARGET	CTACAGGTACCGGTCCTGAG	CGTCTCACACCG	GTTTCGAGACG	GTACCTAGCGTGACGATCCG	CTACAGGTACCGGTCCTGAGCGTCTCACACCGACCCGATAATAGCTACTGGTGTTTCGAGACGGTACCTAGCGTGACGATCCG

## Sheet: U-343MG_Subset_Library
	V1	V2	V3	fwd_primer	upstream_fragment	downstream_fragment	rev_primer	complete_sequence
53	Mar.08_53	GAAGGGGTGGAAGCACAGAA	2008-03-01	CAGCGCCAATGGGCTTTCGA	CGTCTCACACCG	GTTTCGAGACG	AGCCGCTTAAGAGCCTGTCG	CAGCGCCAATGGGCTTTCGACGTCTCACACCGGAAGGGGTGGAAGCACAGAAGTTTCGAGACGAGCCGCTTAAGAGCCTGTCG
1941	AMOTL2_1941	TGTGGTTCGCTTTGATCCCG	AMOTL2	CAGCGCCAATGGGCTTTCGA	CGTCTCACACCG	GTTTCGAGACG	AGCCGCTTAAGAGCCTGTCG	CAGCGCCAATGGGCTTTCGACGTCTCACACCGTGTGGTTCGCTTTGATCCCGGTTTCGAGACGAGCCGCTTAAGAGCCTGTCG
2369	ANXA2R_2369	CCAGTTTCTCGTTTGCAAGG	ANXA2R	CAGCGCCAATGGGCTTTCGA	CGTCTCACACCG	GTTTCGAGACG	AGCCGCTTAAGAGCCTGTCG	CAGCGCCAATGGGCTTTCGACGTCTCACACCGCCAGTTTCTCGTTTGCAAGGGTTTCGAGACGAGCCGCTTAAGAGCCTGTCG
2900	ARHGAP42_2900	AGCGCTTGCAAATCGCACCC	ARHGAP42	CAGCGCCAATGGGCTTTCGA	CGTCTCACACCG	GTTTCGAGACG	AGCCGCTTAAGAGCCTGTCG	CAGCGCCAATGGGCTTTCGACGTCTCACACCGAGCGCTTGCAAATCGCACCCGTTTCGAGACGAGCCGCTTAAGAGCCTGTCG
2902	ARHGAP42_2902	TGGGTGGGAGCGCGGCGGCG	ARHGAP42	CAGCGCCAATGGGCTTTCGA	CGTCTCACACCG	GTTTCGAGACG	AGCCGCTTAAGAGCCTGTCG	CAGCGCCAATGGGCTTTCGACGTCTCACACCGTGGGTGGGAGCGCGGCGGCGGTTTCGAGACGAGCCGCTTAAGAGCCTGTCG
3015	ARID3A_3015	CACCCCCAGACAAATCACCA	ARID3A	CAGCGCCAATGGGCTTTCGA	CGTCTCACACCG	GTTTCGAGACG	AGCCGCTTAAGAGCCTGTCG	CAGCGCCAATGGGCTTTCGACGTCTCACACCGCACCCCCAGACAAATCACCAGTTTCGAGACGAGCCGCTTAAGAGCCTGTCG
4189	BAG2_4189	CGATAGGAACCTTCGCGTGG	BAG2	CAGCGCCAATGGGCTTTCGA	CGTCTCACACCG	GTTTCGAGACG	AGCCGCTTAAGAGCCTGTCG	CAGCGCCAATGGGCTTTCGACGTCTCACACCGCGATAGGAACCTTCGCGTGGGTTTCGAGACGAGCCGCTTAAGAGCCTGTCG
4208	BAHCC1_4208	CGGGGAGACACCGAGCGCCC	BAHCC1	CAGCGCCAATGGGCTTTCGA	CGTCTCACACCG	GTTTCGAGACG	AGCCGCTTAAGAGCCTGTCG	CAGCGCCAATGGGCTTTCGACGTCTCACACCGCGGGGAGACACCGAGCGCCCGTTTCGAGACGAGCCGCTTAAGAGCCTGTCG
4989	BSX_4989	GCCAATGACGAGGCTGCCAG	BSX	CAGCGCCAATGGGCTTTCGA	CGTCTCACACCG	GTTTCGAGACG	AGCCGCTTAAGAGCCTGTCG	CAGCGCCAATGGGCTTTCGACGTCTCACACCGGCCAATGACGAGGCTGCCAGGTTTCGAGACGAGCCGCTTAAGAGCCTGTCG
6173	C4orf36_6173	GACGTCCCTTGCCGCTTGGG	C4orf36	CAGCGCCAATGGGCTTTCGA	CGTCTCACACCG	GTTTCGAGACG	AGCCGCTTAAGAGCCTGTCG	CAGCGCCAATGGGCTTTCGACGTCTCACACCGGACGTCCCTTGCCGCTTGGGGTTTCGAGACGAGCCGCTTAAGAGCCTGTCG
6915	CAPN6_6915	AGCCTCCTGAAGTTGCTGCG	CAPN6	CAGCGCCAATGGGCTTTCGA	CGTCTCACACCG	GTTTCGAGACG	AGCCGCTTAAGAGCCTGTCG	CAGCGCCAATGGGCTTTCGACGTCTCACACCGAGCCTCCTGAAGTTGCTGCGGTTTCGAGACGAGCCGCTTAAGAGCCTGTCG
6917	CAPN6_6917	TGCCTCGCAGCAACTTCAGG	CAPN6	CAGCGCCAATGGGCTTTCGA	CGTCTCACACCG	GTTTCGAGACG	AGCCGCTTAAGAGCCTGTCG	CAGCGCCAATGGGCTTTCGACGTCTCACACCGTGCCTCGCAGCAACTTCAGGGTTTCGAGACGAGCCGCTTAAGAGCCTGTCG
7039	CASP1_7039	GCATCAGGTAGTGTATCCAT	CASP1	CAGCGCCAATGGGCTTTCGA	CGTCTCACACCG	GTTTCGAGACG	AGCCGCTTAAGAGCCTGTCG	CAGCGCCAATGGGCTTTCGACGTCTCACACCGGCATCAGGTAGTGTATCCATGTTTCGAGACGAGCCGCTTAAGAGCCTGTCG
7068	CASP8_7068	AAGGCACTCTGCTCACTCAG	CASP8	CAGCGCCAATGGGCTTTCGA	CGTCTCACACCG	GTTTCGAGACG	AGCCGCTTAAGAGCCTGTCG	CAGCGCCAATGGGCTTTCGACGTCTCACACCGAAGGCACTCTGCTCACTCAGGTTTCGAGACGAGCCGCTTAAGAGCCTGTCG
7098	CASZ1_7098	CTCTGCTCTTTCACCTGCCG	CASZ1	CAGCGCCAATGGGCTTTCGA	CGTCTCACACCG	GTTTCGAGACG	AGCCGCTTAAGAGCCTGTCG	CAGCGCCAATGGGCTTTCGACGTCTCACACCGCTCTGCTCTTTCACCTGCCGGTTTCGAGACGAGCCGCTTAAGAGCCTGTCG
7099	CASZ1_7099	GCAGGTGAAAGAGCAGAGCG	CASZ1	CAGCGCCAATGGGCTTTCGA	CGTCTCACACCG	GTTTCGAGACG	AGCCGCTTAAGAGCCTGTCG	CAGCGCCAATGGGCTTTCGACGTCTCACACCGGCAGGTGAAAGAGCAGAGCGGTTTCGAGACGAGCCGCTTAAGAGCCTGTCG
7155	CBFA2T2_7155	CTTAATGGGAGCTGGTCTTG	CBFA2T2	CAGCGCCAATGGGCTTTCGA	CGTCTCACACCG	GTTTCGAGACG	AGCCGCTTAAGAGCCTGTCG	CAGCGCCAATGGGCTTTCGACGTCTCACACCGCTTAATGGGAGCTGGTCTTGGTTTCGAGACGAGCCGCTTAAGAGCCTGTCG
7783	CCND1_7783	AGCCCGGCAGAGAATGGGAG	CCND1	CAGCGCCAATGGGCTTTCGA	CGTCTCACACCG	GTTTCGAGACG	AGCCGCTTAAGAGCCTGTCG	CAGCGCCAATGGGCTTTCGACGTCTCACACCGAGCCCGGCAGAGAATGGGAGGTTTCGAGACGAGCCGCTTAAGAGCCTGTCG
7799	CCNE2_7799	GCGGGCGCGCACTGAGAGCA	CCNE2	CAGCGCCAATGGGCTTTCGA	CGTCTCACACCG	GTTTCGAGACG	AGCCGCTTAAGAGCCTGTCG	CAGCGCCAATGGGCTTTCGACGTCTCACACCGGCGGGCGCGCACTGAGAGCAGTTTCGAGACGAGCCGCTTAAGAGCCTGTCG
7800	CCNE2_7800	GGAGAGGGGAGCGCGCTGTC	CCNE2	CAGCGCCAATGGGCTTTCGA	CGTCTCACACCG	GTTTCGAGACG	AGCCGCTTAAGAGCCTGTCG	CAGCGCCAATGGGCTTTCGACGTCTCACACCGGGAGAGGGGAGCGCGCTGTCGTTTCGAGACGAGCCGCTTAAGAGCCTGTCG
8655	CEBPB_8655	CCCTGCCGCCGTCCTCCCGG	CEBPB	CAGCGCCAATGGGCTTTCGA	CGTCTCACACCG	GTTTCGAGACG	AGCCGCTTAAGAGCCTGTCG	CAGCGCCAATGGGCTTTCGACGTCTCACACCGCCCTGCCGCCGTCCTCCCGGGTTTCGAGACGAGCCGCTTAAGAGCCTGTCG
8819	CEP170_8819	CACACACAGACAATGAAAAG	CEP170	CAGCGCCAATGGGCTTTCGA	CGTCTCACACCG	GTTTCGAGACG	AGCCGCTTAAGAGCCTGTCG	CAGCGCCAATGGGCTTTCGACGTCTCACACCGCACACACAGACAATGAAAAGGTTTCGAGACGAGCCGCTTAAGAGCCTGTCG
8820	CEP170_8820	GGCAAGCTGGAAAAGCGTGT	CEP170	CAGCGCCAATGGGCTTTCGA	CGTCTCACACCG	GTTTCGAGACG	AGCCGCTTAAGAGCCTGTCG	CAGCGCCAATGGGCTTTCGACGTCTCACACCGGGCAAGCTGGAAAAGCGTGTGTTTCGAGACGAGCCGCTTAAGAGCCTGTCG
9054	CFLAR_9054	CAGTGTTTACTCCTAACGCG	CFLAR	CAGCGCCAATGGGCTTTCGA	CGTCTCACACCG	GTTTCGAGACG	AGCCGCTTAAGAGCCTGTCG	CAGCGCCAATGGGCTTTCGACGTCTCACACCGCAGTGTTTACTCCTAACGCGGTTTCGAGACGAGCCGCTTAAGAGCCTGTCG
9999	CMTR2_9999	GGGTGAAAGGGAGAGGGACA	CMTR2	CAGCGCCAATGGGCTTTCGA	CGTCTCACACCG	GTTTCGAGACG	AGCCGCTTAAGAGCCTGTCG	CAGCGCCAATGGGCTTTCGACGTCTCACACCGGGGTGAAAGGGAGAGGGACAGTTTCGAGACGAGCCGCTTAAGAGCCTGTCG
10084	CNNM4_10084	CGACTGTACCCCCTTAAGGG	CNNM4	CAGCGCCAATGGGCTTTCGA	CGTCTCACACCG	GTTTCGAGACG	AGCCGCTTAAGAGCCTGTCG	CAGCGCCAATGGGCTTTCGACGTCTCACACCGCGACTGTACCCCCTTAAGGGGTTTCGAGACGAGCCGCTTAAGAGCCTGTCG
11511	CUL3_11511	ACGAGATCCGGCCCAGAGGG	CUL3	CAGCGCCAATGGGCTTTCGA	CGTCTCACACCG	GTTTCGAGACG	AGCCGCTTAAGAGCCTGTCG	CAGCGCCAATGGGCTTTCGACGTCTCACACCGACGAGATCCGGCCCAGAGGGGTTTCGAGACGAGCCGCTTAAGAGCCTGTCG
12287	DCUN1D5_12287	GCTGTCTGACCCGTCGACTG	DCUN1D5	CAGCGCCAATGGGCTTTCGA	CGTCTCACACCG	GTTTCGAGACG	AGCCGCTTAAGAGCCTGTCG	CAGCGCCAATGGGCTTTCGACGTCTCACACCGGCTGTCTGACCCGTCGACTGGTTTCGAGACGAGCCGCTTAAGAGCCTGTCG
12288	DCUN1D5_12288	GGTTAGCCTCTGCCACTCGT	DCUN1D5	CAGCGCCAATGGGCTTTCGA	CGTCTCACACCG	GTTTCGAGACG	AGCCGCTTAAGAGCCTGTCG	CAGCGCCAATGGGCTTTCGACGTCTCACACCGGGTTAGCCTCTGCCACTCGTGTTTCGAGACGAGCCGCTTAAGAGCCTGTCG
13448	DOCK9_13448	AAAGCCGGTCTTTATCAGAG	DOCK9	CAGCGCCAATGGGCTTTCGA	CGTCTCACACCG	GTTTCGAGACG	AGCCGCTTAAGAGCCTGTCG	CAGCGCCAATGGGCTTTCGACGTCTCACACCGAAAGCCGGTCTTTATCAGAGGTTTCGAGACGAGCCGCTTAAGAGCCTGTCG
14317	EGFR_14317	GGAGAATGCGAGGAGGAGGG	EGFR	CAGCGCCAATGGGCTTTCGA	CGTCTCACACCG	GTTTCGAGACG	AGCCGCTTAAGAGCCTGTCG	CAGCGCCAATGGGCTTTCGACGTCTCACACCGGGAGAATGCGAGGAGGAGGGGTTTCGAGACGAGCCGCTTAAGAGCCTGTCG
14333	EGR3_14333	GAACATTAGAAAGCAGGAAG	EGR3	CAGCGCCAATGGGCTTTCGA	CGTCTCACACCG	GTTTCGAGACG	AGCCGCTTAAGAGCCTGTCG	CAGCGCCAATGGGCTTTCGACGTCTCACACCGGAACATTAGAAAGCAGGAAGGTTTCGAGACGAGCCGCTTAAGAGCCTGTCG
15083	ERBB3_15083	TCCCTACTCCAGCCTCGCGC	ERBB3	CAGCGCCAATGGGCTTTCGA	CGTCTCACACCG	GTTTCGAGACG	AGCCGCTTAAGAGCCTGTCG	CAGCGCCAATGGGCTTTCGACGTCTCACACCGTCCCTACTCCAGCCTCGCGCGTTTCGAGACGAGCCGCTTAAGAGCCTGTCG
15088	ERC1_15088	CGCCGCGTCACGCTCCCGGG	ERC1	CAGCGCCAATGGGCTTTCGA	CGTCTCACACCG	GTTTCGAGACG	AGCCGCTTAAGAGCCTGTCG	CAGCGCCAATGGGCTTTCGACGTCTCACACCGCGCCGCGTCACGCTCCCGGGGTTTCGAGACGAGCCGCTTAAGAGCCTGTCG
15328	ETV1_15328	GGCGAGGGAGACCCGCGGGA	ETV1	CAGCGCCAATGGGCTTTCGA	CGTCTCACACCG	GTTTCGAGACG	AGCCGCTTAAGAGCCTGTCG	CAGCGCCAATGGGCTTTCGACGTCTCACACCGGGCGAGGGAGACCCGCGGGAGTTTCGAGACGAGCCGCTTAAGAGCCTGTCG
15505	EYA4_15505	CACGAGCCCGCAGTAGCCGG	EYA4	CAGCGCCAATGGGCTTTCGA	CGTCTCACACCG	GTTTCGAGACG	AGCCGCTTAAGAGCCTGTCG	CAGCGCCAATGGGCTTTCGACGTCTCACACCGCACGAGCCCGCAGTAGCCGGGTTTCGAGACGAGCCGCTTAAGAGCCTGTCG
16225	FAM49A_16225	GACGCGGCCGGTGACAGCGC	FAM49A	CAGCGCCAATGGGCTTTCGA	CGTCTCACACCG	GTTTCGAGACG	AGCCGCTTAAGAGCCTGTCG	CAGCGCCAATGGGCTTTCGACGTCTCACACCGGACGCGGCCGGTGACAGCGCGTTTCGAGACGAGCCGCTTAAGAGCCTGTCG
16227	FAM49A_16227	GGACGCGGCCGGTGACAGCG	FAM49A	CAGCGCCAATGGGCTTTCGA	CGTCTCACACCG	GTTTCGAGACG	AGCCGCTTAAGAGCCTGTCG	CAGCGCCAATGGGCTTTCGACGTCTCACACCGGGACGCGGCCGGTGACAGCGGTTTCGAGACGAGCCGCTTAAGAGCCTGTCG
16465	FAS_16465	GGTGTTCAAAGACGCTTCTG	FAS	CAGCGCCAATGGGCTTTCGA	CGTCTCACACCG	GTTTCGAGACG	AGCCGCTTAAGAGCCTGTCG	CAGCGCCAATGGGCTTTCGACGTCTCACACCGGGTGTTCAAAGACGCTTCTGGTTTCGAGACGAGCCGCTTAAGAGCCTGTCG
16466	FASLG_16466	GCTTCAGCTGCAAAGTGAGT	FASLG	CAGCGCCAATGGGCTTTCGA	CGTCTCACACCG	GTTTCGAGACG	AGCCGCTTAAGAGCCTGTCG	CAGCGCCAATGGGCTTTCGACGTCTCACACCGGCTTCAGCTGCAAAGTGAGTGTTTCGAGACGAGCCGCTTAAGAGCCTGTCG
16469	FASN_16469	CACGAGCATCACCCCACCGG	FASN	CAGCGCCAATGGGCTTTCGA	CGTCTCACACCG	GTTTCGAGACG	AGCCGCTTAAGAGCCTGTCG	CAGCGCCAATGGGCTTTCGACGTCTCACACCGCACGAGCATCACCCCACCGGGTTTCGAGACGAGCCGCTTAAGAGCCTGTCG
16471	FASN_16471	GCGCACGAGCATCACCCCAC	FASN	CAGCGCCAATGGGCTTTCGA	CGTCTCACACCG	GTTTCGAGACG	AGCCGCTTAAGAGCCTGTCG	CAGCGCCAATGGGCTTTCGACGTCTCACACCGGCGCACGAGCATCACCCCACGTTTCGAGACGAGCCGCTTAAGAGCCTGTCG
17191	FLG_17191	GATGAGTACGTGAGGAAGCT	FLG	CAGCGCCAATGGGCTTTCGA	CGTCTCACACCG	GTTTCGAGACG	AGCCGCTTAAGAGCCTGTCG	CAGCGCCAATGGGCTTTCGACGTCTCACACCGGATGAGTACGTGAGGAAGCTGTTTCGAGACGAGCCGCTTAAGAGCCTGTCG
17193	FLG_17193	GGTTGCTGGAGAAATAGAGG	FLG	CAGCGCCAATGGGCTTTCGA	CGTCTCACACCG	GTTTCGAGACG	AGCCGCTTAAGAGCCTGTCG	CAGCGCCAATGGGCTTTCGACGTCTCACACCGGGTTGCTGGAGAAATAGAGGGTTTCGAGACGAGCCGCTTAAGAGCCTGTCG
17329	FNDC3B_17329	CTGCGAGTCTGCGATTGTGG	FNDC3B	CAGCGCCAATGGGCTTTCGA	CGTCTCACACCG	GTTTCGAGACG	AGCCGCTTAAGAGCCTGTCG	CAGCGCCAATGGGCTTTCGACGTCTCACACCGCTGCGAGTCTGCGATTGTGGGTTTCGAGACGAGCCGCTTAAGAGCCTGTCG
17438	FOXD4L6_17438	GAGTCTGCCCTTACCCAGAA	FOXD4L6	CAGCGCCAATGGGCTTTCGA	CGTCTCACACCG	GTTTCGAGACG	AGCCGCTTAAGAGCCTGTCG	CAGCGCCAATGGGCTTTCGACGTCTCACACCGGAGTCTGCCCTTACCCAGAAGTTTCGAGACGAGCCGCTTAAGAGCCTGTCG
17448	FOXF1_17448	TGCACCTCTGCCGTCATCGG	FOXF1	CAGCGCCAATGGGCTTTCGA	CGTCTCACACCG	GTTTCGAGACG	AGCCGCTTAAGAGCCTGTCG	CAGCGCCAATGGGCTTTCGACGTCTCACACCGTGCACCTCTGCCGTCATCGGGTTTCGAGACGAGCCGCTTAAGAGCCTGTCG
17800	FXR1_17800	TCCCACCTGGAGAGTCGGGG	FXR1	CAGCGCCAATGGGCTTTCGA	CGTCTCACACCG	GTTTCGAGACG	AGCCGCTTAAGAGCCTGTCG	CAGCGCCAATGGGCTTTCGACGTCTCACACCGTCCCACCTGGAGAGTCGGGGGTTTCGAGACGAGCCGCTTAAGAGCCTGTCG
18276	GBX2_18276	CCACCCAAGCTGGCCTCGAG	GBX2	CAGCGCCAATGGGCTTTCGA	CGTCTCACACCG	GTTTCGAGACG	AGCCGCTTAAGAGCCTGTCG	CAGCGCCAATGGGCTTTCGACGTCTCACACCGCCACCCAAGCTGGCCTCGAGGTTTCGAGACGAGCCGCTTAAGAGCCTGTCG
18806	GLIS3_18806	TGTGTGTGAATGCGTCAAGA	GLIS3	CAGCGCCAATGGGCTTTCGA	CGTCTCACACCG	GTTTCGAGACG	AGCCGCTTAAGAGCCTGTCG	CAGCGCCAATGGGCTTTCGACGTCTCACACCGTGTGTGTGAATGCGTCAAGAGTTTCGAGACGAGCCGCTTAAGAGCCTGTCG
19391	GPR137B_19391	CGGGGGCGCGCGGGGCCGGT	GPR137B	CAGCGCCAATGGGCTTTCGA	CGTCTCACACCG	GTTTCGAGACG	AGCCGCTTAAGAGCCTGTCG	CAGCGCCAATGGGCTTTCGACGTCTCACACCGCGGGGGCGCGCGGGGCCGGTGTTTCGAGACGAGCCGCTTAAGAGCCTGTCG
19664	GRAMD1A_19664	CTGTCCAGTCCCTCTCTCCC	GRAMD1A	CAGCGCCAATGGGCTTTCGA	CGTCTCACACCG	GTTTCGAGACG	AGCCGCTTAAGAGCCTGTCG	CAGCGCCAATGGGCTTTCGACGTCTCACACCGCTGTCCAGTCCCTCTCTCCCGTTTCGAGACGAGCCGCTTAAGAGCCTGTCG
19911	GSK3B_19911	ATTCCCAGACGCCTGTTACG	GSK3B	CAGCGCCAATGGGCTTTCGA	CGTCTCACACCG	GTTTCGAGACG	AGCCGCTTAAGAGCCTGTCG	CAGCGCCAATGGGCTTTCGACGTCTCACACCGATTCCCAGACGCCTGTTACGGTTTCGAGACGAGCCGCTTAAGAGCCTGTCG
19912	GSK3B_19912	CCAGACGCCTGTTACGCGGG	GSK3B	CAGCGCCAATGGGCTTTCGA	CGTCTCACACCG	GTTTCGAGACG	AGCCGCTTAAGAGCCTGTCG	CAGCGCCAATGGGCTTTCGACGTCTCACACCGCCAGACGCCTGTTACGCGGGGTTTCGAGACGAGCCGCTTAAGAGCCTGTCG
19986	GSX1_19986	GGCACAAAAACCCTATTGAG	GSX1	CAGCGCCAATGGGCTTTCGA	CGTCTCACACCG	GTTTCGAGACG	AGCCGCTTAAGAGCCTGTCG	CAGCGCCAATGGGCTTTCGACGTCTCACACCGGGCACAAAAACCCTATTGAGGTTTCGAGACGAGCCGCTTAAGAGCCTGTCG
20301	HAND2_20301	GAGGTAGCCAATCCTGGAAG	HAND2	CAGCGCCAATGGGCTTTCGA	CGTCTCACACCG	GTTTCGAGACG	AGCCGCTTAAGAGCCTGTCG	CAGCGCCAATGGGCTTTCGACGTCTCACACCGGAGGTAGCCAATCCTGGAAGGTTTCGAGACGAGCCGCTTAAGAGCCTGTCG
20678	HEXIM1_20678	AAGATAAGAACTACGACTCC	HEXIM1	CAGCGCCAATGGGCTTTCGA	CGTCTCACACCG	GTTTCGAGACG	AGCCGCTTAAGAGCCTGTCG	CAGCGCCAATGGGCTTTCGACGTCTCACACCGAAGATAAGAACTACGACTCCGTTTCGAGACGAGCCGCTTAAGAGCCTGTCG
20679	HEXIM1_20679	CGTGCGACGTAGCCAATCCC	HEXIM1	CAGCGCCAATGGGCTTTCGA	CGTCTCACACCG	GTTTCGAGACG	AGCCGCTTAAGAGCCTGTCG	CAGCGCCAATGGGCTTTCGACGTCTCACACCGCGTGCGACGTAGCCAATCCCGTTTCGAGACGAGCCGCTTAAGAGCCTGTCG
20793	HINT1_20793	CAGCGCGCTAGAGCGCCTCA	HINT1	CAGCGCCAATGGGCTTTCGA	CGTCTCACACCG	GTTTCGAGACG	AGCCGCTTAAGAGCCTGTCG	CAGCGCCAATGGGCTTTCGACGTCTCACACCGCAGCGCGCTAGAGCGCCTCAGTTTCGAGACGAGCCGCTTAAGAGCCTGTCG
21780	HTR2A_21780	CAAGGTAGCAACAGCCAGGA	HTR2A	CAGCGCCAATGGGCTTTCGA	CGTCTCACACCG	GTTTCGAGACG	AGCCGCTTAAGAGCCTGTCG	CAGCGCCAATGGGCTTTCGACGTCTCACACCGCAAGGTAGCAACAGCCAGGAGTTTCGAGACGAGCCGCTTAAGAGCCTGTCG
21782	HTR2A_21782	GGTAGCAACAGCCAGGAGGG	HTR2A	CAGCGCCAATGGGCTTTCGA	CGTCTCACACCG	GTTTCGAGACG	AGCCGCTTAAGAGCCTGTCG	CAGCGCCAATGGGCTTTCGACGTCTCACACCGGGTAGCAACAGCCAGGAGGGGTTTCGAGACGAGCCGCTTAAGAGCCTGTCG
21814	HTR7_21814	ATCCCGTCCCAGGAGCGCGA	HTR7	CAGCGCCAATGGGCTTTCGA	CGTCTCACACCG	GTTTCGAGACG	AGCCGCTTAAGAGCCTGTCG	CAGCGCCAATGGGCTTTCGACGTCTCACACCGATCCCGTCCCAGGAGCGCGAGTTTCGAGACGAGCCGCTTAAGAGCCTGTCG
21942	ID2_21942	GAGCGGGCGCTTCCATTGGT	ID2	CAGCGCCAATGGGCTTTCGA	CGTCTCACACCG	GTTTCGAGACG	AGCCGCTTAAGAGCCTGTCG	CAGCGCCAATGGGCTTTCGACGTCTCACACCGGAGCGGGCGCTTCCATTGGTGTTTCGAGACGAGCCGCTTAAGAGCCTGTCG
21943	ID2_21943	GCACGTCTATCAAGACGAGC	ID2	CAGCGCCAATGGGCTTTCGA	CGTCTCACACCG	GTTTCGAGACG	AGCCGCTTAAGAGCCTGTCG	CAGCGCCAATGGGCTTTCGACGTCTCACACCGGCACGTCTATCAAGACGAGCGTTTCGAGACGAGCCGCTTAAGAGCCTGTCG
22032	IFI44L_22032	GCCTGCCTACATACATACAA	IFI44L	CAGCGCCAATGGGCTTTCGA	CGTCTCACACCG	GTTTCGAGACG	AGCCGCTTAAGAGCCTGTCG	CAGCGCCAATGGGCTTTCGACGTCTCACACCGGCCTGCCTACATACATACAAGTTTCGAGACGAGCCGCTTAAGAGCCTGTCG
22635	ILKAP_22635	CGCCCCGACTGCGAGCCGGG	ILKAP	CAGCGCCAATGGGCTTTCGA	CGTCTCACACCG	GTTTCGAGACG	AGCCGCTTAAGAGCCTGTCG	CAGCGCCAATGGGCTTTCGACGTCTCACACCGCGCCCCGACTGCGAGCCGGGGTTTCGAGACGAGCCGCTTAAGAGCCTGTCG
22636	ILKAP_22636	GAAACACCGCGGGGCCCAGA	ILKAP	CAGCGCCAATGGGCTTTCGA	CGTCTCACACCG	GTTTCGAGACG	AGCCGCTTAAGAGCCTGTCG	CAGCGCCAATGGGCTTTCGACGTCTCACACCGGAAACACCGCGGGGCCCAGAGTTTCGAGACGAGCCGCTTAAGAGCCTGTCG
22810	INSM2_22810	GGAGTAGACGAATCTGGCGG	INSM2	CAGCGCCAATGGGCTTTCGA	CGTCTCACACCG	GTTTCGAGACG	AGCCGCTTAAGAGCCTGTCG	CAGCGCCAATGGGCTTTCGACGTCTCACACCGGGAGTAGACGAATCTGGCGGGTTTCGAGACGAGCCGCTTAAGAGCCTGTCG
23055	IRX5_23055	AGAGGGCGAGGCGCGCCTGG	IRX5	CAGCGCCAATGGGCTTTCGA	CGTCTCACACCG	GTTTCGAGACG	AGCCGCTTAAGAGCCTGTCG	CAGCGCCAATGGGCTTTCGACGTCTCACACCGAGAGGGCGAGGCGCGCCTGGGTTTCGAGACGAGCCGCTTAAGAGCCTGTCG
23151	ITGA6_23151	CAGAGCCGGCGGGTAAGGTG	ITGA6	CAGCGCCAATGGGCTTTCGA	CGTCTCACACCG	GTTTCGAGACG	AGCCGCTTAAGAGCCTGTCG	CAGCGCCAATGGGCTTTCGACGTCTCACACCGCAGAGCCGGCGGGTAAGGTGGTTTCGAGACGAGCCGCTTAAGAGCCTGTCG
23153	ITGA6_23153	GCCGGCGGGTAAGGTGCGGG	ITGA6	CAGCGCCAATGGGCTTTCGA	CGTCTCACACCG	GTTTCGAGACG	AGCCGCTTAAGAGCCTGTCG	CAGCGCCAATGGGCTTTCGACGTCTCACACCGGCCGGCGGGTAAGGTGCGGGGTTTCGAGACGAGCCGCTTAAGAGCCTGTCG
23203	ITGB5_23203	CAGAGTGTGCCGGCGCGCGG	ITGB5	CAGCGCCAATGGGCTTTCGA	CGTCTCACACCG	GTTTCGAGACG	AGCCGCTTAAGAGCCTGTCG	CAGCGCCAATGGGCTTTCGACGTCTCACACCGCAGAGTGTGCCGGCGCGCGGGTTTCGAGACGAGCCGCTTAAGAGCCTGTCG
23204	ITGB5_23204	GCAGAGTGTGCCGGCGCGCG	ITGB5	CAGCGCCAATGGGCTTTCGA	CGTCTCACACCG	GTTTCGAGACG	AGCCGCTTAAGAGCCTGTCG	CAGCGCCAATGGGCTTTCGACGTCTCACACCGGCAGAGTGTGCCGGCGCGCGGTTTCGAGACGAGCCGCTTAAGAGCCTGTCG
23247	ITM2B_23247	CCCGCGCAGCACCCCACCCC	ITM2B	CAGCGCCAATGGGCTTTCGA	CGTCTCACACCG	GTTTCGAGACG	AGCCGCTTAAGAGCCTGTCG	CAGCGCCAATGGGCTTTCGACGTCTCACACCGCCCGCGCAGCACCCCACCCCGTTTCGAGACGAGCCGCTTAAGAGCCTGTCG
24044	KIAA0368_24044	CCGGGACTGAGTCAGCGCCG	KIAA0368	CAGCGCCAATGGGCTTTCGA	CGTCTCACACCG	GTTTCGAGACG	AGCCGCTTAAGAGCCTGTCG	CAGCGCCAATGGGCTTTCGACGTCTCACACCGCCGGGACTGAGTCAGCGCCGGTTTCGAGACGAGCCGCTTAAGAGCCTGTCG
24156	KIAA1551_24156	CTCTGGTGGCACTAGGACCG	KIAA1551	CAGCGCCAATGGGCTTTCGA	CGTCTCACACCG	GTTTCGAGACG	AGCCGCTTAAGAGCCTGTCG	CAGCGCCAATGGGCTTTCGACGTCTCACACCGCTCTGGTGGCACTAGGACCGGTTTCGAGACGAGCCGCTTAAGAGCCTGTCG
24158	KIAA1551_24158	TGGTGGCACTAGGACCGCGG	KIAA1551	CAGCGCCAATGGGCTTTCGA	CGTCTCACACCG	GTTTCGAGACG	AGCCGCTTAAGAGCCTGTCG	CAGCGCCAATGGGCTTTCGACGTCTCACACCGTGGTGGCACTAGGACCGCGGGTTTCGAGACGAGCCGCTTAAGAGCCTGTCG
24391	KLF10_24391	GGGCAGAGGGAACACGCTGC	KLF10	CAGCGCCAATGGGCTTTCGA	CGTCTCACACCG	GTTTCGAGACG	AGCCGCTTAAGAGCCTGTCG	CAGCGCCAATGGGCTTTCGACGTCTCACACCGGGGCAGAGGGAACACGCTGCGTTTCGAGACGAGCCGCTTAAGAGCCTGTCG
24414	KLF2_24414	AGCCGCGGTATATAAGCCGG	KLF2	CAGCGCCAATGGGCTTTCGA	CGTCTCACACCG	GTTTCGAGACG	AGCCGCTTAAGAGCCTGTCG	CAGCGCCAATGGGCTTTCGACGTCTCACACCGAGCCGCGGTATATAAGCCGGGTTTCGAGACGAGCCGCTTAAGAGCCTGTCG
24708	KPNA3_24708	GCGAGGTGGCAGTAGCGCCG	KPNA3	CAGCGCCAATGGGCTTTCGA	CGTCTCACACCG	GTTTCGAGACG	AGCCGCTTAAGAGCCTGTCG	CAGCGCCAATGGGCTTTCGACGTCTCACACCGGCGAGGTGGCAGTAGCGCCGGTTTCGAGACGAGCCGCTTAAGAGCCTGTCG
24709	KPNA3_24709	TACTGCCACCTCGCGCTCGG	KPNA3	CAGCGCCAATGGGCTTTCGA	CGTCTCACACCG	GTTTCGAGACG	AGCCGCTTAAGAGCCTGTCG	CAGCGCCAATGGGCTTTCGACGTCTCACACCGTACTGCCACCTCGCGCTCGGGTTTCGAGACGAGCCGCTTAAGAGCCTGTCG
24783	KRT16_24783	CACACAGCAGAGTTGATCCT	KRT16	CAGCGCCAATGGGCTTTCGA	CGTCTCACACCG	GTTTCGAGACG	AGCCGCTTAAGAGCCTGTCG	CAGCGCCAATGGGCTTTCGACGTCTCACACCGCACACAGCAGAGTTGATCCTGTTTCGAGACGAGCCGCTTAAGAGCCTGTCG
25373	LAPTM4B_25373	AAGGCCCGGACCTCCACTCA	LAPTM4B	CAGCGCCAATGGGCTTTCGA	CGTCTCACACCG	GTTTCGAGACG	AGCCGCTTAAGAGCCTGTCG	CAGCGCCAATGGGCTTTCGACGTCTCACACCGAAGGCCCGGACCTCCACTCAGTTTCGAGACGAGCCGCTTAAGAGCCTGTCG
25424	LATS2_25424	CGGCCGCATACCAGTCCGGG	LATS2	CAGCGCCAATGGGCTTTCGA	CGTCTCACACCG	GTTTCGAGACG	AGCCGCTTAAGAGCCTGTCG	CAGCGCCAATGGGCTTTCGACGTCTCACACCGCGGCCGCATACCAGTCCGGGGTTTCGAGACGAGCCGCTTAAGAGCCTGTCG
26603	LRRC15_26603	GTACCCTGTAGTGTCAGCCC	LRRC15	CAGCGCCAATGGGCTTTCGA	CGTCTCACACCG	GTTTCGAGACG	AGCCGCTTAAGAGCCTGTCG	CAGCGCCAATGGGCTTTCGACGTCTCACACCGGTACCCTGTAGTGTCAGCCCGTTTCGAGACGAGCCGCTTAAGAGCCTGTCG
27402	MAML2_27402	GTAATCGCAGCCAGGCACCG	MAML2	CAGCGCCAATGGGCTTTCGA	CGTCTCACACCG	GTTTCGAGACG	AGCCGCTTAAGAGCCTGTCG	CAGCGCCAATGGGCTTTCGACGTCTCACACCGGTAATCGCAGCCAGGCACCGGTTTCGAGACGAGCCGCTTAAGAGCCTGTCG
27474	MAP1B_27474	CCCGGCACATCCTCACGCGG	MAP1B	CAGCGCCAATGGGCTTTCGA	CGTCTCACACCG	GTTTCGAGACG	AGCCGCTTAAGAGCCTGTCG	CAGCGCCAATGGGCTTTCGACGTCTCACACCGCCCGGCACATCCTCACGCGGGTTTCGAGACGAGCCGCTTAAGAGCCTGTCG
27475	MAP1B_27475	CCGCGTGAGGATGTGCCGGG	MAP1B	CAGCGCCAATGGGCTTTCGA	CGTCTCACACCG	GTTTCGAGACG	AGCCGCTTAAGAGCCTGTCG	CAGCGCCAATGGGCTTTCGACGTCTCACACCGCCGCGTGAGGATGTGCCGGGGTTTCGAGACGAGCCGCTTAAGAGCCTGTCG
27487	MAP1LC3C_27487	TTCTCTGACCAGCAAGCAGG	MAP1LC3C	CAGCGCCAATGGGCTTTCGA	CGTCTCACACCG	GTTTCGAGACG	AGCCGCTTAAGAGCCTGTCG	CAGCGCCAATGGGCTTTCGACGTCTCACACCGTTCTCTGACCAGCAAGCAGGGTTTCGAGACGAGCCGCTTAAGAGCCTGTCG
27548	MAP3K3_27548	CTCACCAGCCAATAACAAGA	MAP3K3	CAGCGCCAATGGGCTTTCGA	CGTCTCACACCG	GTTTCGAGACG	AGCCGCTTAAGAGCCTGTCG	CAGCGCCAATGGGCTTTCGACGTCTCACACCGCTCACCAGCCAATAACAAGAGTTTCGAGACGAGCCGCTTAAGAGCCTGTCG
27868	MBTD1_27868	GCCTGCAGAGGGTCCCACGG	MBTD1	CAGCGCCAATGGGCTTTCGA	CGTCTCACACCG	GTTTCGAGACG	AGCCGCTTAAGAGCCTGTCG	CAGCGCCAATGGGCTTTCGACGTCTCACACCGGCCTGCAGAGGGTCCCACGGGTTTCGAGACGAGCCGCTTAAGAGCCTGTCG
27916	MCF2_27916	CTTAGCCTGATTGAACCTTG	MCF2	CAGCGCCAATGGGCTTTCGA	CGTCTCACACCG	GTTTCGAGACG	AGCCGCTTAAGAGCCTGTCG	CAGCGCCAATGGGCTTTCGACGTCTCACACCGCTTAGCCTGATTGAACCTTGGTTTCGAGACGAGCCGCTTAAGAGCCTGTCG
27979	MCOLN3_27979	CCACCTGTGCTCCTGAAAAG	MCOLN3	CAGCGCCAATGGGCTTTCGA	CGTCTCACACCG	GTTTCGAGACG	AGCCGCTTAAGAGCCTGTCG	CAGCGCCAATGGGCTTTCGACGTCTCACACCGCCACCTGTGCTCCTGAAAAGGTTTCGAGACGAGCCGCTTAAGAGCCTGTCG
28674	MITD1_28674	CAGGCTTTGAGTGTAGCACT	MITD1	CAGCGCCAATGGGCTTTCGA	CGTCTCACACCG	GTTTCGAGACG	AGCCGCTTAAGAGCCTGTCG	CAGCGCCAATGGGCTTTCGACGTCTCACACCGCAGGCTTTGAGTGTAGCACTGTTTCGAGACGAGCCGCTTAAGAGCCTGTCG
29560	MSI1_29560	GGGGCTTTATGCGCGCAGGG	MSI1	CAGCGCCAATGGGCTTTCGA	CGTCTCACACCG	GTTTCGAGACG	AGCCGCTTAAGAGCCTGTCG	CAGCGCCAATGGGCTTTCGACGTCTCACACCGGGGGCTTTATGCGCGCAGGGGTTTCGAGACGAGCCGCTTAAGAGCCTGTCG
30002	MXI1_30002	GGACCGGTCAAAATAAAAGG	MXI1	CAGCGCCAATGGGCTTTCGA	CGTCTCACACCG	GTTTCGAGACG	AGCCGCTTAAGAGCCTGTCG	CAGCGCCAATGGGCTTTCGACGTCTCACACCGGGACCGGTCAAAATAAAAGGGTTTCGAGACGAGCCGCTTAAGAGCCTGTCG
30045	MYC_30045	CCCCCGAGCTGTGCTGCTCG	MYC	CAGCGCCAATGGGCTTTCGA	CGTCTCACACCG	GTTTCGAGACG	AGCCGCTTAAGAGCCTGTCG	CAGCGCCAATGGGCTTTCGACGTCTCACACCGCCCCCGAGCTGTGCTGCTCGGTTTCGAGACGAGCCGCTTAAGAGCCTGTCG
30051	MYCBP2_30051	ACCCAAAGCCCCGAGGCGGA	MYCBP2	CAGCGCCAATGGGCTTTCGA	CGTCTCACACCG	GTTTCGAGACG	AGCCGCTTAAGAGCCTGTCG	CAGCGCCAATGGGCTTTCGACGTCTCACACCGACCCAAAGCCCCGAGGCGGAGTTTCGAGACGAGCCGCTTAAGAGCCTGTCG
30053	MYCBP2_30053	GCCCCAAACCCAAAGCCCCG	MYCBP2	CAGCGCCAATGGGCTTTCGA	CGTCTCACACCG	GTTTCGAGACG	AGCCGCTTAAGAGCCTGTCG	CAGCGCCAATGGGCTTTCGACGTCTCACACCGGCCCCAAACCCAAAGCCCCGGTTTCGAGACGAGCCGCTTAAGAGCCTGTCG
30213	MYO1D_30213	CCGCCCAGGTGAAGAGGCGG	MYO1D	CAGCGCCAATGGGCTTTCGA	CGTCTCACACCG	GTTTCGAGACG	AGCCGCTTAAGAGCCTGTCG	CAGCGCCAATGGGCTTTCGACGTCTCACACCGCCGCCCAGGTGAAGAGGCGGGTTTCGAGACGAGCCGCTTAAGAGCCTGTCG
30215	MYO1D_30215	GGCTGGGGCGGGCTCCTCAG	MYO1D	CAGCGCCAATGGGCTTTCGA	CGTCTCACACCG	GTTTCGAGACG	AGCCGCTTAAGAGCCTGTCG	CAGCGCCAATGGGCTTTCGACGTCTCACACCGGGCTGGGGCGGGCTCCTCAGGTTTCGAGACGAGCCGCTTAAGAGCCTGTCG
30300	MYRF_30300	ACGCTCCCGACTCCTGCAGG	MYRF	CAGCGCCAATGGGCTTTCGA	CGTCTCACACCG	GTTTCGAGACG	AGCCGCTTAAGAGCCTGTCG	CAGCGCCAATGGGCTTTCGACGTCTCACACCGACGCTCCCGACTCCTGCAGGGTTTCGAGACGAGCCGCTTAAGAGCCTGTCG
30853	NDUFA4L2_30853	AAAGTGAGCTAAGTTGGGGT	NDUFA4L2	CAGCGCCAATGGGCTTTCGA	CGTCTCACACCG	GTTTCGAGACG	AGCCGCTTAAGAGCCTGTCG	CAGCGCCAATGGGCTTTCGACGTCTCACACCGAAAGTGAGCTAAGTTGGGGTGTTTCGAGACGAGCCGCTTAAGAGCCTGTCG
30854	NDUFA4L2_30854	GGAGAAAGTGAGCTAAGTTG	NDUFA4L2	CAGCGCCAATGGGCTTTCGA	CGTCTCACACCG	GTTTCGAGACG	AGCCGCTTAAGAGCCTGTCG	CAGCGCCAATGGGCTTTCGACGTCTCACACCGGGAGAAAGTGAGCTAAGTTGGTTTCGAGACGAGCCGCTTAAGAGCCTGTCG
31174	NFATC1_31174	CGCTCGGCGACTCGTCCCCG	NFATC1	CAGCGCCAATGGGCTTTCGA	CGTCTCACACCG	GTTTCGAGACG	AGCCGCTTAAGAGCCTGTCG	CAGCGCCAATGGGCTTTCGACGTCTCACACCGCGCTCGGCGACTCGTCCCCGGTTTCGAGACGAGCCGCTTAAGAGCCTGTCG
31175	NFATC1_31175	GCAGCAGGGGCGTGATGTCA	NFATC1	CAGCGCCAATGGGCTTTCGA	CGTCTCACACCG	GTTTCGAGACG	AGCCGCTTAAGAGCCTGTCG	CAGCGCCAATGGGCTTTCGACGTCTCACACCGGCAGCAGGGGCGTGATGTCAGTTTCGAGACGAGCCGCTTAAGAGCCTGTCG
31440	NKX2-1_31440	GGGGATCGACTGCCTCCCGG	NKX2-1	CAGCGCCAATGGGCTTTCGA	CGTCTCACACCG	GTTTCGAGACG	AGCCGCTTAAGAGCCTGTCG	CAGCGCCAATGGGCTTTCGACGTCTCACACCGGGGGATCGACTGCCTCCCGGGTTTCGAGACGAGCCGCTTAAGAGCCTGTCG
32478	NR1D1_32478	AGGCGCTCCCTGGGATCACA	NR1D1	CAGCGCCAATGGGCTTTCGA	CGTCTCACACCG	GTTTCGAGACG	AGCCGCTTAAGAGCCTGTCG	CAGCGCCAATGGGCTTTCGACGTCTCACACCGAGGCGCTCCCTGGGATCACAGTTTCGAGACGAGCCGCTTAAGAGCCTGTCG
32509	NR2E1_32509	GAGTTGGGGGAAAAGCTAAG	NR2E1	CAGCGCCAATGGGCTTTCGA	CGTCTCACACCG	GTTTCGAGACG	AGCCGCTTAAGAGCCTGTCG	CAGCGCCAATGGGCTTTCGACGTCTCACACCGGAGTTGGGGGAAAAGCTAAGGTTTCGAGACGAGCCGCTTAAGAGCCTGTCG
32616	NRP1_32616	ATTACAGGCGAGCCCAAGCG	NRP1	CAGCGCCAATGGGCTTTCGA	CGTCTCACACCG	GTTTCGAGACG	AGCCGCTTAAGAGCCTGTCG	CAGCGCCAATGGGCTTTCGACGTCTCACACCGATTACAGGCGAGCCCAAGCGGTTTCGAGACGAGCCGCTTAAGAGCCTGTCG
32617	NRP1_32617	CAATTACAGGCGAGCCCAAG	NRP1	CAGCGCCAATGGGCTTTCGA	CGTCTCACACCG	GTTTCGAGACG	AGCCGCTTAAGAGCCTGTCG	CAGCGCCAATGGGCTTTCGACGTCTCACACCGCAATTACAGGCGAGCCCAAGGTTTCGAGACGAGCCGCTTAAGAGCCTGTCG
32619	NRP2_32619	AGAGCTATCCGATTACGCGC	NRP2	CAGCGCCAATGGGCTTTCGA	CGTCTCACACCG	GTTTCGAGACG	AGCCGCTTAAGAGCCTGTCG	CAGCGCCAATGGGCTTTCGACGTCTCACACCGAGAGCTATCCGATTACGCGCGTTTCGAGACGAGCCGCTTAAGAGCCTGTCG
32620	NRP2_32620	CCTGATTAAAGAGGCAGCCG	NRP2	CAGCGCCAATGGGCTTTCGA	CGTCTCACACCG	GTTTCGAGACG	AGCCGCTTAAGAGCCTGTCG	CAGCGCCAATGGGCTTTCGACGTCTCACACCGCCTGATTAAAGAGGCAGCCGGTTTCGAGACGAGCCGCTTAAGAGCCTGTCG
34567	OSR2_34567	AGTGGACCATTAGCAGACGC	OSR2	CAGCGCCAATGGGCTTTCGA	CGTCTCACACCG	GTTTCGAGACG	AGCCGCTTAAGAGCCTGTCG	CAGCGCCAATGGGCTTTCGACGTCTCACACCGAGTGGACCATTAGCAGACGCGTTTCGAGACGAGCCGCTTAAGAGCCTGTCG
34569	OSR2_34569	TTAGCAGACGCCGGGCGCGG	OSR2	CAGCGCCAATGGGCTTTCGA	CGTCTCACACCG	GTTTCGAGACG	AGCCGCTTAAGAGCCTGTCG	CAGCGCCAATGGGCTTTCGACGTCTCACACCGTTAGCAGACGCCGGGCGCGGGTTTCGAGACGAGCCGCTTAAGAGCCTGTCG
34607	OTOP2_34607	AGAAAGATGGATCATGTGAG	OTOP2	CAGCGCCAATGGGCTTTCGA	CGTCTCACACCG	GTTTCGAGACG	AGCCGCTTAAGAGCCTGTCG	CAGCGCCAATGGGCTTTCGACGTCTCACACCGAGAAAGATGGATCATGTGAGGTTTCGAGACGAGCCGCTTAAGAGCCTGTCG
34899	PAGE4_34899	AGCCCTCTCCCGCCTCCTAG	PAGE4	CAGCGCCAATGGGCTTTCGA	CGTCTCACACCG	GTTTCGAGACG	AGCCGCTTAAGAGCCTGTCG	CAGCGCCAATGGGCTTTCGACGTCTCACACCGAGCCCTCTCCCGCCTCCTAGGTTTCGAGACGAGCCGCTTAAGAGCCTGTCG
35283	PCDH18_35283	CTGATGGAGTCACCCAAGGA	PCDH18	CAGCGCCAATGGGCTTTCGA	CGTCTCACACCG	GTTTCGAGACG	AGCCGCTTAAGAGCCTGTCG	CAGCGCCAATGGGCTTTCGACGTCTCACACCGCTGATGGAGTCACCCAAGGAGTTTCGAGACGAGCCGCTTAAGAGCCTGTCG
35605	PDCD5_35605	AGCTCGACCGCCTGAAATCG	PDCD5	CAGCGCCAATGGGCTTTCGA	CGTCTCACACCG	GTTTCGAGACG	AGCCGCTTAAGAGCCTGTCG	CAGCGCCAATGGGCTTTCGACGTCTCACACCGAGCTCGACCGCCTGAAATCGGTTTCGAGACGAGCCGCTTAAGAGCCTGTCG
35607	PDCD5_35607	GGGTGGGAGGTGGATCCCGG	PDCD5	CAGCGCCAATGGGCTTTCGA	CGTCTCACACCG	GTTTCGAGACG	AGCCGCTTAAGAGCCTGTCG	CAGCGCCAATGGGCTTTCGACGTCTCACACCGGGGTGGGAGGTGGATCCCGGGTTTCGAGACGAGCCGCTTAAGAGCCTGTCG
35799	PDPN_35799	GGCCAAACAGAGCCCGAGGG	PDPN	CAGCGCCAATGGGCTTTCGA	CGTCTCACACCG	GTTTCGAGACG	AGCCGCTTAAGAGCCTGTCG	CAGCGCCAATGGGCTTTCGACGTCTCACACCGGGCCAAACAGAGCCCGAGGGGTTTCGAGACGAGCCGCTTAAGAGCCTGTCG
36528	PIM1_36528	GGCCGGCCGAGGGAGGAGAG	PIM1	CAGCGCCAATGGGCTTTCGA	CGTCTCACACCG	GTTTCGAGACG	AGCCGCTTAAGAGCCTGTCG	CAGCGCCAATGGGCTTTCGACGTCTCACACCGGGCCGGCCGAGGGAGGAGAGGTTTCGAGACGAGCCGCTTAAGAGCCTGTCG
36615	PITX1_36615	GGGCGGCAGTGAGGGCGCGG	PITX1	CAGCGCCAATGGGCTTTCGA	CGTCTCACACCG	GTTTCGAGACG	AGCCGCTTAAGAGCCTGTCG	CAGCGCCAATGGGCTTTCGACGTCTCACACCGGGGCGGCAGTGAGGGCGCGGGTTTCGAGACGAGCCGCTTAAGAGCCTGTCG
36814	PLAUR_36814	CCGGGAAGGGAAGTTTGTGG	PLAUR	CAGCGCCAATGGGCTTTCGA	CGTCTCACACCG	GTTTCGAGACG	AGCCGCTTAAGAGCCTGTCG	CAGCGCCAATGGGCTTTCGACGTCTCACACCGCCGGGAAGGGAAGTTTGTGGGTTTCGAGACGAGCCGCTTAAGAGCCTGTCG
37829	PPP1R14B_37829	AGGGGAGGGTCTATTCGGCA	PPP1R14B	CAGCGCCAATGGGCTTTCGA	CGTCTCACACCG	GTTTCGAGACG	AGCCGCTTAAGAGCCTGTCG	CAGCGCCAATGGGCTTTCGACGTCTCACACCGAGGGGAGGGTCTATTCGGCAGTTTCGAGACGAGCCGCTTAAGAGCCTGTCG
37830	PPP1R14B_37830	CCTCCCCTACCCCTGCCCGG	PPP1R14B	CAGCGCCAATGGGCTTTCGA	CGTCTCACACCG	GTTTCGAGACG	AGCCGCTTAAGAGCCTGTCG	CAGCGCCAATGGGCTTTCGACGTCTCACACCGCCTCCCCTACCCCTGCCCGGGTTTCGAGACGAGCCGCTTAAGAGCCTGTCG
38152	PRDM1_38152	CGGCTGTGCTAGCAATCTGG	PRDM1	CAGCGCCAATGGGCTTTCGA	CGTCTCACACCG	GTTTCGAGACG	AGCCGCTTAAGAGCCTGTCG	CAGCGCCAATGGGCTTTCGACGTCTCACACCGCGGCTGTGCTAGCAATCTGGGTTTCGAGACGAGCCGCTTAAGAGCCTGTCG
38153	PRDM1_38153	TGAAATACACATGCGAAGAG	PRDM1	CAGCGCCAATGGGCTTTCGA	CGTCTCACACCG	GTTTCGAGACG	AGCCGCTTAAGAGCCTGTCG	CAGCGCCAATGGGCTTTCGACGTCTCACACCGTGAAATACACATGCGAAGAGGTTTCGAGACGAGCCGCTTAAGAGCCTGTCG
38236	PREX2_38236	AGACTTTACATGCTGGGGAG	PREX2	CAGCGCCAATGGGCTTTCGA	CGTCTCACACCG	GTTTCGAGACG	AGCCGCTTAAGAGCCTGTCG	CAGCGCCAATGGGCTTTCGACGTCTCACACCGAGACTTTACATGCTGGGGAGGTTTCGAGACGAGCCGCTTAAGAGCCTGTCG
38237	PREX2_38237	TGCCGCCTCCGCCAACTCCG	PREX2	CAGCGCCAATGGGCTTTCGA	CGTCTCACACCG	GTTTCGAGACG	AGCCGCTTAAGAGCCTGTCG	CAGCGCCAATGGGCTTTCGACGTCTCACACCGTGCCGCCTCCGCCAACTCCGGTTTCGAGACGAGCCGCTTAAGAGCCTGTCG
38546	PRPS2_38546	GGGGGAGCTGGAAAGTGCCG	PRPS2	CAGCGCCAATGGGCTTTCGA	CGTCTCACACCG	GTTTCGAGACG	AGCCGCTTAAGAGCCTGTCG	CAGCGCCAATGGGCTTTCGACGTCTCACACCGGGGGGAGCTGGAAAGTGCCGGTTTCGAGACGAGCCGCTTAAGAGCCTGTCG
38574	PRR16_38574	GGGACTGCAAGCGTCAACCC	PRR16	CAGCGCCAATGGGCTTTCGA	CGTCTCACACCG	GTTTCGAGACG	AGCCGCTTAAGAGCCTGTCG	CAGCGCCAATGGGCTTTCGACGTCTCACACCGGGGACTGCAAGCGTCAACCCGTTTCGAGACGAGCCGCTTAAGAGCCTGTCG
38576	PRR16_38576	TGCAAGCGTCAACCCTGGCG	PRR16	CAGCGCCAATGGGCTTTCGA	CGTCTCACACCG	GTTTCGAGACG	AGCCGCTTAAGAGCCTGTCG	CAGCGCCAATGGGCTTTCGACGTCTCACACCGTGCAAGCGTCAACCCTGGCGGTTTCGAGACGAGCCGCTTAAGAGCCTGTCG
38982	PSME2_38982	ACTGGCTGGGAATGGCTGAG	PSME2	CAGCGCCAATGGGCTTTCGA	CGTCTCACACCG	GTTTCGAGACG	AGCCGCTTAAGAGCCTGTCG	CAGCGCCAATGGGCTTTCGACGTCTCACACCGACTGGCTGGGAATGGCTGAGGTTTCGAGACGAGCCGCTTAAGAGCCTGTCG
38984	PSME2_38984	GAGGGGCTACCTACTGCTTG	PSME2	CAGCGCCAATGGGCTTTCGA	CGTCTCACACCG	GTTTCGAGACG	AGCCGCTTAAGAGCCTGTCG	CAGCGCCAATGGGCTTTCGACGTCTCACACCGGAGGGGCTACCTACTGCTTGGTTTCGAGACGAGCCGCTTAAGAGCCTGTCG
39209	PTPN12_39209	AGCTAGCTGTGTTCCTGAGG	PTPN12	CAGCGCCAATGGGCTTTCGA	CGTCTCACACCG	GTTTCGAGACG	AGCCGCTTAAGAGCCTGTCG	CAGCGCCAATGGGCTTTCGACGTCTCACACCGAGCTAGCTGTGTTCCTGAGGGTTTCGAGACGAGCCGCTTAAGAGCCTGTCG
39210	PTPN12_39210	CTGTGTTCCTGAGGCGGCGG	PTPN12	CAGCGCCAATGGGCTTTCGA	CGTCTCACACCG	GTTTCGAGACG	AGCCGCTTAAGAGCCTGTCG	CAGCGCCAATGGGCTTTCGACGTCTCACACCGCTGTGTTCCTGAGGCGGCGGGTTTCGAGACGAGCCGCTTAAGAGCCTGTCG
39216	PTPN14_39216	CACCCCAGAGCCGGGCTCCG	PTPN14	CAGCGCCAATGGGCTTTCGA	CGTCTCACACCG	GTTTCGAGACG	AGCCGCTTAAGAGCCTGTCG	CAGCGCCAATGGGCTTTCGACGTCTCACACCGCACCCCAGAGCCGGGCTCCGGTTTCGAGACGAGCCGCTTAAGAGCCTGTCG
39217	PTPN14_39217	TCCGTCCCCTCCCACTCGCA	PTPN14	CAGCGCCAATGGGCTTTCGA	CGTCTCACACCG	GTTTCGAGACG	AGCCGCTTAAGAGCCTGTCG	CAGCGCCAATGGGCTTTCGACGTCTCACACCGTCCGTCCCCTCCCACTCGCAGTTTCGAGACGAGCCGCTTAAGAGCCTGTCG
39261	PTPRC_39261	CTTCTCCAAAAATACTGTAA	PTPRC	CAGCGCCAATGGGCTTTCGA	CGTCTCACACCG	GTTTCGAGACG	AGCCGCTTAAGAGCCTGTCG	CAGCGCCAATGGGCTTTCGACGTCTCACACCGCTTCTCCAAAAATACTGTAAGTTTCGAGACGAGCCGCTTAAGAGCCTGTCG
39281	PTPRJ_39281	GAGGGGATCCGCGGCCGGCT	PTPRJ	CAGCGCCAATGGGCTTTCGA	CGTCTCACACCG	GTTTCGAGACG	AGCCGCTTAAGAGCCTGTCG	CAGCGCCAATGGGCTTTCGACGTCTCACACCGGAGGGGATCCGCGGCCGGCTGTTTCGAGACGAGCCGCTTAAGAGCCTGTCG
40004	RAPGEF2_40004	TGTACGTCAGAACTACCCAG	RAPGEF2	CAGCGCCAATGGGCTTTCGA	CGTCTCACACCG	GTTTCGAGACG	AGCCGCTTAAGAGCCTGTCG	CAGCGCCAATGGGCTTTCGACGTCTCACACCGTGTACGTCAGAACTACCCAGGTTTCGAGACGAGCCGCTTAAGAGCCTGTCG
40058	RASA3_40058	GCGGAGACCCGGGGGGCGCA	RASA3	CAGCGCCAATGGGCTTTCGA	CGTCTCACACCG	GTTTCGAGACG	AGCCGCTTAAGAGCCTGTCG	CAGCGCCAATGGGCTTTCGACGTCTCACACCGGCGGAGACCCGGGGGGCGCAGTTTCGAGACGAGCCGCTTAAGAGCCTGTCG
40089	RASGEF1C_40089	CGGAGGCCTGAACGCAGGGC	RASGEF1C	CAGCGCCAATGGGCTTTCGA	CGTCTCACACCG	GTTTCGAGACG	AGCCGCTTAAGAGCCTGTCG	CAGCGCCAATGGGCTTTCGACGTCTCACACCGCGGAGGCCTGAACGCAGGGCGTTTCGAGACGAGCCGCTTAAGAGCCTGTCG
40332	RBMS1_40332	CCGAGCCCGGGACCCGCTGG	RBMS1	CAGCGCCAATGGGCTTTCGA	CGTCTCACACCG	GTTTCGAGACG	AGCCGCTTAAGAGCCTGTCG	CAGCGCCAATGGGCTTTCGACGTCTCACACCGCCGAGCCCGGGACCCGCTGGGTTTCGAGACGAGCCGCTTAAGAGCCTGTCG
40749	RGL1_40749	GTGTGCTCACAAGCACAAAC	RGL1	CAGCGCCAATGGGCTTTCGA	CGTCTCACACCG	GTTTCGAGACG	AGCCGCTTAAGAGCCTGTCG	CAGCGCCAATGGGCTTTCGACGTCTCACACCGGTGTGCTCACAAGCACAAACGTTTCGAGACGAGCCGCTTAAGAGCCTGTCG
41028	RIMKLA_41028	GGCTGCAGAAGCGACCCTGG	RIMKLA	CAGCGCCAATGGGCTTTCGA	CGTCTCACACCG	GTTTCGAGACG	AGCCGCTTAAGAGCCTGTCG	CAGCGCCAATGGGCTTTCGACGTCTCACACCGGGCTGCAGAAGCGACCCTGGGTTTCGAGACGAGCCGCTTAAGAGCCTGTCG
41029	RIMKLA_41029	TTCCCCGGCACCGCCCGCCA	RIMKLA	CAGCGCCAATGGGCTTTCGA	CGTCTCACACCG	GTTTCGAGACG	AGCCGCTTAAGAGCCTGTCG	CAGCGCCAATGGGCTTTCGACGTCTCACACCGTTCCCCGGCACCGCCCGCCAGTTTCGAGACGAGCCGCTTAAGAGCCTGTCG
41375	RNF19B_41375	ACTCCTAGACCGGGGCGCAA	RNF19B	CAGCGCCAATGGGCTTTCGA	CGTCTCACACCG	GTTTCGAGACG	AGCCGCTTAAGAGCCTGTCG	CAGCGCCAATGGGCTTTCGACGTCTCACACCGACTCCTAGACCGGGGCGCAAGTTTCGAGACGAGCCGCTTAAGAGCCTGTCG
42044	RRP1B_42044	TGGCAACCGAAAGGCAGCGC	RRP1B	CAGCGCCAATGGGCTTTCGA	CGTCTCACACCG	GTTTCGAGACG	AGCCGCTTAAGAGCCTGTCG	CAGCGCCAATGGGCTTTCGACGTCTCACACCGTGGCAACCGAAAGGCAGCGCGTTTCGAGACGAGCCGCTTAAGAGCCTGTCG
42584	SATB2_42584	CCGGGAAAAGTTGCTCGGAG	SATB2	CAGCGCCAATGGGCTTTCGA	CGTCTCACACCG	GTTTCGAGACG	AGCCGCTTAAGAGCCTGTCG	CAGCGCCAATGGGCTTTCGACGTCTCACACCGCCGGGAAAAGTTGCTCGGAGGTTTCGAGACGAGCCGCTTAAGAGCCTGTCG
43193	SEMA6A_43193	TCCGACCCAAAGGAGAGCTG	SEMA6A	CAGCGCCAATGGGCTTTCGA	CGTCTCACACCG	GTTTCGAGACG	AGCCGCTTAAGAGCCTGTCG	CAGCGCCAATGGGCTTTCGACGTCTCACACCGTCCGACCCAAAGGAGAGCTGGTTTCGAGACGAGCCGCTTAAGAGCCTGTCG
43390	SERTAD2_43390	CCCGGCCCGCCTCTCCCCGG	SERTAD2	CAGCGCCAATGGGCTTTCGA	CGTCTCACACCG	GTTTCGAGACG	AGCCGCTTAAGAGCCTGTCG	CAGCGCCAATGGGCTTTCGACGTCTCACACCGCCCGGCCCGCCTCTCCCCGGGTTTCGAGACGAGCCGCTTAAGAGCCTGTCG
44020	SIX1_44020	AGAGGCCGCACCGCCCAGAG	SIX1	CAGCGCCAATGGGCTTTCGA	CGTCTCACACCG	GTTTCGAGACG	AGCCGCTTAAGAGCCTGTCG	CAGCGCCAATGGGCTTTCGACGTCTCACACCGAGAGGCCGCACCGCCCAGAGGTTTCGAGACGAGCCGCTTAAGAGCCTGTCG
44977	SLC4A1_44977	TCTGTTTACTGGGCACCCAG	SLC4A1	CAGCGCCAATGGGCTTTCGA	CGTCTCACACCG	GTTTCGAGACG	AGCCGCTTAAGAGCCTGTCG	CAGCGCCAATGGGCTTTCGACGTCTCACACCGTCTGTTTACTGGGCACCCAGGTTTCGAGACGAGCCGCTTAAGAGCCTGTCG
45892	SOCS3_45892	CAGAGAAAGGCTGAGCGCGG	SOCS3	CAGCGCCAATGGGCTTTCGA	CGTCTCACACCG	GTTTCGAGACG	AGCCGCTTAAGAGCCTGTCG	CAGCGCCAATGGGCTTTCGACGTCTCACACCGCAGAGAAAGGCTGAGCGCGGGTTTCGAGACGAGCCGCTTAAGAGCCTGTCG
45893	SOCS3_45893	CAGCAGAGAAAGGCTGAGCG	SOCS3	CAGCGCCAATGGGCTTTCGA	CGTCTCACACCG	GTTTCGAGACG	AGCCGCTTAAGAGCCTGTCG	CAGCGCCAATGGGCTTTCGACGTCTCACACCGCAGCAGAGAAAGGCTGAGCGGTTTCGAGACGAGCCGCTTAAGAGCCTGTCG
45957	SOS1_45957	AGACAGGGAGGGCGCCCGGC	SOS1	CAGCGCCAATGGGCTTTCGA	CGTCTCACACCG	GTTTCGAGACG	AGCCGCTTAAGAGCCTGTCG	CAGCGCCAATGGGCTTTCGACGTCTCACACCGAGACAGGGAGGGCGCCCGGCGTTTCGAGACGAGCCGCTTAAGAGCCTGTCG
45986	SOX10_45986	TGGAGGAGCCCTGAGTGTTG	SOX10	CAGCGCCAATGGGCTTTCGA	CGTCTCACACCG	GTTTCGAGACG	AGCCGCTTAAGAGCCTGTCG	CAGCGCCAATGGGCTTTCGACGTCTCACACCGTGGAGGAGCCCTGAGTGTTGGTTTCGAGACGAGCCGCTTAAGAGCCTGTCG
46036	SOX9_46036	CACTGGGCTGGGTGACGAGG	SOX9	CAGCGCCAATGGGCTTTCGA	CGTCTCACACCG	GTTTCGAGACG	AGCCGCTTAAGAGCCTGTCG	CAGCGCCAATGGGCTTTCGACGTCTCACACCGCACTGGGCTGGGTGACGAGGGTTTCGAGACGAGCCGCTTAAGAGCCTGTCG
46071	SP8_46071	CACTCCCCCTTCCACCACGG	SP8	CAGCGCCAATGGGCTTTCGA	CGTCTCACACCG	GTTTCGAGACG	AGCCGCTTAAGAGCCTGTCG	CAGCGCCAATGGGCTTTCGACGTCTCACACCGCACTCCCCCTTCCACCACGGGTTTCGAGACGAGCCGCTTAAGAGCCTGTCG
46073	SP8_46073	TCCCACTCCCCCTTCCACCA	SP8	CAGCGCCAATGGGCTTTCGA	CGTCTCACACCG	GTTTCGAGACG	AGCCGCTTAAGAGCCTGTCG	CAGCGCCAATGGGCTTTCGACGTCTCACACCGTCCCACTCCCCCTTCCACCAGTTTCGAGACGAGCCGCTTAAGAGCCTGTCG
46574	SPRY2_46574	CTGCGCCCTCGCCTTTCCGG	SPRY2	CAGCGCCAATGGGCTTTCGA	CGTCTCACACCG	GTTTCGAGACG	AGCCGCTTAAGAGCCTGTCG	CAGCGCCAATGGGCTTTCGACGTCTCACACCGCTGCGCCCTCGCCTTTCCGGGTTTCGAGACGAGCCGCTTAAGAGCCTGTCG
46575	SPRY2_46575	GCTCCCTGCCTCCTCCGGAA	SPRY2	CAGCGCCAATGGGCTTTCGA	CGTCTCACACCG	GTTTCGAGACG	AGCCGCTTAAGAGCCTGTCG	CAGCGCCAATGGGCTTTCGACGTCTCACACCGGCTCCCTGCCTCCTCCGGAAGTTTCGAGACGAGCCGCTTAAGAGCCTGTCG
46798	SRSF2_46798	GCGGCAGGGTCGTTACGAAG	SRSF2	CAGCGCCAATGGGCTTTCGA	CGTCTCACACCG	GTTTCGAGACG	AGCCGCTTAAGAGCCTGTCG	CAGCGCCAATGGGCTTTCGACGTCTCACACCGGCGGCAGGGTCGTTACGAAGGTTTCGAGACGAGCCGCTTAAGAGCCTGTCG
46799	SRSF2_46799	GGCAGGGTCGTTACGAAGCG	SRSF2	CAGCGCCAATGGGCTTTCGA	CGTCTCACACCG	GTTTCGAGACG	AGCCGCTTAAGAGCCTGTCG	CAGCGCCAATGGGCTTTCGACGTCTCACACCGGGCAGGGTCGTTACGAAGCGGTTTCGAGACGAGCCGCTTAAGAGCCTGTCG
46821	SRSF9_46821	GCAGCCGCGTTCTCTTTAAG	SRSF9	CAGCGCCAATGGGCTTTCGA	CGTCTCACACCG	GTTTCGAGACG	AGCCGCTTAAGAGCCTGTCG	CAGCGCCAATGGGCTTTCGACGTCTCACACCGGCAGCCGCGTTCTCTTTAAGGTTTCGAGACGAGCCGCTTAAGAGCCTGTCG
47942	TAF15_47942	GTACTAGCCGCCGAGCCCTG	TAF15	CAGCGCCAATGGGCTTTCGA	CGTCTCACACCG	GTTTCGAGACG	AGCCGCTTAAGAGCCTGTCG	CAGCGCCAATGGGCTTTCGACGTCTCACACCGGTACTAGCCGCCGAGCCCTGGTTTCGAGACGAGCCGCTTAAGAGCCTGTCG
48465	TCF12_48465	GCTCCGCCGCCTAGGAAGTG	TCF12	CAGCGCCAATGGGCTTTCGA	CGTCTCACACCG	GTTTCGAGACG	AGCCGCTTAAGAGCCTGTCG	CAGCGCCAATGGGCTTTCGACGTCTCACACCGGCTCCGCCGCCTAGGAAGTGGTTTCGAGACGAGCCGCTTAAGAGCCTGTCG
48497	TCF7L1_48497	GCAGCTCTCCGGGTTCCGCG	TCF7L1	CAGCGCCAATGGGCTTTCGA	CGTCTCACACCG	GTTTCGAGACG	AGCCGCTTAAGAGCCTGTCG	CAGCGCCAATGGGCTTTCGACGTCTCACACCGGCAGCTCTCCGGGTTCCGCGGTTTCGAGACGAGCCGCTTAAGAGCCTGTCG
50536	TNFSF10_50536	CCTGGGCAGTAGGAAAGGGG	TNFSF10	CAGCGCCAATGGGCTTTCGA	CGTCTCACACCG	GTTTCGAGACG	AGCCGCTTAAGAGCCTGTCG	CAGCGCCAATGGGCTTTCGACGTCTCACACCGCCTGGGCAGTAGGAAAGGGGGTTTCGAGACGAGCCGCTTAAGAGCCTGTCG
50675	TOB1_50675	GCCGCCGGAGCTGTGTGACG	TOB1	CAGCGCCAATGGGCTTTCGA	CGTCTCACACCG	GTTTCGAGACG	AGCCGCTTAAGAGCCTGTCG	CAGCGCCAATGGGCTTTCGACGTCTCACACCGGCCGCCGGAGCTGTGTGACGGTTTCGAGACGAGCCGCTTAAGAGCCTGTCG
50676	TOB1_50676	TCCGCGTCACACAGCTCCGG	TOB1	CAGCGCCAATGGGCTTTCGA	CGTCTCACACCG	GTTTCGAGACG	AGCCGCTTAAGAGCCTGTCG	CAGCGCCAATGGGCTTTCGACGTCTCACACCGTCCGCGTCACACAGCTCCGGGTTTCGAGACGAGCCGCTTAAGAGCCTGTCG
50886	TPM3_50886	CGTACTCCAGGGCGACTGGG	TPM3	CAGCGCCAATGGGCTTTCGA	CGTCTCACACCG	GTTTCGAGACG	AGCCGCTTAAGAGCCTGTCG	CAGCGCCAATGGGCTTTCGACGTCTCACACCGCGTACTCCAGGGCGACTGGGGTTTCGAGACGAGCCGCTTAAGAGCCTGTCG
51177	TRIM25_51177	AGTCGCCCATGAGCTGGCGA	TRIM25	CAGCGCCAATGGGCTTTCGA	CGTCTCACACCG	GTTTCGAGACG	AGCCGCTTAAGAGCCTGTCG	CAGCGCCAATGGGCTTTCGACGTCTCACACCGAGTCGCCCATGAGCTGGCGAGTTTCGAGACGAGCCGCTTAAGAGCCTGTCG
51203	TRIM33_51203	TACGCACGGACGTCCTCCCG	TRIM33	CAGCGCCAATGGGCTTTCGA	CGTCTCACACCG	GTTTCGAGACG	AGCCGCTTAAGAGCCTGTCG	CAGCGCCAATGGGCTTTCGACGTCTCACACCGTACGCACGGACGTCCTCCCGGTTTCGAGACGAGCCGCTTAAGAGCCTGTCG
51495	TRPM3_51495	TTCAAGTAAGCAATGAACTT	TRPM3	CAGCGCCAATGGGCTTTCGA	CGTCTCACACCG	GTTTCGAGACG	AGCCGCTTAAGAGCCTGTCG	CAGCGCCAATGGGCTTTCGACGTCTCACACCGTTCAAGTAAGCAATGAACTTGTTTCGAGACGAGCCGCTTAAGAGCCTGTCG
51558	TSC22D3_51558	TCCCAGCCTAAGGTTCAGGG	TSC22D3	CAGCGCCAATGGGCTTTCGA	CGTCTCACACCG	GTTTCGAGACG	AGCCGCTTAAGAGCCTGTCG	CAGCGCCAATGGGCTTTCGACGTCTCACACCGTCCCAGCCTAAGGTTCAGGGGTTTCGAGACGAGCCGCTTAAGAGCCTGTCG
52278	UBALD2_52278	TTACGGGAGCCGGGCGCTGG	UBALD2	CAGCGCCAATGGGCTTTCGA	CGTCTCACACCG	GTTTCGAGACG	AGCCGCTTAAGAGCCTGTCG	CAGCGCCAATGGGCTTTCGACGTCTCACACCGTTACGGGAGCCGGGCGCTGGGTTTCGAGACGAGCCGCTTAAGAGCCTGTCG
52500	UBTF_52500	TGACGGGCAAGCGCTCGGAG	UBTF	CAGCGCCAATGGGCTTTCGA	CGTCTCACACCG	GTTTCGAGACG	AGCCGCTTAAGAGCCTGTCG	CAGCGCCAATGGGCTTTCGACGTCTCACACCGTGACGGGCAAGCGCTCGGAGGTTTCGAGACGAGCCGCTTAAGAGCCTGTCG
53332	VGLL2_53332	GCGAGGGACGCTTGTTGGAG	VGLL2	CAGCGCCAATGGGCTTTCGA	CGTCTCACACCG	GTTTCGAGACG	AGCCGCTTAAGAGCCTGTCG	CAGCGCCAATGGGCTTTCGACGTCTCACACCGGCGAGGGACGCTTGTTGGAGGTTTCGAGACGAGCCGCTTAAGAGCCTGTCG
53333	VGLL2_53333	GGGGGGCCAATGGGGAGCGA	VGLL2	CAGCGCCAATGGGCTTTCGA	CGTCTCACACCG	GTTTCGAGACG	AGCCGCTTAAGAGCCTGTCG	CAGCGCCAATGGGCTTTCGACGTCTCACACCGGGGGGGCCAATGGGGAGCGAGTTTCGAGACGAGCCGCTTAAGAGCCTGTCG
53692	WBP4_53692	CGGTACTCCCGGCTCCAAAG	WBP4	CAGCGCCAATGGGCTTTCGA	CGTCTCACACCG	GTTTCGAGACG	AGCCGCTTAAGAGCCTGTCG	CAGCGCCAATGGGCTTTCGACGTCTCACACCGCGGTACTCCCGGCTCCAAAGGTTTCGAGACGAGCCGCTTAAGAGCCTGTCG
54139	WWTR1_54139	CTGGCCGGCTAGGGACTAGG	WWTR1	CAGCGCCAATGGGCTTTCGA	CGTCTCACACCG	GTTTCGAGACG	AGCCGCTTAAGAGCCTGTCG	CAGCGCCAATGGGCTTTCGACGTCTCACACCGCTGGCCGGCTAGGGACTAGGGTTTCGAGACGAGCCGCTTAAGAGCCTGTCG
54476	ZBP1_54476	CGAATCTGGCCGGCCTGGCT	ZBP1	CAGCGCCAATGGGCTTTCGA	CGTCTCACACCG	GTTTCGAGACG	AGCCGCTTAAGAGCCTGTCG	CAGCGCCAATGGGCTTTCGACGTCTCACACCGCGAATCTGGCCGGCCTGGCTGTTTCGAGACGAGCCGCTTAAGAGCCTGTCG
54477	ZBP1_54477	CTCCTGAAACCGAATCTGGC	ZBP1	CAGCGCCAATGGGCTTTCGA	CGTCTCACACCG	GTTTCGAGACG	AGCCGCTTAAGAGCCTGTCG	CAGCGCCAATGGGCTTTCGACGTCTCACACCGCTCCTGAAACCGAATCTGGCGTTTCGAGACGAGCCGCTTAAGAGCCTGTCG
54661	ZC3HAV1_54661	ACCAACAGAGGCAGAGCGCA	ZC3HAV1	CAGCGCCAATGGGCTTTCGA	CGTCTCACACCG	GTTTCGAGACG	AGCCGCTTAAGAGCCTGTCG	CAGCGCCAATGGGCTTTCGACGTCTCACACCGACCAACAGAGGCAGAGCGCAGTTTCGAGACGAGCCGCTTAAGAGCCTGTCG
54914	ZFPM2_54914	GGCTGCATCCAAATCCAGTC	ZFPM2	CAGCGCCAATGGGCTTTCGA	CGTCTCACACCG	GTTTCGAGACG	AGCCGCTTAAGAGCCTGTCG	CAGCGCCAATGGGCTTTCGACGTCTCACACCGGGCTGCATCCAAATCCAGTCGTTTCGAGACGAGCCGCTTAAGAGCCTGTCG
55372	ZNF28_55372	GAGACTCACAGGTCCCGCTC	ZNF28	CAGCGCCAATGGGCTTTCGA	CGTCTCACACCG	GTTTCGAGACG	AGCCGCTTAAGAGCCTGTCG	CAGCGCCAATGGGCTTTCGACGTCTCACACCGGAGACTCACAGGTCCCGCTCGTTTCGAGACGAGCCGCTTAAGAGCCTGTCG
55771	ZNF503_55771	AAAACCGGCACTGAGAGTCC	ZNF503	CAGCGCCAATGGGCTTTCGA	CGTCTCACACCG	GTTTCGAGACG	AGCCGCTTAAGAGCCTGTCG	CAGCGCCAATGGGCTTTCGACGTCTCACACCGAAAACCGGCACTGAGAGTCCGTTTCGAGACGAGCCGCTTAAGAGCCTGTCG
57507	FAS_FAS_745	CGGTTTACGAGTGACTTGGC	FAS	CAGCGCCAATGGGCTTTCGA	CGTCTCACACCG	GTTTCGAGACG	AGCCGCTTAAGAGCCTGTCG	CAGCGCCAATGGGCTTTCGACGTCTCACACCGCGGTTTACGAGTGACTTGGCGTTTCGAGACGAGCCGCTTAAGAGCCTGTCG
57509	FASLG_FASLG_747	AGAGGTGTTTCCCTTAGCTA	FASLG	CAGCGCCAATGGGCTTTCGA	CGTCTCACACCG	GTTTCGAGACG	AGCCGCTTAAGAGCCTGTCG	CAGCGCCAATGGGCTTTCGACGTCTCACACCGAGAGGTGTTTCCCTTAGCTAGTTTCGAGACGAGCCGCTTAAGAGCCTGTCG
57961	CCND1_CCND1_1199	AGAGAATGGGAGCGGGAGGG	CCND1	CAGCGCCAATGGGCTTTCGA	CGTCTCACACCG	GTTTCGAGACG	AGCCGCTTAAGAGCCTGTCG	CAGCGCCAATGGGCTTTCGACGTCTCACACCGAGAGAATGGGAGCGGGAGGGGTTTCGAGACGAGCCGCTTAAGAGCCTGTCG
58281	MYRF_MYRF_1519	GAGCGCCGCCTGCAGGAGTC	MYRF	CAGCGCCAATGGGCTTTCGA	CGTCTCACACCG	GTTTCGAGACG	AGCCGCTTAAGAGCCTGTCG	CAGCGCCAATGGGCTTTCGACGTCTCACACCGGAGCGCCGCCTGCAGGAGTCGTTTCGAGACGAGCCGCTTAAGAGCCTGTCG
58488	CASP1_CASP1_1726	TACAGTTCTGATTCTTTAAT	CASP1	CAGCGCCAATGGGCTTTCGA	CGTCTCACACCG	GTTTCGAGACG	AGCCGCTTAAGAGCCTGTCG	CAGCGCCAATGGGCTTTCGACGTCTCACACCGTACAGTTCTGATTCTTTAATGTTTCGAGACGAGCCGCTTAAGAGCCTGTCG
58510	CASP8_CASP8_1748	GCAGCTTTAGAAGCTTTAGA	CASP8	CAGCGCCAATGGGCTTTCGA	CGTCTCACACCG	GTTTCGAGACG	AGCCGCTTAAGAGCCTGTCG	CAGCGCCAATGGGCTTTCGACGTCTCACACCGGCAGCTTTAGAAGCTTTAGAGTTTCGAGACGAGCCGCTTAAGAGCCTGTCG
58538	RUNX2_RUNX2_1776	ACAGTACTCTTAAGTAAAGT	RUNX2	CAGCGCCAATGGGCTTTCGA	CGTCTCACACCG	GTTTCGAGACG	AGCCGCTTAAGAGCCTGTCG	CAGCGCCAATGGGCTTTCGACGTCTCACACCGACAGTACTCTTAAGTAAAGTGTTTCGAGACGAGCCGCTTAAGAGCCTGTCG
58540	RUNX2_RUNX2_1778	GGGGGAAAAGCCACAGTGGT	RUNX2	CAGCGCCAATGGGCTTTCGA	CGTCTCACACCG	GTTTCGAGACG	AGCCGCTTAAGAGCCTGTCG	CAGCGCCAATGGGCTTTCGACGTCTCACACCGGGGGGAAAAGCCACAGTGGTGTTTCGAGACGAGCCGCTTAAGAGCCTGTCG
58989	CEBPA_CEBPA_2227	CCTCTGTCCCCGGGCTGCGG	CEBPA	CAGCGCCAATGGGCTTTCGA	CGTCTCACACCG	GTTTCGAGACG	AGCCGCTTAAGAGCCTGTCG	CAGCGCCAATGGGCTTTCGACGTCTCACACCGCCTCTGTCCCCGGGCTGCGGGTTTCGAGACGAGCCGCTTAAGAGCCTGTCG
58991	CEBPA_CEBPA_2229	GCTGGGTCCTAGCGCGCGGC	CEBPA	CAGCGCCAATGGGCTTTCGA	CGTCTCACACCG	GTTTCGAGACG	AGCCGCTTAAGAGCCTGTCG	CAGCGCCAATGGGCTTTCGACGTCTCACACCGGCTGGGTCCTAGCGCGCGGCGTTTCGAGACGAGCCGCTTAAGAGCCTGTCG
58993	CEBPB_CEBPB_2231	GTCCTCCCGGGGGTCTCGGG	CEBPB	CAGCGCCAATGGGCTTTCGA	CGTCTCACACCG	GTTTCGAGACG	AGCCGCTTAAGAGCCTGTCG	CAGCGCCAATGGGCTTTCGACGTCTCACACCGGTCCTCCCGGGGGTCTCGGGGTTTCGAGACGAGCCGCTTAAGAGCCTGTCG
60502	ARID3A_ARID3A_3740	ACCAGGGGACGAGTCGCTCT	ARID3A	CAGCGCCAATGGGCTTTCGA	CGTCTCACACCG	GTTTCGAGACG	AGCCGCTTAAGAGCCTGTCG	CAGCGCCAATGGGCTTTCGACGTCTCACACCGACCAGGGGACGAGTCGCTCTGTTTCGAGACGAGCCGCTTAAGAGCCTGTCG
60537	TSC22D3_TSC22D3_3775	CTGTTTACAGTCCCAGCCTA	TSC22D3	CAGCGCCAATGGGCTTTCGA	CGTCTCACACCG	GTTTCGAGACG	AGCCGCTTAAGAGCCTGTCG	CAGCGCCAATGGGCTTTCGACGTCTCACACCGCTGTTTACAGTCCCAGCCTAGTTTCGAGACGAGCCGCTTAAGAGCCTGTCG
60753	EGFR_EGFR_3991	GGAGGAGAATGCGAGGAGGA	EGFR	CAGCGCCAATGGGCTTTCGA	CGTCTCACACCG	GTTTCGAGACG	AGCCGCTTAAGAGCCTGTCG	CAGCGCCAATGGGCTTTCGACGTCTCACACCGGGAGGAGAATGCGAGGAGGAGTTTCGAGACGAGCCGCTTAAGAGCCTGTCG
60760	EGR3_EGR3_3998	AACATTAGAAAGCAGGAAGC	EGR3	CAGCGCCAATGGGCTTTCGA	CGTCTCACACCG	GTTTCGAGACG	AGCCGCTTAAGAGCCTGTCG	CAGCGCCAATGGGCTTTCGACGTCTCACACCGAACATTAGAAAGCAGGAAGCGTTTCGAGACGAGCCGCTTAAGAGCCTGTCG
61011	ERBB3_ERBB3_4249	CTCCCGCGCGAGGCTGGAGT	ERBB3	CAGCGCCAATGGGCTTTCGA	CGTCTCACACCG	GTTTCGAGACG	AGCCGCTTAAGAGCCTGTCG	CAGCGCCAATGGGCTTTCGACGTCTCACACCGCTCCCGCGCGAGGCTGGAGTGTTTCGAGACGAGCCGCTTAAGAGCCTGTCG
61027	EYA4_EYA4_4265	GCGGGCTCGTGAGGCCGCCG	EYA4	CAGCGCCAATGGGCTTTCGA	CGTCTCACACCG	GTTTCGAGACG	AGCCGCTTAAGAGCCTGTCG	CAGCGCCAATGGGCTTTCGACGTCTCACACCGGCGGGCTCGTGAGGCCGCCGGTTTCGAGACGAGCCGCTTAAGAGCCTGTCG
61091	ETV1_ETV1_4329	GCGAGGGAGACCCGCGGGAA	ETV1	CAGCGCCAATGGGCTTTCGA	CGTCTCACACCG	GTTTCGAGACG	AGCCGCTTAAGAGCCTGTCG	CAGCGCCAATGGGCTTTCGACGTCTCACACCGGCGAGGGAGACCCGCGGGAAGTTTCGAGACGAGCCGCTTAAGAGCCTGTCG
61401	FGF9_FGF9_4639	GCCAGAGCGCAGGACTTCCT	FGF9	CAGCGCCAATGGGCTTTCGA	CGTCTCACACCG	GTTTCGAGACG	AGCCGCTTAAGAGCCTGTCG	CAGCGCCAATGGGCTTTCGACGTCTCACACCGGCCAGAGCGCAGGACTTCCTGTTTCGAGACGAGCCGCTTAAGAGCCTGTCG
61402	FGF9_FGF9_4640	TCGCCTGCCGCAGAGCGGCG	FGF9	CAGCGCCAATGGGCTTTCGA	CGTCTCACACCG	GTTTCGAGACG	AGCCGCTTAAGAGCCTGTCG	CAGCGCCAATGGGCTTTCGACGTCTCACACCGTCGCCTGCCGCAGAGCGGCGGTTTCGAGACGAGCCGCTTAAGAGCCTGTCG
61483	FOXF1_FOXF1_4721	GGCTGCACCTCTGCCGTCAT	FOXF1	CAGCGCCAATGGGCTTTCGA	CGTCTCACACCG	GTTTCGAGACG	AGCCGCTTAAGAGCCTGTCG	CAGCGCCAATGGGCTTTCGACGTCTCACACCGGGCTGCACCTCTGCCGTCATGTTTCGAGACGAGCCGCTTAAGAGCCTGTCG
61490	FOXD1_FOXD1_4728	GAGAAAATTCACCCGTAGGA	FOXD1	CAGCGCCAATGGGCTTTCGA	CGTCTCACACCG	GTTTCGAGACG	AGCCGCTTAAGAGCCTGTCG	CAGCGCCAATGGGCTTTCGACGTCTCACACCGGAGAAAATTCACCCGTAGGAGTTTCGAGACGAGCCGCTTAAGAGCCTGTCG
61491	FOXD1_FOXD1_4729	GTCAGAGCGCTGCCGAGGGA	FOXD1	CAGCGCCAATGGGCTTTCGA	CGTCTCACACCG	GTTTCGAGACG	AGCCGCTTAAGAGCCTGTCG	CAGCGCCAATGGGCTTTCGACGTCTCACACCGGTCAGAGCGCTGCCGAGGGAGTTTCGAGACGAGCCGCTTAAGAGCCTGTCG
61915	GBX2_GBX2_5153	TGGCGCCCGCAGCCCGCTCG	GBX2	CAGCGCCAATGGGCTTTCGA	CGTCTCACACCG	GTTTCGAGACG	AGCCGCTTAAGAGCCTGTCG	CAGCGCCAATGGGCTTTCGACGTCTCACACCGTGGCGCCCGCAGCCCGCTCGGTTTCGAGACGAGCCGCTTAAGAGCCTGTCG
62926	HINT1_HINT1_6164	GACCAGGAACTTCCCCAAGC	HINT1	CAGCGCCAATGGGCTTTCGA	CGTCTCACACCG	GTTTCGAGACG	AGCCGCTTAAGAGCCTGTCG	CAGCGCCAATGGGCTTTCGACGTCTCACACCGGACCAGGAACTTCCCCAAGCGTTTCGAGACGAGCCGCTTAAGAGCCTGTCG
63129	HNRNPU_HNRNPU_6367	CGCTGACGGGAGCACTGCGC	HNRNPU	CAGCGCCAATGGGCTTTCGA	CGTCTCACACCG	GTTTCGAGACG	AGCCGCTTAAGAGCCTGTCG	CAGCGCCAATGGGCTTTCGACGTCTCACACCGCGCTGACGGGAGCACTGCGCGTTTCGAGACGAGCCGCTTAAGAGCCTGTCG
63130	HNRNPU_HNRNPU_6368	GCACTGCGCAGGAGGAAAGC	HNRNPU	CAGCGCCAATGGGCTTTCGA	CGTCTCACACCG	GTTTCGAGACG	AGCCGCTTAAGAGCCTGTCG	CAGCGCCAATGGGCTTTCGACGTCTCACACCGGCACTGCGCAGGAGGAAAGCGTTTCGAGACGAGCCGCTTAAGAGCCTGTCG
63453	HTR7_HTR7_6691	CGGCTGCCGCAGGGGAGCGG	HTR7	CAGCGCCAATGGGCTTTCGA	CGTCTCACACCG	GTTTCGAGACG	AGCCGCTTAAGAGCCTGTCG	CAGCGCCAATGGGCTTTCGACGTCTCACACCGCGGCTGCCGCAGGGGAGCGGGTTTCGAGACGAGCCGCTTAAGAGCCTGTCG
63501	ID3_ID3_6739	AGCCTGTTTGCAATTTAAGC	ID3	CAGCGCCAATGGGCTTTCGA	CGTCTCACACCG	GTTTCGAGACG	AGCCGCTTAAGAGCCTGTCG	CAGCGCCAATGGGCTTTCGACGTCTCACACCGAGCCTGTTTGCAATTTAAGCGTTTCGAGACGAGCCGCTTAAGAGCCTGTCG
63502	ID3_ID3_6740	GCAAACAGGCTTCCTCCGGC	ID3	CAGCGCCAATGGGCTTTCGA	CGTCTCACACCG	GTTTCGAGACG	AGCCGCTTAAGAGCCTGTCG	CAGCGCCAATGGGCTTTCGACGTCTCACACCGGCAAACAGGCTTCCTCCGGCGTTTCGAGACGAGCCGCTTAAGAGCCTGTCG
63965	ITGA3_ITGA3_7203	AGGAAAGCGCAGCCCGGGCT	ITGA3	CAGCGCCAATGGGCTTTCGA	CGTCTCACACCG	GTTTCGAGACG	AGCCGCTTAAGAGCCTGTCG	CAGCGCCAATGGGCTTTCGACGTCTCACACCGAGGAAAGCGCAGCCCGGGCTGTTTCGAGACGAGCCGCTTAAGAGCCTGTCG
63967	ITGA3_ITGA3_7205	GCTGGGCTCGCAAGGTGGGG	ITGA3	CAGCGCCAATGGGCTTTCGA	CGTCTCACACCG	GTTTCGAGACG	AGCCGCTTAAGAGCCTGTCG	CAGCGCCAATGGGCTTTCGACGTCTCACACCGGCTGGGCTCGCAAGGTGGGGGTTTCGAGACGAGCCGCTTAAGAGCCTGTCG
63992	ITGAV_ITGAV_7230	CAGCTCCACAGCAGCCTCCC	ITGAV	CAGCGCCAATGGGCTTTCGA	CGTCTCACACCG	GTTTCGAGACG	AGCCGCTTAAGAGCCTGTCG	CAGCGCCAATGGGCTTTCGACGTCTCACACCGCAGCTCCACAGCAGCCTCCCGTTTCGAGACGAGCCGCTTAAGAGCCTGTCG
63994	ITGAV_ITGAV_7232	TCCACAGCAGCCTCCCGGGC	ITGAV	CAGCGCCAATGGGCTTTCGA	CGTCTCACACCG	GTTTCGAGACG	AGCCGCTTAAGAGCCTGTCG	CAGCGCCAATGGGCTTTCGACGTCTCACACCGTCCACAGCAGCCTCCCGGGCGTTTCGAGACGAGCCGCTTAAGAGCCTGTCG
64005	ITGB3_ITGB3_7243	GGGATCTAGAGAAGCCGGAG	ITGB3	CAGCGCCAATGGGCTTTCGA	CGTCTCACACCG	GTTTCGAGACG	AGCCGCTTAAGAGCCTGTCG	CAGCGCCAATGGGCTTTCGACGTCTCACACCGGGGATCTAGAGAAGCCGGAGGTTTCGAGACGAGCCGCTTAAGAGCCTGTCG
64006	ITGB3_ITGB3_7244	GGGGATCTAGAGAAGCCGGA	ITGB3	CAGCGCCAATGGGCTTTCGA	CGTCTCACACCG	GTTTCGAGACG	AGCCGCTTAAGAGCCTGTCG	CAGCGCCAATGGGCTTTCGACGTCTCACACCGGGGGATCTAGAGAAGCCGGAGTTTCGAGACGAGCCGCTTAAGAGCCTGTCG
64420	KRT16_KRT16_7658	GCTGGGTGGGAACTCTGAGC	KRT16	CAGCGCCAATGGGCTTTCGA	CGTCTCACACCG	GTTTCGAGACG	AGCCGCTTAAGAGCCTGTCG	CAGCGCCAATGGGCTTTCGACGTCTCACACCGGCTGGGTGGGAACTCTGAGCGTTTCGAGACGAGCCGCTTAAGAGCCTGTCG
65049	MCF2_MCF2_8287	CTAATCCACAAGGTTCAATC	MCF2	CAGCGCCAATGGGCTTTCGA	CGTCTCACACCG	GTTTCGAGACG	AGCCGCTTAAGAGCCTGTCG	CAGCGCCAATGGGCTTTCGACGTCTCACACCGCTAATCCACAAGGTTCAATCGTTTCGAGACGAGCCGCTTAAGAGCCTGTCG
65138	MAP3K3_MAP3K3_8376	GGTGGGTGGGGGTGGTGCGA	MAP3K3	CAGCGCCAATGGGCTTTCGA	CGTCTCACACCG	GTTTCGAGACG	AGCCGCTTAAGAGCCTGTCG	CAGCGCCAATGGGCTTTCGACGTCTCACACCGGGTGGGTGGGGGTGGTGCGAGTTTCGAGACGAGCCGCTTAAGAGCCTGTCG
65297	FOXO4_FOXO4_8535	CGGCCAGGAGCCCGATACGG	FOXO4	CAGCGCCAATGGGCTTTCGA	CGTCTCACACCG	GTTTCGAGACG	AGCCGCTTAAGAGCCTGTCG	CAGCGCCAATGGGCTTTCGACGTCTCACACCGCGGCCAGGAGCCCGATACGGGTTTCGAGACGAGCCGCTTAAGAGCCTGTCG
65298	FOXO4_FOXO4_8536	TCGCGGCCAGGAGCCCGATA	FOXO4	CAGCGCCAATGGGCTTTCGA	CGTCTCACACCG	GTTTCGAGACG	AGCCGCTTAAGAGCCTGTCG	CAGCGCCAATGGGCTTTCGACGTCTCACACCGTCGCGGCCAGGAGCCCGATAGTTTCGAGACGAGCCGCTTAAGAGCCTGTCG
65445	MSI1_MSI1_8683	GCGAGCCCGGGCGCCCGCGG	MSI1	CAGCGCCAATGGGCTTTCGA	CGTCTCACACCG	GTTTCGAGACG	AGCCGCTTAAGAGCCTGTCG	CAGCGCCAATGGGCTTTCGACGTCTCACACCGGCGAGCCCGGGCGCCCGCGGGTTTCGAGACGAGCCGCTTAAGAGCCTGTCG
65593	MXI1_MXI1_8831	GGAGACTAGCGAGCGAGGCA	MXI1	CAGCGCCAATGGGCTTTCGA	CGTCTCACACCG	GTTTCGAGACG	AGCCGCTTAAGAGCCTGTCG	CAGCGCCAATGGGCTTTCGACGTCTCACACCGGGAGACTAGCGAGCGAGGCAGTTTCGAGACGAGCCGCTTAAGAGCCTGTCG
65616	MYC_MYC_8854	CTCCCCTCCTGCCTCGAGAA	MYC	CAGCGCCAATGGGCTTTCGA	CGTCTCACACCG	GTTTCGAGACG	AGCCGCTTAAGAGCCTGTCG	CAGCGCCAATGGGCTTTCGACGTCTCACACCGCTCCCCTCCTGCCTCGAGAAGTTTCGAGACGAGCCGCTTAAGAGCCTGTCG
66148	NOTCH1_NOTCH1_9386	CCAGCCAGCCGGGGAAGAGA	NOTCH1	CAGCGCCAATGGGCTTTCGA	CGTCTCACACCG	GTTTCGAGACG	AGCCGCTTAAGAGCCTGTCG	CAGCGCCAATGGGCTTTCGACGTCTCACACCGCCAGCCAGCCGGGGAAGAGAGTTTCGAGACGAGCCGCTTAAGAGCCTGTCG
66149	NOTCH1_NOTCH1_9387	GCCAGCCAGCCGGGGAAGAG	NOTCH1	CAGCGCCAATGGGCTTTCGA	CGTCTCACACCG	GTTTCGAGACG	AGCCGCTTAAGAGCCTGTCG	CAGCGCCAATGGGCTTTCGACGTCTCACACCGGCCAGCCAGCCGGGGAAGAGGTTTCGAGACGAGCCGCTTAAGAGCCTGTCG
66555	SERPINE1_SERPINE1_9793	GCCTCAGCAAGTCCCAGAGA	SERPINE1	CAGCGCCAATGGGCTTTCGA	CGTCTCACACCG	GTTTCGAGACG	AGCCGCTTAAGAGCCTGTCG	CAGCGCCAATGGGCTTTCGACGTCTCACACCGGCCTCAGCAAGTCCCAGAGAGTTTCGAGACGAGCCGCTTAAGAGCCTGTCG
66556	SERPINE1_SERPINE1_9794	TCAGCAAGTCCCAGAGAGGG	SERPINE1	CAGCGCCAATGGGCTTTCGA	CGTCTCACACCG	GTTTCGAGACG	AGCCGCTTAAGAGCCTGTCG	CAGCGCCAATGGGCTTTCGACGTCTCACACCGTCAGCAAGTCCCAGAGAGGGGTTTCGAGACGAGCCGCTTAAGAGCCTGTCG
67074	PIM1_PIM1_10312	GGGCCGGCCGAGGGAGGAGA	PIM1	CAGCGCCAATGGGCTTTCGA	CGTCTCACACCG	GTTTCGAGACG	AGCCGCTTAAGAGCCTGTCG	CAGCGCCAATGGGCTTTCGACGTCTCACACCGGGGCCGGCCGAGGGAGGAGAGTTTCGAGACGAGCCGCTTAAGAGCCTGTCG
67109	PITX1_PITX1_10347	GCGGCGGCGCGGGCGGCTTG	PITX1	CAGCGCCAATGGGCTTTCGA	CGTCTCACACCG	GTTTCGAGACG	AGCCGCTTAAGAGCCTGTCG	CAGCGCCAATGGGCTTTCGACGTCTCACACCGGCGGCGGCGCGGGCGGCTTGGTTTCGAGACGAGCCGCTTAAGAGCCTGTCG
67167	PLAUR_PLAUR_10405	AGGAGGTTCGTACGGGAGGA	PLAUR	CAGCGCCAATGGGCTTTCGA	CGTCTCACACCG	GTTTCGAGACG	AGCCGCTTAAGAGCCTGTCG	CAGCGCCAATGGGCTTTCGACGTCTCACACCGAGGAGGTTCGTACGGGAGGAGTTTCGAGACGAGCCGCTTAAGAGCCTGTCG
67840	PRPS2_PRPS2_11078	GAGGGGGAGCTGGAAAGTGC	PRPS2	CAGCGCCAATGGGCTTTCGA	CGTCTCACACCG	GTTTCGAGACG	AGCCGCTTAAGAGCCTGTCG	CAGCGCCAATGGGCTTTCGACGTCTCACACCGGAGGGGGAGCTGGAAAGTGCGTTTCGAGACGAGCCGCTTAAGAGCCTGTCG
68175	PTPRC_PTPRC_11413	ACTGTAAGGGTCCTCTTTGC	PTPRC	CAGCGCCAATGGGCTTTCGA	CGTCTCACACCG	GTTTCGAGACG	AGCCGCTTAAGAGCCTGTCG	CAGCGCCAATGGGCTTTCGACGTCTCACACCGACTGTAAGGGTCCTCTTTGCGTTTCGAGACGAGCCGCTTAAGAGCCTGTCG
68198	PTPRJ_PTPRJ_11436	GGGATCCGCGGCCGGCTCGG	PTPRJ	CAGCGCCAATGGGCTTTCGA	CGTCTCACACCG	GTTTCGAGACG	AGCCGCTTAAGAGCCTGTCG	CAGCGCCAATGGGCTTTCGACGTCTCACACCGGGGATCCGCGGCCGGCTCGGGTTTCGAGACGAGCCGCTTAAGAGCCTGTCG
68306	RAB3IL1_RAB3IL1_11544	CACGGCGCTCGGAGGGAACC	RAB3IL1	CAGCGCCAATGGGCTTTCGA	CGTCTCACACCG	GTTTCGAGACG	AGCCGCTTAAGAGCCTGTCG	CAGCGCCAATGGGCTTTCGACGTCTCACACCGCACGGCGCTCGGAGGGAACCGTTTCGAGACGAGCCGCTTAAGAGCCTGTCG
68307	RAB3IL1_RAB3IL1_11545	GGGAGACCACGGCGCTCGGA	RAB3IL1	CAGCGCCAATGGGCTTTCGA	CGTCTCACACCG	GTTTCGAGACG	AGCCGCTTAAGAGCCTGTCG	CAGCGCCAATGGGCTTTCGACGTCTCACACCGGGGAGACCACGGCGCTCGGAGTTTCGAGACGAGCCGCTTAAGAGCCTGTCG
68505	RBMS1_RBMS1_11743	ACTCAGCCCTCACCTCCAGC	RBMS1	CAGCGCCAATGGGCTTTCGA	CGTCTCACACCG	GTTTCGAGACG	AGCCGCTTAAGAGCCTGTCG	CAGCGCCAATGGGCTTTCGACGTCTCACACCGACTCAGCCCTCACCTCCAGCGTTTCGAGACGAGCCGCTTAAGAGCCTGTCG
69051	CLIP1_CLIP1_12289	CGCGGCGGCGGAGCGCTGGG	CLIP1	CAGCGCCAATGGGCTTTCGA	CGTCTCACACCG	GTTTCGAGACG	AGCCGCTTAAGAGCCTGTCG	CAGCGCCAATGGGCTTTCGACGTCTCACACCGCGCGGCGGCGGAGCGCTGGGGTTTCGAGACGAGCCGCTTAAGAGCCTGTCG
69052	CLIP1_CLIP1_12290	GCGGACTCGAGGGGCCGGGC	CLIP1	CAGCGCCAATGGGCTTTCGA	CGTCTCACACCG	GTTTCGAGACG	AGCCGCTTAAGAGCCTGTCG	CAGCGCCAATGGGCTTTCGACGTCTCACACCGGCGGACTCGAGGGGCCGGGCGTTTCGAGACGAGCCGCTTAAGAGCCTGTCG
69579	SIX1_SIX1_12817	AGGCCGCACCGCCCAGAGCG	SIX1	CAGCGCCAATGGGCTTTCGA	CGTCTCACACCG	GTTTCGAGACG	AGCCGCTTAAGAGCCTGTCG	CAGCGCCAATGGGCTTTCGACGTCTCACACCGAGGCCGCACCGCCCAGAGCGGTTTCGAGACGAGCCGCTTAAGAGCCTGTCG
69647	SLC4A1_SLC4A1_12885	AAGGGGCTCCCAGGGCCAGT	SLC4A1	CAGCGCCAATGGGCTTTCGA	CGTCTCACACCG	GTTTCGAGACG	AGCCGCTTAAGAGCCTGTCG	CAGCGCCAATGGGCTTTCGACGTCTCACACCGAAGGGGCTCCCAGGGCCAGTGTTTCGAGACGAGCCGCTTAAGAGCCTGTCG
69650	SLC4A2_SLC4A2_12888	CAGGCACAGCCCGGCACCAG	SLC4A2	CAGCGCCAATGGGCTTTCGA	CGTCTCACACCG	GTTTCGAGACG	AGCCGCTTAAGAGCCTGTCG	CAGCGCCAATGGGCTTTCGACGTCTCACACCGCAGGCACAGCCCGGCACCAGGTTTCGAGACGAGCCGCTTAAGAGCCTGTCG
69652	SLC4A2_SLC4A2_12890	GTGGAGAAGCTTGGGGCAGA	SLC4A2	CAGCGCCAATGGGCTTTCGA	CGTCTCACACCG	GTTTCGAGACG	AGCCGCTTAAGAGCCTGTCG	CAGCGCCAATGGGCTTTCGACGTCTCACACCGGTGGAGAAGCTTGGGGCAGAGTTTCGAGACGAGCCGCTTAAGAGCCTGTCG
69996	SOS1_SOS1_13234	GAGCGCAGCCACAGCCCGGC	SOS1	CAGCGCCAATGGGCTTTCGA	CGTCTCACACCG	GTTTCGAGACG	AGCCGCTTAAGAGCCTGTCG	CAGCGCCAATGGGCTTTCGACGTCTCACACCGGAGCGCAGCCACAGCCCGGCGTTTCGAGACGAGCCGCTTAAGAGCCTGTCG
70018	SOX9_SOX9_13256	TGGCACTGGGCTGGGTGACG	SOX9	CAGCGCCAATGGGCTTTCGA	CGTCTCACACCG	GTTTCGAGACG	AGCCGCTTAAGAGCCTGTCG	CAGCGCCAATGGGCTTTCGACGTCTCACACCGTGGCACTGGGCTGGGTGACGGTTTCGAGACGAGCCGCTTAAGAGCCTGTCG
70019	SOX10_SOX10_13257	GCCCTGAGTGTTGGGGATGA	SOX10	CAGCGCCAATGGGCTTTCGA	CGTCTCACACCG	GTTTCGAGACG	AGCCGCTTAAGAGCCTGTCG	CAGCGCCAATGGGCTTTCGACGTCTCACACCGGCCCTGAGTGTTGGGGATGAGTTTCGAGACGAGCCGCTTAAGAGCCTGTCG
70647	TCF12_TCF12_13885	GGCCGGCAGAGGGGGCGGGG	TCF12	CAGCGCCAATGGGCTTTCGA	CGTCTCACACCG	GTTTCGAGACG	AGCCGCTTAAGAGCCTGTCG	CAGCGCCAATGGGCTTTCGACGTCTCACACCGGGCCGGCAGAGGGGGCGGGGGTTTCGAGACGAGCCGCTTAAGAGCCTGTCG
70769	TFAP4_TFAP4_14007	ATTCCTTACTCCGCGGAAGG	TFAP4	CAGCGCCAATGGGCTTTCGA	CGTCTCACACCG	GTTTCGAGACG	AGCCGCTTAAGAGCCTGTCG	CAGCGCCAATGGGCTTTCGACGTCTCACACCGATTCCTTACTCCGCGGAAGGGTTTCGAGACGAGCCGCTTAAGAGCCTGTCG
70770	TFAP4_TFAP4_14008	GCAATTCCTTACTCCGCGGA	TFAP4	CAGCGCCAATGGGCTTTCGA	CGTCTCACACCG	GTTTCGAGACG	AGCCGCTTAAGAGCCTGTCG	CAGCGCCAATGGGCTTTCGACGTCTCACACCGGCAATTCCTTACTCCGCGGAGTTTCGAGACGAGCCGCTTAAGAGCCTGTCG
70895	KLF10_KLF10_14133	GGGGGCGTCACTCAATCAGG	KLF10	CAGCGCCAATGGGCTTTCGA	CGTCTCACACCG	GTTTCGAGACG	AGCCGCTTAAGAGCCTGTCG	CAGCGCCAATGGGCTTTCGACGTCTCACACCGGGGGGCGTCACTCAATCAGGGTTTCGAGACGAGCCGCTTAAGAGCCTGTCG
70920	NKX2-1_NKX2-1_14158	GGGGATCCGGGACAGCCTCC	NKX2-1	CAGCGCCAATGGGCTTTCGA	CGTCTCACACCG	GTTTCGAGACG	AGCCGCTTAAGAGCCTGTCG	CAGCGCCAATGGGCTTTCGACGTCTCACACCGGGGGATCCGGGACAGCCTCCGTTTCGAGACGAGCCGCTTAAGAGCCTGTCG
70975	NR2E1_NR2E1_14213	AGTTGGGGGAAAAGCTAAGT	NR2E1	CAGCGCCAATGGGCTTTCGA	CGTCTCACACCG	GTTTCGAGACG	AGCCGCTTAAGAGCCTGTCG	CAGCGCCAATGGGCTTTCGACGTCTCACACCGAGTTGGGGGAAAAGCTAAGTGTTTCGAGACGAGCCGCTTAAGAGCCTGTCG
70995	GPR137B_GPR137B_14233	GGCCGGTCGGCGCGCGGGGG	GPR137B	CAGCGCCAATGGGCTTTCGA	CGTCTCACACCG	GTTTCGAGACG	AGCCGCTTAAGAGCCTGTCG	CAGCGCCAATGGGCTTTCGACGTCTCACACCGGGCCGGTCGGCGCGCGGGGGGTTTCGAGACGAGCCGCTTAAGAGCCTGTCG
71132	TPM3_TPM3_14370	GTCCACTGGAGGGAGAGCCG	TPM3	CAGCGCCAATGGGCTTTCGA	CGTCTCACACCG	GTTTCGAGACG	AGCCGCTTAAGAGCCTGTCG	CAGCGCCAATGGGCTTTCGACGTCTCACACCGGTCCACTGGAGGGAGAGCCGGTTTCGAGACGAGCCGCTTAAGAGCCTGTCG
71185	TRH_TRH_14423	AGATTTCCGGAGGAGCAGGC	TRH	CAGCGCCAATGGGCTTTCGA	CGTCTCACACCG	GTTTCGAGACG	AGCCGCTTAAGAGCCTGTCG	CAGCGCCAATGGGCTTTCGACGTCTCACACCGAGATTTCCGGAGGAGCAGGCGTTTCGAGACGAGCCGCTTAAGAGCCTGTCG
71187	TRH_TRH_14425	GCTCCTCCGGAAATCTGGGG	TRH	CAGCGCCAATGGGCTTTCGA	CGTCTCACACCG	GTTTCGAGACG	AGCCGCTTAAGAGCCTGTCG	CAGCGCCAATGGGCTTTCGACGTCTCACACCGGCTCCTCCGGAAATCTGGGGGTTTCGAGACGAGCCGCTTAAGAGCCTGTCG
71421	UBTF_UBTF_14659	CCCGGGAGGCGGCGGCGCCG	UBTF	CAGCGCCAATGGGCTTTCGA	CGTCTCACACCG	GTTTCGAGACG	AGCCGCTTAAGAGCCTGTCG	CAGCGCCAATGGGCTTTCGACGTCTCACACCGCCCGGGAGGCGGCGGCGCCGGTTTCGAGACGAGCCGCTTAAGAGCCTGTCG
71895	ZNF28_ZNF28_15133	GTGAGTCTCAGCCTCCTCCC	ZNF28	CAGCGCCAATGGGCTTTCGA	CGTCTCACACCG	GTTTCGAGACG	AGCCGCTTAAGAGCCTGTCG	CAGCGCCAATGGGCTTTCGACGTCTCACACCGGTGAGTCTCAGCCTCCTCCCGTTTCGAGACGAGCCGCTTAAGAGCCTGTCG
72028	TRIM25_TRIM25_15266	AGGACTGGGCGGGCCTCGCG	TRIM25	CAGCGCCAATGGGCTTTCGA	CGTCTCACACCG	GTTTCGAGACG	AGCCGCTTAAGAGCCTGTCG	CAGCGCCAATGGGCTTTCGACGTCTCACACCGAGGACTGGGCGGGCCTCGCGGTTTCGAGACGAGCCGCTTAAGAGCCTGTCG
72445	FXR1_FXR1_15683	GGCGGCACGTTGAGACCCCA	FXR1	CAGCGCCAATGGGCTTTCGA	CGTCTCACACCG	GTTTCGAGACG	AGCCGCTTAAGAGCCTGTCG	CAGCGCCAATGGGCTTTCGACGTCTCACACCGGGCGGCACGTTGAGACCCCAGTTTCGAGACGAGCCGCTTAAGAGCCTGTCG
72494	TAF15_TAF15_15732	CGAGCCCTGAGGCCTTCCCA	TAF15	CAGCGCCAATGGGCTTTCGA	CGTCTCACACCG	GTTTCGAGACG	AGCCGCTTAAGAGCCTGTCG	CAGCGCCAATGGGCTTTCGACGTCTCACACCGCGAGCCCTGAGGCCTTCCCAGTTTCGAGACGAGCCGCTTAAGAGCCTGTCG
72934	CUL3_CUL3_16172	CCCCGGCATCTCTCACTCTC	CUL3	CAGCGCCAATGGGCTTTCGA	CGTCTCACACCG	GTTTCGAGACG	AGCCGCTTAAGAGCCTGTCG	CAGCGCCAATGGGCTTTCGACGTCTCACACCGCCCCGGCATCTCTCACTCTCGTTTCGAGACGAGCCGCTTAAGAGCCTGTCG
73440	SRSF9_SRSF9_16678	AAGGGGTCGGCGGAGGCAAA	SRSF9	CAGCGCCAATGGGCTTTCGA	CGTCTCACACCG	GTTTCGAGACG	AGCCGCTTAAGAGCCTGTCG	CAGCGCCAATGGGCTTTCGACGTCTCACACCGAAGGGGTCGGCGGAGGCAAAGTTTCGAGACGAGCCGCTTAAGAGCCTGTCG
73580	TNFSF10_TNFSF10_16818	TTGAGACAAGAGCTGTCCCT	TNFSF10	CAGCGCCAATGGGCTTTCGA	CGTCTCACACCG	GTTTCGAGACG	AGCCGCTTAAGAGCCTGTCG	CAGCGCCAATGGGCTTTCGACGTCTCACACCGTTGAGACAAGAGCTGTCCCTGTTTCGAGACGAGCCGCTTAAGAGCCTGTCG
73790	CFLAR_CFLAR_17028	CTTGTGTCGACATCCACCCC	CFLAR	CAGCGCCAATGGGCTTTCGA	CGTCTCACACCG	GTTTCGAGACG	AGCCGCTTAAGAGCCTGTCG	CAGCGCCAATGGGCTTTCGACGTCTCACACCGCTTGTGTCGACATCCACCCCGTTTCGAGACGAGCCGCTTAAGAGCCTGTCG
74401	CBFA2T2_CBFA2T2_17639	CGCCGCCAGGCCAACGCACG	CBFA2T2	CAGCGCCAATGGGCTTTCGA	CGTCTCACACCG	GTTTCGAGACG	AGCCGCTTAAGAGCCTGTCG	CAGCGCCAATGGGCTTTCGACGTCTCACACCGCGCCGCCAGGCCAACGCACGGTTTCGAGACGAGCCGCTTAAGAGCCTGTCG
75031	ITM2B_ITM2B_18269	CCTGCCCTCGCCCCGCAGCT	ITM2B	CAGCGCCAATGGGCTTTCGA	CGTCTCACACCG	GTTTCGAGACG	AGCCGCTTAAGAGCCTGTCG	CAGCGCCAATGGGCTTTCGACGTCTCACACCGCCTGCCCTCGCCCCGCAGCTGTTTCGAGACGAGCCGCTTAAGAGCCTGTCG
75078	HAND2_HAND2_18316	TATGAGGAGGTAGCCAATCC	HAND2	CAGCGCCAATGGGCTTTCGA	CGTCTCACACCG	GTTTCGAGACG	AGCCGCTTAAGAGCCTGTCG	CAGCGCCAATGGGCTTTCGACGTCTCACACCGTATGAGGAGGTAGCCAATCCGTTTCGAGACGAGCCGCTTAAGAGCCTGTCG
75171	PAGE4_PAGE4_18409	AGCCTCTAGGAGGCGGGAGA	PAGE4	CAGCGCCAATGGGCTTTCGA	CGTCTCACACCG	GTTTCGAGACG	AGCCGCTTAAGAGCCTGTCG	CAGCGCCAATGGGCTTTCGACGTCTCACACCGAGCCTCTAGGAGGCGGGAGAGTTTCGAGACGAGCCGCTTAAGAGCCTGTCG
75243	BAG2_BAG2_18481	CCGATAGGAACCTTCGCGTG	BAG2	CAGCGCCAATGGGCTTTCGA	CGTCTCACACCG	GTTTCGAGACG	AGCCGCTTAAGAGCCTGTCG	CAGCGCCAATGGGCTTTCGACGTCTCACACCGCCGATAGGAACCTTCGCGTGGTTTCGAGACGAGCCGCTTAAGAGCCTGTCG
75333	NR1D1_NR1D1_18571	ACCTGCTCCAGTGCCGCGTG	NR1D1	CAGCGCCAATGGGCTTTCGA	CGTCTCACACCG	GTTTCGAGACG	AGCCGCTTAAGAGCCTGTCG	CAGCGCCAATGGGCTTTCGACGTCTCACACCGACCTGCTCCAGTGCCGCGTGGTTTCGAGACGAGCCGCTTAAGAGCCTGTCG
75621	RAPGEF2_RAPGEF2_18859	TGGAATGCAATTCTCAGTAT	RAPGEF2	CAGCGCCAATGGGCTTTCGA	CGTCTCACACCG	GTTTCGAGACG	AGCCGCTTAAGAGCCTGTCG	CAGCGCCAATGGGCTTTCGACGTCTCACACCGTGGAATGCAATTCTCAGTATGTTTCGAGACGAGCCGCTTAAGAGCCTGTCG
75880	SERTAD2_SERTAD2_19118	GGTCCCGGGAGGCGCGATAA	SERTAD2	CAGCGCCAATGGGCTTTCGA	CGTCTCACACCG	GTTTCGAGACG	AGCCGCTTAAGAGCCTGTCG	CAGCGCCAATGGGCTTTCGACGTCTCACACCGGGTCCCGGGAGGCGCGATAAGTTTCGAGACGAGCCGCTTAAGAGCCTGTCG
75983	ZEB2_ZEB2_19221	CACGCGCCACCTATCTTTGT	ZEB2	CAGCGCCAATGGGCTTTCGA	CGTCTCACACCG	GTTTCGAGACG	AGCCGCTTAAGAGCCTGTCG	CAGCGCCAATGGGCTTTCGACGTCTCACACCGCACGCGCCACCTATCTTTGTGTTTCGAGACGAGCCGCTTAAGAGCCTGTCG
75985	ZEB2_ZEB2_19223	GATAGGTGGCGCGTGTTTCA	ZEB2	CAGCGCCAATGGGCTTTCGA	CGTCTCACACCG	GTTTCGAGACG	AGCCGCTTAAGAGCCTGTCG	CAGCGCCAATGGGCTTTCGACGTCTCACACCGGATAGGTGGCGCGTGTTTCAGTTTCGAGACGAGCCGCTTAAGAGCCTGTCG
77017	IRX5_IRX5_20255	GGGAGAGGGCGAGGCGCGCC	IRX5	CAGCGCCAATGGGCTTTCGA	CGTCTCACACCG	GTTTCGAGACG	AGCCGCTTAAGAGCCTGTCG	CAGCGCCAATGGGCTTTCGACGTCTCACACCGGGGAGAGGGCGAGGCGCGCCGTTTCGAGACGAGCCGCTTAAGAGCCTGTCG
77238	KLF2_KLF2_20476	GCCGCGGTATATAAGCCGGC	KLF2	CAGCGCCAATGGGCTTTCGA	CGTCTCACACCG	GTTTCGAGACG	AGCCGCTTAAGAGCCTGTCG	CAGCGCCAATGGGCTTTCGACGTCTCACACCGGCCGCGGTATATAAGCCGGCGTTTCGAGACGAGCCGCTTAAGAGCCTGTCG
77871	PDPN_PDPN_21109	CCGCAAGGTGGTCTCCGTCC	PDPN	CAGCGCCAATGGGCTTTCGA	CGTCTCACACCG	GTTTCGAGACG	AGCCGCTTAAGAGCCTGTCG	CAGCGCCAATGGGCTTTCGACGTCTCACACCGCCGCAAGGTGGTCTCCGTCCGTTTCGAGACGAGCCGCTTAAGAGCCTGTCG
78588	IFI44L_IFI44L_21826	TGCCTGCCTACATACATACA	IFI44L	CAGCGCCAATGGGCTTTCGA	CGTCTCACACCG	GTTTCGAGACG	AGCCGCTTAAGAGCCTGTCG	CAGCGCCAATGGGCTTTCGACGTCTCACACCGTGCCTGCCTACATACATACAGTTTCGAGACGAGCCGCTTAAGAGCCTGTCG
79132	WBP4_WBP4_22370	CTCCCGGCTCCAAAGAGGTG	WBP4	CAGCGCCAATGGGCTTTCGA	CGTCTCACACCG	GTTTCGAGACG	AGCCGCTTAAGAGCCTGTCG	CAGCGCCAATGGGCTTTCGACGTCTCACACCGCTCCCGGCTCCAAAGAGGTGGTTTCGAGACGAGCCGCTTAAGAGCCTGTCG
79436	TFEC_TFEC_22674	CCTGGTTGGAATTTCAGTTA	TFEC	CAGCGCCAATGGGCTTTCGA	CGTCTCACACCG	GTTTCGAGACG	AGCCGCTTAAGAGCCTGTCG	CAGCGCCAATGGGCTTTCGACGTCTCACACCGCCTGGTTGGAATTTCAGTTAGTTTCGAGACGAGCCGCTTAAGAGCCTGTCG
79438	TFEC_TFEC_22676	TTAGGGCATTTCCTGAACCC	TFEC	CAGCGCCAATGGGCTTTCGA	CGTCTCACACCG	GTTTCGAGACG	AGCCGCTTAAGAGCCTGTCG	CAGCGCCAATGGGCTTTCGACGTCTCACACCGTTAGGGCATTTCCTGAACCCGTTTCGAGACGAGCCGCTTAAGAGCCTGTCG
79443	RRAS2_RRAS2_22681	ACTCTCACGCACTCGCTCAC	RRAS2	CAGCGCCAATGGGCTTTCGA	CGTCTCACACCG	GTTTCGAGACG	AGCCGCTTAAGAGCCTGTCG	CAGCGCCAATGGGCTTTCGACGTCTCACACCGACTCTCACGCACTCGCTCACGTTTCGAGACGAGCCGCTTAAGAGCCTGTCG
79444	RRAS2_RRAS2_22682	TGAGGTTCGGGAGGTAACCC	RRAS2	CAGCGCCAATGGGCTTTCGA	CGTCTCACACCG	GTTTCGAGACG	AGCCGCTTAAGAGCCTGTCG	CAGCGCCAATGGGCTTTCGACGTCTCACACCGTGAGGTTCGGGAGGTAACCCGTTTCGAGACGAGCCGCTTAAGAGCCTGTCG
79472	RASA3_RASA3_22710	GGCGGGTGGCGGAGACCCGG	RASA3	CAGCGCCAATGGGCTTTCGA	CGTCTCACACCG	GTTTCGAGACG	AGCCGCTTAAGAGCCTGTCG	CAGCGCCAATGGGCTTTCGACGTCTCACACCGGGCGGGTGGCGGAGACCCGGGTTTCGAGACGAGCCGCTTAAGAGCCTGTCG
79962	PDS5B_PDS5B_23200	AACCGCCGCGGACAGCACCC	PDS5B	CAGCGCCAATGGGCTTTCGA	CGTCTCACACCG	GTTTCGAGACG	AGCCGCTTAAGAGCCTGTCG	CAGCGCCAATGGGCTTTCGACGTCTCACACCGAACCGCCGCGGACAGCACCCGTTTCGAGACGAGCCGCTTAAGAGCCTGTCG
79964	PDS5B_PDS5B_23202	CTGCCCCCGGGTGCTGTCCG	PDS5B	CAGCGCCAATGGGCTTTCGA	CGTCTCACACCG	GTTTCGAGACG	AGCCGCTTAAGAGCCTGTCG	CAGCGCCAATGGGCTTTCGACGTCTCACACCGCTGCCCCCGGGTGCTGTCCGGTTTCGAGACGAGCCGCTTAAGAGCCTGTCG
80027	RRP1B_RRP1B_23265	TCTGGGAGTGAGCGCGGCAG	RRP1B	CAGCGCCAATGGGCTTTCGA	CGTCTCACACCG	GTTTCGAGACG	AGCCGCTTAAGAGCCTGTCG	CAGCGCCAATGGGCTTTCGACGTCTCACACCGTCTGGGAGTGAGCGCGGCAGGTTTCGAGACGAGCCGCTTAAGAGCCTGTCG
80045	ERC1_ERC1_23283	TCACGCTCCCGGGAGGCTGA	ERC1	CAGCGCCAATGGGCTTTCGA	CGTCTCACACCG	GTTTCGAGACG	AGCCGCTTAAGAGCCTGTCG	CAGCGCCAATGGGCTTTCGACGTCTCACACCGTCACGCTCCCGGGAGGCTGAGTTTCGAGACGAGCCGCTTAAGAGCCTGTCG
80264	RGL1_RGL1_23502	GAAAGCCTTACATCACGGAG	RGL1	CAGCGCCAATGGGCTTTCGA	CGTCTCACACCG	GTTTCGAGACG	AGCCGCTTAAGAGCCTGTCG	CAGCGCCAATGGGCTTTCGACGTCTCACACCGGAAAGCCTTACATCACGGAGGTTTCGAGACGAGCCGCTTAAGAGCCTGTCG
80595	SATB2_SATB2_23833	CCGCGCCGAGCCGAACGTCC	SATB2	CAGCGCCAATGGGCTTTCGA	CGTCTCACACCG	GTTTCGAGACG	AGCCGCTTAAGAGCCTGTCG	CAGCGCCAATGGGCTTTCGACGTCTCACACCGCCGCGCCGAGCCGAACGTCCGTTTCGAGACGAGCCGCTTAAGAGCCTGTCG
80670	DOCK9_DOCK9_23908	TGGAGTAGTAACACCCCTGG	DOCK9	CAGCGCCAATGGGCTTTCGA	CGTCTCACACCG	GTTTCGAGACG	AGCCGCTTAAGAGCCTGTCG	CAGCGCCAATGGGCTTTCGACGTCTCACACCGTGGAGTAGTAACACCCCTGGGTTTCGAGACGAGCCGCTTAAGAGCCTGTCG
80773	KIAA0368_KIAA0368_24011	GCCACCTCCACACCAGAACT	KIAA0368	CAGCGCCAATGGGCTTTCGA	CGTCTCACACCG	GTTTCGAGACG	AGCCGCTTAAGAGCCTGTCG	CAGCGCCAATGGGCTTTCGACGTCTCACACCGGCCACCTCCACACCAGAACTGTTTCGAGACGAGCCGCTTAAGAGCCTGTCG
80824	ZFPM2_ZFPM2_24062	CCCCGCACTTCGCCCGACCA	ZFPM2	CAGCGCCAATGGGCTTTCGA	CGTCTCACACCG	GTTTCGAGACG	AGCCGCTTAAGAGCCTGTCG	CAGCGCCAATGGGCTTTCGACGTCTCACACCGCCCCGCACTTCGCCCGACCAGTTTCGAGACGAGCCGCTTAAGAGCCTGTCG
81642	NIPBL_NIPBL_24880	GCAGGAATGACTCCCTCCGC	NIPBL	CAGCGCCAATGGGCTTTCGA	CGTCTCACACCG	GTTTCGAGACG	AGCCGCTTAAGAGCCTGTCG	CAGCGCCAATGGGCTTTCGACGTCTCACACCGGCAGGAATGACTCCCTCCGCGTTTCGAGACGAGCCGCTTAAGAGCCTGTCG
81643	NIPBL_NIPBL_24881	TAGTGTTTGGCGCCGGCGGA	NIPBL	CAGCGCCAATGGGCTTTCGA	CGTCTCACACCG	GTTTCGAGACG	AGCCGCTTAAGAGCCTGTCG	CAGCGCCAATGGGCTTTCGACGTCTCACACCGTAGTGTTTGGCGCCGGCGGAGTTTCGAGACGAGCCGCTTAAGAGCCTGTCG
81842	WWTR1_WWTR1_25080	GGGCTGGCCGGCTAGGGACT	WWTR1	CAGCGCCAATGGGCTTTCGA	CGTCTCACACCG	GTTTCGAGACG	AGCCGCTTAAGAGCCTGTCG	CAGCGCCAATGGGCTTTCGACGTCTCACACCGGGGCTGGCCGGCTAGGGACTGTTTCGAGACGAGCCGCTTAAGAGCCTGTCG
82535	CNNM4_CNNM4_25773	AAGCGACTGTACCCCCTTAA	CNNM4	CAGCGCCAATGGGCTTTCGA	CGTCTCACACCG	GTTTCGAGACG	AGCCGCTTAAGAGCCTGTCG	CAGCGCCAATGGGCTTTCGACGTCTCACACCGAAGCGACTGTACCCCCTTAAGTTTCGAGACGAGCCGCTTAAGAGCCTGTCG
82573	LATS2_LATS2_25811	GAGCGGCCGCGGAGGAGCAG	LATS2	CAGCGCCAATGGGCTTTCGA	CGTCTCACACCG	GTTTCGAGACG	AGCCGCTTAAGAGCCTGTCG	CAGCGCCAATGGGCTTTCGACGTCTCACACCGGAGCGGCCGCGGAGGAGCAGGTTTCGAGACGAGCCGCTTAAGAGCCTGTCG
85169	AMOTL2_AMOTL2_28407	GTGCGCTGAGAGGTTATTTG	AMOTL2	CAGCGCCAATGGGCTTTCGA	CGTCTCACACCG	GTTTCGAGACG	AGCCGCTTAAGAGCCTGTCG	CAGCGCCAATGGGCTTTCGACGTCTCACACCGGTGCGCTGAGAGGTTATTTGGTTTCGAGACGAGCCGCTTAAGAGCCTGTCG
85440	TRIM33_TRIM33_28678	ACGCAAGGAACTGGCTTCGA	TRIM33	CAGCGCCAATGGGCTTTCGA	CGTCTCACACCG	GTTTCGAGACG	AGCCGCTTAAGAGCCTGTCG	CAGCGCCAATGGGCTTTCGACGTCTCACACCGACGCAAGGAACTGGCTTCGAGTTTCGAGACGAGCCGCTTAAGAGCCTGTCG
86005	SOX18_SOX18_29243	GTGCGCGGGGGAGGCCTCAG	SOX18	CAGCGCCAATGGGCTTTCGA	CGTCTCACACCG	GTTTCGAGACG	AGCCGCTTAAGAGCCTGTCG	CAGCGCCAATGGGCTTTCGACGTCTCACACCGGTGCGCGGGGGAGGCCTCAGGTTTCGAGACGAGCCGCTTAAGAGCCTGTCG
86006	SOX18_SOX18_29244	TGAGAAGAAAGGGAGCCCCC	SOX18	CAGCGCCAATGGGCTTTCGA	CGTCTCACACCG	GTTTCGAGACG	AGCCGCTTAAGAGCCTGTCG	CAGCGCCAATGGGCTTTCGACGTCTCACACCGTGAGAAGAAAGGGAGCCCCCGTTTCGAGACGAGCCGCTTAAGAGCCTGTCG
86191	PCDH18_PCDH18_29429	ATGGAGTCACCCAAGGAGGG	PCDH18	CAGCGCCAATGGGCTTTCGA	CGTCTCACACCG	GTTTCGAGACG	AGCCGCTTAAGAGCCTGTCG	CAGCGCCAATGGGCTTTCGACGTCTCACACCGATGGAGTCACCCAAGGAGGGGTTTCGAGACGAGCCGCTTAAGAGCCTGTCG
86543	MBTD1_MBTD1_29781	CTCCTCTCTCGCTTCCACCG	MBTD1	CAGCGCCAATGGGCTTTCGA	CGTCTCACACCG	GTTTCGAGACG	AGCCGCTTAAGAGCCTGTCG	CAGCGCCAATGGGCTTTCGACGTCTCACACCGCTCCTCTCTCGCTTCCACCGGTTTCGAGACGAGCCGCTTAAGAGCCTGTCG
86780	PQLC2_PQLC2_30018	AGGAGCGCGGAGGCAGTTGG	PQLC2	CAGCGCCAATGGGCTTTCGA	CGTCTCACACCG	GTTTCGAGACG	AGCCGCTTAAGAGCCTGTCG	CAGCGCCAATGGGCTTTCGACGTCTCACACCGAGGAGCGCGGAGGCAGTTGGGTTTCGAGACGAGCCGCTTAAGAGCCTGTCG
86781	PQLC2_PQLC2_30019	GACAACAGGCGCGGCCCCAG	PQLC2	CAGCGCCAATGGGCTTTCGA	CGTCTCACACCG	GTTTCGAGACG	AGCCGCTTAAGAGCCTGTCG	CAGCGCCAATGGGCTTTCGACGTCTCACACCGGACAACAGGCGCGGCCCCAGGTTTCGAGACGAGCCGCTTAAGAGCCTGTCG
87720	MCOLN3_MCOLN3_30958	GTCACGAGTTAAAGCGGCGG	MCOLN3	CAGCGCCAATGGGCTTTCGA	CGTCTCACACCG	GTTTCGAGACG	AGCCGCTTAAGAGCCTGTCG	CAGCGCCAATGGGCTTTCGACGTCTCACACCGGTCACGAGTTAAAGCGGCGGGTTTCGAGACGAGCCGCTTAAGAGCCTGTCG
87894	LAPTM4B_LAPTM4B_31132	CGCTGATGGATTTACTCACC	LAPTM4B	CAGCGCCAATGGGCTTTCGA	CGTCTCACACCG	GTTTCGAGACG	AGCCGCTTAAGAGCCTGTCG	CAGCGCCAATGGGCTTTCGACGTCTCACACCGCGCTGATGGATTTACTCACCGTTTCGAGACGAGCCGCTTAAGAGCCTGTCG
88572	CMTR2_CMTR2_31810	ACTCCGCGAAGCAAAACCTA	CMTR2	CAGCGCCAATGGGCTTTCGA	CGTCTCACACCG	GTTTCGAGACG	AGCCGCTTAAGAGCCTGTCG	CAGCGCCAATGGGCTTTCGACGTCTCACACCGACTCCGCGAAGCAAAACCTAGTTTCGAGACGAGCCGCTTAAGAGCCTGTCG
89335	ZC3HAV1_ZC3HAV1_32573	GGTCTGCTCTTTCCGGGAAT	ZC3HAV1	CAGCGCCAATGGGCTTTCGA	CGTCTCACACCG	GTTTCGAGACG	AGCCGCTTAAGAGCCTGTCG	CAGCGCCAATGGGCTTTCGACGTCTCACACCGGGTCTGCTCTTTCCGGGAATGTTTCGAGACGAGCCGCTTAAGAGCCTGTCG
90373	SEMA6A_SEMA6A_33611	GCAGAGGCGGAGAAACTACG	SEMA6A	CAGCGCCAATGGGCTTTCGA	CGTCTCACACCG	GTTTCGAGACG	AGCCGCTTAAGAGCCTGTCG	CAGCGCCAATGGGCTTTCGACGTCTCACACCGGCAGAGGCGGAGAAACTACGGTTTCGAGACGAGCCGCTTAAGAGCCTGTCG
90476	BAHCC1_BAHCC1_33714	CGAGCGGCGGCCAGGCCGGG	BAHCC1	CAGCGCCAATGGGCTTTCGA	CGTCTCACACCG	GTTTCGAGACG	AGCCGCTTAAGAGCCTGTCG	CAGCGCCAATGGGCTTTCGACGTCTCACACCGCGAGCGGCGGCCAGGCCGGGGTTTCGAGACGAGCCGCTTAAGAGCCTGTCG
90593	GRAMD1A_GRAMD1A_33831	GGCCGCAGAGGCCTAGAAGG	GRAMD1A	CAGCGCCAATGGGCTTTCGA	CGTCTCACACCG	GTTTCGAGACG	AGCCGCTTAAGAGCCTGTCG	CAGCGCCAATGGGCTTTCGACGTCTCACACCGGGCCGCAGAGGCCTAGAAGGGTTTCGAGACGAGCCGCTTAAGAGCCTGTCG
91973	FNDC3B_FNDC3B_35211	TCGCAGAAGCTGTTGTCCCC	FNDC3B	CAGCGCCAATGGGCTTTCGA	CGTCTCACACCG	GTTTCGAGACG	AGCCGCTTAAGAGCCTGTCG	CAGCGCCAATGGGCTTTCGACGTCTCACACCGTCGCAGAAGCTGTTGTCCCCGTTTCGAGACGAGCCGCTTAAGAGCCTGTCG
93876	TRPM3_TRPM3_37114	TCCCGAAGCAGCACATTCCA	TRPM3	CAGCGCCAATGGGCTTTCGA	CGTCTCACACCG	GTTTCGAGACG	AGCCGCTTAAGAGCCTGTCG	CAGCGCCAATGGGCTTTCGACGTCTCACACCGTCCCGAAGCAGCACATTCCAGTTTCGAGACGAGCCGCTTAAGAGCCTGTCG
93952	ZNF703_ZNF703_37190	CTGAGGCCGGCTCCATCGGT	ZNF703	CAGCGCCAATGGGCTTTCGA	CGTCTCACACCG	GTTTCGAGACG	AGCCGCTTAAGAGCCTGTCG	CAGCGCCAATGGGCTTTCGACGTCTCACACCGCTGAGGCCGGCTCCATCGGTGTTTCGAGACGAGCCGCTTAAGAGCCTGTCG
93954	ZNF703_ZNF703_37192	TCCCGGCGAGAGCTGCGATT	ZNF703	CAGCGCCAATGGGCTTTCGA	CGTCTCACACCG	GTTTCGAGACG	AGCCGCTTAAGAGCCTGTCG	CAGCGCCAATGGGCTTTCGACGTCTCACACCGTCCCGGCGAGAGCTGCGATTGTTTCGAGACGAGCCGCTTAAGAGCCTGTCG
94931	TCF7L1_TCF7L1_38169	CCGGGTTCCGCGAGGCGCGC	TCF7L1	CAGCGCCAATGGGCTTTCGA	CGTCTCACACCG	GTTTCGAGACG	AGCCGCTTAAGAGCCTGTCG	CAGCGCCAATGGGCTTTCGACGTCTCACACCGCCGGGTTCCGCGAGGCGCGCGTTTCGAGACGAGCCGCTTAAGAGCCTGTCG
95623	ARID5B_ARID5B_38861	GCAACTCCAGCAAAGTCCTC	ARID5B	CAGCGCCAATGGGCTTTCGA	CGTCTCACACCG	GTTTCGAGACG	AGCCGCTTAAGAGCCTGTCG	CAGCGCCAATGGGCTTTCGACGTCTCACACCGGCAACTCCAGCAAAGTCCTCGTTTCGAGACGAGCCGCTTAAGAGCCTGTCG
95624	ARID5B_ARID5B_38862	TCAGGCTCATCCCACACACT	ARID5B	CAGCGCCAATGGGCTTTCGA	CGTCTCACACCG	GTTTCGAGACG	AGCCGCTTAAGAGCCTGTCG	CAGCGCCAATGGGCTTTCGACGTCTCACACCGTCAGGCTCATCCCACACACTGTTTCGAGACGAGCCGCTTAAGAGCCTGTCG
96051	MAML2_MAML2_39289	GCTCGTTCGAGGCTCCCTGG	MAML2	CAGCGCCAATGGGCTTTCGA	CGTCTCACACCG	GTTTCGAGACG	AGCCGCTTAAGAGCCTGTCG	CAGCGCCAATGGGCTTTCGACGTCTCACACCGGCTCGTTCGAGGCTCCCTGGGTTTCGAGACGAGCCGCTTAAGAGCCTGTCG
96353	INSM2_INSM2_39591	CTACTCCAGTGAATCGGCAC	INSM2	CAGCGCCAATGGGCTTTCGA	CGTCTCACACCG	GTTTCGAGACG	AGCCGCTTAAGAGCCTGTCG	CAGCGCCAATGGGCTTTCGACGTCTCACACCGCTACTCCAGTGAATCGGCACGTTTCGAGACGAGCCGCTTAAGAGCCTGTCG
96538	ZNF503_ZNF503_39776	AGGGAGCTGCCCATTAAAAC	ZNF503	CAGCGCCAATGGGCTTTCGA	CGTCTCACACCG	GTTTCGAGACG	AGCCGCTTAAGAGCCTGTCG	CAGCGCCAATGGGCTTTCGACGTCTCACACCGAGGGAGCTGCCCATTAAAACGTTTCGAGACGAGCCGCTTAAGAGCCTGTCG
98043	OTOP2_OTOP2_41281	GAAAGATGGATCATGTGAGC	OTOP2	CAGCGCCAATGGGCTTTCGA	CGTCTCACACCG	GTTTCGAGACG	AGCCGCTTAAGAGCCTGTCG	CAGCGCCAATGGGCTTTCGACGTCTCACACCGGAAAGATGGATCATGTGAGCGTTTCGAGACGAGCCGCTTAAGAGCCTGTCG
100281	RNF19B_RNF19B_43519	GCCCAGCGCACTCCTAGACC	RNF19B	CAGCGCCAATGGGCTTTCGA	CGTCTCACACCG	GTTTCGAGACG	AGCCGCTTAAGAGCCTGTCG	CAGCGCCAATGGGCTTTCGACGTCTCACACCGGCCCAGCGCACTCCTAGACCGTTTCGAGACGAGCCGCTTAAGAGCCTGTCG
100526	MITD1_MITD1_43764	GGAGGTCGCGCTCACTGCGA	MITD1	CAGCGCCAATGGGCTTTCGA	CGTCTCACACCG	GTTTCGAGACG	AGCCGCTTAAGAGCCTGTCG	CAGCGCCAATGGGCTTTCGACGTCTCACACCGGGAGGTCGCGCTCACTGCGAGTTTCGAGACGAGCCGCTTAAGAGCCTGTCG
100720	LRRC15_LRRC15_43958	AGTGTCAGCCCGGGACATGC	LRRC15	CAGCGCCAATGGGCTTTCGA	CGTCTCACACCG	GTTTCGAGACG	AGCCGCTTAAGAGCCTGTCG	CAGCGCCAATGGGCTTTCGACGTCTCACACCGAGTGTCAGCCCGGGACATGCGTTTCGAGACGAGCCGCTTAAGAGCCTGTCG
100834	C4orf36_C4orf36_44072	CCGCGACGTCCCTTGCCGCT	C4orf36	CAGCGCCAATGGGCTTTCGA	CGTCTCACACCG	GTTTCGAGACG	AGCCGCTTAAGAGCCTGTCG	CAGCGCCAATGGGCTTTCGACGTCTCACACCGCCGCGACGTCCCTTGCCGCTGTTTCGAGACGAGCCGCTTAAGAGCCTGTCG
103770	GLIS3_GLIS3_47008	CACAAGCTCGGCCTTCGAAT	GLIS3	CAGCGCCAATGGGCTTTCGA	CGTCTCACACCG	GTTTCGAGACG	AGCCGCTTAAGAGCCTGTCG	CAGCGCCAATGGGCTTTCGACGTCTCACACCGCACAAGCTCGGCCTTCGAATGTTTCGAGACGAGCCGCTTAAGAGCCTGTCG
104591	GSX1_GSX1_47829	GCGGCCGGGGCCTCTCAATA	GSX1	CAGCGCCAATGGGCTTTCGA	CGTCTCACACCG	GTTTCGAGACG	AGCCGCTTAAGAGCCTGTCG	CAGCGCCAATGGGCTTTCGACGTCTCACACCGGCGGCCGGGGCCTCTCAATAGTTTCGAGACGAGCCGCTTAAGAGCCTGTCG
104901	Mar.08_39508_48139	AGCACAGAAAGGCCGCGCGG	2008-03-01	CAGCGCCAATGGGCTTTCGA	CGTCTCACACCG	GTTTCGAGACG	AGCCGCTTAAGAGCCTGTCG	CAGCGCCAATGGGCTTTCGACGTCTCACACCGAGCACAGAAAGGCCGCGCGGGTTTCGAGACGAGCCGCTTAAGAGCCTGTCG
104919	JMJD1C_JMJD1C_48157	TCCCCCGTCACAGGTGCTGA	JMJD1C	CAGCGCCAATGGGCTTTCGA	CGTCTCACACCG	GTTTCGAGACG	AGCCGCTTAAGAGCCTGTCG	CAGCGCCAATGGGCTTTCGACGTCTCACACCGTCCCCCGTCACAGGTGCTGAGTTTCGAGACGAGCCGCTTAAGAGCCTGTCG
104920	JMJD1C_JMJD1C_48158	TGTAACTAATCCCCCGTCAC	JMJD1C	CAGCGCCAATGGGCTTTCGA	CGTCTCACACCG	GTTTCGAGACG	AGCCGCTTAAGAGCCTGTCG	CAGCGCCAATGGGCTTTCGACGTCTCACACCGTGTAACTAATCCCCCGTCACGTTTCGAGACGAGCCGCTTAAGAGCCTGTCG
105598	RASGEF1C_RASGEF1C_48836	CACCAGGGCCCTCCGTGCCC	RASGEF1C	CAGCGCCAATGGGCTTTCGA	CGTCTCACACCG	GTTTCGAGACG	AGCCGCTTAAGAGCCTGTCG	CAGCGCCAATGGGCTTTCGACGTCTCACACCGCACCAGGGCCCTCCGTGCCCGTTTCGAGACGAGCCGCTTAAGAGCCTGTCG
106329	UBALD2_UBALD2_49567	GCCAGCGCCCGGCTCCCGTA	UBALD2	CAGCGCCAATGGGCTTTCGA	CGTCTCACACCG	GTTTCGAGACG	AGCCGCTTAAGAGCCTGTCG	CAGCGCCAATGGGCTTTCGACGTCTCACACCGGCCAGCGCCCGGCTCCCGTAGTTTCGAGACGAGCCGCTTAAGAGCCTGTCG
109140	ANXA2R_ANXA2R_52378	CCACCGGAAAACTGTCTGCT	ANXA2R	CAGCGCCAATGGGCTTTCGA	CGTCTCACACCG	GTTTCGAGACG	AGCCGCTTAAGAGCCTGTCG	CAGCGCCAATGGGCTTTCGACGTCTCACACCGCCACCGGAAAACTGTCTGCTGTTTCGAGACGAGCCGCTTAAGAGCCTGTCG
109417	BSX_BSX_52655	GGCAGAGGGGAGGGTGCGGG	BSX	CAGCGCCAATGGGCTTTCGA	CGTCTCACACCG	GTTTCGAGACG	AGCCGCTTAAGAGCCTGTCG	CAGCGCCAATGGGCTTTCGACGTCTCACACCGGGCAGAGGGGAGGGTGCGGGGTTTCGAGACGAGCCGCTTAAGAGCCTGTCG
110349	MAP1LC3C_MAP1LC3C_53587	GACCTCCTGCTGCCCAGGGA	MAP1LC3C	CAGCGCCAATGGGCTTTCGA	CGTCTCACACCG	GTTTCGAGACG	AGCCGCTTAAGAGCCTGTCG	CAGCGCCAATGGGCTTTCGACGTCTCACACCGGACCTCCTGCTGCCCAGGGAGTTTCGAGACGAGCCGCTTAAGAGCCTGTCG
111254	FOXD4L6_FOXD4L6_54492	AGCATCTTGAGGAGGTGGGA	FOXD4L6	CAGCGCCAATGGGCTTTCGA	CGTCTCACACCG	GTTTCGAGACG	AGCCGCTTAAGAGCCTGTCG	CAGCGCCAATGGGCTTTCGACGTCTCACACCGAGCATCTTGAGGAGGTGGGAGTTTCGAGACGAGCCGCTTAAGAGCCTGTCG
1	NO-TARGET_4512	AAACGAGATCGAGAAAGGTA	NO-TARGET	CAGCGCCAATGGGCTTTCGA	CGTCTCACACCG	GTTTCGAGACG	AGCCGCTTAAGAGCCTGTCG	CAGCGCCAATGGGCTTTCGACGTCTCACACCGAAACGAGATCGAGAAAGGTAGTTTCGAGACGAGCCGCTTAAGAGCCTGTCG
2	NO-TARGET_10011	AAATTGGCTTTCGTTCGTGC	NO-TARGET	CAGCGCCAATGGGCTTTCGA	CGTCTCACACCG	GTTTCGAGACG	AGCCGCTTAAGAGCCTGTCG	CAGCGCCAATGGGCTTTCGACGTCTCACACCGAAATTGGCTTTCGTTCGTGCGTTTCGAGACGAGCCGCTTAAGAGCCTGTCG
3	NO-TARGET_2759	AATCGCAGGTATCCCAGAGC	NO-TARGET	CAGCGCCAATGGGCTTTCGA	CGTCTCACACCG	GTTTCGAGACG	AGCCGCTTAAGAGCCTGTCG	CAGCGCCAATGGGCTTTCGACGTCTCACACCGAATCGCAGGTATCCCAGAGCGTTTCGAGACGAGCCGCTTAAGAGCCTGTCG
4	NO-TARGET_3699	ACAGCGCTCTCGTGTACTAT	NO-TARGET	CAGCGCCAATGGGCTTTCGA	CGTCTCACACCG	GTTTCGAGACG	AGCCGCTTAAGAGCCTGTCG	CAGCGCCAATGGGCTTTCGACGTCTCACACCGACAGCGCTCTCGTGTACTATGTTTCGAGACGAGCCGCTTAAGAGCCTGTCG
5	NO-TARGET_5257	ACTAGCCTGTTCGCGAGTAG	NO-TARGET	CAGCGCCAATGGGCTTTCGA	CGTCTCACACCG	GTTTCGAGACG	AGCCGCTTAAGAGCCTGTCG	CAGCGCCAATGGGCTTTCGACGTCTCACACCGACTAGCCTGTTCGCGAGTAGGTTTCGAGACGAGCCGCTTAAGAGCCTGTCG
6	NO-TARGET_5917	AGAAACTGAACTATCCTACT	NO-TARGET	CAGCGCCAATGGGCTTTCGA	CGTCTCACACCG	GTTTCGAGACG	AGCCGCTTAAGAGCCTGTCG	CAGCGCCAATGGGCTTTCGACGTCTCACACCGAGAAACTGAACTATCCTACTGTTTCGAGACGAGCCGCTTAAGAGCCTGTCG
7	NO-TARGET_10485	ATACGCATGATTGCAAGAGG	NO-TARGET	CAGCGCCAATGGGCTTTCGA	CGTCTCACACCG	GTTTCGAGACG	AGCCGCTTAAGAGCCTGTCG	CAGCGCCAATGGGCTTTCGACGTCTCACACCGATACGCATGATTGCAAGAGGGTTTCGAGACGAGCCGCTTAAGAGCCTGTCG
8	NO-TARGET_11323	ATGCCTTAGACTTAACCTCG	NO-TARGET	CAGCGCCAATGGGCTTTCGA	CGTCTCACACCG	GTTTCGAGACG	AGCCGCTTAAGAGCCTGTCG	CAGCGCCAATGGGCTTTCGACGTCTCACACCGATGCCTTAGACTTAACCTCGGTTTCGAGACGAGCCGCTTAAGAGCCTGTCG
9	NO-TARGET_15171	CATAAGGTTAACTGCGTGGA	NO-TARGET	CAGCGCCAATGGGCTTTCGA	CGTCTCACACCG	GTTTCGAGACG	AGCCGCTTAAGAGCCTGTCG	CAGCGCCAATGGGCTTTCGACGTCTCACACCGCATAAGGTTAACTGCGTGGAGTTTCGAGACGAGCCGCTTAAGAGCCTGTCG
10	NO-TARGET_19623	CCTAAACTCAGACGCACTAC	NO-TARGET	CAGCGCCAATGGGCTTTCGA	CGTCTCACACCG	GTTTCGAGACG	AGCCGCTTAAGAGCCTGTCG	CAGCGCCAATGGGCTTTCGACGTCTCACACCGCCTAAACTCAGACGCACTACGTTTCGAGACGAGCCGCTTAAGAGCCTGTCG
11	NO-TARGET_20814	CGAACTTAATCCCGTGGCAA	NO-TARGET	CAGCGCCAATGGGCTTTCGA	CGTCTCACACCG	GTTTCGAGACG	AGCCGCTTAAGAGCCTGTCG	CAGCGCCAATGGGCTTTCGACGTCTCACACCGCGAACTTAATCCCGTGGCAAGTTTCGAGACGAGCCGCTTAAGAGCCTGTCG
12	NO-TARGET_21496	CGCATAAGTCGATAGACACA	NO-TARGET	CAGCGCCAATGGGCTTTCGA	CGTCTCACACCG	GTTTCGAGACG	AGCCGCTTAAGAGCCTGTCG	CAGCGCCAATGGGCTTTCGACGTCTCACACCGCGCATAAGTCGATAGACACAGTTTCGAGACGAGCCGCTTAAGAGCCTGTCG
13	NO-TARGET_25398	CTCCTTACGTCGGGCATTAA	NO-TARGET	CAGCGCCAATGGGCTTTCGA	CGTCTCACACCG	GTTTCGAGACG	AGCCGCTTAAGAGCCTGTCG	CAGCGCCAATGGGCTTTCGACGTCTCACACCGCTCCTTACGTCGGGCATTAAGTTTCGAGACGAGCCGCTTAAGAGCCTGTCG
14	NO-TARGET_28229	GAACGTCCAAGCAAGGGAGC	NO-TARGET	CAGCGCCAATGGGCTTTCGA	CGTCTCACACCG	GTTTCGAGACG	AGCCGCTTAAGAGCCTGTCG	CAGCGCCAATGGGCTTTCGACGTCTCACACCGGAACGTCCAAGCAAGGGAGCGTTTCGAGACGAGCCGCTTAAGAGCCTGTCG
15	NO-TARGET_29832	GAGAGTGCGCCTTGATAGTA	NO-TARGET	CAGCGCCAATGGGCTTTCGA	CGTCTCACACCG	GTTTCGAGACG	AGCCGCTTAAGAGCCTGTCG	CAGCGCCAATGGGCTTTCGACGTCTCACACCGGAGAGTGCGCCTTGATAGTAGTTTCGAGACGAGCCGCTTAAGAGCCTGTCG
16	NO-TARGET_31281	GATCCAGCAATATTTCTTAA	NO-TARGET	CAGCGCCAATGGGCTTTCGA	CGTCTCACACCG	GTTTCGAGACG	AGCCGCTTAAGAGCCTGTCG	CAGCGCCAATGGGCTTTCGACGTCTCACACCGGATCCAGCAATATTTCTTAAGTTTCGAGACGAGCCGCTTAAGAGCCTGTCG
17	NO-TARGET_10969	ATCGGTACCTCTTCACATAT	NO-TARGET	CAGCGCCAATGGGCTTTCGA	CGTCTCACACCG	GTTTCGAGACG	AGCCGCTTAAGAGCCTGTCG	CAGCGCCAATGGGCTTTCGACGTCTCACACCGATCGGTACCTCTTCACATATGTTTCGAGACGAGCCGCTTAAGAGCCTGTCG
18	NO-TARGET_10214	AGTTCCCAGAAATATATTGC	NO-TARGET	CAGCGCCAATGGGCTTTCGA	CGTCTCACACCG	GTTTCGAGACG	AGCCGCTTAAGAGCCTGTCG	CAGCGCCAATGGGCTTTCGACGTCTCACACCGAGTTCCCAGAAATATATTGCGTTTCGAGACGAGCCGCTTAAGAGCCTGTCG
19	NO-TARGET_5253	ACTAGAGTCATGATCAGCGA	NO-TARGET	CAGCGCCAATGGGCTTTCGA	CGTCTCACACCG	GTTTCGAGACG	AGCCGCTTAAGAGCCTGTCG	CAGCGCCAATGGGCTTTCGACGTCTCACACCGACTAGAGTCATGATCAGCGAGTTTCGAGACGAGCCGCTTAAGAGCCTGTCG
20	NO-TARGET_4293	ACCCGATAATAGCTACTGGT	NO-TARGET	CAGCGCCAATGGGCTTTCGA	CGTCTCACACCG	GTTTCGAGACG	AGCCGCTTAAGAGCCTGTCG	CAGCGCCAATGGGCTTTCGACGTCTCACACCGACCCGATAATAGCTACTGGTGTTTCGAGACGAGCCGCTTAAGAGCCTGTCG
