# Supplementary material for: RNF19B confers tumor resistance to CAR T cells
Source: Research Square preprint supplement (doi:10.21203/rs.3.rs-7847831/v1), 2025-10-23
Supplement: Supplementary file 4 [file fa5b622d57c5e10e9ad28a65.xlsx]

## Sheet: Huh-7_Gene
id	num	neg|score	neg|p-value	neg|fdr	neg|rank	neg|goodsgrna	neg|lfc	pos|score	pos|p-value	pos|fdr	pos|rank	pos|goodsgrna	pos|lfc
NO-TARGET	20	0.0010396	0.0093175	0.181025	1	15	-0.90273	1	1	0.999995	72	0	-0.90273
IGF1R	2	0.0011526	0.002483	0.178777	2	2	-2.5633	0.99885	0.99881	0.999995	71	0	-2.5633
FASLG	2	0.002753	0.0055406	0.181025	3	2	-3.2506	0.99725	0.9973	0.999995	70	0	-3.2506
FOXA3	2	0.0050392	0.010057	0.181025	4	2	-1.6262	0.99496	0.99478	0.999995	69	0	-1.6262
KIAA0232	2	0.010374	0.020079	0.289137	5	2	-2.4056	0.98963	0.98933	0.999995	68	0	-2.4056
AKT1	2	0.013041	0.024495	0.293945	6	2	-1.9873	0.98696	0.98646	0.999995	67	0	-1.9873
IRS4	2	0.018433	0.033878	0.31857	7	2	-1.5265	0.84636	0.8465	0.999995	55	0	-1.5265
ARAP1	2	0.01929	0.035397	0.31857	8	2	-1.9704	0.98071	0.98017	0.999995	66	0	-1.9704
SCAF11	2	0.024777	0.045409	0.363269	9	2	-1.8205	0.97522	0.97458	0.999995	65	0	-1.8205
NR1I2	2	0.03316	0.060097	0.432698	10	2	-0.99477	0.96684	0.96666	0.999995	64	0	-0.99477
IFNB1	2	0.05648	0.10007	0.655036	11	2	-2.8832	0.94352	0.94389	0.999995	63	0	-2.8832
RPRD2	2	0.065625	0.11569	0.668871	12	2	-1.493	0.93438	0.93509	0.999995	62	0	-1.493
LRRC58	2	0.068825	0.12077	0.668871	13	2	-1.7341	0.93117	0.93185	0.999995	61	0	-1.7341
UBALD2	2	0.075455	0.13196	0.678649	14	2	-1.1077	0.92454	0.9256	0.999995	60	0	-1.1077
KANK4	2	0.11737	0.19824	0.921054	15	2	-1.4664	0.88263	0.88362	0.999995	59	0	-1.4664
FOXA2	2	0.12598	0.21108	0.921054	16	2	-1.0209	0.87402	0.87512	0.999995	58	0	-1.0209
TNFSF10	2	0.1304	0.21747	0.921054	17	2	-1.707	0.8696	0.87077	0.999995	57	0	-1.707
MEX3B	2	0.14412	0.23765	0.95062	18	2	-1.1068	0.85588	0.85611	0.999995	56	0	-1.1068
IRX5	2	0.16851	0.27284	0.997297	19	2	-0.87325	0.83149	0.83163	0.999995	54	0	-0.87325
IFNL2	2	0.17879	0.28739	0.997297	20	2	-0.76802	0.82121	0.82115	0.999995	53	0	-0.76802
ZBTB7B	2	0.3209	0.38882	0.997297	21	1	-0.76902	0.68792	0.68914	0.999995	45	1	-0.76902
TRIB1	2	0.37082	0.42334	0.997297	22	1	-0.46161	0.64517	0.64899	0.999995	41	1	-0.46161
KLF7	2	0.38057	0.42993	0.997297	23	1	-0.74839	0.78851	0.78794	0.999995	52	0	-0.74839
SPRY2	2	0.39985	0.44426	0.997297	24	1	-0.17622	0.52628	0.54897	0.999995	38	1	-0.17622
SLC39A2	2	0.40938	0.45138	0.997297	25	1	-0.041716	0.46493	0.5026	0.999995	35	1	-0.041716
TNFRSF10A	2	0.4375	0.47234	0.997297	26	1	-1.4523	0.70156	0.7019	0.999995	46	1	-1.4523
PITX1	2	0.46493	0.49344	0.997297	27	1	-0.4515	0.65972	0.66261	0.999995	42	1	-0.4515
FOXL2NB	2	0.49168	0.51375	0.997297	28	1	-0.64021	0.7828	0.78207	0.999995	51	0	-0.64021
LHX4	2	0.50045	0.52097	0.997297	29	1	-0.12532	0.56782	0.58246	0.999995	39	1	-0.12532
GSK3B	2	0.50914	0.52814	0.997297	30	1	-0.83991	0.77701	0.77657	0.999995	50	0	-0.83991
HDGF	2	0.51775	0.53486	0.997297	31	1	-0.43158	0.50045	0.52903	0.999995	37	1	-0.43158
MYC	2	0.55143	0.56243	0.997297	32	1	-0.25691	0.77114	0.77092	0.999995	49	0	-0.25691
LRIG1	2	0.55966	0.56963	0.997297	33	1	0.64687	0.3411	0.4157	0.880311	34	1	0.64687
FOXO6	2	0.63777	0.64004	0.997297	34	1	0.69912	0.25849	0.36363	0.84457	31	1	0.69912
GBX1	2	0.64517	0.64655	0.997297	35	1	-0.085113	0.72793	0.72765	0.999995	48	0	-0.085113
CUL3	2	0.65972	0.66083	0.997297	36	1	0.062448	0.67397	0.6757	0.999995	43	1	0.062448
SMAD1	2	0.67397	0.67459	0.997297	37	1	-0.031894	0.72145	0.72122	0.999995	47	0	-0.031894
ATF5	2	0.68098	0.68169	0.997297	38	1	0.057747	0.68098	0.68253	0.999995	44	1	0.057747
GPRC5A	2	0.73433	0.73439	0.997297	39	0	0.40863	0.48284	0.51536	0.999995	36	1	0.40863
BMPR2	2	0.75308	0.75308	0.997297	40	0	0.83659	0.2796	0.37656	0.847268	32	1	0.83659
PRDM16	2	0.75917	0.75911	0.997297	41	0	0.28937	0.61514	0.62257	0.999995	40	1	0.28937
HNRNPUL2	2	0.76519	0.76491	0.997297	42	0	0.71591	0.3209	0.40259	0.878385	33	1	0.71591
ARID1A	2	0.7828	0.78207	0.997297	43	0	1.3521	0.078637	0.13702	0.514694	19	1	1.3521
FOXI3	2	0.78851	0.78794	0.997297	44	0	0.29868	0.21149	0.33264	0.798333	30	2	0.29868
ACVR1C	2	0.79972	0.79916	0.997297	45	0	0.3824	0.20028	0.31722	0.787584	29	2	0.3824
PAX5	2	0.83149	0.83163	0.997297	46	0	1.5017	0.16851	0.27284	0.70158	28	2	1.5017
SLCO4C1	2	0.84148	0.84151	0.997297	47	0	0.44965	0.15852	0.25918	0.69114	27	2	0.44965
IMPA2	2	0.84636	0.8465	0.997297	48	0	0.63397	0.15364	0.25213	0.69114	26	2	0.63397
PTPRJ	2	0.8651	0.86616	0.997297	49	0	0.76858	0.1349	0.22394	0.644935	25	2	0.76858
ACVRL1	2	0.8696	0.87077	0.997297	50	0	0.52461	0.1304	0.21747	0.644935	24	2	0.52461
MYPOP	2	0.88682	0.88763	0.997297	51	0	1.1501	0.11318	0.19145	0.599327	23	2	1.1501
CMTR1	2	0.89498	0.89547	0.997297	52	0	1.9366	0.042743	0.076764	0.502453	11	2	1.9366
EOMES	2	0.89894	0.89952	0.997297	53	0	1.0277	0.10106	0.17305	0.566334	22	2	1.0277
TTI1	2	0.91037	0.91091	0.997297	54	0	1.3893	0.08963	0.15517	0.532014	21	2	1.3893
BMP2	2	0.91761	0.91847	0.997297	55	0	1.3951	0.08239	0.14297	0.514694	20	2	1.3951
CFLAR	2	0.92454	0.9256	0.997297	56	0	1.1245	0.075455	0.13196	0.514694	18	2	1.1245
FOXC1	2	0.93117	0.93185	0.997297	57	0	1.4557	0.068825	0.12077	0.51149	17	2	1.4557
SLC6A14	2	0.93438	0.93509	0.997297	58	0	1.424	0.065625	0.11569	0.51149	16	2	1.424
SERPINB9	2	0.9375	0.93811	0.997297	59	0	0.9386	0.0625	0.11035	0.51149	15	2	0.9386
BMPR1B	2	0.94055	0.94084	0.997297	60	0	1.3694	0.059452	0.1053	0.51149	14	2	1.3694
MYRF	2	0.94352	0.94389	0.997297	61	0	1.9712	0.030626	0.05563	0.40054	10	2	1.9712
ILKAP	2	0.94642	0.94693	0.997297	62	0	1.3001	0.053584	0.095179	0.51149	13	2	1.3001
RBMS1	2	0.94924	0.94948	0.997297	63	0	1.3967	0.050764	0.090343	0.51149	12	2	1.3967
SLC26A3	2	0.97118	0.9706	0.997297	64	0	2.2817	0.028816	0.052263	0.40054	9	2	2.2817
BHLHA15	2	0.97324	0.9727	0.997297	65	0	2.3033	0.026758	0.048926	0.40054	8	2	2.3033
HOXC11	2	0.98239	0.98201	0.997297	66	0	1.8986	0.017614	0.032399	0.333248	7	2	1.8986
PRDM1	2	0.98399	0.98342	0.997297	67	0	2.6794	0.016013	0.029671	0.333248	6	2	2.6794
NRIP1	2	0.98551	0.98494	0.997297	68	0	2.1419	0.014489	0.026953	0.333248	5	2	2.1419
NR1D1	2	0.98963	0.98933	0.997297	69	0	2.338	0.0061633	0.011985	0.243975	3	2	2.338
ZBTB10	2	0.99306	0.99272	0.997297	70	0	2.5949	0.0069444	0.013554	0.243975	4	2	2.5949
GIGYF2	2	0.9958	0.99555	0.997297	71	0	2.1423	0.004201	0.0083483	0.243975	2	2	2.1423
RNF19B	2	0.99725	0.9973	0.997297	72	0	1.6367	0.002753	0.0055406	0.243975	1	2	1.6367

## Sheet: Huh-7_Counts
sgRNA	Gene	Input	Alone	Survivors
ACVR1C_CCTGCAGCAGCAGGCCCGGG	ACVR1C	7641.1	7729.8	10631.2
ACVR1C_CAGGCCCGGGCGGCTGCGAG	ACVR1C	4882.79	5444.93	6359.78
ACVRL1_GAGGCTGCTGAAGACAGGAG	ACVRL1	15640.4	17926.2	23920.4
ACVRL1_AGAGGCTGCTGAAGACAGGA	ACVRL1	7386.97	11336.1	15879.3
AKT1_CCCGGGGCGTCCCCACCGCG	AKT1	14894.3	80026.5	14469.9
AKT1_CGTCCCCACCGCGCGGCCGG	AKT1	12738.6	42952.8	13765.2
ARAP1_CCTGGGCATCCACCCTGTGA	ARAP1	12770.6	37610.8	13379.9
ARAP1_GCAAGATCAGTGGACACTGT	ARAP1	14901.8	95650.4	15851.7
ARID1A_CGCGCTCTGACTCTGGCTCC	ARID1A	7163.3	3635.74	3764.82
ARID1A_GACTCTGGCTCCCGGCGCCC	ARID1A	5241.69	1719.66	10051.7
ATF5_ACCCTAGGAGTGGGAAGGAA	ATF5	6102.93	4322.54	3512.52
ATF5_AGGAGTGGGAAGGAAAGGCT	ATF5	7944.28	4881.06	5798.02
BHLHA15_CGGCGGGCGCTGGGCAGCAG	BHLHA15	6446.23	809.725	3028.61
BHLHA15_CGGGCGCTGGGCAGCAGTGG	BHLHA15	5011.34	195.082	1247.71
BMP2_GGCGAGCCGCGCCGCGAAGG	BMP2	5428.95	1175.84	3603.19
BMP2_GCTCGCCGGGGATCCCCGAG	BMP2	6409.82	6106.34	11954.8
BMPR1B_TCACTAGTGGGAGCTGGAGA	BMPR1B	9093.83	4204.96	10947.5
BMPR1B_ATCACTAGTGGGAGCTGGAG	BMPR1B	7178.16	3919.02	8978.4
BMPR2_ACCACAGGCTAGAGACAGAC	BMPR2	5608.03	4326.55	3942.22
BMPR2_AGGCTAGAGACAGACAGGGC	BMPR2	7168.5	2745.85	8508.29
CFLAR_CAGTGTTTACTCCTAACGCG	CFLAR	10950.8	20983.4	36124.5
CFLAR_CTTGTGTCGACATCCACCCC	CFLAR	17929.1	40350	99738.1
CMTR1_TCCCAGGTTGAGAGGTGGAG	CMTR1	9152.53	5730.87	10483.3
CMTR1_GGACCTCCCAGGTTGAGAGG	CMTR1	12416.9	2307.58	16653.9
CUL3_CGGAGAGTGAGAGATGCCGG	CUL3	4108.5	2691.07	2006.59
CUL3_CCCCGGCATCTCTCACTCTC	CUL3	2148.99	928.645	1217.16
EOMES_TTCCCCTTCCTCCCGCGCCG	EOMES	11210.1	7693.72	13890.4
EOMES_GCAGGTGGGTAGCCCCGGCG	EOMES	9683.83	2614.9	5254.98
FASLG_TTGTGGGCGGAAACTTCCAG	FASLG	13785.6	137915	11738
FASLG_GCTTCAGCTGCAAAGTGAGT	FASLG	13040.3	34462.7	3982.63
FOXA2_AGAGGGAGCGCGAGAGAGGG	FOXA2	9141.38	18909.6	12660.4
FOXA2_CGGAGGCGGTAGTTGGAAGT	FOXA2	15502.2	50760.1	16448.9
FOXA3_GTCTCCTGGCGATCCCGCAG	FOXA3	21915.7	108420	39031.9
FOXA3_ATCGCCAGGAGACAGACCTC	FOXA3	23990.4	176117	46027.4
FOXC1_GCGCGCGAGAGACCGAGAAA	FOXC1	5228.32	1783.8	4253.65
FOXC1_CAGCCGCTTAAGGAAGCATT	FOXC1	6924.03	2429.17	6864.39
FOXI3_GTTTGGGCGCGCGGGCAGGT	FOXI3	11849.9	10649.4	11418.6
FOXI3_GGCTCCGGGTTTGGGCGCGC	FOXI3	4436.94	2939.6	3476.05
FOXL2NB_GGCGCACTAGGGACTCCAGG	FOXL2NB	7665.63	8360.48	3585.45
FOXL2NB_ATACGAATCAGAACAGAGCG	FOXL2NB	6483.38	6826.54	5819.7
FOXO6_GCGGAATCCTCAGCCAGCCC	FOXO6	8542.46	9807.56	7278.32
FOXO6_CGGGCGCTGAGCTCCCAGCT	FOXO6	7208.63	2664.34	8760.59
GBX1_GGAAGATGGATGAGTCCGGA	GBX1	13127.3	17860.7	14066.8
GBX1_AGGAAGATGGATGAGTCCGG	GBX1	12020.8	20925.9	21188.4
GIGYF2_TGTCGTGGGAGACTGGAGAG	GIGYF2	9508.47	3107.95	12526.4
GIGYF2_TCGTGGGAGACTGGAGAGTG	GIGYF2	11540.8	7167.27	31523.9
GPRC5A_GAGGGGTGAGCAGAGGGACA	GPRC5A	11408.5	15097.5	26963.8
GPRC5A_CATAACAGCATGAAGTGCCG	GPRC5A	8164.98	6922.75	6157.74
GSK3B_GCGCTGGGCGGTGTAAGGCT	GSK3B	4312.1	1643.5	1359.08
GSK3B_CCAGACGCCTGTTACGCGGG	GSK3B	4782.47	3518.16	1196.46
HDGF_CAACCTCGCGCTCCCTCCCG	HDGF	3962.85	2290.21	598.232
HDGF_CTGCACGCATCAAACCGCCG	HDGF	8487.47	10179	18539.3
HNRNPUL2_AGCCGCAGTGGAGTCCAAGA	HNRNPUL2	8321.77	8707.88	21353
HNRNPUL2_GCCGCAGTGGAGTCCAAGAC	HNRNPUL2	6517.57	12620.2	12392.4
HOXC11_AGCACTTCGCAGACGTAGGA	HOXC11	4788.42	2328.96	9794.44
HOXC11_GCACTTCGCAGACGTAGGAG	HOXC11	10308.8	4695.34	13696.3
IFNB1_ATGACATAGGAAAACTGAAA	IFNB1	3534.84	3928.37	505.589
IFNB1_AAATTCCTCTGAATAGAGAG	IFNB1	2936.66	2501.33	302.565
IFNL2_CACAGCCTCAGGTAAGACAC	IFNL2	13203.1	11344.2	9535.24
IFNL2_CTACAGGAAGGTATGTTCCC	IFNL2	8998.71	15324.6	5833.5
IGF1R_TCCGCACGTCTTGGGGAACC	IGF1R	14710	99200.7	17285.6
IGF1R_GCTCCGCTCCGCACGTCTTG	IGF1R	15503.6	114239	17031.4
ILKAP_GTCCGCCCGGCTCGCAGTCG	ILKAP	11284.4	13057.1	33349.2
ILKAP_CGCCCCGACTGCGAGCCGGG	ILKAP	8677.7	8520.82	18684.1
IMPA2_GAGCTCTGCGAGGGGCGAGG	IMPA2	8929.61	6741.03	11123
IMPA2_GCTCTGCGAGGGGCGAGGTG	IMPA2	9828.73	6612.75	8965.59
IRS4_TCGTGCGCTCAGAGTGGAGT	IRS4	14774.7	38611.6	28370.2
IRS4_GGGCTGGGGCGGGCAGACGA	IRS4	21810.9	140267	20335.9
IRX5_GAGAGAGCCGAGGAGGAAGA	IRX5	4622.71	1541.95	1113.68
IRX5_GACTGGCAGGAGCTTCTGGG	IRX5	4686.61	2903.52	1082.14
KANK4_GGACTTTGGTGTGTAGGAAG	KANK4	10651.3	12084.4	7274.38
KANK4_AGAATTGCGAAACCGAGGGG	KANK4	5527.78	11063.6	2227.35
KIAA0232_GAGCGCGCCCCTGGTTGGCG	KIAA0232	8919.2	24573.7	5231.32
KIAA0232_ATATGGAGCGCGCCCCTGGT	KIAA0232	10231.5	28178.7	4334.47
KLF7_GGGAAGACTACAAACTAGCA	KLF7	6981.25	10665.4	9365.72
KLF7_CAAACTAGCAAGGATGGGGT	KLF7	7421.15	14382.6	5212.6
LHX4_TCAAAACGCCCGGGTGACCG	LHX4	5769.28	3881.6	6465.24
LHX4_GGTGACCGCGGCCTCCCGGG	LHX4	6404.62	8808.1	3889.98
LRIG1_TGTTGCAAAGCATCCAACGT	LRIG1	7314.15	10992.8	6286.85
LRIG1_CGCGGAGCGCGGAGCCTAGG	LRIG1	2692.93	360.769	1438.91
LRRC58_TCCGCGCCCCGCGCCTCGTG	LRRC58	13035.1	26966.8	6165.63
LRRC58_GCATGGGCTGCGCAGAACTG	LRRC58	9354.65	6862.62	2473.74
MEX3B_AGAGGCTCAGTCAAGAGGCG	MEX3B	4753.49	2477.28	909.667
MEX3B_GCTGCAGAGGCTCAGTCAAG	MEX3B	5860.68	2125.86	1153.1
MYC_CCCCCGAGCTGTGCTGCTCG	MYC	21576.8	86311.9	60751.6
MYC_CTCCTGCCTCGAGAAGGGCA	MYC	27994.1	49914.3	45267.5
MYPOP_GAATGAAACCCTGGCGGTAA	MYPOP	9720.24	6680.9	16735.7
MYPOP_GGTAGGTGGGAATGAAACCC	MYPOP	5779.69	2465.25	4463.58
MYRF_GCCTGCAGGAGTCGGGAGCG	MYRF	11809	5374.11	12035.6
MYRF_ACCACGCTCCCGACTCCTGC	MYRF	21346.5	4819.6	30841
NO-TARGET_AATCGCAGGTATCCCAGAGC	NO-TARGET	9977.35	33653	6965.9
NO-TARGET_GATCCAGCAATATTTCTTAA	NO-TARGET	11357.3	26503.1	10903.2
NO-TARGET_CCTAAACTCAGACGCACTAC	NO-TARGET	11046.6	28650.4	14233.4
NO-TARGET_CGAACTTAATCCCGTGGCAA	NO-TARGET	8309.13	15233.8	10320.7
NO-TARGET_ACTAGAGTCATGATCAGCGA	NO-TARGET	11709.5	44917	32620.9
NO-TARGET_GAGAGTGCGCCTTGATAGTA	NO-TARGET	11688.7	50415.4	14485.7
NO-TARGET_ACAGCGCTCTCGTGTACTAT	NO-TARGET	11980	75013.1	11946.9
NO-TARGET_ATACGCATGATTGCAAGAGG	NO-TARGET	11061.5	22091.1	15854.6
NO-TARGET_CGCATAAGTCGATAGACACA	NO-TARGET	6960.44	23447.3	6463.27
NO-TARGET_ACCCGATAATAGCTACTGGT	NO-TARGET	13068.6	42849.9	19793.9
NO-TARGET_ATGCCTTAGACTTAACCTCG	NO-TARGET	12085.5	39232.9	15008
NO-TARGET_AGAAACTGAACTATCCTACT	NO-TARGET	13536.7	25698.7	15196.3
NO-TARGET_AAATTGGCTTTCGTTCGTGC	NO-TARGET	10543.6	48082.4	8559.54
NO-TARGET_AGTTCCCAGAAATATATTGC	NO-TARGET	8807.74	16929.4	8281.61
NO-TARGET_GAACGTCCAAGCAAGGGAGC	NO-TARGET	1060.38	3502.13	1817.36
NO-TARGET_ACTAGCCTGTTCGCGAGTAG	NO-TARGET	14.1185	374.13	317.349
NO-TARGET_ATCGGTACCTCTTCACATAT	NO-TARGET	9.66006	394.173	308.479
NO-TARGET_CTCCTTACGTCGGGCATTAA	NO-TARGET	11.8893	311.33	273.984
NO-TARGET_AAACGAGATCGAGAAAGGTA	NO-TARGET	5.94465	371.458	272.013
NO-TARGET_CATAAGGTTAACTGCGTGGA	NO-TARGET	14.1185	334.045	258.215
NR1D1_GTTGGAAAAGTGTGTCACTG	NR1D1	9454.96	4162.2	13938.7
NR1D1_GCAGGTACCATGTGATCCCA	NR1D1	22586.7	23307	157947
NR1I2_TTTCAGTCCAAGTCAGATGT	NR1I2	19774.1	140132	77580.9
NR1I2_TTGGGACTTAGGAGGGGCAA	NR1I2	16075.8	140038	56733.4
NRIP1_CTCCGCCGCCGAGTCCGCCG	NRIP1	6327.34	1146.44	4312.79
NRIP1_CTGAAGAGCTGAATGGCGTG	NRIP1	8916.23	606.626	2738.86
PAX5_GCGCTAGCCAGCGCACCTAC	PAX5	4503.07	110.903	647.509
PAX5_GCCAGCGCACCTACGGGAAG	PAX5	4563.26	2140.56	2845.3
PITX1_GCGGCGGCGCGGGCGGCTTG	PITX1	8744.58	6130.39	2129.78
PITX1_GCGAGCGAGCGAGGGAGCGC	PITX1	6962.67	1106.36	1464.53
PRDM1_ATGCGAAGAGAGGAAGCTCT	PRDM1	3305.97	284.606	2706.33
PRDM1_TGAAATACACATGCGAAGAG	PRDM1	2588.89	805.716	3302.59
PRDM16_CCCCCAATCCCGCGCCGAGG	PRDM16	10762	9772.82	8799.03
PRDM16_GCGGCGGCGGCGCGACGATG	PRDM16	11710.2	3173.43	4659.7
PTPRJ_GAGGGGATCCGCGGCCGGCT	PTPRJ	7787.49	2737.83	4743.47
PTPRJ_TCGCTTCCTCCCGCCCCGGC	PTPRJ	5990.72	2566.8	3965.87
RBMS1_ACTCAGCCCTCACCTCCAGC	RBMS1	13746.3	6203.88	14538.9
RBMS1_CCGAGCCCGGGACCCGCTGG	RBMS1	7675.29	2530.72	6674.18
RNF19B_GCCCAGCGCACTCCTAGACC	RNF19B	14999.8	35264.5	111832
RNF19B_ACTCCTAGACCGGGGCGCAA	RNF19B	21026.2	109042	297964
RPRD2_GGACGGGAACACCAGCTGCT	RPRD2	9785.64	19505.6	5900.52
RPRD2_GCTCTTCTGGAGGTACGGAC	RPRD2	7797.89	8666.46	3289.78
SCAF11_ACCTTAGCGCGCCGACAGCG	SCAF11	11710.2	24657.9	7951.45
SCAF11_TCGGCGCGCTAAGGTGACGA	SCAF11	6843.78	18492.7	4097.94
SERPINB9_TGGTGGCCGAGGTCAGAGCT	SERPINB9	17949.1	26361.5	51425.3
SERPINB9_CCTGCTCCCAGCTCTGACCT	SERPINB9	18100	51547.1	85060.3
SLC26A3_TTAATCTCACAAGGAACTTG	SLC26A3	4065.4	287.279	1815.39
SLC26A3_ACTGGTGGTTTAATCTCACA	SLC26A3	5310.8	1257.35	4212.26
SLC39A2_GAGGAGGAGAAGACGCCACT	SLC39A2	14147.5	20896.5	9015.85
SLC39A2_CCCTGCCAGGCACAGCCCAG	SLC39A2	15733.3	8137.33	16231.1
SLC6A14_GCTACATGTAGGCTTATCTG	SLC6A14	5564.19	3866.9	12588.5
SLC6A14_GGCAGGAGATTGCTACATGT	SLC6A14	7392.91	8924.34	17882.9
SLCO4C1_AGAGTGCGCTGGAGGCTGGA	SLCO4C1	11574.2	11276	14559.6
SLCO4C1_AGCTGCGAGCTGGAGTAGGA	SLCO4C1	11824.7	7851.39	10078.3
SMAD1_CGGGTGAGCGTGTGAGCGGG	SMAD1	5317.49	3675.83	3907.72
SMAD1_GGGTGAGCGTGTGAGCGGGC	SMAD1	8240.03	6101	4981.98
SPRY2_TGCCTCCTCCGGAAAGGCGA	SPRY2	7253.22	2323.62	4807.54
SPRY2_CTGCCTCCTCCGGAAAGGCG	SPRY2	7820.19	10376.8	3613.04
TNFRSF10A_AGCGGCAAGGGCGGTCACAG	TNFRSF10A	2924.77	1587.38	172.472
TNFRSF10A_GAAGCTGAGAGCGGCAAGGG	TNFRSF10A	3931.64	2223.4	2621.58
TNFSF10_TTGAGACAAGAGCTGTCCCT	TNFSF10	10269.4	16833.2	4492.16
TNFSF10_GTCCCTGGGCAGTAGGAAAG	TNFSF10	801.042	388.828	115.31
TRIB1_GGCCGGGCTGTGTAAACAGT	TRIB1	10420.2	22125.8	8916.31
TRIB1_TCCCAACTGTTTACACAGCC	TRIB1	10092.5	26257.3	30874.5
TTI1_AGCGGTCAAAGCTCTTTCCG	TTI1	10211.4	12952.9	22817.6
TTI1_GACCGCTCGAGCCTGCACAC	TTI1	11025.8	13248.2	47368.7
UBALD2_CGAACGTCCTTACGGGAGCC	UBALD2	12877.6	41157	15141.1
UBALD2_GCCAGCGCCCGGCTCCCGTA	UBALD2	10591.9	26468.4	13923.9
ZBTB10_GCGCAGCCCAGCCCCTTTCC	ZBTB10	9971.41	6679.56	23034.4
ZBTB10_GGCGCCAGGGGACCGGGAAA	ZBTB10	6649.83	1687.59	15912.8
ZBTB7B_GTGAGACAGCAGGACAGGTG	ZBTB7B	6221.08	13304.3	3490.83
ZBTB7B_GACAGGTGAGACAGCAGGAC	ZBTB7B	4439.91	2748.52	3322.3

## Sheet: U-343MG_Gene
id	num	neg|score	neg|p-value	neg|fdr	neg|rank	neg|goodsgrna	neg|lfc	pos|score	pos|p-value	pos|fdr	pos|rank	pos|goodsgrna	pos|lfc
2008-03-01	2	0.83892	0.83899	0.999975	123	0	0.36515	0.34478	0.34447	0.999237	52	0	0.36515	Resistance
AMOTL2	2	0.82109	0.82117	0.999975	119	0	0.1634	0.61526	0.61559	0.999237	87	0	0.1634	Resistance
ANXA2R	2	0.01258	0.023749	0.453596	8	2	-0.83914	0.98742	0.98703	0.999237	169	0	-0.83914	Susceptibility
ARHGAP42	2	0.36647	0.37257	0.999975	60	1	-0.30339	0.75671	0.75677	0.999237	108	0	-0.30339	Susceptibility
ARID3A	2	0.96054	0.96064	0.999975	154	0	0.6836	0.24028	0.24153	0.999237	37	0	0.6836	Resistance
ARID5B	2	0.8188	0.81879	0.999975	118	0	0.15149	0.63185	0.63264	0.999237	91	0	0.15149	Resistance
BAG2	2	0.66077	0.66179	0.999975	97	0	-0.16104	0.8188	0.81879	0.999237	120	0	-0.16104	Susceptibility
BAHCC1	2	0.51189	0.51202	0.999975	75	0	0.50646	0.050692	0.052357	0.999237	9	1	0.50646	Resistance
BSX	2	0.53429	0.53343	0.999975	78	0	0.17736	0.28666	0.28691	0.999237	43	0	0.17736	Resistance
C4orf36	2	0.4496	0.45012	0.999975	67	1	-0.39964	0.87938	0.88056	0.999237	132	0	-0.39964	Susceptibility
CAPN6	2	0.42527	0.42684	0.999975	65	1	-0.010586	0.42527	0.42507	0.999237	62	0	-0.010586	Susceptibility
CASP1	2	0.0027776	0.0055472	0.244079	4	2	-1.2966	0.99722	0.99728	0.999237	174	0	-1.2966	Susceptibility
CASP8	2	0.0080917	0.015615	0.453596	6	2	-1.3149	0.97326	0.97276	0.999237	165	0	-1.3149	Susceptibility
CASZ1	2	0.89569	0.89642	0.999975	137	0	0.40423	0.38356	0.38286	0.999237	56	0	0.40423	Resistance
CBFA2T2	2	0.00065924	0.0014005	0.244079	1	2	-1.306	0.99934	0.99924	0.999237	176	0	-1.306	Susceptibility
CCND1	2	0.25434	0.27735	0.957121	51	1	-0.19862	0.49667	0.49623	0.999237	70	0	-0.19862	Susceptibility
CCNE2	2	0.053398	0.094842	0.596147	28	2	-0.85936	0.9466	0.94708	0.999237	153	0	-0.85936	Susceptibility
CEBPA	2	0.082029	0.14117	0.63709	39	1	-0.59093	0.79506	0.79472	0.999237	114	0	-0.59093	Susceptibility
CEBPB	2	0.29576	0.31135	0.999975	54	1	-0.54168	0.90086	0.90144	0.999237	138	0	-0.54168	Susceptibility
CEP170	2	0.99525	0.99497	0.999975	172	0	1.1973	0.076843	0.078095	0.999237	13	1	1.1973	Resistance
CFLAR	2	0.99995	0.99998	0.999975	176	0	1.8194	4.57e-05	6.48e-05	0.011404	1	2	1.8194	Resistance
CLIP1	2	0.17779	0.21506	0.841111	45	1	-0.62856	0.89217	0.8929	0.999237	136	0	-0.62856	Susceptibility
CMTR2	2	0.9187	0.91959	0.999975	141	0	0.53581	0.29576	0.29609	0.999237	44	0	0.53581	Resistance
CNNM4	2	0.73212	0.73205	0.999975	105	0	0.24881	0.34039	0.34012	0.999237	51	0	0.24881	Resistance
CUL3	2	0.068022	0.11943	0.61824	34	2	-0.72907	0.93198	0.93274	0.999237	146	0	-0.72907	Susceptibility
DCUN1D5	2	0.46156	0.46191	0.999975	68	1	-0.045485	0.49283	0.49224	0.999237	69	0	-0.045485	Susceptibility
DOCK9	2	0.50431	0.50444	0.999975	74	0	-0.11023	0.62526	0.6261	0.999237	89	0	-0.11023	Susceptibility
EGFR	2	0.071642	0.1256	0.622553	35	2	-0.80213	0.92768	0.92856	0.999237	145	0	-0.80213	Susceptibility
EGR3	2	0.81417	0.8142	0.999975	117	0	0.15613	0.60174	0.60165	0.999237	85	0	0.15613	Resistance
ERBB3	2	0.029454	0.053464	0.57365	14	2	-0.69041	0.97055	0.97007	0.999237	164	0	-0.69041	Susceptibility
ERC1	2	0.59488	0.59454	0.999975	85	0	-0.063867	0.64485	0.64534	0.999237	92	0	-0.063867	Susceptibility
ETV1	2	0.75135	0.75155	0.999975	108	0	0.038528	0.6975	0.69809	0.999237	99	0	0.038528	Resistance
EYA4	2	0.61526	0.61559	0.999975	88	0	0.037723	0.53429	0.53343	0.999237	77	0	0.037723	Resistance
FAM49A	2	0.6119	0.61214	0.999975	87	0	-0.17247	0.79993	0.79948	0.999237	115	0	-0.17247	Susceptibility
FAS	2	0.0027009	0.0054476	0.244079	3	2	-1.6994	0.9886	0.98826	0.999237	170	0	-1.6994	Susceptibility
FASLG	2	0.0625	0.11032	0.606771	32	2	-0.6166	0.9375	0.93818	0.999237	148	0	-0.6166	Susceptibility
FASN	2	0.91242	0.91295	0.999975	140	0	0.39644	0.41705	0.41727	0.999237	60	0	0.39644	Resistance
FGF9	2	0.83012	0.83017	0.999975	122	0	0.28504	0.45759	0.45759	0.999237	65	0	0.28504	Resistance
FLG	2	0.75671	0.75677	0.999975	110	0	0.17679	0.50049	0.50017	0.999237	71	0	0.17679	Resistance
FNDC3B	2	0.31826	0.33069	0.999975	57	1	-0.48133	0.88859	0.88956	0.999237	134	0	-0.48133	Susceptibility
FOXD1	2	0.55975	0.5593	0.999975	80	0	0.18681	0.2729	0.27407	0.999237	41	0	0.18681	Resistance
FOXD4L6	2	0.75937	0.75944	0.999975	111	0	0.46739	0.20212	0.20367	0.999237	31	0	0.46739	Resistance
FOXF1	2	0.89394	0.8945	0.999975	136	0	0.62747	0.16302	0.16411	0.999237	26	0	0.62747	Resistance
FOXO4	2	0.88859	0.88956	0.999975	134	0	0.31764	0.4851	0.48446	0.999237	68	0	0.31764	Resistance
FXR1	2	0.49283	0.49224	0.999975	72	0	-0.19169	0.71507	0.71481	0.999237	103	0	-0.19169	Susceptibility
GBX2	2	0.63185	0.63264	0.999975	93	0	-0.1749	0.81183	0.8119	0.999237	117	0	-0.1749	Susceptibility
GLIS3	2	0.88311	0.8841	0.999975	131	0	0.27046	0.51941	0.51895	0.999237	74	0	0.27046	Resistance
GPR137B	2	0.85375	0.85392	0.999975	125	0	0.40325	0.32272	0.32296	0.999237	48	0	0.40325	Resistance
GRAMD1A	2	0.035283	0.063492	0.57365	18	2	-0.64897	0.96472	0.96464	0.999237	161	0	-0.64897	Susceptibility
GSK3B	2	0.70928	0.70927	0.999975	102	0	0.1721	0.4496	0.44946	0.999237	64	0	0.1721	Resistance
GSX1	2	0.82789	0.82798	0.999975	121	0	0.32181	0.36216	0.36178	0.999237	53	0	0.32181	Resistance
HAND2	2	0.98742	0.98703	0.999975	166	0	0.9354	0.15807	0.15937	0.999237	25	0	0.9354	Resistance
HEXIM1	2	0.0097316	0.018635	0.453596	7	2	-0.86446	0.99027	0.99001	0.999237	171	0	-0.86446	Susceptibility
HINT1	2	0.82337	0.82365	0.999975	120	0	0.17988	0.5845	0.58429	0.999237	83	0	0.17988	Resistance
HNRNPU	2	0.76201	0.76195	0.999975	112	0	0.024978	0.72932	0.72933	0.999237	105	0	0.024978	Resistance
HTR2A	2	0.54163	0.54093	0.999975	79	0	-0.27263	0.83455	0.83471	0.999237	125	0	-0.27263	Susceptibility
HTR7	2	0.62856	0.62916	0.999975	92	0	-0.08126	0.70928	0.70927	0.999237	102	0	-0.08126	Susceptibility
ID2	2	0.5775	0.57742	0.999975	83	0	-0.15334	0.78012	0.77982	0.999237	112	0	-0.15334	Susceptibility
ID3	2	0.56689	0.56677	0.999975	82	0	-0.030196	0.58101	0.58088	0.999237	82	0	-0.030196	Susceptibility
IFI44L	2	0.98063	0.98012	0.999975	162	0	0.98194	0.0975	0.099068	0.999237	17	1	0.98194	Resistance
ILKAP	2	0.94535	0.94574	0.999975	149	0	1.0201	0.029509	0.031614	0.927339	6	1	1.0201	Resistance
INSM2	2	0.74865	0.74865	0.999975	107	0	0.21268	0.42117	0.421	0.999237	61	0	0.21268	Resistance
IRX5	2	0.94017	0.94061	0.999975	148	0	0.5694	0.30029	0.30031	0.999237	45	0	0.5694	Resistance
ITGA3	2	0.51566	0.51561	0.999975	76	0	0.071397	0.37077	0.37035	0.999237	55	0	0.071397	Resistance
ITGA6	2	0.97668	0.97598	0.999975	161	0	0.82159	0.18757	0.18881	0.999237	28	0	0.82159	Resistance
ITGAV	2	0.48897	0.48825	0.999975	71	0	-0.41009	0.9059	0.90672	0.999237	139	0	-0.41009	Susceptibility
ITGB3	2	0.4046	0.40743	0.999975	64	1	-0.46147	0.91081	0.91144	0.999237	140	0	-0.46147	Susceptibility
ITGB5	2	0.62194	0.62269	0.999975	90	0	-0.13849	0.80948	0.80946	0.999237	116	0	-0.13849	Susceptibility
ITM2B	2	0.8619	0.86276	0.999975	127	0	0.22337	0.5775	0.57742	0.999237	81	0	0.22337	Resistance
JMJD1C	2	0.98282	0.98247	0.999975	164	0	0.94138	0.12299	0.12365	0.999237	21	0	0.94138	Resistance
KIAA0368	2	0.92175	0.92265	0.999975	142	0	0.60544	0.23082	0.23222	0.999237	35	0	0.60544	Resistance
KIAA1551	2	0.63512	0.63593	0.999975	94	0	0.46464	0.092358	0.093615	0.999237	16	1	0.46464	Resistance
KLF10	2	0.092358	0.1494	0.657346	40	1	-0.57251	0.81649	0.81644	0.999237	119	0	-0.57251	Susceptibility
KLF2	2	0.99131	0.99118	0.999975	167	0	1.0607	0.087201	0.088472	0.999237	15	1	1.0607	Resistance
KPNA3	2	0.91081	0.91144	0.999975	139	0	0.36507	0.46946	0.46918	0.999237	67	0	0.36507	Resistance
KRT16	2	0.87176	0.87277	0.999975	129	0	0.83305	0.055951	0.057322	0.999237	10	1	0.83305	Resistance
LAPTM4B	2	0.975	0.97436	0.999975	160	0	1.1588	0.024176	0.026391	0.927339	5	1	1.1588	Resistance
LATS2	2	0.74045	0.74071	0.999975	106	0	0.21764	0.39202	0.39127	0.999237	58	0	0.21764	Resistance
LRRC15	2	0.031339	0.056983	0.57365	15	2	-0.86824	0.96866	0.9684	0.999237	163	0	-0.86824	Susceptibility
MAML2	2	0.49667	0.49623	0.999975	73	0	-0.12913	0.60853	0.60873	0.999237	86	0	-0.12913	Susceptibility
MAP1B	2	0.77502	0.77496	0.999975	114	0	0.11212	0.62194	0.62269	0.999237	88	0	0.11212	Resistance
MAP1LC3C	2	0.024176	0.044144	0.57365	13	1	-0.66571	0.6794	0.68013	0.999237	96	0	-0.66571	Susceptibility
MAP3K3	2	0.52315	0.52248	0.999975	77	0	-0.063082	0.57044	0.57065	0.999237	80	0	-0.063082	Susceptibility
MBTD1	2	0.92475	0.92581	0.999975	144	0	0.58014	0.26828	0.26978	0.999237	40	0	0.58014	Resistance
MCF2	2	0.58797	0.58764	0.999975	84	0	0.13423	0.36647	0.36614	0.999237	54	0	0.13423	Resistance
MCOLN3	2	0.020908	0.038442	0.57365	11	2	-0.7443	0.97909	0.9786	0.999237	167	0	-0.7443	Susceptibility
MITD1	2	0.037343	0.06709	0.57365	19	2	-0.7614	0.96266	0.96267	0.999237	160	0	-0.7614	Susceptibility
MSI1	2	0.98618	0.98559	0.999975	165	0	1.1115	0.071642	0.072802	0.999237	12	1	1.1115	Resistance
MXI1	2	0.0019887	0.004052	0.244079	2	2	-1.1113	0.99801	0.99807	0.999237	175	0	-1.1113	Susceptibility
MYC	2	0.013468	0.025075	0.453596	9	1	-1.0568	0.89394	0.8945	0.999237	137	0	-1.0568	Susceptibility
MYCBP2	2	0.33158	0.34167	0.999975	58	1	-0.38046	0.83234	0.83264	0.999237	124	0	-0.38046	Susceptibility
MYO1D	2	0.059827	0.10599	0.606771	30	2	-0.50986	0.94017	0.94061	0.999237	150	0	-0.50986	Susceptibility
MYRF	2	0.7265	0.72625	0.999975	104	0	0.11619	0.55255	0.55169	0.999237	79	0	0.11619	Resistance
NDUFA4L2	2	0.88678	0.88766	0.999975	133	0	0.38419	0.3878	0.38716	0.999237	57	0	0.38419	Resistance
NFATC1	2	0.62526	0.6261	0.999975	91	0	-0.057612	0.67325	0.6739	0.999237	95	0	-0.057612	Susceptibility
NIPBL	2	0.92326	0.92432	0.999975	143	0	0.41878	0.43344	0.43349	0.999237	63	0	0.41878	Resistance
NKX2-1	2	0.99228	0.99204	0.999975	169	0	1.2833	0.04013	0.042399	0.999237	7	1	1.2833	Resistance

## Sheet: U-343MG_Counts
sgRNA	Gene	Input	Alone	Survivors
NO-TARGET_ATGCCTTAGACTTAACCTCG	NO-TARGET	8495.85	17687	18391
ITGB3_GGGATCTAGAGAAGCCGGAG	ITGB3	10185.4	12259.3	8315.42
ERBB3_TCCCTACTCCAGCCTCGCGC	ERBB3	7785.92	23851.3	13634.5
TRH_AGATTTCCGGAGGAGCAGGC	TRH	8229.01	10153.7	8067.62
PLAUR_CCGGGAAGGGAAGTTTGTGG	PLAUR	6712.88	9379.56	6193.48
CASZ1_CTCTGCTCTTTCACCTGCCG	CASZ1	8605.56	7827.35	10885.9
JMJD1C_TCCCCCGTCACAGGTGCTGA	JMJD1C	6831.08	6961.17	11528.2
KRT16_GCTGGGTGGGAACTCTGAGC	KRT16	7931.02	4660.58	12291.5
CEP170_GGCAAGCTGGAAAAGCGTGT	CEP170	8880.9	9453.8	22418.4
ITGAV_TCCACAGCAGCCTCCCGGGC	ITGAV	7123.41	10650.6	7871.09
CBFA2T2_CTTAATGGGAGCTGGTCTTG	CBFA2T2	8597.78	38694.3	16414.4
ID2_GCACGTCTATCAAGACGAGC	ID2	7383.88	18686.9	14917.6
FGF9_GCCAGAGCGCAGGACTTCCT	FGF9	10990.9	22851.5	29712.8
HINT1_CAGCGCGCTAGAGCGCCTCA	HINT1	9527.13	9944.81	11343.1
NDUFA4L2_GGAGAAAGTGAGCTAAGTTG	NDUFA4L2	7408.65	4346.77	5920.05
ZBP1_CTCCTGAAACCGAATCTGGC	ZBP1	7545.97	11937.5	7735.8
RRP1B_TCTGGGAGTGAGCGCGGCAG	RRP1B	7492.88	3561.76	3192.87
RAPGEF2_TGGAATGCAATTCTCAGTAT	RAPGEF2	8048.52	18759.1	18967.8
PREX2_TGCCGCCTCCGCCAACTCCG	PREX2	9898.02	18789.8	11662.1
ERC1_CGCCGCGTCACGCTCCCGGG	ERC1	6076.55	8528.22	6784.49
CCNE2_GCGGGCGCGCACTGAGAGCA	CCNE2	3992.05	1361.15	592.432
TNFSF10_CCTGGGCAGTAGGAAAGGGG	TNFSF10	6768.79	10584.3	4955.93
GSX1_GCGGCCGGGGCCTCTCAATA	GSX1	5627.8	3899.32	4132.79
TRIM33_ACGCAAGGAACTGGCTTCGA	TRIM33	11610.9	9502.31	17435.5
PRPS2_GAGGGGGAGCTGGAAAGTGC	PRPS2	7444.75	9211.27	14352.2
NFATC1_GCAGCAGGGGCGTGATGTCA	NFATC1	7693.9	4634.84	3836.57
KIAA1551_TGGTGGCACTAGGACCGCGG	KIAA1551	7868.73	1831.37	3920.59
TAF15_CGAGCCCTGAGGCCTTCCCA	TAF15	9500.94	18723.5	9246.79
PTPN14_TCCGTCCCCTCCCACTCGCA	PTPN14	6136.72	4824.9	2811.21
NRP1_ATTACAGGCGAGCCCAAGCG	NRP1	5276.73	7329.42	4911.78
SRSF2_GCGGCAGGGTCGTTACGAAG	SRSF2	6890.54	6922.56	10048.6
SEMA6A_TCCGACCCAAAGGAGAGCTG	SEMA6A	8130.62	13616.4	11383
NO-TARGET_AATCGCAGGTATCCCAGAGC	NO-TARGET	7033.51	16077.4	14795.1
TRIM25_AGTCGCCCATGAGCTGGCGA	TRIM25	8301.2	13933.2	12301.5
HINT1_GACCAGGAACTTCCCCAAGC	HINT1	7172.95	1923.43	2027.94
NO-TARGET_AGTTCCCAGAAATATATTGC	NO-TARGET	5865.63	13012.6	13049.2
FAM49A_GACGCGGCCGGTGACAGCGC	FAM49A	4270.93	4694.23	3832.3
PIM1_GGCCGGCCGAGGGAGGAGAG	PIM1	6482.13	2702.5	1730.3
BAG2_CGATAGGAACCTTCGCGTGG	BAG2	7723.63	6893.85	6071.01
HAND2_GAGGTAGCCAATCCTGGAAG	HAND2	8448.43	7041.35	12567.8
CFLAR_CTTGTGTCGACATCCACCCC	CFLAR	12090.8	32787.4	115654
FOXF1_GGCTGCACCTCTGCCGTCAT	FOXF1	8914.17	3635.01	6895.57
TFAP4_GCAATTCCTTACTCCGCGGA	TFAP4	8088.15	24139.4	19481.9
ZNF503_AGGGAGCTGCCCATTAAAAC	ZNF503	6685.98	7155.19	7966.51
SOX18_TGAGAAGAAAGGGAGCCCCC	SOX18	7411.49	5898.98	5958.5
SRSF9_AAGGGGTCGGCGGAGGCAAA	SRSF9	8175.92	11404.9	10914.4
GSK3B_CCAGACGCCTGTTACGCGGG	GSK3B	6172.11	7252.21	6686.23
LRRC15_GTACCCTGTAGTGTCAGCCC	LRRC15	3798.82	2574.8	1193.41
ZNF703_CTGAGGCCGGCTCCATCGGT	ZNF703	7599.76	7835.27	12130.6
SIX1_AGGCCGCACCGCCCAGAGCG	SIX1	8697.58	11603.9	13805.4
TSC22D3_TCCCAGCCTAAGGTTCAGGG	TSC22D3	6050.37	4982.3	10642.4
MXI1_GGACCGGTCAAAATAAAAGG	MXI1	2773.91	1690.8	740.541
ZNF703_TCCCGGCGAGAGCTGCGATT	ZNF703	8256.61	11497	16081.1
KLF10_GGGGGCGTCACTCAATCAGG	KLF10	8654.4	15909.1	7550.67
BAHCC1_CGGGGAGACACCGAGCGCCC	BAHCC1	5475.62	2727.25	1965.28
GPR137B_CGGGGGCGCGCGGGGCCGGT	GPR137B	7443.34	19871.8	22011.1
SLC4A1_AAGGGGCTCCCAGGGCCAGT	SLC4A1	8773.31	5473.31	6333.05
PITX1_GCGGCGGCGCGGGCGGCTTG	PITX1	7419.98	1649.22	3697.01
CASP1_GCATCAGGTAGTGTATCCAT	CASP1	8423.65	10059.6	4824.91
GBX2_TGGCGCCCGCAGCCCGCTCG	GBX2	7686.12	3570.67	3137.33
PITX1_GGGCGGCAGTGAGGGCGCGG	PITX1	6923.8	3196.47	4417.61
RAB3IL1_CACGGCGCTCGGAGGGAACC	RAB3IL1	7601.18	9258.79	3452.06
MYC_CTCCCCTCCTGCCTCGAGAA	MYC	7947.3	17306.9	4802.12
HTR2A_GGTAGCAACAGCCAGGAGGG	HTR2A	4127.95	3371.69	2852.51
NOTCH1_CCAGCCAGCCGGGGAAGAGA	NOTCH1	4013.99	731.556	1778.72
TCF12_GGCCGGCAGAGGGGGCGGGG	TCF12	4852.04	2376.81	3476.27
ZFPM2_GGCTGCATCCAAATCCAGTC	ZFPM2	8632.46	26202.4	12989.4
NO-TARGET_CGCATAAGTCGATAGACACA	NO-TARGET	5035.37	8095.62	6011.2
CMTR2_GGGTGAAAGGGAGAGGGACA	CMTR2	7519.78	5754.45	7140.52
LATS2_CGGCCGCATACCAGTCCGGG	LATS2	4437.27	2709.43	2546.32
DCUN1D5_GGTTAGCCTCTGCCACTCGT	DCUN1D5	9635.43	20070.8	14402.1
FAS_CGGTTTACGAGTGACTTGGC	FAS	6388.7	13259.1	7389.74
MYRF_ACGCTCCCGACTCCTGCAGG	MYRF	9270.9	8318.36	9773.71
MAML2_GCTCGTTCGAGGCTCCCTGG	MAML2	5096.94	1481.92	1045.3
LAPTM4B_AAGGCCCGGACCTCCACTCA	LAPTM4B	10414	9549.83	15239.5
SIX1_AGAGGCCGCACCGCCCAGAG	SIX1	9238.34	7834.28	9299.48
MYO1D_GGCTGGGGCGGGCTCCTCAG	MYO1D	6537.34	5826.71	3863.63
NIPBL_GCAGGAATGACTCCCTCCGC	NIPBL	6472.22	6393.94	8440.74
CUL3_CCCCGGCATCTCTCACTCTC	CUL3	3945.34	1072.09	733.42
SOX9_TGGCACTGGGCTGGGTGACG	SOX9	5954.1	3296.46	2368.31
MSI1_GCGAGCCCGGGCGCCCGCGG	MSI1	8614.76	34731.6	84773.4
PSME2_GAGGGGCTACCTACTGCTTG	PSME2	6498.41	3404.36	3501.9
RASA3_GCGGAGACCCGGGGGGCGCA	RASA3	5528.71	6161.31	6073.86
FXR1_GGCGGCACGTTGAGACCCCA	FXR1	6376.67	5116.93	5129.67
NO-TARGET_CCTAAACTCAGACGCACTAC	NO-TARGET	7178.62	16006.1	15454.5
SLC4A2_CAGGCACAGCCCGGCACCAG	SLC4A2	6325	3515.23	3202.84
EGR3_GAACATTAGAAAGCAGGAAG	EGR3	7615.33	7971.88	8323.96
PRDM1_TGAAATACACATGCGAAGAG	PRDM1	2828.41	3648.87	1815.75
NO-TARGET_ACAGCGCTCTCGTGTACTAT	NO-TARGET	7342.83	16235.8	13811.1
PDCD5_AGCTCGACCGCCTGAAATCG	PDCD5	8140.53	8037.22	9628.45
EGFR_GGAGGAGAATGCGAGGAGGA	EGFR	5251.96	7394.76	3335.28
MAP1B_CCCGGCACATCCTCACGCGG	MAP1B	6066.65	3460.79	3802.39
TRIM25_AGGACTGGGCGGGCCTCGCG	TRIM25	8747.12	15489.4	12169.1
FOXD1_GAGAAAATTCACCCGTAGGA	FOXD1	6019.93	2560.94	4100.03
OTOP2_AGAAAGATGGATCATGTGAG	OTOP2	5577.55	2538.17	4897.54
PCDH18_CTGATGGAGTCACCCAAGGA	PCDH18	9474.05	16267.5	11392.9
VGLL2_GCGAGGGACGCTTGTTGGAG	VGLL2	8929.03	4556.63	8946.3
RIMKLA_TTCCCCGGCACCGCCCGCCA	RIMKLA	9952.53	14161.9	16986.9
KLF10_GGGCAGAGGGAACACGCTGC	KLF10	9705.5	14618.3	13050.6
MCF2_CTTAGCCTGATTGAACCTTG	MCF2	9418.84	23206.9	18748.5
NO-TARGET_CATAAGGTTAACTGCGTGGA	NO-TARGET	7104.3	13420.4	11660.7
PQLC2_AGGAGCGCGGAGGCAGTTGG	PQLC2	11249.2	34267.3	38915.4
NIPBL_TAGTGTTTGGCGCCGGCGGA	NIPBL	6489.21	10691.2	13563.3
NO-TARGET_GATCCAGCAATATTTCTTAA	NO-TARGET	6031.96	13729.3	14309.5
ID2_GAGCGGGCGCTTCCATTGGT	ID2	9532.09	25963.8	24641.5
ZFPM2_CCCCGCACTTCGCCCGACCA	ZFPM2	10990.2	28226.8	22579.4
PQLC2_GACAACAGGCGCGGCCCCAG	PQLC2	7783.79	3037.1	4897.54
CEBPB_GTCCTCCCGGGGGTCTCGGG	CEBPB	4680.75	2637.17	1948.19
RUNX2_GGGGGAAAAGCCACAGTGGT	RUNX2	7663.47	2020.44	3264.07
HTR7_ATCCCGTCCCAGGAGCGCGA	HTR7	4074.87	3524.14	3540.35
ZNF503_AAAACCGGCACTGAGAGTCC	ZNF503	6096.37	4086.42	5199.45
RRP1B_TGGCAACCGAAAGGCAGCGC	RRP1B	7364.06	4787.29	7695.93
RNF19B_ACTCCTAGACCGGGGCGCAA	RNF19B	9961.02	17457.4	45547.5
MYC_CCCCCGAGCTGTGCTGCTCG	MYC	8802.33	22077.4	17226.1
NO-TARGET_ATACGCATGATTGCAAGAGG	NO-TARGET	6741.9	5226.81	6868.51
RGL1_GAAAGCCTTACATCACGGAG	RGL1	7885.01	13824.3	7754.31
KRT16_CACACAGCAGAGTTGATCCT	KRT16	7376.8	4816	5431.58
PIM1_GGGCCGGCCGAGGGAGGAGA	PIM1	3729.45	1757.12	974.096
MAML2_GTAATCGCAGCCAGGCACCG	MAML2	7482.97	3754.79	4169.81
IFI44L_GCCTGCCTACATACATACAA	IFI44L	7550.92	25084.8	55660.2
MBTD1_GCCTGCAGAGGGTCCCACGG	MBTD1	8621.13	7096.79	11572.4
DOCK9_AAAGCCGGTCTTTATCAGAG	DOCK9	7720.8	9460.73	10391.8
ARHGAP42_TGGGTGGGAGCGCGGCGGCG	ARHGAP42	5469.25	4994.18	4770.79
RGL1_GTGTGCTCACAAGCACAAAC	RGL1	8622.55	20376.7	16427.2
ARID5B_TCAGGCTCATCCCACACACT	ARID5B	7337.87	7251.22	7949.42
MYRF_GAGCGCCGCCTGCAGGAGTC	MYRF	6962.03	4831.83	4527.27
RRAS2_ACTCTCACGCACTCGCTCAC	RRAS2	6736.23	22427.8	12590.6
PPP1R14B_CCTCCCCTACCCCTGCCCGG	PPP1R14B	9018.22	17344.5	15495.8
KIAA0368_GCCACCTCCACACCAGAACT	KIAA0368	10170.5	6032.62	10360.4
CEBPA_CCTCTGTCCCCGGGCTGCGG	CEBPA	6932.3	3313.29	2993.49
MCOLN3_GTCACGAGTTAAAGCGGCGG	MCOLN3	4845.67	7431.38	4377.73
NO-TARGET_ACCCGATAATAGCTACTGGT	NO-TARGET	8398.17	16809	16972.6
CLIP1_GCGGACTCGAGGGGCCGGGC	CLIP1	3408.11	2023.41	1520.96
CEP170_CACACACAGACAATGAAAAG	CEP170	8832.06	11240.6	23361.2
ERC1_TCACGCTCCCGGGAGGCTGA	ERC1	8580.79	16312	17586.4
SOX10_TGGAGGAGCCCTGAGTGTTG	SOX10	9390.52	5719.8	4903.23
NKX2-1_GGGGATCGACTGCCTCCCGG	NKX2-1	6976.89	6852.28	13126.1
IFI44L_TGCCTGCCTACATACATACA	IFI44L	8907.8	9257.8	15253.7
NO-TARGET_ACTAGAGTCATGATCAGCGA	NO-TARGET	8973.62	22513.9	17381.3
NO-TARGET_ACTAGCCTGTTCGCGAGTAG	NO-TARGET	9530.67	16129.9	15104.2
MARCH8_GAAGGGGTGGAAGCACAGAA	2008-03-01	7578.53	17152.5	18532
NRP2_CCTGATTAAAGAGGCAGCCG	NRP2	6544.42	8378.74	15208.1
ZEB2_GATAGGTGGCGCGTGTTTCA	ZEB2	5841.56	4712.05	1932.53
TSC22D3_CTGTTTACAGTCCCAGCCTA	TSC22D3	8069.75	6824.56	20048.7
ZC3HAV1_ACCAACAGAGGCAGAGCGCA	ZC3HAV1	4141.4	3076.69	1582.19
AMOTL2_GTGCGCTGAGAGGTTATTTG	AMOTL2	6688.1	7553.14	7996.41
RASGEF1C_CGGAGGCCTGAACGCAGGGC	RASGEF1C	8958.05	23465.2	16978.3
MCOLN3_CCACCTGTGCTCCTGAAAAG	MCOLN3	7797.95	13680.8	7754.31
ARID3A_ACCAGGGGACGAGTCGCTCT	ARID3A	10072.9	16548.6	23482.3
HAND2_TATGAGGAGGTAGCCAATCC	HAND2	9202.25	6649.34	12770.1
KIAA1551_CTCTGGTGGCACTAGGACCG	KIAA1551	7082.35	5434.7	4531.54
FAS_GGTGTTCAAAGACGCTTCTG	FAS	5030.41	3105.4	494.168
FLG_GATGAGTACGTGAGGAAGCT	FLG	10015.5	10950.6	13420.9
NO-TARGET_GAGAGTGCGCCTTGATAGTA	NO-TARGET	8099.48	15737.9	16858.7
EYA4_GCGGGCTCGTGAGGCCGCCG	EYA4	4595.11	12575	10455.9
KPNA3_TACTGCCACCTCGCGCTCGG	KPNA3	8780.39	8537.13	10891.6
ARID3A_CACCCCCAGACAAATCACCA	ARID3A	10261.8	13235.3	22549.5
SPRY2_CTGCGCCCTCGCCTTTCCGG	SPRY2	7303.9	5229.78	9101.53
SLC4A1_TCTGTTTACTGGGCACCCAG	SLC4A1	6064.52	2107.55	2475.11
PRR16_TGCAAGCGTCAACCCTGGCG	PRR16	9377.78	18855.1	13452.2
GRAMD1A_CTGTCCAGTCCCTCTCTCCC	GRAMD1A	10327.7	19335.3	11595.2
NR2E1_AGTTGGGGGAAAAGCTAAGT	NR2E1	6900.45	3508.3	4564.29
CBFA2T2_CGCCGCCAGGCCAACGCACG	CBFA2T2	9718.95	82905.4	29954.9
SOS1_AGACAGGGAGGGCGCCCGGC	SOS1	7739.2	14394.5	8712.74
PRPS2_GGGGGAGCTGGAAAGTGCCG	PRPS2	7227.45	8528.22	14544.5
CASZ1_GCAGGTGAAAGAGCAGAGCG	CASZ1	6464.43	7642.24	9018.93
FXR1_TCCCACCTGGAGAGTCGGGG	FXR1	4650.32	4721.95	3383.7
BSX_GCCAATGACGAGGCTGCCAG	BSX	8304.74	4685.32	3516.14
WWTR1_GGGCTGGCCGGCTAGGGACT	WWTR1	7279.12	10225	5041.37
ETV1_GCGAGGGAGACCCGCGGGAA	ETV1	4842.13	3892.39	3773.91
RASGEF1C_CACCAGGGCCCTCCGTGCCC	RASGEF1C	9452.81	16718.9	11445.6
MYO1D_CCGCCCAGGTGAAGAGGCGG	MYO1D	6477.18	17304.9	12060.8
MCF2_CTAATCCACAAGGTTCAATC	MCF2	5829.53	6059.34	8466.37
CMTR2_ACTCCGCGAAGCAAAACCTA	CMTR2	7510.58	6784.96	10770.6
HNRNPU_GCACTGCGCAGGAGGAAAGC	HNRNPU	6104.87	3617.19	3553.17
DOCK9_TGGAGTAGTAACACCCCTGG	DOCK9	7742.74	9693.37	7097.8
ID3_GCAAACAGGCTTCCTCCGGC	ID3	7855.99	11310.9	8885.06
BSX_GGCAGAGGGGAGGGTGCGGG	BSX	7806.44	4914.99	7848.31
HEXIM1_CGTGCGACGTAGCCAATCCC	HEXIM1	6853.73	8376.76	4390.55
CCND1_AGAGAATGGGAGCGGGAGGG	CCND1	9128.63	19216.5	23677.4
PDPN_CCGCAAGGTGGTCTCCGTCC	PDPN	6692.35	2490.66	4369.19
SATB2_CCGCGCCGAGCCGAACGTCC	SATB2	7800.78	7785.78	8541.85
MAP1LC3C_TTCTCTGACCAGCAAGCAGG	MAP1LC3C	8814.37	7833.29	8170.16
SERTAD2_CCCGGCCCGCCTCTCCCCGG	SERTAD2	7022.19	5510.92	6475.46
FOXO4_CGGCCAGGAGCCCGATACGG	FOXO4	4636.16	2947.01	3665.68
CNNM4_AAGCGACTGTACCCCCTTAA	CNNM4	4482.56	3048.98	4330.74
PRR16_GGGACTGCAAGCGTCAACCC	PRR16	8738.63	15037	8981.9
TCF7L1_GCAGCTCTCCGGGTTCCGCG	TCF7L1	6710.05	1952.14	3856.51
WBP4_CTCCCGGCTCCAAAGAGGTG	WBP4	6337.03	4006.23	7499.4
ERBB3_CTCCCGCGCGAGGCTGGAGT	ERBB3	8887.98	33402.1	21025.7
ILKAP_GAAACACCGCGGGGCCCAGA	ILKAP	7031.39	3192.51	9316.57
KLF2_AGCCGCGGTATATAAGCCGG	KLF2	4664.47	1415.6	3130.21
TOB1_TCCGCGTCACACAGCTCCGG	TOB1	5239.92	3915.16	5249.29
NKX2-1_GGGGATCCGGGACAGCCTCC	NKX2-1	7993.31	6846.34	19845.1
OTOP2_GAAAGATGGATCATGTGAGC	OTOP2	5885.45	2656.96	3718.37
EYA4_CACGAGCCCGCAGTAGCCGG	EYA4	6671.82	10029	11909.9
SOX18_GTGCGCGGGGGAGGCCTCAG	SOX18	6896.91	2952.95	2658.83
BAG2_CCGATAGGAACCTTCGCGTG	BAG2	2501.4	2322.37	1976.67
MAP1LC3C_GACCTCCTGCTGCCCAGGGA	MAP1LC3C	11397.2	68947.4	24615.9
HNRNPU_CGCTGACGGGAGCACTGCGC	HNRNPU	5791.31	2927.21	2890.96
RBMS1_CCGAGCCCGGGACCCGCTGG	RBMS1	5818.91	4036.92	2194.56
PREX2_AGACTTTACATGCTGGGGAG	PREX2	7303.9	7464.05	5981.29
C4orf36_CCGCGACGTCCCTTGCCGCT	C4orf36	5770.78	4807.09	3359.49
NR1D1_ACCTGCTCCAGTGCCGCGTG	NR1D1	9985.79	11699	18529.2
FOXF1_TGCACCTCTGCCGTCATCGG	FOXF1	10481.3	7689.75	9067.35
ITGAV_CAGCTCCACAGCAGCCTCCC	ITGAV	8444.89	5943.52	4268.08
NO-TARGET_ATCGGTACCTCTTCACATAT	NO-TARGET	8176.63	15753.7	15232.3
SP8_TCCCACTCCCCCTTCCACCA	SP8	9723.2	9552.8	7666.02
FASLG_AGAGGTGTTTCCCTTAGCTA	FASLG	6067.35	9032.09	5242.17
PTPRC_ACTGTAAGGGTCCTCTTTGC	PTPRC	7158.8	7648.18	6936.87
ITM2B_CCCGCGCAGCACCCCACCCC	ITM2B	8482.4	7533.35	8395.17
TFEC_TTAGGGCATTTCCTGAACCC	TFEC	7468.82	11343.6	5937.14
DCUN1D5_GCTGTCTGACCCGTCGACTG	DCUN1D5	7705.23	10081.4	12361.3
FGF9_TCGCCTGCCGCAGAGCGGCG	FGF9	10332.6	17949.4	19205.6
MAP3K3_CTCACCAGCCAATAACAAGA	MAP3K3	7647.19	18436.4	13778.3
ZBP1_CGAATCTGGCCGGCCTGGCT	ZBP1	10001.4	14350	9591.42
GLIS3_CACAAGCTCGGCCTTCGAAT	GLIS3	5384.32	3559.78	4092.91
ITM2B_CCTGCCCTCGCCCCGCAGCT	ITM2B	8478.16	9758.7	11185
PTPRC_CTTCTCCAAAAATACTGTAA	PTPRC	8449.14	11955.3	14232.6
ITGB3_GGGGATCTAGAGAAGCCGGA	ITGB3	5637	6807.73	4960.2
TCF12_GCTCCGCCGCCTAGGAAGTG	TCF12	4987.23	3106.39	2590.47
NO-TARGET_AAACGAGATCGAGAAAGGTA	NO-TARGET	6801.35	11941.5	15416.1
FASLG_GCTTCAGCTGCAAAGTGAGT	FASLG	4908.67	3666.69	2517.84
ID3_AGCCTGTTTGCAATTTAAGC	ID3	7679.04	16553.6	18937.9
ZNF28_GAGACTCACAGGTCCCGCTC	ZNF28	8489.48	16656.5	15542.8
CCNE2_GGAGAGGGGAGCGCGCTGTC	CCNE2	3810.85	883.015	576.767
FNDC3B_TCGCAGAAGCTGTTGTCCCC	FNDC3B	8340.13	6671.12	4119.97
NDUFA4L2_AAAGTGAGCTAAGTTGGGGT	NDUFA4L2	8550.35	7887.74	9245.36
PTPRJ_GAGGGGATCCGCGGCCGGCT	PTPRJ	6148.75	6329.59	9480.34
LRRC15_AGTGTCAGCCCGGGACATGC	LRRC15	5225.77	1865.02	1130.75
TOB1_GCCGCCGGAGCTGTGTGACG	TOB1	5464.3	4095.33	6380.04
SEMA6A_GCAGAGGCGGAGAAACTACG	SEMA6A	8306.16	26810.2	25487.4
CFLAR_CAGTGTTTACTCCTAACGCG	CFLAR	6759.59	25130.3	83168.4
SOX9_CACTGGGCTGGGTGACGAGG	SOX9	5670.98	2627.27	1849.93
PTPN14_CACCCCAGAGCCGGGCTCCG	PTPN14	6361.8	3337.04	2180.32
TRPM3_TCCCGAAGCAGCACATTCCA	TRPM3	9037.33	38324	19880.7
RBMS1_ACTCAGCCCTCACCTCCAGC	RBMS1	10404.8	3886.45	4034.52
CAPN6_AGCCTCCTGAAGTTGCTGCG	CAPN6	10721.9	12482	16696.3
ITGB5_CAGAGTGTGCCGGCGCGCGG	ITGB5	9890.95	28573.3	24406.5
WWTR1_CTGGCCGGCTAGGGACTAGG	WWTR1	9927.75	19283.8	12293
CEBPB_CCCTGCCGCCGTCCTCCCGG	CEBPB	4536.36	1937.29	1159.23
NO-TARGET_CTCCTTACGTCGGGCATTAA	NO-TARGET	6818.34	10668.4	11519.7
FOXD4L6_AGCATCTTGAGGAGGTGGGA	FOXD4L6	7842.54	4427.94	4339.28
GSX1_GGCACAAAAACCCTATTGAG	GSX1	4617.76	1722.47	2379.7
LAPTM4B_CGCTGATGGATTTACTCACC	LAPTM4B	6348.35	1664.07	4873.33
TNFSF10_TTGAGACAAGAGCTGTCCCT	TNFSF10	11233	26156.8	19111.6
ITGA3_AGGAAAGCGCAGCCCGGGCT	ITGA3	8938.94	17508.8	24699.9
CAPN6_TGCCTCGCAGCAACTTCAGG	CAPN6	8340.84	10058.6	6943.99
NO-TARGET_AAATTGGCTTTCGTTCGTGC	NO-TARGET	8826.4	17281.2	17374.2
FOXD4L6_GAGTCTGCCCTTACCCAGAA	FOXD4L6	9860.51	17393	31794.8
TFEC_CCTGGTTGGAATTTCAGTTA	TFEC	8532.66	17861.3	17724.6
PTPN12_CTGTGTTCCTGAGGCGGCGG	PTPN12	5789.18	6938.4	4252.41
NRP1_CAATTACAGGCGAGCCCAAG	NRP1	7480.85	9669.61	9064.5
TRIM33_TACGCACGGACGTCCTCCCG	TRIM33	7752.65	7890.71	9033.17
MARCH8_AGCACAGAAAGGCCGCGCGG	2008-03-01	7140.39	11762.3	16925.6
TPM3_CGTACTCCAGGGCGACTGGG	TPM3	5699.29	5005.07	3190.02
PTPN12_AGCTAGCTGTGTTCCTGAGG	PTPN12	7531.11	3357.83	3575.96
FASN_GCGCACGAGCATCACCCCAC	FASN	7518.36	11642.5	15587
EGFR_GGAGAATGCGAGGAGGAGGG	EGFR	2910.52	742.445	506.985
PAGE4_AGCCTCTAGGAGGCGGGAGA	PAGE4	4383.47	2929.19	1867.02
NOTCH1_GCCAGCCAGCCGGGGAAGAG	NOTCH1	5323.44	1605.66	1325.85
PDS5B_AACCGCCGCGGACAGCACCC	PDS5B	8957.34	9247.9	6206.3
ITGB5_GCAGAGTGTGCCGGCGCGCG	ITGB5	5099.07	13251.2	11998.2
MITD1_CAGGCTTTGAGTGTAGCACT	MITD1	7513.41	10108.1	6519.6
JMJD1C_TGTAACTAATCCCCCGTCAC	JMJD1C	6395.78	9883.43	20626.9
ITGA3_GCTGGGCTCGCAAGGTGGGG	ITGA3	6591.13	7792.71	5714.98
OSR2_AGTGGACCATTAGCAGACGC	OSR2	7770.35	7003.73	7220.27
GSK3B_ATTCCCAGACGCCTGTTACG	GSK3B	7231.7	7683.81	9914.7
CCND1_AGCCCGGCAGAGAATGGGAG	CCND1	9139.96	5726.73	3306.8
HTR7_CGGCTGCCGCAGGGGAGCGG	HTR7	5319.2	6339.49	5283.47
ILKAP_CGCCCCGACTGCGAGCCGGG	ILKAP	5336.18	2945.03	3890.69
OSR2_TTAGCAGACGCCGGGCGCGG	OSR2	7097.93	3608.28	4048.76
PDS5B_CTGCCCCCGGGTGCTGTCCG	PDS5B	7512.7	10439.8	4688.19
UBALD2_TTACGGGAGCCGGGCGCTGG	UBALD2	6100.62	4658.6	2288.56
SOCS3_CAGCAGAGAAAGGCTGAGCG	SOCS3	8005.34	26031.1	43824.3
ZNF28_GTGAGTCTCAGCCTCCTCCC	ZNF28	8478.86	5328.78	4861.93
ITGA6_CAGAGCCGGCGGGTAAGGTG	ITGA6	7514.12	6221.69	10038.6
PCDH18_ATGGAGTCACCCAAGGAGGG	PCDH18	7981.98	10351.7	5827.48
KPNA3_GCGAGGTGGCAGTAGCGCCG	KPNA3	6707.92	7654.12	9326.54
ZEB2_CACGCGCCACCTATCTTTGT	ZEB2	7524.03	3842.9	2923.71
SERPINE1_GCCTCAGCAAGTCCCAGAGA	SERPINE1	6958.49	9563.69	7849.73
FNDC3B_CTGCGAGTCTGCGATTGTGG	FNDC3B	7139.69	9744.84	7586.27
NRP2_AGAGCTATCCGATTACGCGC	NRP2	5451.56	8486.64	11015.5
FOXO4_TCGCGGCCAGGAGCCCGATA	FOXO4	5831.65	4512.09	5280.62
SPRY2_GCTCCCTGCCTCCTCCGGAA	SPRY2	8873.82	9185.53	12411.2
TRH_GCTCCTCCGGAAATCTGGGG	TRH	5318.49	5241.66	3068.97
MYCBP2_GCCCCAAACCCAAAGCCCCG	MYCBP2	7994.01	15073.6	13107.6
SRSF9_GCAGCCGCGTTCTCTTTAAG	SRSF9	3815.81	5024.87	3024.82
SOS1_GAGCGCAGCCACAGCCCGGC	SOS1	7412.19	19215.5	13103.3
HTR2A_CAAGGTAGCAACAGCCAGGA	HTR2A	5518.09	5079.32	3855.08
TPM3_GTCCACTGGAGGGAGAGCCG	TPM3	5954.1	1607.64	1506.72
FLG_GGTTGCTGGAGAAATAGAGG	FLG	5256.2	2437.2	2381.12
MAP3K3_GGTGGGTGGGGGTGGTGCGA	MAP3K3	9322.57	13715.4	15757.8
NO-TARGET_AGAAACTGAACTATCCTACT	NO-TARGET	7282.66	12165.2	13751.3
RASA3_GGCGGGTGGCGGAGACCCGG	RASA3	4292.16	3124.21	2466.57
GBX2_CCACCCAAGCTGGCCTCGAG	GBX2	8044.27	7038.38	5890.15
TRPM3_TTCAAGTAAGCAATGAACTT	TRPM3	9003.35	36771.8	18381.1
SOX10_GCCCTGAGTGTTGGGGATGA	SOX10	8456.92	9717.12	6844.3
PAGE4_AGCCCTCTCCCGCCTCCTAG	PAGE4	8118.59	3960.7	2429.54
RRAS2_TGAGGTTCGGGAGGTAACCC	RRAS2	7738.49	10897.1	11576.6
FAM49A_GGACGCGGCCGGTGACAGCG	FAM49A	7451.12	5463.41	4937.41
CUL3_ACGAGATCCGGCCCAGAGGG	CUL3	5525.88	4184.42	2084.91
ARID5B_GCAACTCCAGCAAAGTCCTC	ARID5B	7893.5	7624.42	8040.56
MYCBP2_ACCCAAAGCCCCGAGGCGGA	MYCBP2	8105.14	23068.3	14669.8
UBTF_CCCGGGAGGCGGCGGCGCCG	UBTF	4858.41	3076.69	5666.56
RAPGEF2_TGTACGTCAGAACTACCCAG	RAPGEF2	7189.23	4479.42	4409.06
MBTD1_CTCCTCTCTCGCTTCCACCG	MBTD1	10196.7	22714.9	29177.3
KIAA0368_CCGGGACTGAGTCAGCGCCG	KIAA0368	8229.01	7364.07	9302.33
PDPN_GGCCAAACAGAGCCCGAGGG	PDPN	3780.42	4024.05	1943.92
TAF15_GTACTAGCCGCCGAGCCCTG	TAF15	7935.97	1976.88	1144.99
GPR137B_GGCCGGTCGGCGCGCGGGGG	GPR137B	4138.57	1860.07	2752.82
RAB3IL1_GGGAGACCACGGCGCTCGGA	RAB3IL1	9286.48	14979.6	10286.4
FOXD1_GTCAGAGCGCTGCCGAGGGA	FOXD1	4566.79	1986.78	1506.72
ANXA2R_CCACCGGAAAACTGTCTGCT	ANXA2R	5924.38	4880.34	2695.85
RNF19B_GCCCAGCGCACTCCTAGACC	RNF19B	10380	14605.4	64239
ARHGAP42_AGCGCTTGCAAATCGCACCC	ARHGAP42	6186.97	3341	2151.84
RIMKLA_GGCTGCAGAAGCGACCCTGG	RIMKLA	7871.56	9249.88	9246.79
SP8_CACTCCCCCTTCCACCACGG	SP8	10834.5	14134.2	9570.06
PPP1R14B_AGGGGAGGGTCTATTCGGCA	PPP1R14B	8050.64	17544.5	12651.9
INSM2_CTACTCCAGTGAATCGGCAC	INSM2	5607.98	3252.9	4299.41
NR2E1_GAGTTGGGGGAAAAGCTAAG	NR2E1	10242.7	4411.12	5965.62
PDCD5_GGGTGGGAGGTGGATCCCGG	PDCD5	7369.72	4384.39	4262.38
HEXIM1_AAGATAAGAACTACGACTCC	HEXIM1	6998.12	8273.81	4461.76
ANXA2R_CCAGTTTCTCGTTTGCAAGG	ANXA2R	4921.41	2747.05	1455.45
TFAP4_ATTCCTTACTCCGCGGAAGG	TFAP4	6894.08	10249.7	5836.03
SRSF2_GGCAGGGTCGTTACGAAGCG	SRSF2	6114.78	8669.78	11173.6
C4orf36_GACGTCCCTTGCCGCTTGGG	C4orf36	6265.54	2787.63	2147.57
TCF7L1_CCGGGTTCCGCGAGGCGCGC	TCF7L1	5890.4	2224.37	4689.62
MXI1_GGAGACTAGCGAGCGAGGCA	MXI1	4999.97	1126.54	515.53
SLC4A2_GTGGAGAAGCTTGGGGCAGA	SLC4A2	8762.7	5392.13	9604.24
SATB2_CCGGGAAAAGTTGCTCGGAG	SATB2	5597.37	3972.58	4303.68
LATS2_GAGCGGCCGCGGAGGAGCAG	LATS2	5740.34	2006.58	2705.82
UBTF_TGACGGGCAAGCGCTCGGAG	UBTF	5780.69	4288.36	2423.85
INSM2_GGAGTAGACGAATCTGGCGG	INSM2	3977.9	1311.65	1248.95
GLIS3_TGTGTGTGAATGCGTCAAGA	GLIS3	6215.99	3911.2	4638.35
NO-TARGET_CGAACTTAATCCCGTGGCAA	NO-TARGET	6518.94	10599.1	14392.1
SOCS3_CAGAGAAAGGCTGAGCGCGG	SOCS3	7313.81	16741.6	36736.5
UBALD2_GCCAGCGCCCGGCTCCCGTA	UBALD2	5366.62	2627.27	1757.36
EGR3_AACATTAGAAAGCAGGAAGC	EGR3	4251.11	4229.96	4713.83
FASN_CACGAGCATCACCCCACCGG	FASN	6029.13	3620.16	4390.55
NFATC1_CGCTCGGCGACTCGTCCCCG	NFATC1	3564.53	1002.8	1048.15
MAP1B_CCGCGTGAGGATGTGCCGGG	MAP1B	5844.39	4324.99	4309.38
IRX5_GGGAGAGGGCGAGGCGCGCC	IRX5	6395.78	3814.19	5996.95
SERTAD2_GGTCCCGGGAGGCGCGATAA	SERTAD2	4871.86	3531.07	7472.34
ETV1_GGCGAGGGAGACCCGCGGGA	ETV1	7078.81	6827.53	6961.08
WBP4_CGGTACTCCCGGCTCCAAAG	WBP4	5840.85	3833	7802.73
NR1D1_AGGCGCTCCCTGGGATCACA	NR1D1	9898.73	4190.36	12690.3
GRAMD1A_GGCCGCAGAGGCCTAGAAGG	GRAMD1A	5675.23	5401.04	3432.12
ITGA6_GCCGGCGGGTAAGGTGCGGG	ITGA6	5858.55	3193.5	5794.73
VGLL2_GGGGGGCCAATGGGGAGCGA	VGLL2	7691.78	6534.51	13405.2
SERPINE1_TCAGCAAGTCCCAGAGAGGG	SERPINE1	8093.81	17897.9	9010.38
IRX5_AGAGGGCGAGGCGCGCCTGG	IRX5	7779.55	2171.9	2851.08
RUNX2_ACAGTACTCTTAAGTAAAGT	RUNX2	3338.74	861.237	1200.53
AMOTL2_TGTGGTTCGCTTTGATCCCG	AMOTL2	7202.68	11266.4	12508
CASP8_GCAGCTTTAGAAGCTTTAGA	CASP8	2127.68	2003.61	1200.53
MSI1_GGGGCTTTATGCGCGCAGGG	MSI1	6622.28	19679.8	35275.4
KLF2_GCCGCGGTATATAAGCCGGC	KLF2	4152.02	1968.96	3632.92
CLIP1_CGCGGCGGCGGAGCGCTGGG	CLIP1	4624.13	3867.65	2016.55
MITD1_GGAGGTCGCGCTCACTGCGA	MITD1	8039.31	11016.9	5569.72
PSME2_ACTGGCTGGGAATGGCTGAG	PSME2	3241.77	1348.28	534.044
ZC3HAV1_GGTCTGCTCTTTCCGGGAAT	ZC3HAV1	4169	2840.1	1995.19
BAHCC1_CGAGCGGCGGCCAGGCCGGG	BAHCC1	7009.45	2059.05	5404.52
CEBPA_GCTGGGTCCTAGCGCGCGGC	CEBPA	1931.62	1377.98	629.459
NO-TARGET_GAACGTCCAAGCAAGGGAGC	NO-TARGET	4707.65	6748.33	4749.43
PTPRJ_GGGATCCGCGGCCGGCTCGG	PTPRJ	1475.08	821.639	2170.35
CASP1_TACAGTTCTGATTCTTTAAT	CASP1	4179.62	4158.68	1345.79
CASP8_AAGGCACTCTGCTCACTCAG	CASP8	2333.65	4783.33	1207.65
PLAUR_AGGAGGTTCGTACGGGAGGA	PLAUR	4428.77	1883.83	1636.31
CNNM4_CGACTGTACCCCCTTAAGGG	CNNM4	4082.65	2348.11	2187.44
PRDM1_CGGCTGTGCTAGCAATCTGG	PRDM1	2195.63	1107.73	605.249
